# Supplementary material for: Quantitative Proteomic Characterization of Foreign Body Response towards Silicone Breast Implants Identifies Chronological Disease-Relevant Biomarker Dynamics
Source: Biomolecules. 2023 Feb 6;13(2):305. doi: 10.3390/biom13020305 (PMC9953687; doi:10.3390/biom13020305)
Supplement: Supplementary file 1 [file biomolecules-13-00305-s001.zip › Supplementary tables.xlsx]

## Sheet: Table S1- GO BP_enrichment_all
enrichment_all
Enrichment FDR	nGenes	Pathway Genes	Fold Enrichment	Pathway	URL	Genes
1.0113406055781e-19	122	1636	2.5313895179206	Secretion	http://amigo.geneontology.org/amigo/term/GO:0046903	FGR PAFAH1B1 NADK PGLYRP1 PLAUR MVP RNASET2 GRN CYBA HEBP2 CNN2 RHOA ROCK1 KCNAB2 RAB27A STK10 TSG101 STXBP2 XRCC5 CD59 CPNE3 ERP29 LTBP4 DPYSL2 MAPK1 PYGB CTSZ VAPA OLFM4 MAN2B1 NAPA RAB3D CAV1 PPP3CB SYNGR2 RAB5C VAT1 LAMTOR3 NFKB1 MANBA CTSC PSMD9 CAND1 GNAI2 PLEK PADI2 RAB14 LTBP2 COPA SRGN ADGRE5 NCKAP1L SERPINB6 GOT2 FGL2 SIGLEC9 CHMP2A DIAPH1 MYH10 CHI3L1 CHIT1 AMPD3 DOCK2 OSTF1 GNS GLUL S…
7.58567553024481e-19	116	1545	2.5486602851764	Export from cell	http://amigo.geneontology.org/amigo/term/GO:0140352	FGR PAFAH1B1 NADK PGLYRP1 PLAUR MVP RNASET2 GRN CYBA HEBP2 CNN2 RHOA ROCK1 KCNAB2 RAB27A STK10 TSG101 STXBP2 XRCC5 CD59 CPNE3 ERP29 LTBP4 DPYSL2 MAPK1 PYGB CTSZ VAPA OLFM4 MAN2B1 NAPA RAB3D PPP3CB SYNGR2 RAB5C VAT1 LAMTOR3 NFKB1 MANBA CTSC PSMD9 CAND1 GNAI2 PLEK PADI2 RAB14 LTBP2 SRGN ADGRE5 NCKAP1L SERPINB6 FGL2 SIGLEC9 CHMP2A DIAPH1 MYH10 CHI3L1 CHIT1 AMPD3 DOCK2 OSTF1 GNS GLUL SCRN1 PRCP OLA1 …
4.19130168561482e-20	116	1489	2.64451319046175	Secretion by cell	http://amigo.geneontology.org/amigo/term/GO:0032940	FGR PAFAH1B1 NADK PGLYRP1 PLAUR MVP RNASET2 GRN CYBA HEBP2 CNN2 RHOA ROCK1 KCNAB2 RAB27A STK10 TSG101 STXBP2 XRCC5 CD59 CPNE3 ERP29 LTBP4 DPYSL2 MAPK1 PYGB CTSZ VAPA OLFM4 MAN2B1 NAPA RAB3D PPP3CB SYNGR2 RAB5C VAT1 LAMTOR3 NFKB1 MANBA CTSC PSMD9 CAND1 GNAI2 PLEK PADI2 RAB14 LTBP2 SRGN ADGRE5 NCKAP1L SERPINB6 FGL2 SIGLEC9 CHMP2A DIAPH1 MYH10 CHI3L1 CHIT1 AMPD3 DOCK2 OSTF1 GNS GLUL SCRN1 PRCP OLA1 …
2.88696597456656e-11	115	1935	2.01743391325277	Protein-containing complex assembly	http://amigo.geneontology.org/amigo/term/GO:0065003	WAS CUL3 CYBA CUL1 EIF4B RHOA UBE2K XRCC5 DNM2 RPS5 CD59 EPS15 TMED2 FKBP1A PSMD5 PSMD8 ATP5F1D SF3A1 SNRPD3 PSMC6 PSMB5 CTSZ MAPRE1 CHMP4B PSMD10 PPP6R1 NAPA PPP2R1A MTPN EIF3B EIF3A CRYAB CTSC EHD1 PSMD9 PTGES3 CAND1 CPSF6 CLINT1 SKP1 TFG RTN4 DARS1 PLEK STMN1 CASQ2 CLTA NCKAP1L EML2 SNRPB PSMB2 CHMP2A CLIP1 DIAPH1 ALOX5AP DHX9 ARPC5L NUMA1 RDX TMOD3 USO1 DENR PML HSPD1 COPS7B LUC7L2 ADD3 RPS3 …
1.1083392095408e-11	113	1857	2.06561313152249	Intracellular transport	http://amigo.geneontology.org/amigo/term/GO:0046907	PAFAH1B1 VTA1 WAS EHD2 CUL3 IPO5 VPS35 RAB27A TSG101 STXBP2 DYNC1I2 XPO1 RPS5 CD59 EPS15 CHMP5 TMED2 ERP29 ATP5F1D RANBP1 SNRPD3 MAPK1 SUN2 CTSZ CHMP4B VAPA EEA1 NUTF2 RAB2A PPP6R1 NAPA RAB3D COPE RAB5C CRYAB CTSC EHD1 ATP5F1B VPS29 CPSF6 SRSF3 RPS12 SNX3 PDCD10 TFG SRSF4 RAB14 LTBP2 UFM1 COPA CLTA SSR1 RAB17 SNRPB EPS15L1 REEP5 CHMP2A RAN SRRM1 ARF3 HNRNPA1 DHX9 RPL35 RPS6 NUMA1 RDX SSB USO1 MAP…
7.36759096927444e-14	110	1658	2.25211521705487	Cell activation	http://amigo.geneontology.org/amigo/term/GO:0001775	FGR GCLC PGLYRP1 PLAUR MVP WAS GCLM RNASET2 GRN CYBA HEBP2 CNN2 KARS1 RHOA ROCK1 IFI35 KCNAB2 RAB27A STK10 STXBP2 XRCC5 CD59 CPNE3 FKBP1A MAPK1 PYGB CTSZ VAPA OLFM4 CSK MAN2B1 CLC RAB3D CAV1 PPP3CB RAB5C VAT1 PRKAR1A LAMTOR3 NFKB1 MANBA CTSC CAND1 GNAI2 PLEK PADI2 RAB14 ADGRE5 NCKAP1L NMI SERPINB6 FGL2 SIGLEC9 AKAP12 DIAPH1 CHI3L1 CHIT1 SPINK5 SWAP70 AMPD3 IL6ST DOCK2 OSTF1 DYSF GNS RPS6 PRCP PFK…
1.52401642000589e-07	105	1974	1.80561268369293	Cellular macromolecule localization	http://amigo.geneontology.org/amigo/term/GO:0070727	EHD2 IPO5 ROCK1 VPS35 KCNAB2 RAB27A TSG101 STXBP2 XRCC5 FYB1 XPO1 RPS5 TMED2 NSFL1C ERP29 CRKL MAPK1 PPM1F SUN2 MAPRE1 CHMP4B VAPA NUTF2 CSK NAPA RAB3D CAV1 RAB5C LAMTOR3 EHD1 VPS29 RPS12 SKP1 PDCD10 RTN4 CCT4 GBP1 RAB14 LTBP2 UFM1 COPA CLTA SRGN SSR1 RAB17 SEPTIN6 CSRP3 DIAPH1 RAN LAMTOR5 ARF3 CCT7 GLUL DHX9 RPL35 RPS6 NUMA1 RDX SSB SEPTIN11 USO1 MAPK8IP3 PML RPS8 SNAPIN SRP9 HSPD1 ATG3 RPS3 CCT…
1.12361894639834e-07	105	1960	1.81850991714788	Cellular protein localization	http://amigo.geneontology.org/amigo/term/GO:0034613	EHD2 IPO5 ROCK1 VPS35 KCNAB2 RAB27A TSG101 STXBP2 XRCC5 FYB1 XPO1 RPS5 TMED2 NSFL1C ERP29 CRKL MAPK1 PPM1F SUN2 MAPRE1 CHMP4B VAPA NUTF2 CSK NAPA RAB3D CAV1 RAB5C LAMTOR3 EHD1 VPS29 RPS12 SKP1 PDCD10 RTN4 CCT4 GBP1 RAB14 LTBP2 UFM1 COPA CLTA SRGN SSR1 RAB17 SEPTIN6 CSRP3 DIAPH1 RAN LAMTOR5 ARF3 CCT7 GLUL DHX9 RPL35 RPS6 NUMA1 RDX SSB SEPTIN11 USO1 MAPK8IP3 PML RPS8 SNAPIN SRP9 HSPD1 ATG3 RPS3 CCT…
4.02659676919832e-07	104	1989	1.77492906946024	Establishment of protein localization	http://amigo.geneontology.org/amigo/term/GO:0045184	PAFAH1B1 NADK VTA1 MVP IPO5 VPS35 RAB27A TSG101 STXBP2 DNM2 XPO1 RPS5 EPS15 CHMP5 TMED2 ERP29 MAPK1 PPM1F CHMP4B VAPA RP2 NUTF2 CSK RAB2A NAPA RAB3D COPE CAV1 PPP3CB RAB5C EHD1 PSMD9 VPS29 RPS12 SNX3 PDCD10 ATP6V1A CCT4 PLEK RAB14 LTBP2 UFM1 COPA CLTA SSR1 RAB17 ATP6V1F CHMP2A RAN MYH10 ARF3 CCT7 GLUL RPL35 RPS6 RDX USO1 HADH MAPK8IP3 PML PFKL RPS8 SNAPIN SRP9 HSPD1 ATG3 PAM BTF3 RPS3 PFKM CCT8 A…
2.74281407877552e-14	103	1475	2.37043281403592	Leukocyte activation	http://amigo.geneontology.org/amigo/term/GO:0045321	FGR PGLYRP1 PLAUR MVP WAS RNASET2 GRN CYBA HEBP2 CNN2 KARS1 RHOA ROCK1 IFI35 KCNAB2 RAB27A STK10 STXBP2 XRCC5 CD59 CPNE3 FKBP1A MAPK1 PYGB CTSZ VAPA OLFM4 CSK MAN2B1 CLC RAB3D CAV1 PPP3CB RAB5C VAT1 PRKAR1A LAMTOR3 NFKB1 MANBA CTSC CAND1 PADI2 RAB14 ADGRE5 NCKAP1L NMI SERPINB6 FGL2 SIGLEC9 DIAPH1 CHI3L1 CHIT1 SPINK5 SWAP70 AMPD3 IL6ST DOCK2 OSTF1 DYSF GNS RPS6 PRCP PFKL ILF2 HSPD1 RPS3 VSIG4 CCT8…
5.88845257857726e-18	100	1245	2.72654766694193	Immune effector process	http://amigo.geneontology.org/amigo/term/GO:0002252	FGR PGLYRP1 PLAUR MVP WAS RNASET2 GRN CYBA HEBP2 CNN2 KARS1 RHOA ROCK1 IFI35 KCNAB2 RAB27A STK10 STXBP2 XRCC5 CD59 CPNE3 MAPK1 PYGB CTSZ VAPA OLFM4 MAN2B1 CLC RAB3D PPP3CB RAB5C VAT1 LAMTOR3 NFKB1 MANBA CTSC CAND1 RTN4 PADI2 RAB14 ADGRE5 NCKAP1L NMI SERPINB6 FGL2 SIGLEC9 DIAPH1 CHI3L1 CHIT1 SPINK5 SWAP70 AMPD3 DOCK2 OSTF1 DYSF GNS RPS6 PRCP PFKL ILF2 HSPD1 VSIG4 CCT8 PSMC2 AGL PSMD6 PRKCD PSMC3 P…
7.82739728953566e-23	98	1027	3.23920234511768	Exocytosis	http://amigo.geneontology.org/amigo/term/GO:0006887	FGR PGLYRP1 PLAUR MVP RNASET2 GRN CYBA HEBP2 CNN2 RHOA ROCK1 KCNAB2 RAB27A STK10 TSG101 STXBP2 XRCC5 CD59 CPNE3 MAPK1 PYGB CTSZ VAPA OLFM4 MAN2B1 NAPA RAB3D PPP3CB SYNGR2 RAB5C VAT1 LAMTOR3 NFKB1 MANBA CTSC CAND1 GNAI2 PLEK PADI2 RAB14 SRGN ADGRE5 NCKAP1L SERPINB6 FGL2 SIGLEC9 CHMP2A DIAPH1 CHI3L1 CHIT1 AMPD3 DOCK2 OSTF1 GNS SCRN1 PRCP OLA1 MMRN1 PFKL SNAPIN ILF2 CCT8 CALM3 PSMC2 AGL PSMD6 PF4 PR…
4.12402685580266e-06	97	1910	1.72393470679708	Regulation of transport	http://amigo.geneontology.org/amigo/term/GO:0051049	FGR GCLC NADK EHD2 CYBA CNN2 IPO5 RHOA ROCK1 VPS35 KCNAB2 RAB27A TSG101 STXBP2 DNM2 XPO1 FKBP1A ERP29 DPYSL2 MAPK1 PPM1F NUTF2 CSK RAB3D CAV1 SFRP4 PPP3CB RAB5C NFKB1 CRYAB EHD1 TMEM109 PSMD9 CPSF6 SNX3 PDCD10 GNAI2 CASQ2 UFM1 NCKAP1L RAB17 REEP5 CHMP2A DIAPH1 RAN MYH10 DOCK2 DYSF GLUL DHX9 NUMA1 RDX HADH PML PFKL SNAPIN ATG3 CAMK2D PAM PFKM EPB41 CALM3 S100A1 AP2M1 PM20D1 PRKCD ACAA2 MAP2K1 KIF5…
1.63100725696301e-06	97	1867	1.76363968397559	Protein transport	http://amigo.geneontology.org/amigo/term/GO:0015031	PAFAH1B1 NADK VTA1 MVP IPO5 VPS35 RAB27A TSG101 STXBP2 DNM2 XPO1 RPS5 EPS15 CHMP5 TMED2 ERP29 MAPK1 PPM1F CHMP4B RP2 NUTF2 CSK RAB2A NAPA RAB3D COPE CAV1 PPP3CB RAB5C EHD1 PSMD9 VPS29 RPS12 SNX3 PDCD10 ATP6V1A PLEK RAB14 LTBP2 UFM1 COPA CLTA SSR1 RAB17 ATP6V1F CHMP2A RAN MYH10 ARF3 GLUL RPL35 RPS6 USO1 HADH MAPK8IP3 PML PFKL RPS8 SNAPIN SRP9 HSPD1 ATG3 PAM BTF3 RPS3 PFKM AIFM1 AP2M1 PRKCD STX3 KI…
3.0798684406792e-05	93	1905	1.65718279063975	Response to biotic stimulus	http://amigo.geneontology.org/amigo/term/GO:0009607	FGR PGLYRP1 STAB1 DCN WAS RNASET2 GRN CYBA CUL1 RHOA IFI35 RAB27A UBE2K BPIFB2 XRCC5 CHMP5 CCDC80 PSMD5 FKBP5 PSMD8 MAPK1 DDX17 PSMC6 PSMB5 USP14 PSMD10 CAV1 NFKB1 PSMD9 SNX3 SKP1 NCF2 GBP1 STMN1 RAB14 IFIT2 NMI PSMB2 FGL2 AKAP12 BPIFA2 CHIT1 SPINK5 LAMTOR5 SYNCRIP DHX9 CASP1 PML TMCO1 HSPD1 CAMK2D TKFC VSIG4 PSMC2 GBP2 CAPN2 IFI16 PSMD6 PF4 PRKCD HMGB2 ERAP1 RNASE7 PSMC3 WFDC12 RNASE3 KRT8 SERPI…
4.22682516832559e-08	93	1620	1.94872420751155	Macromolecule catabolic process	http://amigo.geneontology.org/amigo/term/GO:0009057	GCLC PGLYRP1 DCN RNASET2 CUL3 CUL1 ROCK1 VPS35 TSG101 UBE2K XPO1 RPS5 NSFL1C HNRNPC PSMD5 PSMD8 PSMC6 PSMB5 PYGB CTSZ EEF1A2 CHMP4B USP14 PSMD10 UBE2I PPP2CB PPP2R1A CAV1 ERLIN1 NAGLU MANBA CTSC DCPS PSMD9 USP5 RPS12 SNX3 SKP1 UCHL3 IDE CLTA PSMB2 CHI3L1 CHIT1 SYNCRIP GNS DHX9 RPL35 RPS6 RDX SSB PML RPS8 RPS3 PFKM AIFM1 RNF111 PSMC2 AP2M1 AGL CAPN2 PSMD6 PRKCD HMGB2 PSMC3 DDB1 PGM2 RNASE3 GUSB PP…
7.27009243249486e-24	93	903	3.49605007327654	Regulated exocytosis	http://amigo.geneontology.org/amigo/term/GO:0045055	FGR PGLYRP1 PLAUR MVP RNASET2 GRN CYBA HEBP2 CNN2 RHOA ROCK1 KCNAB2 RAB27A STK10 STXBP2 XRCC5 CD59 CPNE3 MAPK1 PYGB CTSZ VAPA OLFM4 MAN2B1 NAPA RAB3D PPP3CB SYNGR2 RAB5C VAT1 LAMTOR3 NFKB1 MANBA CTSC CAND1 GNAI2 PLEK PADI2 RAB14 SRGN ADGRE5 NCKAP1L SERPINB6 FGL2 SIGLEC9 DIAPH1 CHI3L1 CHIT1 AMPD3 DOCK2 OSTF1 GNS PRCP OLA1 MMRN1 PFKL SNAPIN ILF2 CCT8 CALM3 PSMC2 AGL PSMD6 PF4 PRKCD PSMC3 STX3 PGM2 …
2.43754480785416e-05	92	1867	1.67273042191499	Response to external biotic stimulus	http://amigo.geneontology.org/amigo/term/GO:0043207	FGR PGLYRP1 STAB1 DCN WAS RNASET2 GRN CYBA CUL1 RHOA IFI35 RAB27A UBE2K BPIFB2 XRCC5 CHMP5 CCDC80 PSMD5 FKBP5 PSMD8 MAPK1 DDX17 PSMC6 PSMB5 USP14 PSMD10 CAV1 NFKB1 PSMD9 SNX3 SKP1 NCF2 GBP1 STMN1 RAB14 IFIT2 NMI PSMB2 FGL2 AKAP12 BPIFA2 CHIT1 SPINK5 LAMTOR5 SYNCRIP DHX9 CASP1 PML HSPD1 CAMK2D TKFC VSIG4 PSMC2 GBP2 CAPN2 IFI16 PSMD6 PF4 PRKCD HMGB2 ERAP1 RNASE7 PSMC3 WFDC12 RNASE3 KRT8 SERPINB9 KI…
2.39984124144442e-05	92	1866	1.67362684765021	Response to other organism	http://amigo.geneontology.org/amigo/term/GO:0051707	FGR PGLYRP1 STAB1 DCN WAS RNASET2 GRN CYBA CUL1 RHOA IFI35 RAB27A UBE2K BPIFB2 XRCC5 CHMP5 CCDC80 PSMD5 FKBP5 PSMD8 MAPK1 DDX17 PSMC6 PSMB5 USP14 PSMD10 CAV1 NFKB1 PSMD9 SNX3 SKP1 NCF2 GBP1 STMN1 RAB14 IFIT2 NMI PSMB2 FGL2 AKAP12 BPIFA2 CHIT1 SPINK5 LAMTOR5 SYNCRIP DHX9 CASP1 PML HSPD1 CAMK2D TKFC VSIG4 PSMC2 GBP2 CAPN2 IFI16 PSMD6 PF4 PRKCD HMGB2 ERAP1 RNASE7 PSMC3 WFDC12 RNASE3 KRT8 SERPINB9 KI…
5.02821921120671e-16	92	1158	2.69688056797521	Viral process	http://amigo.geneontology.org/amigo/term/GO:0016032	VTA1 CUL1 IPO5 KARS1 RHOA VPS35 ST6GAL1 TSG101 DYNC1I2 XRCC5 XPO1 RPS5 EPS15 CHMP5 RTRAF SF3B2 GANAB RANBP1 MAPK1 AHSA1 PSMB5 CHMP4B VAPA EEA1 UBE2I CAV1 EIF3B EIF3A CBX1 SYNGR2 VPS29 RPS12 SNX3 SKP1 IDE SEPTIN6 PSMB2 CHMP2A MGAT1 RAN RTN3 LAMTOR5 IL6ST DOCK2 SYNCRIP HNRNPA1 DHX9 RPL35 RPS6 SSB DENR PML RPS8 SNAPIN HSPD1 COPS7B RPS3 EIF4E AP2M1 ASGR2 EIF4A1 RBBP4 IFI16 PSMC3 DDB1 COPS6 KRT8 IL16 …
1.44397658489356e-05	91	1816	1.7010144158931	Positive regulation of molecular function	http://amigo.geneontology.org/amigo/term/GO:0044093	FGR PLAUR GCLM GRN CYBA RHOA ARHGEF1 XRCC5 DNM2 FKBP1A ARHGAP4 RANBP1 CRKL MAPK1 PPM1F SH3BP1 AHSA1 EEF1A2 MAPRE1 PSMD10 RP2 UBE2I CSK STK3 PPP2CB NAPA MTPN CAV1 PRKAR1A NFKB1 PTGES3 SKP1 PDCD10 PRKAR2A GNAI2 CCT4 HSPE1 PLEK STMN1 PTPA IDE NCKAP1L RAN CHI3L1 EIF2S1 LAMTOR5 DOCK2 DHX9 CASP1 PML HSPD1 TIAM2 RSU1 RPS3 ASAP1 AIFM1 EPB41 CALM3 S100A1 IFI16 PRKCD HMGB2 MAP2K1 KIF5B PRNP DAG1 MOB1B CCS …
0.00137864826014055	87	1961	1.50599699410921	Organonitrogen compound biosynthetic process	http://amigo.geneontology.org/amigo/term/GO:1901566	GCLC NADK DCN GCLM EIF4B HAGH KARS1 RHOA ROCK1 ST6GAL1 MOCOS RPS5 TMED2 SPTLC1 DLD ATP5F1D MTAP MAPK1 EEF1A2 VAPA SMS EARS2 MTPN EIF3B EIF3A NFKB1 GALNT7 DCPS ATP5F1B RPS12 ATP6V1A DARS1 GOT2 UROD PAICS PUDP MGAT1 CNDP2 AMPD3 EIF2S1 GSTM1 SYNCRIP GLUL DHX9 NIBAN1 RPL35 RPS6 ATIC ESD DENR PML RPS8 SRP9 PAM RPS3 EIF4E QDPR ATP5F1A IMPACT ATP5MC3 ASGR2 EIF4A1 CAPN2 PRKCD NUDT2 FASN PA2G4 PPP1CA NADS…
0.000236055365940915	87	1847	1.59894970516955	Regulation of cell death	http://amigo.geneontology.org/amigo/term/GO:0010941	GCLC HSPB6 PLAUR GCLM GRN HEBP2 SLK RHOA VPS35 ARHGEF1 DNM2 AKR1B1 ERP29 SPTLC1 MAPK1 CTSZ EEF1A2 CHMP4B PSMD10 STK3 CAV1 SFRP4 NFKB1 CRYAB CTSC DCPS TMEM109 PDCD10 GNAI2 GBE1 RTN4 LANCL1 PTPA IFIT2 UFM1 NCKAP1L NQO2 GLO1 CHMP2A AKAP12 EIF2S1 LAMTOR5 IL6ST RPS6 CASP1 PML MIEN1 ANP32E HSPD1 CAMK2D TIAM2 RPS3 IMPACT AIFM1 PM20D1 CAPN2 PF4 PRKCD HMGB2 API5 ACAA2 DDB1 PA2G4 SERPINB9 PRNP PPP1CA SNCG …
3.41958548529134e-18	87	975	3.02898472353657	Leukocyte mediated immunity	http://amigo.geneontology.org/amigo/term/GO:0002443	FGR PGLYRP1 PLAUR MVP WAS RNASET2 GRN CYBA HEBP2 CNN2 RHOA ROCK1 KCNAB2 RAB27A STK10 STXBP2 XRCC5 CD59 CPNE3 MAPK1 PYGB CTSZ VAPA OLFM4 MAN2B1 CLC RAB3D PPP3CB RAB5C VAT1 LAMTOR3 NFKB1 MANBA CTSC CAND1 PADI2 RAB14 ADGRE5 NCKAP1L SERPINB6 FGL2 SIGLEC9 DIAPH1 CHI3L1 CHIT1 SWAP70 AMPD3 DOCK2 OSTF1 GNS PRCP PFKL ILF2 HSPD1 CCT8 PSMC2 AGL PSMD6 PRKCD PSMC3 PGM2 RNASE3 GUSB PA2G4 SERPINB9 KIF5B FPR1 OL…
3.27827119197959e-22	87	847	3.48672975849841	Cell activation involved in immune response	http://amigo.geneontology.org/amigo/term/GO:0002263	FGR PGLYRP1 PLAUR MVP RNASET2 GRN CYBA HEBP2 CNN2 KARS1 RHOA ROCK1 IFI35 KCNAB2 RAB27A STK10 STXBP2 XRCC5 CD59 CPNE3 MAPK1 PYGB CTSZ VAPA OLFM4 MAN2B1 RAB3D RAB5C VAT1 LAMTOR3 NFKB1 MANBA CTSC CAND1 PADI2 RAB14 ADGRE5 NCKAP1L NMI SERPINB6 FGL2 SIGLEC9 DIAPH1 CHI3L1 CHIT1 SWAP70 AMPD3 DOCK2 OSTF1 DYSF GNS RPS6 PRCP PFKL ILF2 HSPD1 CCT8 PSMC2 AGL PSMD6 PRKCD PSMC3 PGM2 RNASE3 GUSB PA2G4 FPR1 OLR1 P…
2.55270362592599e-22	87	843	3.50327414643909	Leukocyte activation involved in immune response	http://amigo.geneontology.org/amigo/term/GO:0002366	FGR PGLYRP1 PLAUR MVP RNASET2 GRN CYBA HEBP2 CNN2 KARS1 RHOA ROCK1 IFI35 KCNAB2 RAB27A STK10 STXBP2 XRCC5 CD59 CPNE3 MAPK1 PYGB CTSZ VAPA OLFM4 MAN2B1 RAB3D RAB5C VAT1 LAMTOR3 NFKB1 MANBA CTSC CAND1 PADI2 RAB14 ADGRE5 NCKAP1L NMI SERPINB6 FGL2 SIGLEC9 DIAPH1 CHI3L1 CHIT1 SWAP70 AMPD3 DOCK2 OSTF1 DYSF GNS RPS6 PRCP PFKL ILF2 HSPD1 CCT8 PSMC2 AGL PSMD6 PRKCD PSMC3 PGM2 RNASE3 GUSB PA2G4 FPR1 OLR1 P…
9.95724857070391e-09	86	1404	2.07928389387089	Response to cytokine	http://amigo.geneontology.org/amigo/term/GO:0034097	GCLC PAFAH1B1 WAS GCLM CYBA CUL1 CNN2 RHOA IFI35 UBE2K XRCC5 PSMD5 PSMD8 MTAP CRKL MAPK1 PSMC6 PSMB5 PSMD10 CSK CAV1 PPP3CB NFKB1 PSMD9 SRSF3 SKP1 PDCD10 IL1R2 RO60 PADI2 GBP1 IFIT2 NMI PSMB2 TXNDC17 AKAP12 CHI3L1 IL6ST SYNCRIP DHX9 CASP1 ATIC PML HDGF HSPD1 CAMK2D RPS3 PSMC2 GBP2 CAPN2 IFI16 PSMD6 PF4 PRKCD PSMC3 STX3 OTUB1 FASN KRT8 KIF5B FPR1 IL16 OXSR1 PSMD1 PITPNA GRB2 PTPN11 HCLS1 PAK2 BOLA…
4.72625396662295e-10	86	1318	2.21495795674866	Cellular protein-containing complex assembly	http://amigo.geneontology.org/amigo/term/GO:0034622	WAS CYBA EIF4B RHOA UBE2K XRCC5 DNM2 RPS5 EPS15 FKBP1A PSMD5 PSMD8 ATP5F1D SF3A1 SNRPD3 PSMC6 PSMB5 MAPRE1 CHMP4B PSMD10 NAPA MTPN EIF3B EIF3A CRYAB PSMD9 PTGES3 CAND1 CPSF6 CLINT1 RTN4 STMN1 CASQ2 CLTA NCKAP1L EML2 SNRPB PSMB2 CHMP2A CLIP1 DIAPH1 DHX9 ARPC5L NUMA1 RDX TMOD3 DENR HSPD1 COPS7B LUC7L2 ADD3 RPS3 VBP1 AIFM1 PSMC2 AP2M1 RBBP4 PSMD6 PRKCD HMGB2 PSMC3 DDB1 UQCRFS1 CORO1B PSMD1 TCAP EIF3…
0.00476508598767962	85	1997	1.44485181198863	Cell cycle	http://amigo.geneontology.org/amigo/term/GO:0007049	PAFAH1B1 CUL3 CUL1 IPO5 RHOA ROCK1 STK10 TSG101 DYNC1I2 DNM2 XPO1 CHMP5 NSFL1C NUDC PSMD5 PSMD8 RANBP1 MAPK1 SUN2 PSMC6 PSMB5 MAPRE1 RPRD1B CHMP4B PSMD10 UBE2I PPP2R1A SMC3 PRKAR1A PSMD9 SKP1 GNAI2 STMN1 PTPA CBX3 CLTA SEPTIN6 PSMB2 CHMP2A CLIP1 RAN MYH10 RPS6 NUMA1 RDX TMOD3 SEPTIN11 PML TIPRL LBR RPS3 EIF4E EPB41 CALM3 PSMC2 RBBP4 PSMD6 PRKCD PSMC3 DDB1 PRNP PPP1CA PSMD1 CRLF3 RAD23A PTPN11 SEP…
0.00227611662434621	85	1940	1.48730364357799	Negative regulation of response to stimulus	http://amigo.geneontology.org/amigo/term/GO:0048585	FGR GCLC PAFAH1B1 PGLYRP1 PLAUR DCN MVP GCLM GRN CUL3 LTBP1 RHOA IFI35 VPS35 TSG101 DNM2 CD59 EPS15 FKBP1A PSMD5 PSMD8 SH3BP1 PSMC6 PSMB5 USP14 PSMD10 CSK STK3 PPP2CB PPP2R1A CAV1 SFRP4 EIF3A PPP3CB PRKAR1A NFKB1 PSMD9 PRKAR2A GNAI2 IL1R2 PLEK PADI2 GBP1 STMN1 NMI PSMB2 EPS15L1 FGL2 SPINK5 IL6ST RADX RPS3 TKFC VSIG4 PSMC2 IFI16 PSMD6 PF4 PRKCD HMGB2 PSMC3 FBN1 ACAA2 OTUB1 SERPINB9 RGS19 PRNP CORO…
0.000447833340536954	85	1832	1.57498311601599	Response to oxygen-containing compound	http://amigo.geneontology.org/amigo/term/GO:1901700	GCLC NADK DCN GCLM H6PD CYBA IPO5 RHOA ROCK1 VPS35 XRCC5 DNM2 AKR1B1 CHMP5 DPYSL2 MTAP RANBP1 CRKL MAPK1 STK24 CSK PPP2CB CAV1 PPP3CB PRKAR1A LAMTOR3 NFKB1 CRYAB DCPS PDCD10 PRKAR2A GNAI2 ATP6V1A SRSF4 ADPRS IDE GOT2 ATP6V1F CSRP3 AKAP12 LAMTOR5 GLUL CASP1 USO1 HADH ESD PFKL HSPD1 PAM RPS3 EIF4E QDPR IMPACT AIFM1 CALM3 CAPN2 PF4 PRKCD H2AZ1 HMGB2 FBN1 KRT8 KIF5B RGS19 PRNP DAG1 CCS TRIM72 GRB2 PT…
4.22947327133253e-23	85	785	3.67562938667682	Myeloid leukocyte activation	http://amigo.geneontology.org/amigo/term/GO:0002274	FGR PGLYRP1 PLAUR MVP RNASET2 GRN CYBA HEBP2 CNN2 KARS1 RHOA ROCK1 IFI35 KCNAB2 RAB27A STK10 STXBP2 XRCC5 CD59 CPNE3 MAPK1 PYGB CTSZ VAPA OLFM4 MAN2B1 RAB3D RAB5C VAT1 LAMTOR3 NFKB1 MANBA CTSC CAND1 PADI2 RAB14 ADGRE5 NCKAP1L NMI SERPINB6 FGL2 SIGLEC9 DIAPH1 CHI3L1 CHIT1 AMPD3 DOCK2 OSTF1 DYSF GNS PRCP PFKL ILF2 HSPD1 VSIG4 CCT8 PSMC2 AGL PSMD6 PRKCD PSMC3 PGM2 RNASE3 GUSB PA2G4 FPR1 OLR1 PSMD1 R…
0.000818098844209652	84	1842	1.54800409885335	Positive regulation of signaling	http://amigo.geneontology.org/amigo/term/GO:0023056	FGR PAFAH1B1 NADK PLAUR DCN CYBA RHOA ROCK1 IFI35 VPS35 UBE2K AKR1B1 EPS15 FKBP1A PSMD5 PSMD8 CRKL MAPK1 PSMC6 PSMB5 C20orf27 VAPA PSMD10 UBE2I CSK STK3 CAV1 SFRP4 PPP3CB LAMTOR3 NFKB1 CTSC PSMD9 PDCD10 GNAI2 TFG RTN4 NMI NQO2 PSMB2 AKAP12 CHI3L1 LAMTOR5 IL6ST GLUL NUMA1 CASP1 MAPK8IP3 PML RPS3 PFKM RNF111 PSMC2 PSMD6 PRKCD PSMC3 STX3 KLK6 MAP2K1 KIF5B PRNP PPP1CA PSMD1 CRLF3 RHOG GRB2 PTPN11 HCL…
1.96373424928831e-09	84	1308	2.17998742361458	Cellular response to cytokine stimulus	http://amigo.geneontology.org/amigo/term/GO:0071345	PAFAH1B1 WAS GCLM CYBA CUL1 CNN2 RHOA IFI35 UBE2K XRCC5 PSMD5 PSMD8 MTAP CRKL MAPK1 PSMC6 PSMB5 PSMD10 CSK CAV1 NFKB1 PSMD9 SRSF3 SKP1 PDCD10 IL1R2 RO60 PADI2 GBP1 IFIT2 NMI PSMB2 TXNDC17 AKAP12 CHI3L1 IL6ST SYNCRIP DHX9 CASP1 ATIC PML HDGF HSPD1 CAMK2D RPS3 PSMC2 GBP2 CAPN2 IFI16 PSMD6 PF4 PRKCD PSMC3 STX3 OTUB1 FASN KRT8 KIF5B FPR1 IL16 OXSR1 PSMD1 PITPNA GRB2 PTPN11 HCLS1 PAK2 BOLA2 GBP6 H3C13…
1.06816370447385e-26	83	652	4.32128532459271	Myeloid cell activation involved in immune response	http://amigo.geneontology.org/amigo/term/GO:0002275	FGR PGLYRP1 PLAUR MVP RNASET2 GRN CYBA HEBP2 CNN2 KARS1 RHOA ROCK1 IFI35 KCNAB2 RAB27A STK10 STXBP2 XRCC5 CD59 CPNE3 MAPK1 PYGB CTSZ VAPA OLFM4 MAN2B1 RAB3D RAB5C VAT1 LAMTOR3 NFKB1 MANBA CTSC CAND1 PADI2 RAB14 ADGRE5 NCKAP1L NMI SERPINB6 FGL2 SIGLEC9 DIAPH1 CHI3L1 CHIT1 AMPD3 DOCK2 OSTF1 DYSF GNS PRCP PFKL ILF2 CCT8 PSMC2 AGL PSMD6 PRKCD PSMC3 PGM2 RNASE3 GUSB PA2G4 FPR1 OLR1 PSMD1 RAB6A DPP7 RH…
0.00171266977080358	82	1835	1.51691145132481	Positive regulation of cell communication	http://amigo.geneontology.org/amigo/term/GO:0010647	FGR PAFAH1B1 NADK PLAUR DCN CYBA RHOA ROCK1 IFI35 VPS35 UBE2K AKR1B1 FKBP1A PSMD5 PSMD8 CRKL MAPK1 PSMC6 PSMB5 C20orf27 VAPA PSMD10 UBE2I CSK STK3 CAV1 SFRP4 PPP3CB LAMTOR3 NFKB1 CTSC PSMD9 PDCD10 GNAI2 TFG RTN4 NMI NQO2 PSMB2 AKAP12 CHI3L1 LAMTOR5 IL6ST GLUL NUMA1 CASP1 MAPK8IP3 PML RPS3 PFKM RNF111 PSMC2 PSMD6 PRKCD PSMC3 STX3 KLK6 MAP2K1 KIF5B PRNP PPP1CA PSMD1 CRLF3 RHOG GRB2 PTPN11 HCLS1 PAK…
0.00060479467656425	82	1769	1.57350622565349	Response to endogenous stimulus	http://amigo.geneontology.org/amigo/term/GO:0009719	GCLC GCLM LTBP1 CYBA IPO5 RHOA ROCK1 VPS35 DNM2 AKR1B1 CHMP5 FKBP1A LTBP4 CRKL MAPK1 DDX17 C20orf27 CSK CAV1 SFRP4 PRKAR1A LAMTOR3 NFKB1 EHD1 SCGB2A2 PTGES3 PRKAR2A GNAI2 ATP6V1A SRSF4 PADI2 CASQ2 RAB14 LTBP2 IDE UFM1 GOT2 ATP6V1F CSRP3 DIAPH1 LAMTOR5 HNRNPA1 NUMA1 PRCP RDX USO1 HADH SORD PML HSPD1 PAM EIF4E QDPR IMPACT AIFM1 RNF111 CALM3 AGL CAPN2 PRKCD HMGB2 FBN1 SERPINB9 PRNP CORO1B DAG1 TRIM7…
0.0156455493769514	81	1982	1.38727900843975	Locomotion	http://amigo.geneontology.org/amigo/term/GO:0040011	FGR PAFAH1B1 PLAUR DCN WAS GRN CUL3 CNN2 SLK RHOA ROCK1 STK10 CPNE3 ARHGAP4 DPYSL2 CRKL MAPK1 PPM1F SH3BP1 SUN2 MAPRE1 USP14 STK24 CAV1 PPP3CB ATP5F1B PDCD10 GNAI2 RTN4 DNAH6 PADI2 NCKAP1L AKAP12 DIAPH1 SWAP70 DOCK2 GLUL GYPC ARPC5L PRCP RDX SORD PML MIEN1 ATP5F1A DPYSL5 PF4 PRKCD HMGB2 CFL2 STX3 MAP2K1 RNASE3 ALCAM KIF5B FPR1 LAMB2 IL16 CORO1B OXSR1 OLR1 DAG1 RHOG GRB2 PTPN11 IDH2 FMNL1 HMGB1 CD…
0.00689021527944942	81	1911	1.43882103334777	Homeostatic process	http://amigo.geneontology.org/amigo/term/GO:0042592	GCLC NADK DCN GCLM GRN CYBA CUL1 UBE2K AKR1B1 FKBP1A DLD FH MAPK1 NCF4 CHMP4B CSK RAB3D CAV1 SFRP4 PPP3CB GLRX3 PRKAR1A EHD1 ATP5F1B CAND1 SKP1 PRKAR2A GNAI2 ATP6V1A RTN4 NCF2 STMN1 CASQ2 IDE NCKAP1L ATP6V1F CSRP3 DIAPH1 SWAP70 RPS6 PRCP TMOD3 HADH PML TMCO1 SNAPIN CAMK2D PFKM CALM3 ASGR2 PM20D1 HMGB2 CFL2 DDB1 AHSP KIF5B FPR1 PRNP PTPN11 HCLS1 BOLA2 CYP4F2 ISG15 HMGB1 ATP2A1 DYNC1H1 ERO1A PLCG2 …
0.000422853087141742	80	1691	1.60593818821654	Regulation of response to stress	http://amigo.geneontology.org/amigo/term/GO:0080134	FGR PAFAH1B1 PGLYRP1 PLAUR WAS GRN CYBA CUL1 KARS1 IFI35 VPS35 UBE2K XRCC5 TMED2 ERP29 PSMD5 PSMD8 MAPK1 PSMC6 PSMB5 USP14 PSMD10 STK24 STK3 CAV1 PRKAR1A NFKB1 CRYAB CTSC PSMD9 PTGES3 SKP1 PDCD10 PRKAR2A LANCL1 NMI PSMB2 FGL2 ALOX5AP SPINK5 IL6ST DHX9 CASP1 MAPK8IP3 PML HSPD1 CAMK2D RADX RPS3 TKFC VSIG4 PSMC2 IFI16 PSMD6 PRKCD HMGB2 ERAP1 PSMC3 OTUB1 MAP2K1 SERPINB9 IL16 PSMD1 PTPN11 PAK2 ISG15 H…
7.70960413392338e-06	80	1500	1.81042765084944	Organonitrogen compound catabolic process	http://amigo.geneontology.org/amigo/term/GO:1901565	GCLC PGLYRP1 DCN CUL3 CUL1 ROCK1 VPS35 TSG101 UBE2K XPO1 NSFL1C DLD PSMD5 PSMD8 PSMC6 PSMB5 CTSZ EEF1A2 CHMP4B USP14 PSMD10 UBE2I PPP2CB CAV1 BLVRA ERLIN1 NAGLU MANBA CTSC PSMD9 USP5 SNX3 GNPDA1 SKP1 UCHL3 IDE CLTA GOT2 PSMB2 CHI3L1 CHIT1 AMPD3 GNS GLUL RDX PML ALDH1L1 QDPR RNF111 PSMC2 AP2M1 CAPN2 PSMD6 PRKCD ERAP1 PSMC3 DDB1 HINT1 GUSB PSMD1 TRIM72 RAD23A UBA7 BGN UPP1 UBE2L3 ISG15 PRELP SF3B3 …
9.47681885391715e-25	80	660	4.1146082973851	Myeloid leukocyte mediated immunity	http://amigo.geneontology.org/amigo/term/GO:0002444	FGR PGLYRP1 PLAUR MVP RNASET2 GRN CYBA HEBP2 CNN2 RHOA ROCK1 KCNAB2 RAB27A STK10 STXBP2 XRCC5 CD59 CPNE3 MAPK1 PYGB CTSZ VAPA OLFM4 MAN2B1 RAB3D RAB5C VAT1 LAMTOR3 NFKB1 MANBA CTSC CAND1 PADI2 RAB14 ADGRE5 NCKAP1L SERPINB6 FGL2 SIGLEC9 DIAPH1 CHI3L1 CHIT1 AMPD3 DOCK2 OSTF1 GNS PRCP PFKL ILF2 CCT8 PSMC2 AGL PSMD6 PRKCD PSMC3 PGM2 RNASE3 GUSB PA2G4 SERPINB9 FPR1 OLR1 PSMD1 RAB6A DPP7 RHOG ARHGAP45 …
6.32552955176104e-25	79	639	4.19670728923433	Leukocyte degranulation	http://amigo.geneontology.org/amigo/term/GO:0043299	FGR PGLYRP1 PLAUR MVP RNASET2 GRN CYBA HEBP2 CNN2 RHOA ROCK1 KCNAB2 RAB27A STK10 STXBP2 XRCC5 CD59 CPNE3 MAPK1 PYGB CTSZ VAPA OLFM4 MAN2B1 RAB3D RAB5C VAT1 LAMTOR3 NFKB1 MANBA CTSC CAND1 PADI2 RAB14 ADGRE5 NCKAP1L SERPINB6 FGL2 SIGLEC9 DIAPH1 CHI3L1 CHIT1 AMPD3 DOCK2 OSTF1 GNS PRCP PFKL ILF2 CCT8 PSMC2 AGL PSMD6 PRKCD PSMC3 PGM2 RNASE3 GUSB PA2G4 FPR1 OLR1 PSMD1 RAB6A DPP7 RHOG ARHGAP45 TUBB4B HM…
2.98492457256739e-26	79	606	4.42524085448967	Granulocyte activation	http://amigo.geneontology.org/amigo/term/GO:0036230	FGR PGLYRP1 PLAUR MVP RNASET2 GRN CYBA HEBP2 CNN2 KARS1 RHOA ROCK1 KCNAB2 RAB27A STK10 STXBP2 XRCC5 CD59 CPNE3 MAPK1 PYGB CTSZ VAPA OLFM4 MAN2B1 RAB3D RAB5C VAT1 LAMTOR3 NFKB1 MANBA CTSC CAND1 PADI2 RAB14 ADGRE5 NCKAP1L SERPINB6 FGL2 SIGLEC9 DIAPH1 CHI3L1 CHIT1 AMPD3 DOCK2 OSTF1 GNS PRCP PFKL ILF2 CCT8 PSMC2 AGL PSMD6 PRKCD PSMC3 PGM2 RNASE3 GUSB PA2G4 FPR1 OLR1 PSMD1 RAB6A DPP7 RHOG ARHGAP45 TUB…
8.77644627510803e-05	78	1553	1.70492623268983	Cytoskeleton organization	http://amigo.geneontology.org/amigo/term/GO:0007010	PAFAH1B1 WAS EHD2 CUL3 CNN2 SLK RHOA ROCK1 DYNC1I2 XPO1 CHMP5 NSFL1C ARHGAP4 NUDC DPYSL2 RANBP1 MAPK1 PPM1F SH3BP1 SUN2 MAPRE1 CHMP4B TNNT1 MTPN SMC3 PRKAR1A MYH3 CRYAB PLEK STMN1 PTPA NCKAP1L EML2 CSRP3 CHMP2A CLIP1 DIAPH1 RAN MYH10 SWAP70 DOCK2 ARPC5L NUMA1 RDX TMOD3 MYO1F PFDN2 PAM ADD3 RPS3 PDLIM3 EPB41 CAPN2 PRKCD CFL2 KRT8 CORO1B DAG1 TCAP RHOG GRB2 HCLS1 PAK2 FHL3 FMNL1 KRT76 TUBB4B CD47 P…
4.02433046165925e-26	78	597	4.43509286326183	Neutrophil activation	http://amigo.geneontology.org/amigo/term/GO:0042119	FGR PGLYRP1 PLAUR MVP RNASET2 GRN CYBA HEBP2 CNN2 RHOA ROCK1 KCNAB2 RAB27A STK10 STXBP2 XRCC5 CD59 CPNE3 MAPK1 PYGB CTSZ VAPA OLFM4 MAN2B1 RAB3D RAB5C VAT1 LAMTOR3 NFKB1 MANBA CTSC CAND1 PADI2 RAB14 ADGRE5 NCKAP1L SERPINB6 FGL2 SIGLEC9 DIAPH1 CHI3L1 CHIT1 AMPD3 DOCK2 OSTF1 GNS PRCP PFKL ILF2 CCT8 PSMC2 AGL PSMD6 PRKCD PSMC3 PGM2 RNASE3 GUSB PA2G4 FPR1 OLR1 PSMD1 RAB6A DPP7 RHOG ARHGAP45 TUBB4B HM…
3.05791574455347e-26	78	593	4.46500917262616	Neutrophil mediated immunity	http://amigo.geneontology.org/amigo/term/GO:0002446	FGR PGLYRP1 PLAUR MVP RNASET2 GRN CYBA HEBP2 CNN2 RHOA ROCK1 KCNAB2 RAB27A STK10 STXBP2 XRCC5 CD59 CPNE3 MAPK1 PYGB CTSZ VAPA OLFM4 MAN2B1 RAB3D RAB5C VAT1 LAMTOR3 NFKB1 MANBA CTSC CAND1 PADI2 RAB14 ADGRE5 NCKAP1L SERPINB6 FGL2 SIGLEC9 DIAPH1 CHI3L1 CHIT1 AMPD3 DOCK2 OSTF1 GNS PRCP PFKL ILF2 CCT8 PSMC2 AGL PSMD6 PRKCD PSMC3 PGM2 RNASE3 GUSB PA2G4 FPR1 OLR1 PSMD1 RAB6A DPP7 RHOG ARHGAP45 TUBB4B HM…
1.79562312452407e-26	78	584	4.53381924549197	Neutrophil activation involved in immune response	http://amigo.geneontology.org/amigo/term/GO:0002283	FGR PGLYRP1 PLAUR MVP RNASET2 GRN CYBA HEBP2 CNN2 RHOA ROCK1 KCNAB2 RAB27A STK10 STXBP2 XRCC5 CD59 CPNE3 MAPK1 PYGB CTSZ VAPA OLFM4 MAN2B1 RAB3D RAB5C VAT1 LAMTOR3 NFKB1 MANBA CTSC CAND1 PADI2 RAB14 ADGRE5 NCKAP1L SERPINB6 FGL2 SIGLEC9 DIAPH1 CHI3L1 CHIT1 AMPD3 DOCK2 OSTF1 GNS PRCP PFKL ILF2 CCT8 PSMC2 AGL PSMD6 PRKCD PSMC3 PGM2 RNASE3 GUSB PA2G4 FPR1 OLR1 PSMD1 RAB6A DPP7 RHOG ARHGAP45 TUBB4B HM…
1.06816370447385e-26	78	576	4.59678895723492	Neutrophil degranulation	http://amigo.geneontology.org/amigo/term/GO:0043312	FGR PGLYRP1 PLAUR MVP RNASET2 GRN CYBA HEBP2 CNN2 RHOA ROCK1 KCNAB2 RAB27A STK10 STXBP2 XRCC5 CD59 CPNE3 MAPK1 PYGB CTSZ VAPA OLFM4 MAN2B1 RAB3D RAB5C VAT1 LAMTOR3 NFKB1 MANBA CTSC CAND1 PADI2 RAB14 ADGRE5 NCKAP1L SERPINB6 FGL2 SIGLEC9 DIAPH1 CHI3L1 CHIT1 AMPD3 DOCK2 OSTF1 GNS PRCP PFKL ILF2 CCT8 PSMC2 AGL PSMD6 PRKCD PSMC3 PGM2 RNASE3 GUSB PA2G4 FPR1 OLR1 PSMD1 RAB6A DPP7 RHOG ARHGAP45 TUBB4B HM…
0.00144757968515391	77	1684	1.55214068937879	Regulation of programmed cell death	http://amigo.geneontology.org/amigo/term/GO:0043067	GCLC HSPB6 PLAUR GCLM GRN SLK RHOA ARHGEF1 DNM2 AKR1B1 ERP29 SPTLC1 MAPK1 CTSZ EEF1A2 PSMD10 STK3 CAV1 SFRP4 NFKB1 CRYAB CTSC DCPS PDCD10 GNAI2 GBE1 RTN4 LANCL1 PTPA IFIT2 UFM1 NCKAP1L NQO2 GLO1 AKAP12 EIF2S1 LAMTOR5 IL6ST RPS6 CASP1 PML MIEN1 ANP32E HSPD1 CAMK2D TIAM2 RPS3 AIFM1 CAPN2 PF4 PRKCD HMGB2 API5 ACAA2 DDB1 PA2G4 SERPINB9 PRNP PPP1CA TNFRSF10C HCLS1 PAK2 EVI2B BCL2L15 HMGB1 NACA SERPINB…
0.00682705102448516	75	1738	1.46485263751843	Regulation of cell differentiation	http://amigo.geneontology.org/amigo/term/GO:0045595	PAFAH1B1 PGLYRP1 GRN RHOA ROCK1 XRCC5 DNM2 AAMDC ARHGAP4 LTBP4 DPYSL2 PSMD5 PSMD8 CRKL MAPK1 DDX17 PSMC6 PSMB5 PSMD10 OLFM4 STK3 PPP2R1A CAV1 SFRP4 NFKB1 PSMD9 RTN4 GBP1 NCKAP1L PSMB2 KRT36 FGL2 CSRP3 SPINK5 IL6ST NUMA1 MAPK8IP3 TIAM2 ADIRF EIF4E IMPACT PSMC2 PSMD6 PF4 HMGB2 PSMC3 FBN1 KLK6 MAP2K1 PA2G4 DAG1 PSMD1 TRIM72 PTPN11 HCLS1 IDH2 H3C13 EVI2B NAP1L1 ISG15 HMGB1 NACA PDLIM7 PSMD12 SERPINB1…
0.00170431618839949	75	1639	1.55333366931484	Regulation of apoptotic process	http://amigo.geneontology.org/amigo/term/GO:0042981	GCLC HSPB6 PLAUR GCLM GRN SLK RHOA ARHGEF1 DNM2 AKR1B1 ERP29 SPTLC1 MAPK1 CTSZ EEF1A2 PSMD10 STK3 CAV1 SFRP4 NFKB1 CRYAB CTSC PDCD10 GNAI2 GBE1 RTN4 LANCL1 PTPA IFIT2 UFM1 NCKAP1L NQO2 GLO1 AKAP12 EIF2S1 LAMTOR5 IL6ST RPS6 CASP1 PML MIEN1 ANP32E HSPD1 CAMK2D TIAM2 RPS3 AIFM1 CAPN2 PF4 PRKCD HMGB2 API5 ACAA2 DDB1 PA2G4 SERPINB9 PRNP PPP1CA TNFRSF10C HCLS1 PAK2 EVI2B BCL2L15 HMGB1 NACA SERPINB13 TG…
2.37807579970145e-05	75	1418	1.79542587024473	Regulation of hydrolase activity	http://amigo.geneontology.org/amigo/term/GO:0051336	PAFAH1B1 PLAUR GRN IPO5 RHOA ROCK1 ARHGEF1 LXN TMED2 FKBP1A ARHGAP4 RANBP1 CRKL PPM1F SH3BP1 AHSA1 USP14 RP2 PPP6R1 NAPA PPP2R1A CAV1 CRYAB GNAI2 HSPE1 PPP1R7 PLEK STMN1 FKBP15 PTPA NCKAP1L SERPINB6 SPINK5 EIF2S1 LAMTOR5 DOCK2 RDX CASP1 PML TIPRL HSPD1 CAMK2D TIAM2 RSU1 RPS3 ASAP1 AIFM1 CALM3 IFI16 PRKCD HMGB2 WFDC12 GPS1 SERPINB9 PRNP ARHGAP1 RHOG PAK2 ARHGAP45 HMGB1 MYH6 SERPINB13 PSAP TGM2 GDI…
6.87123882377441e-06	75	1368	1.86104816082385	Cellular macromolecule catabolic process	http://amigo.geneontology.org/amigo/term/GO:0044265	GCLC RNASET2 CUL3 CUL1 ROCK1 VPS35 TSG101 UBE2K XPO1 RPS5 NSFL1C HNRNPC PSMD5 PSMD8 PSMC6 PSMB5 CTSZ CHMP4B USP14 PSMD10 UBE2I PPP2CB PPP2R1A CAV1 ERLIN1 MANBA CTSC DCPS PSMD9 USP5 RPS12 SKP1 UCHL3 IDE CLTA PSMB2 SYNCRIP DHX9 RPL35 RPS6 RDX SSB PML RPS8 RPS3 AIFM1 RNF111 PSMC2 AP2M1 CAPN2 PSMD6 PRKCD HMGB2 PSMC3 DDB1 RNASE3 PSMD1 TRIM72 RAD23A UBA7 UBE2L3 ISG15 H1-0 HMGB1 AP2A1 SND1 PSMD12 DDI2 R…
0.000247433711065142	74	1499	1.67576275220387	Defense response to other organism	http://amigo.geneontology.org/amigo/term/GO:0098542	FGR PGLYRP1 STAB1 WAS RNASET2 GRN CYBA CUL1 IFI35 RAB27A UBE2K XRCC5 PSMD5 PSMD8 DDX17 PSMC6 PSMB5 USP14 PSMD10 NFKB1 PSMD9 SKP1 NCF2 GBP1 RAB14 IFIT2 NMI PSMB2 FGL2 BPIFA2 SPINK5 SYNCRIP DHX9 CASP1 PML CAMK2D TKFC VSIG4 PSMC2 GBP2 IFI16 PSMD6 PF4 PRKCD HMGB2 ERAP1 RNASE7 PSMC3 WFDC12 RNASE3 SERPINB9 KIF5B PSMD1 PTPN11 PAK2 GBP6 ISG15 TUBB4B HMGB1 CD47 PSMD12 GZMM MYO1C PLCG2 BPIFA1 IPO7 IFI30 TU…
0.000206108087197666	74	1488	1.68815078330215	Regulation of immune response	http://amigo.geneontology.org/amigo/term/GO:0050776	FGR PGLYRP1 WAS GRN CYBA CUL1 KARS1 IFI35 STXBP2 UBE2K XRCC5 FYB1 CD59 FKBP1A PSMD5 PSMD8 CRKL MAPK1 PSMC6 PSMB5 PSMD10 CSK CLC CAV1 PPP3CB PRKAR1A NFKB1 PSMD9 SKP1 PRKAR2A RTN4 GBP1 NCKAP1L NMI PSMB2 FGL2 SIGLEC9 SPINK5 IL6ST DHX9 PML HSPD1 RPS3 TKFC VSIG4 ICOSLG S100A1 PSMC2 IFI16 PSMD6 PRKCD HMGB2 ERAP1 PSMC3 SERPINB9 FPR1 PRNP PSMD1 GRB2 PTPN11 PAK2 ISG15 HMGB1 CD47 PSMD12 MYO1C PLCG2 FCGR3A …
0.00415148962129194	73	1644	1.50731316733587	Positive regulation of signal transduction	http://amigo.geneontology.org/amigo/term/GO:0009967	FGR PAFAH1B1 PLAUR DCN CYBA RHOA ROCK1 IFI35 VPS35 UBE2K AKR1B1 FKBP1A PSMD5 PSMD8 CRKL PSMC6 PSMB5 C20orf27 VAPA PSMD10 UBE2I CSK STK3 CAV1 SFRP4 LAMTOR3 NFKB1 CTSC PSMD9 PDCD10 GNAI2 TFG RTN4 NMI NQO2 PSMB2 AKAP12 CHI3L1 LAMTOR5 IL6ST NUMA1 CASP1 MAPK8IP3 PML RPS3 RNF111 PSMC2 PSMD6 PRKCD PSMC3 KLK6 MAP2K1 PPP1CA PSMD1 CRLF3 RHOG GRB2 PTPN11 HCLS1 PAK2 HMGB1 PSMD12 MYO1C TGM2 RACK1 FIS1 LYN ITG…
9.005150569555e-06	73	1329	1.86457701060961	Response to abiotic stimulus	http://amigo.geneontology.org/amigo/term/GO:0009628	GCLC DCN CYBA CNN2 KARS1 RHOA XRCC5 LXN DNM2 AKR1B1 PSMD5 PSMD8 MAPK1 PSMC6 PSMB5 EEF1A2 PSMD10 MTPN CAV1 NFKB1 CRYAB TMEM109 PSMD9 PTGES3 ATP6V1A RTN4 RO60 SERPINB6 PSMB2 CSRP3 AKAP12 CHI3L1 EIF2S1 CASP1 SORD PML HSPD1 CAMK2D PAM ADIRF IMPACT AIFM1 ICOSLG PSMC2 LZIC CAPN2 IFI16 PSMD6 PRKCD PSMC3 ACAA2 DDB1 KRT8 PPP1CA OXSR1 DAG1 PSMD1 TCAP GRB2 PTPN11 COL18A1 ADSS1 PSMD12 SERPINB13 ERO1A FIS1 PD…
0.00060479467656425	72	1496	1.63374152984408	Cell cycle process	http://amigo.geneontology.org/amigo/term/GO:0022402	PAFAH1B1 CUL3 CUL1 RHOA ROCK1 DYNC1I2 DNM2 XPO1 CHMP5 NSFL1C NUDC PSMD5 PSMD8 RANBP1 SUN2 PSMC6 PSMB5 MAPRE1 RPRD1B CHMP4B PSMD10 UBE2I PPP2R1A SMC3 PRKAR1A PSMD9 SKP1 STMN1 PTPA CBX3 SEPTIN6 PSMB2 CHMP2A CLIP1 RAN MYH10 RPS6 NUMA1 RDX TMOD3 SEPTIN11 PML TIPRL LBR RPS3 EIF4E CALM3 PSMC2 RBBP4 PSMD6 PSMC3 DDB1 PSMD1 CRLF3 PTPN11 SEPTIN9 UBE2L3 TUBB4B DYNC1H1 SND1 PSMD12 PLCG2 DCTN1 MSH5 TUBB CHMP1…
0.000119460497557939	72	1409	1.73461840216235	Positive regulation of catalytic activity	http://amigo.geneontology.org/amigo/term/GO:0043085	FGR GCLM GRN CYBA RHOA ARHGEF1 XRCC5 ARHGAP4 RANBP1 CRKL MAPK1 PPM1F SH3BP1 AHSA1 EEF1A2 PSMD10 RP2 UBE2I CSK STK3 NAPA CAV1 PRKAR1A PTGES3 SKP1 PDCD10 PRKAR2A GNAI2 CCT4 HSPE1 PLEK PTPA NCKAP1L CHI3L1 DOCK2 DHX9 CASP1 PML HSPD1 TIAM2 RSU1 RPS3 ASAP1 AIFM1 CALM3 S100A1 IFI16 PRKCD HMGB2 MAP2K1 PRNP DAG1 MOB1B CCS ARHGAP1 RHOG PAK2 ARHGAP45 UBE2L3 HMGB1 PSAP TGM2 GDI1 RACK1 DNAJC9 FIS1 PDCD6 LYN I…
5.50449453919746e-06	72	1282	1.90645657460745	Regulation of response to external stimulus	http://amigo.geneontology.org/amigo/term/GO:0032101	FGR PGLYRP1 PLAUR GRN CYBA CUL1 KARS1 IFI35 VPS35 UBE2K XRCC5 PSMD5 PSMD8 MAPK1 PPM1F PSMC6 PSMB5 USP14 PSMD10 STK24 CAV1 PRKAR1A NFKB1 CTSC PSMD9 SKP1 PRKAR2A PADI2 NCKAP1L NMI PSMB2 FGL2 ALOX5AP SPINK5 SWAP70 IL6ST DHX9 CASP1 PML HSPD1 TKFC VSIG4 PSMC2 IFI16 PSMD6 PRKCD HMGB2 ERAP1 PSMC3 STX3 MAP2K1 SERPINB9 IL16 CORO1B OXSR1 PSMD1 PTPN11 PAK2 ISG15 HMGB1 CD47 PSMD12 PLCG2 TGM2 FCGR3A LYN PSMB3…
0.0215806706611001	70	1690	1.40602739156207	Cell projection organization	http://amigo.geneontology.org/amigo/term/GO:0030030	PAFAH1B1 WAS EHD2 GRN CUL3 RHOA ROCK1 VPS35 DYNC1I2 DNM2 ARHGAP4 DPYSL2 RANBP1 CRKL MAPK1 CTSZ MAPRE1 VAPA RP2 STK24 PPP2R1A CAV1 PPP3CB EHD1 SNX3 RTN4 PLEK RO60 STMN1 NCKAP1L RAB17 SEPTIN6 RDX MAPK8IP3 MIEN1 SNAPIN ATG3 TIAM2 ASAP1 IMPACT DPYSL5 PRKCD STX3 KLK6 MAP2K1 ALCAM KIF5B PRNP LAMB2 CORO1B DAG1 RHOG GRB2 PTPN11 PAK2 SEPTIN9 TUBB4B HMGB1 PDLIM7 AP2A1 DYNC1H1 GDI1 DCTN1 SNX2 TUBB NME1 LYN …
0.066279368342251	69	1776	1.31882926423788	Cell motility	http://amigo.geneontology.org/amigo/term/GO:0048870	FGR PAFAH1B1 DCN WAS GRN CUL3 CNN2 SLK RHOA ROCK1 STK10 CPNE3 ARHGAP4 CRKL MAPK1 PPM1F SH3BP1 SUN2 MAPRE1 STK24 CAV1 ATP5F1B PDCD10 GNAI2 RTN4 DNAH6 PADI2 NCKAP1L AKAP12 DIAPH1 SWAP70 GLUL GYPC ARPC5L PRCP RDX SORD PML MIEN1 ATP5F1A PF4 PRKCD HMGB2 CFL2 MAP2K1 LAMB2 IL16 CORO1B OXSR1 OLR1 DAG1 RHOG GRB2 PTPN11 IDH2 FMNL1 HMGB1 CD47 MYO1C PLCG2 RACK1 PDCD6 LYN BRK1 ITGB3 MIF PRTN3 GFUS RCC2
0.066279368342251	69	1776	1.31882926423788	Localization of cell	http://amigo.geneontology.org/amigo/term/GO:0051674	FGR PAFAH1B1 DCN WAS GRN CUL3 CNN2 SLK RHOA ROCK1 STK10 CPNE3 ARHGAP4 CRKL MAPK1 PPM1F SH3BP1 SUN2 MAPRE1 STK24 CAV1 ATP5F1B PDCD10 GNAI2 RTN4 DNAH6 PADI2 NCKAP1L AKAP12 DIAPH1 SWAP70 GLUL GYPC ARPC5L PRCP RDX SORD PML MIEN1 ATP5F1A PF4 PRKCD HMGB2 CFL2 MAP2K1 LAMB2 IL16 CORO1B OXSR1 OLR1 DAG1 RHOG GRB2 PTPN11 IDH2 FMNL1 HMGB1 CD47 MYO1C PLCG2 RACK1 PDCD6 LYN BRK1 ITGB3 MIF PRTN3 GFUS RCC2
0.0186351511611584	69	1649	1.42040071151393	Plasma membrane bounded cell projection organization	http://amigo.geneontology.org/amigo/term/GO:0120036	PAFAH1B1 WAS EHD2 GRN RHOA ROCK1 VPS35 DYNC1I2 DNM2 ARHGAP4 DPYSL2 RANBP1 CRKL MAPK1 CTSZ MAPRE1 VAPA RP2 STK24 PPP2R1A CAV1 PPP3CB EHD1 SNX3 RTN4 PLEK RO60 STMN1 NCKAP1L RAB17 SEPTIN6 RDX MAPK8IP3 MIEN1 SNAPIN ATG3 TIAM2 ASAP1 IMPACT DPYSL5 PRKCD STX3 KLK6 MAP2K1 ALCAM KIF5B PRNP LAMB2 CORO1B DAG1 RHOG GRB2 PTPN11 PAK2 SEPTIN9 TUBB4B HMGB1 PDLIM7 AP2A1 DYNC1H1 GDI1 DCTN1 SNX2 TUBB NME1 LYN BRK1 …
0.00640929023635307	69	1563	1.49855455744496	Positive regulation of protein metabolic process	http://amigo.geneontology.org/amigo/term/GO:0051247	GCLC PLAUR GRN CUL3 RHOA VPS35 UBE2K XRCC5 FKBP1A ERP29 CRKL MAPK1 PPM1F PSMC6 PSMD10 CSK STK3 MTPN CAV1 PRKAR1A CTSC USP5 SKP1 PDCD10 PRKAR2A HSPE1 PPP1R7 PTPA IDE NCKAP1L NMI UBA2 CHI3L1 IL6ST DHX9 NIBAN1 RDX CASP1 PML HSPD1 RPS3 IMPACT AIFM1 RNF111 CALM3 PSMC2 IFI16 PRKCD PSMC3 DDB1 MAP2K1 PRNP DAG1 RAD23A PTPN11 HCLS1 PAK2 UBE2L3 HMGB1 RACK1 FIS1 PDCD6 LYN ITGB3 NSF MIF PSMC4 PSME1 PRKACA
0.000103296976577988	69	1325	1.76772888549922	Negative regulation of gene expression	http://amigo.geneontology.org/amigo/term/GO:0010629	PGLYRP1 ROCK1 XPO1 RPS5 ERP29 HNRNPC PSMD5 PSMD8 CRKL DDX17 PSMC6 PSMB5 CTSZ PSMD10 NUTF2 CSK PPP2R1A NFKB1 CRYAB DCPS PSMD9 RPS12 PDCD10 IL1R2 SRSF4 TSNAX GBP1 SRGN NCKAP1L NMI PSMB2 RAN SPINK5 EIF2S1 SYNCRIP DHX9 RPL35 RPS6 SSB PML RPS8 SRP9 RPS3 EIF4E VSIG4 PSMC2 RBBP4 PSMD6 PRKCD HMGB2 PSMC3 MAP2K1 PRNP PSMD1 UBA7 H3C13 ISG15 HMGB1 SND1 PSMD12 RPL10A RACK1 TSN LSM2 NME1 PSMB3 MIF PSMC4 PSME1
7.70402900780248e-06	69	1222	1.91672731038172	Regulation of organelle organization	http://amigo.geneontology.org/amigo/term/GO:0033043	GCLC PAFAH1B1 PLAUR DCN WAS GRN CUL3 RHOA ROCK1 VPS35 TSG101 XRCC5 DNM2 CHMP5 HNRNPC MAPK1 PPM1F SH3BP1 MAPRE1 CHMP4B PSMD10 MTPN VAT1 PRKAR1A PDCD10 CCT4 PLEK STMN1 NCKAP1L EML2 CHMP2A CLIP1 DIAPH1 SWAP70 HNRNPA1 CCT7 ARPC5L NUMA1 RDX TMOD3 PML PFDN2 ATG3 PAM ADD3 RPS3 ASAP1 CCT8 CAPN2 CCT3 PRKCD CFL2 ACAA2 MAP2K1 KIF5B CORO1B RHOG GRB2 HCLS1 PAK2 SEPTIN9 CD47 DYNC1H1 MYO1C DCTN1 FIS1 BRK1 CHMP1…
0.00418226133424707	68	1505	1.53375099988906	Cellular response to endogenous stimulus	http://amigo.geneontology.org/amigo/term/GO:0071495	GCLC GCLM LTBP1 CYBA IPO5 RHOA ROCK1 VPS35 DNM2 AKR1B1 CHMP5 FKBP1A LTBP4 CRKL MAPK1 DDX17 C20orf27 CSK CAV1 SFRP4 PRKAR1A LAMTOR3 NFKB1 EHD1 SCGB2A2 PTGES3 PRKAR2A GNAI2 ATP6V1A PADI2 CASQ2 RAB14 LTBP2 IDE UFM1 ATP6V1F CSRP3 DIAPH1 LAMTOR5 HNRNPA1 NUMA1 PRCP RDX USO1 PML EIF4E IMPACT AIFM1 RNF111 CAPN2 PRKCD FBN1 SERPINB9 PRNP CORO1B TRIM72 GRB2 PTPN11 H3C13 UBE2L3 MYO1C APRT TGM2 FIS1 LYN PKLR …
6.85552532184761e-06	68	1192	1.93648930774584	Positive regulation of cellular component organization	http://amigo.geneontology.org/amigo/term/GO:0051130	PAFAH1B1 PLAUR DCN WAS EHD2 GRN CUL3 RHOA ROCK1 VPS35 TSG101 XRCC5 DNM2 RANBP1 MAPK1 PPM1F PSMC6 MAPRE1 CAV1 SFRP4 EHD1 CAND1 SNX3 CCT4 PLEK NCKAP1L CLIP1 SWAP70 HNRNPA1 CCT7 ARPC5L NUMA1 PML MIEN1 PFDN2 TIAM2 RPS3 ASAP1 CCT8 PSMC2 AP2M1 CAPN2 CCT3 CFL2 PSMC3 DDB1 MAP2K1 KIF5B CORO1B DAG1 GRB2 PTPN11 HCLS1 SEPTIN9 CD47 AP2A1 DYNC1H1 MYO1C PLCG2 GDI1 RACK1 DCTN1 FIS1 NME1 LYN BRK1 SCARF1 PSMC4
7.25126650300274e-05	67	1258	1.80790917041305	Innate immune response	http://amigo.geneontology.org/amigo/term/GO:0045087	FGR PGLYRP1 WAS RNASET2 GRN CYBA CUL1 IFI35 RAB27A UBE2K XRCC5 PSMD5 PSMD8 PSMC6 PSMB5 USP14 PSMD10 NFKB1 PSMD9 SKP1 NCF2 GBP1 IFIT2 NMI PSMB2 SYNCRIP DHX9 CASP1 PML CAMK2D TKFC VSIG4 PSMC2 GBP2 IFI16 PSMD6 PRKCD HMGB2 ERAP1 RNASE7 PSMC3 WFDC12 RNASE3 SERPINB9 KIF5B PSMD1 PTPN11 PAK2 GBP6 ISG15 TUBB4B HMGB1 CD47 PSMD12 GZMM MYO1C PLCG2 BPIFA1 IPO7 IFI30 TUBB LYN PSMB3 MIF PSMC4 PSME1 PRKACA
1.21027557142478e-05	67	1190	1.91121826586522	Positive regulation of immune system process	http://amigo.geneontology.org/amigo/term/GO:0002684	FGR WAS GRN CYBA CUL1 KARS1 RHOA IFI35 STXBP2 UBE2K XRCC5 FYB1 CD59 PSMD5 PSMD8 CRKL MAPK1 PSMC6 PSMB5 PSMD10 CSK CAV1 NFKB1 CTSC PSMD9 SKP1 RTN4 GBP1 NCKAP1L NMI PSMB2 SWAP70 IL6ST DHX9 HSPD1 RPS3 VSIG4 ICOSLG PSMC2 IFI16 PSMD6 PF4 PRKCD HMGB2 PSMC3 FPR1 PRNP OXSR1 PSMD1 GRB2 PTPN11 HCLS1 PAK2 EVI2B HMGB1 CD47 PSMD12 MYO1C PLCG2 FCGR3A LYN BRK1 PSMB3 MIF PSMC4 PSME1 PRKACA
0.0142249743007318	66	1540	1.4548079337183	Negative regulation of signaling	http://amigo.geneontology.org/amigo/term/GO:0023057	GCLC PAFAH1B1 PLAUR DCN MVP GCLM CUL3 LTBP1 RHOA IFI35 TSG101 DNM2 EPS15 FKBP1A PSMD5 PSMD8 SH3BP1 PSMC6 PSMB5 PSMD10 CSK STK3 PPP2CB PPP2R1A CAV1 SFRP4 EIF3A PSMD9 GNAI2 IL1R2 PLEK PADI2 GBP1 STMN1 NMI PSMB2 EPS15L1 IL6ST HADH PFKL TKFC PSMC2 PSMD6 PF4 PRKCD HMGB2 PSMC3 FBN1 ACAA2 RGS19 PRNP DAG1 PSMD1 TRIM72 GRB2 PTPN11 ISG15 CD47 PSMD12 RACK1 PDCD6 LYN PSMB3 MIF PSMC4 PSME1
0.0137276592391972	66	1537	1.45764750678347	Negative regulation of cell communication	http://amigo.geneontology.org/amigo/term/GO:0010648	GCLC PAFAH1B1 PLAUR DCN MVP GCLM CUL3 LTBP1 RHOA IFI35 TSG101 DNM2 EPS15 FKBP1A PSMD5 PSMD8 SH3BP1 PSMC6 PSMB5 PSMD10 CSK STK3 PPP2CB PPP2R1A CAV1 SFRP4 EIF3A PSMD9 GNAI2 IL1R2 PLEK PADI2 GBP1 STMN1 NMI PSMB2 EPS15L1 IL6ST HADH PFKL TKFC PSMC2 PSMD6 PF4 PRKCD HMGB2 PSMC3 FBN1 ACAA2 RGS19 PRNP DAG1 PSMD1 TRIM72 GRB2 PTPN11 ISG15 CD47 PSMD12 RACK1 PDCD6 LYN PSMB3 MIF PSMC4 PSME1
1.50355770446917e-07	66	1014	2.20947161531182	Membrane organization	http://amigo.geneontology.org/amigo/term/GO:0061024	GCLC PAFAH1B1 EHD2 CUL3 HEBP2 RHOA DNM2 CD59 EPS15 CHMP5 TMED2 NSFL1C ATP5F1D CRKL SH3BP1 SUN2 CTSZ CHMP4B VAPA EEA1 UBE2I PPP6R1 NAPA PPP2R1A CAV1 SYNGR2 CTSC ATP5F1B SNX3 TFG RTN4 PPP1R7 CLTA NCKAP1L EPS15L1 CSRP3 CHMP2A RAN DOCK2 DYSF USO1 SNAPIN LBR ATP5F1A ASAP1 ATP5MC3 CALM3 AP2M1 PRKCD STX3 ACAA2 CAVIN2 KIF5B PRNP PITPNA RHOG TRIM72 GRB2 FNBP1 AP2A1 GET3 DCTN1 PDCD6 CHMP1B NSF CHMP4A
0.0587434542161143	65	1644	1.34212816269633	Regulation of protein modification process	http://amigo.geneontology.org/amigo/term/GO:0031399	FGR GCLC PLAUR MVP CUL3 IPO5 RHOA ROCK1 TSG101 UBE2K XRCC5 TMED2 RTRAF FKBP1A ERP29 CRKL MAPK1 PPM1F PSMD10 UBE2I CSK STK3 PPP6R1 PPP2R1A CAV1 PRKAR1A SKP1 PDCD10 PRKAR2A GNAI2 PPP1R7 PTPA NCKAP1L NMI UBA2 CHI3L1 SWAP70 IL6ST NIBAN1 PML TIPRL CAMK2D RPS3 IMPACT RNF111 CALM3 PRKCD OTUB1 MAP2K1 PRNP DAG1 MOB1B PTPN11 HCLS1 PAK2 UBE2L3 ISG15 HMGB1 RACK1 IPO7 PDCD6 LYN ITGB3 MIF PRKACA
0.00821088762322978	65	1469	1.5020140908596	Positive regulation of cellular protein metabolic process	http://amigo.geneontology.org/amigo/term/GO:0032270	GCLC PLAUR GRN CUL3 RHOA VPS35 UBE2K XRCC5 FKBP1A ERP29 CRKL MAPK1 PPM1F PSMC6 PSMD10 CSK STK3 CAV1 PRKAR1A CTSC USP5 SKP1 PDCD10 PRKAR2A HSPE1 PPP1R7 PTPA NCKAP1L NMI UBA2 CHI3L1 IL6ST DHX9 NIBAN1 RDX CASP1 PML HSPD1 RPS3 IMPACT AIFM1 RNF111 CALM3 PSMC2 IFI16 PRKCD PSMC3 MAP2K1 PRNP DAG1 RAD23A PTPN11 HCLS1 PAK2 UBE2L3 HMGB1 RACK1 FIS1 PDCD6 LYN ITGB3 MIF PSMC4 PSME1 PRKACA
2.03333104276389e-05	65	1159	1.90376074156407	Organic acid metabolic process	http://amigo.geneontology.org/amigo/term/GO:0006082	GCLC GCLM HAGH KARS1 ST6GAL1 AKR1B1 DLD FH PSMD5 PSMD8 MTAP ACO2 PSMC6 PSMB5 PSMD10 SMS EARS2 CAV1 ERLIN1 MINPP1 PSMD9 PTGES3 GNPDA1 ABHD14B DARS1 ACAT2 GLO1 GOT2 PSMB2 ALOX5AP GSTM1 GLUL ATIC HADH SORD PFKL EPHX1 ALDH1L1 PAM QDPR PFKM CBR1 PSMC2 BPNT1 PM20D1 PSMD6 PSMC3 ACAA2 ECI1 FASN PSMD1 PPA1 IDH2 ADSS1 CYP4F2 PSMD12 ADH5 DDAH2 CES1 PKLR PSMB3 MIF PSMC4 PSME1 MSRA
1.03346341094434e-05	65	1135	1.9440164753064	Oxoacid metabolic process	http://amigo.geneontology.org/amigo/term/GO:0043436	GCLC GCLM HAGH KARS1 ST6GAL1 AKR1B1 DLD FH PSMD5 PSMD8 MTAP ACO2 PSMC6 PSMB5 PSMD10 SMS EARS2 CAV1 ERLIN1 MINPP1 PSMD9 PTGES3 GNPDA1 ABHD14B DARS1 ACAT2 GLO1 GOT2 PSMB2 ALOX5AP GSTM1 GLUL ATIC HADH SORD PFKL EPHX1 ALDH1L1 PAM QDPR PFKM CBR1 PSMC2 BPNT1 PM20D1 PSMD6 PSMC3 ACAA2 ECI1 FASN PSMD1 PPA1 IDH2 ADSS1 CYP4F2 PSMD12 ADH5 DDAH2 CES1 PKLR PSMB3 MIF PSMC4 PSME1 MSRA
0.0016860424133379	64	1337	1.62491636575866	Cellular amide metabolic process	http://amigo.geneontology.org/amigo/term/GO:0043603	GCLC GCLM EIF4B HAGH KARS1 RHOA ROCK1 ST6GAL1 RPS5 TMED2 SPTLC1 DLD MAPK1 CTSZ EEF1A2 EARS2 PPP2R1A MTPN EIF3B EIF3A DCPS RPS12 GNPDA1 RTN4 DARS1 IDE GLO1 CNDP2 RTN3 EIF2S1 GSTM1 SYNCRIP DHX9 NIBAN1 RPL35 RPS6 DENR PML RPS8 SRP9 ALDH1L1 PAM RPS3 EIF4E IMPACT EIF4A1 PM20D1 PRKCD ERAP1 FASN PA2G4 PRNP THOP1 PPP1CA EIF3F PPA1 NACA RPL10A RACK1 EIF3CL LSM2 CES1 EEF1D EEF1B2
2.96108357646621e-09	64	872	2.49141419841667	Regulation of cellular localization	http://amigo.geneontology.org/amigo/term/GO:0060341	FGR NADK EHD2 CYBA IPO5 KCNAB2 TSG101 STXBP2 XPO1 FKBP1A NSFL1C CRKL MAPK1 PPM1F NUTF2 CSK CAV1 PPP3CB CRYAB EHD1 CPSF6 SNX3 PDCD10 RTN4 CCT4 GBP1 CASQ2 UFM1 CSRP3 REEP5 DIAPH1 RAN LAMTOR5 CCT7 GLUL DHX9 NUMA1 RDX PML CAMK2D CCT8 EPB41 CALM3 AP2M1 CCT3 PRKCD STX3 MAP2K1 KIF5B PRNP DAG1 ARHGAP1 RHOG PTPN11 HCLS1 UBE2L3 ATP2A1 DYNC1H1 MYO1C GDI1 RACK1 FIS1 LYN PRKACA
0.0618534190148322	63	1590	1.34501110853202	Cell migration	http://amigo.geneontology.org/amigo/term/GO:0016477	FGR PAFAH1B1 DCN GRN CUL3 CNN2 SLK RHOA ROCK1 STK10 CPNE3 ARHGAP4 CRKL MAPK1 PPM1F SH3BP1 SUN2 MAPRE1 STK24 CAV1 ATP5F1B PDCD10 GNAI2 RTN4 PADI2 NCKAP1L AKAP12 DIAPH1 SWAP70 GLUL GYPC ARPC5L PRCP RDX PML MIEN1 ATP5F1A PF4 PRKCD HMGB2 LAMB2 IL16 CORO1B OXSR1 OLR1 DAG1 RHOG GRB2 PTPN11 IDH2 FMNL1 HMGB1 CD47 MYO1C PLCG2 RACK1 PDCD6 LYN ITGB3 MIF PRTN3 GFUS RCC2
0.00919925022702022	63	1421	1.50497372453618	Epithelium development	http://amigo.geneontology.org/amigo/term/GO:0060429	PAFAH1B1 RHOA ROCK1 TSG101 AKR1B1 TMED2 PSMD5 HNRNPH3 PSMD8 MAPK1 SH3BP1 PSMC6 PSMB5 CTSZ PSMD10 STK3 CAV1 SFRP4 PSMD9 PDCD10 RTN4 PSMB2 KRT36 SPINK5 IL6ST NUMA1 RDX PML CBR1 PSMC2 AP2M1 KRT82 LCE3D PSMD6 PSMC3 KLK13 MAP2K1 FASN KRT8 KRT75 IRX2 LAMB2 PPP1CA DAG1 PSMD1 TCAP GRB2 PSAPL1 COL18A1 KRT76 KRT79 AP2A1 PSMD12 SERPINB13 PSAP TGM2 COL15A1 SERPINB5 RPTN CES1 PSMB3 PSMC4 PSME1
0.00801480918762941	63	1411	1.51563973250596	Negative regulation of signal transduction	http://amigo.geneontology.org/amigo/term/GO:0009968	GCLC PAFAH1B1 PLAUR DCN MVP GCLM CUL3 LTBP1 RHOA IFI35 TSG101 DNM2 EPS15 FKBP1A PSMD5 PSMD8 SH3BP1 PSMC6 PSMB5 PSMD10 CSK STK3 PPP2CB PPP2R1A CAV1 SFRP4 EIF3A PSMD9 GNAI2 IL1R2 PLEK PADI2 GBP1 STMN1 NMI PSMB2 EPS15L1 IL6ST TKFC PSMC2 PSMD6 PF4 PRKCD HMGB2 PSMC3 FBN1 ACAA2 RGS19 PRNP DAG1 PSMD1 TRIM72 GRB2 ISG15 CD47 PSMD12 RACK1 PDCD6 LYN PSMB3 MIF PSMC4 PSME1
0.00172786116910976	63	1313	1.62876440408675	Cellular response to oxygen-containing compound	http://amigo.geneontology.org/amigo/term/GO:1901701	GCLC NADK GCLM CYBA IPO5 RHOA ROCK1 VPS35 XRCC5 DNM2 AKR1B1 CHMP5 RANBP1 CRKL MAPK1 CSK CAV1 PPP3CB PRKAR1A LAMTOR3 NFKB1 DCPS PDCD10 PRKAR2A GNAI2 ATP6V1A ADPRS IDE ATP6V1F CSRP3 LAMTOR5 CASP1 USO1 ESD RPS3 EIF4E IMPACT AIFM1 CAPN2 PF4 PRKCD H2AZ1 HMGB2 FBN1 KIF5B PRNP DAG1 CCS TRIM72 GRB2 PTPN11 HMGB1 MYO1C ADH5 APRT TGM2 RACK1 FIS1 NME1 LYN CES1 PKLR PRKACA
0.000338399307495061	63	1226	1.74434556489878	Negative regulation of protein metabolic process	http://amigo.geneontology.org/amigo/term/GO:0051248	GCLC PLAUR MVP IPO5 ROCK1 TSG101 LXN TMED2 RTRAF FKBP1A CRKL PPM1F PFDN4 CTSZ USP14 PPP2R1A CAV1 PRKAR1A NFKB1 CRYAB DCPS SNX3 PRKAR2A GNAI2 RTN4 IL1R2 PTPA IDE NCKAP1L SERPINB6 RTN3 SPINK5 SWAP70 EIF2S1 LAMTOR5 SYNCRIP NIBAN1 PML TIPRL PFDN2 SRP9 RPS3 EIF4E IMPACT VBP1 CALM3 IFI16 PRKCD OTUB1 WFDC12 SERPINB9 PRNP PAK2 ISG15 SF3B3 SERPINB13 RACK1 IPO7 SERPINB5 LSM2 SERPINB10 LYN ITGB3
6.1559742391066e-06	63	1066	2.00616103430197	Intracellular protein transport	http://amigo.geneontology.org/amigo/term/GO:0006886	IPO5 VPS35 RAB27A STXBP2 XPO1 RPS5 TMED2 ERP29 MAPK1 CHMP4B NUTF2 NAPA RAB3D RAB5C EHD1 VPS29 RPS12 PDCD10 RAB14 LTBP2 UFM1 COPA CLTA SSR1 RAB17 RAN ARF3 RPL35 RPS6 USO1 MAPK8IP3 PML RPS8 SNAPIN SRP9 HSPD1 ATG3 RPS3 AIFM1 AP2M1 PRKCD STX3 KIF5B PRNP RAB6A PTPN11 HCLS1 COPG1 AP1S2 UBE2L3 KPNA4 NACA AP2A1 MYO1C GET3 RPL10A GDI1 SNX2 IPO7 FIS1 PDCD6 NSF CHMP4A
3.24380778785837e-05	62	1102	1.90982045745234	Carboxylic acid metabolic process	http://amigo.geneontology.org/amigo/term/GO:0019752	GCLC GCLM HAGH KARS1 ST6GAL1 AKR1B1 DLD FH PSMD5 PSMD8 MTAP ACO2 PSMC6 PSMB5 PSMD10 SMS EARS2 CAV1 ERLIN1 PSMD9 PTGES3 GNPDA1 DARS1 ACAT2 GLO1 GOT2 PSMB2 ALOX5AP GSTM1 GLUL ATIC HADH SORD PFKL EPHX1 ALDH1L1 PAM QDPR PFKM CBR1 PSMC2 PM20D1 PSMD6 PSMC3 ACAA2 ECI1 FASN PSMD1 PPA1 IDH2 ADSS1 CYP4F2 PSMD12 ADH5 DDAH2 CES1 PKLR PSMB3 MIF PSMC4 PSME1 MSRA
0.00105426108273563	61	1231	1.68210936284245	Response to nitrogen compound	http://amigo.geneontology.org/amigo/term/GO:1901698	GCLC GCLM CYBA IPO5 RHOA ROCK1 VPS35 DNM2 AKR1B1 CHMP5 DPYSL2 CRKL MAPK1 PSMC6 USP14 CSK CAV1 ERLIN1 PRKAR1A LAMTOR3 NFKB1 PRKAR2A GNAI2 ATP6V1A SRSF4 CASQ2 IDE GOT2 PSMB2 ATP6V1F CSRP3 DIAPH1 GSTM1 LAMTOR5 DHX9 CASP1 USO1 HADH HSPD1 QDPR IMPACT AIFM1 CALM3 CAPN2 PRKCD FBN1 PRNP DAG1 TRIM72 GRB2 PTPN11 DDI2 MYO1C APRT TGM2 FIS1 NME1 LYN CES1 PKLR PRKACA
0.000494756359140999	60	1166	1.7467676734182	Mitotic cell cycle	http://amigo.geneontology.org/amigo/term/GO:0000278	PAFAH1B1 CUL3 CUL1 RHOA ROCK1 DYNC1I2 DNM2 XPO1 CHMP5 NSFL1C NUDC PSMD5 PSMD8 RANBP1 SUN2 PSMC6 PSMB5 MAPRE1 CHMP4B PSMD10 UBE2I PPP2R1A SMC3 PSMD9 SKP1 STMN1 PTPA SEPTIN6 PSMB2 CHMP2A CLIP1 RAN MYH10 RPS6 NUMA1 RDX TMOD3 PML LBR EIF4E CALM3 PSMC2 PSMD6 PSMC3 DDB1 PSMD1 CRLF3 PTPN11 TUBB4B DYNC1H1 PSMD12 DCTN1 TUBB CHMP1B PSMB3 PSMC4 RCC2 PSME1 CHMP4A PRKACA
1.81798388111399e-05	60	1032	1.97357665426902	Regulation of cellular component biogenesis	http://amigo.geneontology.org/amigo/term/GO:0044087	WAS SLK RHOA ROCK1 VPS35 TSG101 XRCC5 DNM2 CHMP5 PPM1F PSMC6 MAPRE1 CHMP4B NAPA MTPN CAV1 CRYAB CAND1 PLEK STMN1 NCKAP1L RAB17 EML2 CHMP2A CLIP1 SWAP70 ARPC5L NUMA1 RDX TMOD3 MIEN1 ATG3 ADD3 RPS3 ASAP1 IMPACT PSMC2 PRKCD PSMC3 DDB1 CORO1B DAG1 RHOG GRB2 PTPN11 HCLS1 PAK2 SEPTIN9 HMGB1 CD47 DYNC1H1 MYO1C RACK1 DCTN1 BRK1 CHMP1B PSMC4 RCC2 CHMP4A PRKACA
2.64513119594312e-05	59	1021	1.96159215352811	Mitotic cell cycle process	http://amigo.geneontology.org/amigo/term/GO:1903047	PAFAH1B1 CUL3 CUL1 RHOA ROCK1 DYNC1I2 DNM2 XPO1 CHMP5 NSFL1C NUDC PSMD5 PSMD8 RANBP1 SUN2 PSMC6 PSMB5 MAPRE1 CHMP4B PSMD10 UBE2I PPP2R1A SMC3 PSMD9 SKP1 STMN1 PTPA SEPTIN6 PSMB2 CHMP2A CLIP1 RAN MYH10 RPS6 NUMA1 RDX TMOD3 PML LBR EIF4E CALM3 PSMC2 PSMD6 PSMC3 DDB1 PSMD1 CRLF3 TUBB4B DYNC1H1 PSMD12 DCTN1 TUBB CHMP1B PSMB3 PSMC4 RCC2 PSME1 CHMP4A PRKACA
0.00710551688846987	58	1264	1.5576266378946	Chemical homeostasis	http://amigo.geneontology.org/amigo/term/GO:0048878	GCLC NADK DCN GCLM GRN CYBA CUL1 AKR1B1 FKBP1A MAPK1 CAV1 SFRP4 PPP3CB GLRX3 PRKAR1A EHD1 ATP5F1B CAND1 SKP1 PRKAR2A GNAI2 ATP6V1A RTN4 STMN1 CASQ2 ATP6V1F CSRP3 DIAPH1 SWAP70 RPS6 PRCP PML TMCO1 SNAPIN CAMK2D PFKM CALM3 ASGR2 DDB1 KIF5B FPR1 PRNP PTPN11 BOLA2 CYP4F2 HMGB1 ATP2A1 ERO1A PLCG2 BPIFA1 TGM2 RACK1 FIS1 NME1 LYN CES1 CALB2 PRKACA
0.00453738734290827	57	1208	1.60173390053422	Carbohydrate derivative metabolic process	http://amigo.geneontology.org/amigo/term/GO:1901135	PGLYRP1 DCN H6PD AKR7A2 RHOA ST6GAL1 AKR1B1 GANAB DLD ATP5F1D MTAP MAN2B1 NAGLU NFKB1 MANBA GALNT7 ATP5F1B GNPDA1 ATP6V1A ABHD14B PAICS PUDP FBP2 MGAT1 RAN CHI3L1 CHIT1 AMPD3 GNS ATIC SORD PFKL TKFC ATP5F1A PFKM ATP5MC3 ASGR2 BPNT1 PRKCD NUDT2 NUDT5 PGM2 HINT1 FASN GUSB BGN UPP1 ADSS1 PRELP AP2A1 RPE PSAP APRT NME1 PKLR NUDT3 GFUS
0.00113703905501335	57	1129	1.71381271199765	Immune system development	http://amigo.geneontology.org/amigo/term/GO:0002520	PAFAH1B1 PGLYRP1 CNN2 RHOA XRCC5 PSMD5 PSMD8 CRKL MAPK1 PSMC6 PSMB5 PSMD10 KAT8 STK3 CLC PPP3CB PSMD9 PLEK RO60 NCKAP1L GLO1 PSMB2 FGL2 SPINK5 SWAP70 DOCK2 RPS6 TMOD3 PML LBR HSPD1 PSMC2 IFI16 PSMD6 PF4 HMGB2 PSMC3 FBN1 MAP2K1 FASN AHSP KRT75 PSMD1 PTPN11 HCLS1 H3C13 EVI2B ISG15 HMGB1 PSMD12 PLCG2 NME1 LYN PSMB3 PRTN3 PSMC4 PSME1
0.000973220019897278	57	1121	1.72604331119121	Response to organonitrogen compound	http://amigo.geneontology.org/amigo/term/GO:0010243	GCLC GCLM CYBA IPO5 RHOA ROCK1 VPS35 DNM2 AKR1B1 CHMP5 DPYSL2 MAPK1 PSMC6 USP14 CSK CAV1 ERLIN1 PRKAR1A LAMTOR3 NFKB1 PRKAR2A GNAI2 ATP6V1A SRSF4 CASQ2 IDE GOT2 PSMB2 ATP6V1F CSRP3 DIAPH1 LAMTOR5 CASP1 USO1 HADH HSPD1 QDPR IMPACT AIFM1 CALM3 CAPN2 PRKCD FBN1 PRNP DAG1 TRIM72 GRB2 PTPN11 MYO1C APRT TGM2 FIS1 NME1 LYN CES1 PKLR PRKACA
0.000403448778505495	57	1079	1.79322942710412	Protein catabolic process	http://amigo.geneontology.org/amigo/term/GO:0030163	GCLC CUL3 CUL1 ROCK1 VPS35 TSG101 UBE2K XPO1 NSFL1C PSMD5 PSMD8 PSMC6 PSMB5 CTSZ EEF1A2 CHMP4B USP14 PSMD10 UBE2I PPP2CB CAV1 ERLIN1 MANBA CTSC PSMD9 USP5 SNX3 SKP1 UCHL3 IDE CLTA PSMB2 RDX PML RNF111 PSMC2 AP2M1 CAPN2 PSMD6 PSMC3 DDB1 PSMD1 TRIM72 RAD23A UBA7 UBE2L3 ISG15 SF3B3 AP2A1 PSMD12 DDI2 RACK1 PSMB3 NSF PSMC4 PSME1 PRKACA
0.000146857091817687	57	1034	1.87127132673631	Regulation of anatomical structure morphogenesis	http://amigo.geneontology.org/amigo/term/GO:0022603	FGR HSPB6 PAFAH1B1 STAB1 DCN GRN RHOA ROCK1 VPS35 DNM2 ARHGAP4 PSMD5 PSMD8 CRKL PSMC6 PSMB5 PSMD10 OLFM4 VAT1 PSMD9 RTN4 GBP1 PSMB2 DIAPH1 MYH10 CHI3L1 SPINK5 GLUL RDX PML TIAM2 EPB41 S100A1 PSMC2 AP2M1 PSMD6 PF4 ERAP1 PSMC3 MAP2K1 CORO1B DAG1 PSMD1 RHOG PAK2 FMNL1 HMGB1 AP2A1 PSMD12 GDI1 RACK1 FIS1 PDCD6 PSMB3 PSMC4 RCC2 PSME1
2.13320325904863e-05	57	965	2.00507207445113	Cytokine-mediated signaling pathway	http://amigo.geneontology.org/amigo/term/GO:0019221	PAFAH1B1 CUL1 CNN2 IFI35 UBE2K PSMD5 PSMD8 MTAP CRKL PSMC6 PSMB5 PSMD10 CSK CAV1 NFKB1 PSMD9 SKP1 IL1R2 PADI2 GBP1 IFIT2 NMI PSMB2 TXNDC17 IL6ST CASP1 PML CAMK2D PSMC2 GBP2 PSMD6 PF4 PRKCD PSMC3 STX3 KRT8 FPR1 IL16 OXSR1 PSMD1 PITPNA GRB2 PTPN11 PAK2 BOLA2 H3C13 ISG15 PSMD12 RACK1 IFI30 PSMB3 MIF PRTN3 PSMC4 CANX PSME1 PRKACA
5.50449453919746e-06	57	919	2.10543476805804	Supramolecular fiber organization	http://amigo.geneontology.org/amigo/term/GO:0097435	PAFAH1B1 WAS CUL3 SLK RHOA ROCK1 FKBP1A LTBP4 PPM1F SH3BP1 PFDN4 MAPRE1 TNNT1 MTPN AEBP1 PRKAR1A MYH3 CRYAB COL12A1 PLEK STMN1 LTBP2 NCKAP1L EML2 CSRP3 CLIP1 DIAPH1 SWAP70 ARPC5L NUMA1 RDX TMOD3 MYO1F PFDN2 ADD3 RPS3 VBP1 PRKCD CFL2 KRT8 CORO1B TCAP RHOG GRB2 HCLS1 PAK2 COL18A1 H3C13 COL14A1 CD47 DYNC1H1 MYH6 MYO1C COL15A1 DCTN1 BRK1 MYH11
4.18600898232861e-06	57	908	2.13094113639355	Regulation of defense response	http://amigo.geneontology.org/amigo/term/GO:0031347	FGR PGLYRP1 GRN CYBA CUL1 KARS1 IFI35 VPS35 UBE2K XRCC5 PSMD5 PSMD8 PSMC6 PSMB5 PSMD10 PRKAR1A NFKB1 CTSC PSMD9 SKP1 PRKAR2A NMI PSMB2 FGL2 ALOX5AP SPINK5 IL6ST DHX9 CASP1 PML HSPD1 TKFC VSIG4 PSMC2 IFI16 PSMD6 PRKCD HMGB2 ERAP1 PSMC3 SERPINB9 IL16 PSMD1 PTPN11 PAK2 ISG15 HMGB1 CD47 PSMD12 PLCG2 TGM2 FCGR3A LYN PSMB3 PSMC4 PSME1 PRKACA
0.00029636769135818	56	1040	1.82783560903069	Protein localization to organelle	http://amigo.geneontology.org/amigo/term/GO:0033365	IPO5 VPS35 TSG101 XRCC5 XPO1 RPS5 NSFL1C MAPK1 SUN2 MAPRE1 CHMP4B VAPA NUTF2 EHD1 RPS12 SKP1 RTN4 CCT4 GBP1 UFM1 SRGN CSRP3 DIAPH1 RAN LAMTOR5 CCT7 GLUL DHX9 RPL35 RPS6 NUMA1 RDX SSB PML RPS8 SRP9 HSPD1 RPS3 CCT8 AIFM1 CALM3 GBP2 CCT3 PRKCD PRNP DAG1 RAB6A HCLS1 UBE2L3 KPNA4 GET3 RPL10A IPO7 FIS1 RCC2 CHMP4A
0.0106278809291011	55	1209	1.54425435478783	Regulation of cell cycle	http://amigo.geneontology.org/amigo/term/GO:0051726	PAFAH1B1 CUL3 CUL1 IPO5 RHOA DYNC1I2 XPO1 CHMP5 NSFL1C PSMD5 PSMD8 RANBP1 PSMC6 PSMB5 MAPRE1 RPRD1B CHMP4B PSMD10 PPP2R1A PRKAR1A PSMD9 SKP1 CBX3 PSMB2 CHMP2A NUMA1 RDX TMOD3 PML TIPRL EIF4E CALM3 PSMC2 RBBP4 PSMD6 PSMC3 DDB1 PSMD1 RAD23A PTPN11 TUBB4B DYNC1H1 SND1 PSMD12 PLCG2 RACK1 DCTN1 IPO7 TUBB CHMP1B PSMB3 PSMC4 RCC2 PSME1 PRKACA
0.0070314798027621	55	1181	1.58086665109101	Regulation of catabolic process	http://amigo.geneontology.org/amigo/term/GO:0009894	GCLC DCN ROCK1 VPS35 UBE2K XPO1 SPTLC1 HNRNPC PSMD5 PSMD8 PSMC6 PSMB5 EEF1A2 CHMP4B USP14 PSMD10 KAT8 CAV1 LAMTOR3 CTSC DCPS PSMD9 USP5 SNX3 ATP6V1A IDE PSMB2 LAMTOR5 SYNCRIP DHX9 RDX CASP1 PML AIFM1 PSMC2 IFI16 PSMD6 PRKCD PSMC3 DDB1 PPP1CA PSMD1 RAD23A SF3B3 HMGB1 PSMD12 PSAP RACK1 LSM2 PSMB3 NSF PSMC4 PSME1 CHMP4A PRKACA
0.0039253871252888	55	1145	1.63057075540479	Negative regulation of cellular protein metabolic process	http://amigo.geneontology.org/amigo/term/GO:0032269	GCLC PLAUR MVP IPO5 ROCK1 TSG101 LXN TMED2 RTRAF FKBP1A CRKL PPM1F CTSZ USP14 PPP2R1A CAV1 PRKAR1A NFKB1 CRYAB DCPS PRKAR2A GNAI2 IL1R2 PTPA IDE NCKAP1L SERPINB6 SPINK5 SWAP70 EIF2S1 LAMTOR5 SYNCRIP NIBAN1 PML TIPRL SRP9 RPS3 EIF4E IMPACT CALM3 IFI16 PRKCD OTUB1 WFDC12 SERPINB9 PRNP PAK2 ISG15 SERPINB13 RACK1 IPO7 SERPINB5 LSM2 SERPINB10 LYN
0.00031965628351577	55	1018	1.83399166496905	Peptide metabolic process	http://amigo.geneontology.org/amigo/term/GO:0006518	GCLC GCLM EIF4B HAGH KARS1 RHOA ROCK1 RPS5 TMED2 MAPK1 CTSZ EEF1A2 EARS2 MTPN EIF3B EIF3A DCPS RPS12 RTN4 DARS1 IDE GLO1 CNDP2 RTN3 EIF2S1 GSTM1 SYNCRIP DHX9 NIBAN1 RPL35 RPS6 DENR PML RPS8 SRP9 PAM RPS3 EIF4E IMPACT EIF4A1 ERAP1 PA2G4 PRNP THOP1 PPP1CA EIF3F PPA1 NACA RPL10A RACK1 EIF3CL LSM2 CES1 EEF1D EEF1B2
3.88528820272086e-05	55	937	1.99253310025452	Regulation of protein localization	http://amigo.geneontology.org/amigo/term/GO:0032880	NADK IPO5 KCNAB2 TSG101 XPO1 FKBP1A NSFL1C ERP29 CRKL MAPK1 PPM1F NUTF2 CSK PPP3CB PSMD9 SNX3 PDCD10 RTN4 CCT4 GBP1 RAB14 UFM1 CSRP3 RAN MYH10 SWAP70 LAMTOR5 CCT7 GLUL NUMA1 RDX HADH PML PFKL PAM PFKM CCT8 EPB41 AP2M1 CCT3 PRKCD STX3 KIF5B PRNP DAG1 RHOG PTPN11 HCLS1 IDH2 UBE2L3 MYO1C GDI1 RACK1 FIS1 ITGB3
1.46884033126869e-06	55	830	2.24940182522709	Positive regulation of immune response	http://amigo.geneontology.org/amigo/term/GO:0050778	FGR WAS GRN CYBA CUL1 KARS1 IFI35 UBE2K XRCC5 FYB1 CD59 PSMD5 PSMD8 CRKL MAPK1 PSMC6 PSMB5 PSMD10 CSK NFKB1 PSMD9 SKP1 GBP1 NCKAP1L NMI PSMB2 IL6ST DHX9 HSPD1 RPS3 VSIG4 ICOSLG PSMC2 IFI16 PSMD6 PRKCD HMGB2 PSMC3 FPR1 PRNP PSMD1 GRB2 PAK2 HMGB1 CD47 PSMD12 MYO1C PLCG2 FCGR3A LYN BRK1 PSMB3 PSMC4 PSME1 PRKACA
0.0237124584370908	54	1241	1.47708138314671	Negative regulation of molecular function	http://amigo.geneontology.org/amigo/term/GO:0044092	PLAUR MVP IPO5 ROCK1 TSG101 LXN TMED2 RTRAF FKBP1A PPM1F CTSZ USP14 PSMD10 CSK CAV1 SFRP4 PRKAR1A NFKB1 CRYAB CAND1 PRKAR2A GNAI2 STMN1 CASQ2 FKBP15 PTPA IFIT2 NCKAP1L SERPINB6 SPINK5 EIF2S1 LAMTOR5 RDX PML TIPRL CAMK2D CALM3 IFI16 PRKCD WFDC12 GPS1 SERPINB9 PRNP PPP1CA OXSR1 PAK2 SERPINB13 RACK1 IPO7 SERPINB5 SERPINB10 LYN ITGB3 RCC2
0.000585684898479242	54	1020	1.79711568282849	MRNA metabolic process	http://amigo.geneontology.org/amigo/term/GO:0016071	ROCK1 XPO1 RPS5 SF3B2 HNRNPC PSMD5 HNRNPH3 PSMD8 SF3A1 SNRPD3 DDX17 PSMC6 PSMB5 RPRD1B PSMD10 PPP2R1A DCPS PSMD9 CPSF6 SRSF3 RPS12 SRSF4 SNRPB PSMB2 LSM8 RBM39 SRRM1 SYNCRIP HNRNPA1 DHX9 RPL35 RPS6 SSB RPS8 LUC7L2 RPS3 PSMC2 PSMD6 PRKCD PSMC3 HNRNPA3 PSMD1 SF3A3 SF3B3 PSMD12 RPL10A LSM2 PPIL3 EEF1D PSMB3 PSMC4 HNRNPH1 PSME1 PRKACA
0.00036078131583742	54	998	1.83673145940387	Response to hormone	http://amigo.geneontology.org/amigo/term/GO:0009725	GCLC GCLM CYBA RHOA ROCK1 AKR1B1 MAPK1 DDX17 CSK CAV1 SFRP4 PRKAR1A NFKB1 SCGB2A2 PTGES3 PRKAR2A GNAI2 ATP6V1A SRSF4 PADI2 IDE UFM1 GOT2 ATP6V1F CSRP3 PRCP RDX USO1 HADH SORD HSPD1 PAM EIF4E QDPR AIFM1 CALM3 AGL PRKCD HMGB2 FBN1 SERPINB9 DAG1 TRIM72 GRB2 PTPN11 HCLS1 H3C13 UBE2L3 HMGB1 MYO1C APRT LYN PKLR PRKACA
0.0161896402652051	53	1183	1.52080513781203	Anatomical structure formation involved in morphogenesis	http://amigo.geneontology.org/amigo/term/GO:0048646	HSPB6 PAFAH1B1 STAB1 DCN EHD2 GRN CUL3 RHOA ROCK1 TMED2 FKBP1A MAPK1 STK3 TNNT1 MTPN CAV1 PPP3CB PRKAR1A MYH3 EHD1 ATP5F1B COL12A1 PDCD10 RTN4 CSRP3 CHI3L1 SPINK5 GLUL PRCP TMOD3 PML S100A1 CAPN2 PF4 ERAP1 CFL2 MAP2K1 KRT8 IRX2 DAG1 TCAP GRB2 PTPN11 COL18A1 HMGB1 MYH6 TXNRD1 TGM2 COL15A1 PDCD6 ITGB3 MYH11 FAM20C
0.00255029763359938	53	1069	1.68298641537103	Hematopoietic or lymphoid organ development	http://amigo.geneontology.org/amigo/term/GO:0048534	PAFAH1B1 PGLYRP1 CNN2 RHOA XRCC5 PSMD5 PSMD8 CRKL MAPK1 PSMC6 PSMB5 PSMD10 KAT8 STK3 PPP3CB PSMD9 PLEK NCKAP1L GLO1 PSMB2 FGL2 SPINK5 DOCK2 RPS6 TMOD3 PML LBR PSMC2 IFI16 PSMD6 PF4 HMGB2 PSMC3 FBN1 MAP2K1 FASN AHSP KRT75 PSMD1 PTPN11 HCLS1 H3C13 EVI2B ISG15 HMGB1 PSMD12 PLCG2 NME1 LYN PSMB3 PRTN3 PSMC4 PSME1
0.00997514687087778	52	1122	1.5732325842943	Enzyme linked receptor protein signaling pathway	http://amigo.geneontology.org/amigo/term/GO:0007167	FGR PLAUR DCN MVP LTBP1 CYBA RHOA ROCK1 TSG101 DNM2 CPNE3 EPS15 FKBP1A LTBP4 CRKL MAPK1 NCF4 C20orf27 CAV1 SFRP4 GNAI2 ATP6V1A RTN4 NCF2 STMN1 RAB14 LTBP2 IDE NCKAP1L EPS15L1 ATP6V1F CSRP3 IL6ST HNRNPA1 NUMA1 PML RNF111 AP2M1 PRKCD SVEP1 FBN1 TRIM72 GRB2 PTPN11 PAK2 AP2A1 MYO1C PDCD6 LYN BRK1 ITGB3 HNRNPH1
1.8768233561643e-05	52	842	2.0963978142259	Actin filament-based process	http://amigo.geneontology.org/amigo/term/GO:0030029	PAFAH1B1 WAS EHD2 CUL3 CNN2 RHOA ROCK1 PPM1F SH3BP1 SUN2 TNNT1 MTPN CAV1 PRKAR1A MYH3 PLEK STMN1 NCKAP1L CSRP3 DIAPH1 MYH8 MYH10 SWAP70 DOCK2 ARPC5L RDX TMOD3 MYO1F CAMK2D PAM ADD3 PDLIM3 EPB41 PRKCD CFL2 KRT8 CORO1B TCAP RHOG GRB2 HCLS1 PAK2 FHL3 FMNL1 ATP2A1 CD47 PDLIM7 MYH6 MYO1C BRK1 MYH4 MYH11
0.0135058165123431	51	1115	1.55266496961864	Negative regulation of cell death	http://amigo.geneontology.org/amigo/term/GO:0060548	GCLC HSPB6 PLAUR GCLM GRN RHOA VPS35 AKR1B1 MAPK1 CHMP4B PSMD10 CAV1 NFKB1 CRYAB DCPS TMEM109 PDCD10 GNAI2 GBE1 UFM1 NCKAP1L GLO1 CHMP2A LAMTOR5 IL6ST RPS6 MIEN1 HSPD1 IMPACT PM20D1 PF4 PRKCD HMGB2 API5 ACAA2 DDB1 PA2G4 SERPINB9 PRNP HCLS1 PAK2 EVI2B NACA SERPINB13 PLCG2 RACK1 DDAH2 TXNDC5 SERPINB10 MIF CHMP4A
0.00956419507475605	51	1092	1.58536762007764	Regulation of cellular component movement	http://amigo.geneontology.org/amigo/term/GO:0051270	FGR DCN WAS GRN CNN2 SLK RHOA ROCK1 STK10 CPNE3 ARHGAP4 CRKL MAPK1 PPM1F SH3BP1 SUN2 MAPRE1 STK24 CAV1 ATP5F1B PDCD10 GNAI2 RTN4 PADI2 STMN1 NCKAP1L AKAP12 DIAPH1 SWAP70 GLUL PRCP RDX MIEN1 CAMK2D ATP5F1A CORO1B OXSR1 DAG1 RHOG IDH2 HMGB1 ATP2A1 MYO1C PLCG2 RACK1 PDCD6 LYN ITGB3 MIF GFUS RCC2
0.00528055324432512	51	1056	1.63941424348938	Regulation of locomotion	http://amigo.geneontology.org/amigo/term/GO:0040012	FGR DCN WAS GRN CNN2 SLK RHOA ROCK1 STK10 CPNE3 ARHGAP4 CRKL MAPK1 PPM1F SH3BP1 SUN2 MAPRE1 USP14 STK24 CAV1 ATP5F1B PDCD10 GNAI2 RTN4 PADI2 NCKAP1L AKAP12 DIAPH1 SWAP70 GLUL PRCP RDX MIEN1 ATP5F1A STX3 IL16 CORO1B OXSR1 DAG1 RHOG IDH2 HMGB1 MYO1C PLCG2 RACK1 PDCD6 LYN ITGB3 MIF GFUS RCC2
0.000231173779964693	51	903	1.91718874986133	Cellular protein catabolic process	http://amigo.geneontology.org/amigo/term/GO:0044257	GCLC CUL3 CUL1 VPS35 TSG101 UBE2K XPO1 NSFL1C PSMD5 PSMD8 PSMC6 PSMB5 CTSZ CHMP4B USP14 PSMD10 UBE2I PPP2CB CAV1 ERLIN1 CTSC PSMD9 USP5 SKP1 UCHL3 IDE CLTA PSMB2 RDX PML RNF111 PSMC2 AP2M1 CAPN2 PSMD6 PSMC3 DDB1 PSMD1 TRIM72 RAD23A UBA7 UBE2L3 ISG15 AP2A1 PSMD12 DDI2 RACK1 PSMB3 PSMC4 PSME1 PRKACA
0.0219473991796103	50	1121	1.51407307999229	Organophosphate metabolic process	http://amigo.geneontology.org/amigo/term/GO:0019637	PAFAH1B1 NADK H6PD KARS1 RHOA MOCOS CPNE3 DLD ATP5F1D MAPK1 MINPP1 ATP5F1B ATP6V1A ABHD14B PLEK RAB14 PAICS PUDP FBP2 RAN AMPD3 ARF3 ATIC SORD PFKL TKFC ATP5F1A PFKM ATP5MC3 BPNT1 CAPN2 PLB1 PRKCD NUDT2 NUDT5 PGM2 HINT1 FASN NADSYN1 IDH2 UPP1 PGP ADSS1 RPE PLCG2 APRT NME1 PKLR NUDT3 FITM1
0.00545697192356214	50	1031	1.64624240802265	Hemopoiesis	http://amigo.geneontology.org/amigo/term/GO:0030097	PAFAH1B1 PGLYRP1 CNN2 RHOA XRCC5 PSMD5 PSMD8 PSMC6 PSMB5 PSMD10 KAT8 STK3 PPP3CB PSMD9 PLEK NCKAP1L GLO1 PSMB2 FGL2 SPINK5 DOCK2 RPS6 TMOD3 PML LBR PSMC2 IFI16 PSMD6 PF4 HMGB2 PSMC3 FBN1 FASN AHSP KRT75 PSMD1 PTPN11 HCLS1 H3C13 EVI2B ISG15 HMGB1 PSMD12 PLCG2 NME1 LYN PSMB3 PRTN3 PSMC4 PSME1
0.00400543446324727	50	1013	1.67549449424615	Positive regulation of transport	http://amigo.geneontology.org/amigo/term/GO:0051050	FGR NADK EHD2 CYBA IPO5 RAB27A TSG101 DNM2 DPYSL2 MAPK1 NUTF2 RAB3D CAV1 SFRP4 PPP3CB EHD1 PSMD9 CPSF6 PDCD10 GNAI2 NCKAP1L CHMP2A RAN MYH10 DOCK2 GLUL DHX9 NUMA1 RDX SNAPIN PFKM CALM3 S100A1 AP2M1 PRKCD KIF5B PRNP PTPN11 HCLS1 UBE2L3 CYP4F2 ATP2A1 CD47 AP2A1 DYNC1H1 MYO1C PLCG2 RACK1 FIS1 CES1
0.00349124209142644	50	1006	1.68715300464349	Amide biosynthetic process	http://amigo.geneontology.org/amigo/term/GO:0043604	GCLC GCLM EIF4B HAGH KARS1 RHOA ROCK1 RPS5 TMED2 SPTLC1 DLD MAPK1 EEF1A2 EARS2 MTPN EIF3B EIF3A DCPS RPS12 DARS1 CNDP2 EIF2S1 SYNCRIP DHX9 NIBAN1 RPL35 RPS6 DENR PML RPS8 SRP9 PAM RPS3 EIF4E IMPACT EIF4A1 PM20D1 PRKCD FASN PA2G4 PPP1CA EIF3F PPA1 NACA RPL10A RACK1 EIF3CL LSM2 EEF1D EEF1B2
0.00330999791933597	50	1003	1.69219932469726	Regulation of cellular catabolic process	http://amigo.geneontology.org/amigo/term/GO:0031329	GCLC DCN ROCK1 VPS35 UBE2K XPO1 SPTLC1 HNRNPC PSMD5 PSMD8 PSMC6 PSMB5 EEF1A2 CHMP4B USP14 PSMD10 KAT8 CAV1 LAMTOR3 CTSC DCPS PSMD9 USP5 ATP6V1A PSMB2 LAMTOR5 SYNCRIP DHX9 RDX CASP1 PML AIFM1 PSMC2 IFI16 PSMD6 PRKCD PSMC3 PPP1CA PSMD1 RAD23A HMGB1 PSMD12 PSAP RACK1 LSM2 PSMB3 PSMC4 PSME1 CHMP4A PRKACA
0.00210660593657623	50	979	1.73368327137013	Cellular homeostasis	http://amigo.geneontology.org/amigo/term/GO:0019725	GCLC NADK GCLM GRN CYBA CUL1 UBE2K FKBP1A DLD MAPK1 NCF4 CAV1 PPP3CB GLRX3 ATP5F1B CAND1 SKP1 ATP6V1A RTN4 NCF2 CASQ2 IDE ATP6V1F CSRP3 DIAPH1 SWAP70 PML TMCO1 SNAPIN CAMK2D PFKM CALM3 CFL2 KIF5B FPR1 PRNP BOLA2 HMGB1 ATP2A1 ERO1A PLCG2 TXNRD1 TGM2 RACK1 DCTN1 FIS1 NME1 LYN CALB2 PRKACA
0.000289104777782895	50	889	1.90919676340985	Regulation of cell cycle process	http://amigo.geneontology.org/amigo/term/GO:0010564	PAFAH1B1 CUL3 CUL1 RHOA DYNC1I2 XPO1 CHMP5 NSFL1C PSMD5 PSMD8 RANBP1 PSMC6 PSMB5 MAPRE1 RPRD1B CHMP4B PSMD10 PPP2R1A PRKAR1A PSMD9 SKP1 CBX3 PSMB2 CHMP2A NUMA1 RDX TMOD3 PML TIPRL CALM3 PSMC2 RBBP4 PSMD6 PSMC3 DDB1 PSMD1 PTPN11 TUBB4B DYNC1H1 SND1 PSMD12 PLCG2 DCTN1 TUBB CHMP1B PSMB3 PSMC4 RCC2 PSME1 PRKACA
5.21852729906586e-06	50	756	2.2450739717875	Immune response-regulating signaling pathway	http://amigo.geneontology.org/amigo/term/GO:0002764	FGR WAS CYBA CUL1 IFI35 FYB1 PSMD5 PSMD8 CRKL MAPK1 PSMC6 PSMB5 PSMD10 CSK CAV1 PPP3CB NFKB1 PSMD9 SKP1 RTN4 GBP1 NCKAP1L NMI PSMB2 HSPD1 RPS3 TKFC ICOSLG S100A1 PSMC2 PSMD6 PRKCD PSMC3 FPR1 PRNP PSMD1 GRB2 PAK2 HMGB1 CD47 PSMD12 MYO1C PLCG2 FCGR3A LYN BRK1 PSMB3 PSMC4 PSME1 PRKACA
0.000142128024408865	49	836	1.98962967011714	Localization within membrane	http://amigo.geneontology.org/amigo/term/GO:0051668	EHD2 ROCK1 VPS35 DNM2 FYB1 RPS5 EPS15 TMED2 CRKL CHMP4B VAPA CSK RAB3D CAV1 EHD1 VPS29 RPS12 SNX3 GBP1 RAB14 SSR1 RAB17 CSRP3 DOCK2 RPL35 RPS6 RDX RPS8 SRP9 ATG3 RPS3 CALM3 AP2M1 STX3 KIF5B PRNP DAG1 ARHGAP1 RHOG NACA PSAP MYO1C GET3 RPL10A GDI1 RACK1 FIS1 NSF CHMP4A
6.1559742391066e-06	49	739	2.25078539136391	Organic cyclic compound catabolic process	http://amigo.geneontology.org/amigo/term/GO:1901361	RNASET2 ROCK1 XPO1 RPS5 HNRNPC PSMD5 PSMD8 PSMC6 PSMB5 PSMD10 PPP2R1A BLVRA DCPS PSMD9 RPS12 PSMB2 MGAT1 AMPD3 SYNCRIP DHX9 RPL35 RPS6 SSB RPS8 ALDH1L1 RPS3 QDPR AIFM1 PSMC2 PSMD6 PRKCD HMGB2 NUDT5 PSMC3 RNASE3 HINT1 PSMD1 UPP1 H1-0 HMGB1 SND1 PSMD12 RPL10A LSM2 NUDT3 PSMB3 SCARF1 PSMC4 PSME1
2.38931056126845e-06	49	710	2.34271887918018	Aromatic compound catabolic process	http://amigo.geneontology.org/amigo/term/GO:0019439	RNASET2 ROCK1 XPO1 RPS5 HNRNPC PSMD5 PSMD8 PSMC6 PSMB5 PSMD10 PPP2R1A BLVRA DCPS PSMD9 RPS12 PSMB2 MGAT1 AMPD3 SYNCRIP DHX9 RPL35 RPS6 SSB RPS8 EPHX1 ALDH1L1 RPS3 QDPR AIFM1 PSMC2 PSMD6 PRKCD HMGB2 NUDT5 PSMC3 RNASE3 HINT1 PSMD1 UPP1 H1-0 HMGB1 SND1 PSMD12 RPL10A LSM2 NUDT3 PSMB3 PSMC4 PSME1
9.91338712200555e-07	49	686	2.4246798895305	Organelle localization	http://amigo.geneontology.org/amigo/term/GO:0051640	FGR PAFAH1B1 CUL3 RAB27A STXBP2 DYNC1I2 DNM2 XPO1 CD59 CHMP5 TMED2 NSFL1C NUDC DPYSL2 SUN2 CTSZ MAPRE1 CHMP4B PPP6R1 NAPA RAB3D PPP2R1A CTSC PDCD10 TFG PLEK RAB17 CHMP2A RAN NUMA1 USO1 MYO1F SNAPIN STX3 KIF5B RAB6A COPG1 TUBB4B ATP2A1 DYNC1H1 MYO1C DCTN1 TUBB PDCD6 LYN CHMP1B NSF CHMP4A PRKACA
0.00946416908707167	48	1010	1.61325236214307	Regulation of cell motility	http://amigo.geneontology.org/amigo/term/GO:2000145	FGR DCN WAS GRN CNN2 SLK RHOA ROCK1 STK10 CPNE3 ARHGAP4 CRKL MAPK1 PPM1F SH3BP1 SUN2 MAPRE1 STK24 CAV1 ATP5F1B PDCD10 GNAI2 RTN4 PADI2 NCKAP1L AKAP12 DIAPH1 SWAP70 GLUL PRCP RDX MIEN1 ATP5F1A CORO1B OXSR1 DAG1 RHOG IDH2 HMGB1 MYO1C PLCG2 RACK1 PDCD6 LYN ITGB3 MIF GFUS RCC2
0.000232312180309069	48	830	1.96311432019819	Regulation of proteolysis	http://amigo.geneontology.org/amigo/term/GO:0030162	GCLC PLAUR GRN RHOA ROCK1 UBE2K LXN XPO1 LTBP4 PPM1F PSMC6 CTSZ USP14 PSMD10 CAV1 CRYAB CTSC USP5 HSPE1 IL1R2 IDE SERPINB6 SPINK5 LAMTOR5 CASP1 PML HSPD1 RPS3 AIFM1 PSMC2 IFI16 PSMC3 WFDC12 SERPINB9 PRNP RAD23A PAK2 HMGB1 SERPINB13 RACK1 SERPINB5 FIS1 SERPINB10 PDCD6 LYN PSMC4 PSME1 PRKACA
3.5227713473645e-06	48	698	2.3343623005222	Cellular nitrogen compound catabolic process	http://amigo.geneontology.org/amigo/term/GO:0044270	RNASET2 ROCK1 XPO1 RPS5 HNRNPC PSMD5 PSMD8 PSMC6 PSMB5 PSMD10 PPP2R1A BLVRA DCPS PSMD9 RPS12 PSMB2 MGAT1 AMPD3 SYNCRIP DHX9 RPL35 RPS6 SSB RPS8 ALDH1L1 RPS3 AIFM1 PSMC2 PM20D1 PSMD6 PRKCD HMGB2 NUDT5 PSMC3 RNASE3 HINT1 PSMD1 UPP1 H1-0 HMGB1 SND1 PSMD12 RPL10A LSM2 NUDT3 PSMB3 PSMC4 PSME1
1.52755807270115e-07	48	622	2.61958984849598	Positive regulation of response to external stimulus	http://amigo.geneontology.org/amigo/term/GO:0032103	GRN CYBA CUL1 KARS1 IFI35 UBE2K XRCC5 PSMD5 PSMD8 MAPK1 PPM1F PSMC6 PSMB5 PSMD10 NFKB1 CTSC PSMD9 SKP1 NCKAP1L NMI PSMB2 ALOX5AP SWAP70 IL6ST DHX9 HSPD1 PSMC2 IFI16 PSMD6 PRKCD HMGB2 PSMC3 STX3 IL16 OXSR1 PSMD1 PAK2 HMGB1 CD47 PSMD12 PLCG2 TGM2 LYN PSMB3 SCARF1 PSMC4 PSME1 PRKACA
0.00901521763201878	47	980	1.62799935439905	Organelle assembly	http://amigo.geneontology.org/amigo/term/GO:0070925	PAFAH1B1 VTA1 EHD2 RHOA TSG101 DYNC1I2 XRCC5 DNM2 RPS5 CHMP5 NSFL1C MAPRE1 CHMP4B RP2 TNNT1 PPP2R1A SMC3 PRKAR1A MYH3 EHD1 RO60 RAB14 RAB17 SEPTIN6 CSRP3 CHMP2A EIF2S1 NUMA1 RDX TMOD3 ATG3 RPS3 ASAP1 CFL2 KRT8 TCAP SEPTIN9 TUBB4B DYNC1H1 MYH6 DCTN1 TUBB CHMP1B MYH11 CHMP4A FITM1 PRKACA
0.00491714248692791	47	946	1.68651095910261	Regulation of cell migration	http://amigo.geneontology.org/amigo/term/GO:0030334	FGR DCN GRN CNN2 SLK RHOA ROCK1 STK10 CPNE3 ARHGAP4 CRKL MAPK1 PPM1F SH3BP1 SUN2 MAPRE1 STK24 CAV1 ATP5F1B PDCD10 GNAI2 RTN4 PADI2 NCKAP1L AKAP12 DIAPH1 SWAP70 GLUL PRCP RDX MIEN1 ATP5F1A CORO1B OXSR1 DAG1 RHOG IDH2 HMGB1 MYO1C PLCG2 RACK1 PDCD6 LYN ITGB3 MIF GFUS RCC2
0.00476508598767962	47	944	1.69008407554139	MAPK cascade	http://amigo.geneontology.org/amigo/term/GO:0000165	PAFAH1B1 CUL3 CUL1 KARS1 ROCK1 PSMD5 PSMD8 CRKL MAPK1 PSMC6 PSMB5 PSMD10 CSK STK3 CAV1 EIF3A LAMTOR3 NFKB1 CRYAB PSMD9 SKP1 PDCD10 GNAI2 GBP1 NQO2 PSMB2 AKAP12 CHI3L1 MAPK8IP3 RPS3 PSMC2 PSMD6 PRKCD PSMC3 MAP2K1 GPS1 DAG1 PSMD1 GRB2 PTPN11 HMGB1 PSMD12 LYN PSMB3 MIF PSMC4 PSME1
5.52300613145618e-06	47	691	2.30888475732427	Heterocycle catabolic process	http://amigo.geneontology.org/amigo/term/GO:0046700	RNASET2 ROCK1 XPO1 RPS5 HNRNPC PSMD5 PSMD8 PSMC6 PSMB5 PSMD10 PPP2R1A BLVRA DCPS PSMD9 RPS12 PSMB2 MGAT1 AMPD3 SYNCRIP DHX9 RPL35 RPS6 SSB RPS8 ALDH1L1 RPS3 AIFM1 PSMC2 PSMD6 PRKCD HMGB2 NUDT5 PSMC3 RNASE3 HINT1 PSMD1 UPP1 H1-0 HMGB1 SND1 PSMD12 RPL10A LSM2 NUDT3 PSMB3 PSMC4 PSME1
0.000995139744610417	46	841	1.85671087854655	Proteolysis involved in cellular protein catabolic process	http://amigo.geneontology.org/amigo/term/GO:0051603	GCLC CUL3 CUL1 TSG101 UBE2K XPO1 NSFL1C PSMD5 PSMD8 PSMC6 PSMB5 CTSZ CHMP4B USP14 PSMD10 UBE2I PPP2CB CAV1 ERLIN1 CTSC PSMD9 USP5 SKP1 UCHL3 IDE PSMB2 PML RNF111 PSMC2 CAPN2 PSMD6 PSMC3 DDB1 PSMD1 TRIM72 RAD23A UBA7 UBE2L3 ISG15 PSMD12 DDI2 RACK1 PSMB3 PSMC4 PSME1 PRKACA
7.53227708958325e-05	46	744	2.09878205491619	Actin cytoskeleton organization	http://amigo.geneontology.org/amigo/term/GO:0030036	PAFAH1B1 WAS EHD2 CUL3 CNN2 RHOA ROCK1 PPM1F SH3BP1 TNNT1 MTPN PRKAR1A MYH3 PLEK STMN1 NCKAP1L CSRP3 DIAPH1 MYH10 SWAP70 DOCK2 ARPC5L RDX TMOD3 MYO1F PAM ADD3 PDLIM3 EPB41 PRKCD CFL2 KRT8 CORO1B TCAP RHOG GRB2 HCLS1 PAK2 FHL3 FMNL1 CD47 PDLIM7 MYH6 MYO1C BRK1 MYH11
0.0429959186304967	45	1034	1.47731946847603	Response to organic cyclic compound	http://amigo.geneontology.org/amigo/term/GO:0014070	GCLC GCLM CYBA RHOA VPS35 DNM2 DPYSL2 MTAP RANBP1 MAPK1 DDX17 CAV1 NFKB1 CRYAB SCGB2A2 PTGES3 PADI2 CASQ2 UFM1 GOT2 PSMB2 DIAPH1 DHX9 CASP1 EPHX1 HSPD1 PAM EIF4E IMPACT AIFM1 CALM3 AGL H2AZ1 HMGB2 DAG1 PAK2 H3C13 UBE2L3 HMGB1 TGM2 FIS1 NME1 LYN CES1 PRKACA
0.000272053180480223	45	764	1.9994088094296	Posttranscriptional regulation of gene expression	http://amigo.geneontology.org/amigo/term/GO:0010608	EIF4B RHOA ROCK1 XPO1 TMED2 HNRNPC PSMD5 PSMD8 MAPK1 PSMC6 PSMB5 PSMD10 MTPN CAV1 EIF3B DCPS PSMD9 TSNAX PSMB2 RAN EIF2S1 SYNCRIP DHX9 NIBAN1 PML SRP9 RPS3 EIF4E IMPACT PSMC2 PSMD6 PRKCD PSMC3 MAP2K1 PA2G4 PPP1CA PSMD1 H3C13 PSMD12 RACK1 TSN LSM2 PSMB3 PSMC4 PSME1
5.16065721319514e-06	45	644	2.37196945714941	Nucleobase-containing compound catabolic process	http://amigo.geneontology.org/amigo/term/GO:0034655	RNASET2 ROCK1 XPO1 RPS5 HNRNPC PSMD5 PSMD8 PSMC6 PSMB5 PSMD10 PPP2R1A DCPS PSMD9 RPS12 PSMB2 MGAT1 AMPD3 SYNCRIP DHX9 RPL35 RPS6 SSB RPS8 RPS3 AIFM1 PSMC2 PSMD6 PRKCD HMGB2 NUDT5 PSMC3 RNASE3 HINT1 PSMD1 UPP1 H1-0 HMGB1 SND1 PSMD12 RPL10A LSM2 NUDT3 PSMB3 PSMC4 PSME1
9.91338712200555e-07	45	601	2.54167775441634	Endomembrane system organization	http://amigo.geneontology.org/amigo/term/GO:0010256	PAFAH1B1 VTA1 EHD2 RAB27A TSG101 DNM2 CHMP5 TMED2 NSFL1C MAPK1 SUN2 CHMP4B VAPA EEA1 UBE2I RAB2A PPP2R1A CAV1 SYNGR2 SNX3 PDCD10 RTN4 PPP1R7 SRGN CSRP3 REEP5 CHMP2A RAN RTN3 DYSF USO1 SNAPIN LBR ASAP1 PRKCD STX3 CAVIN2 MAP2K1 PRNP TRIM72 GET3 DCTN1 CHMP1B NSF CHMP4A
6.08119654006063e-07	45	590	2.58906496678681	Activation of immune response	http://amigo.geneontology.org/amigo/term/GO:0002253	FGR WAS CUL1 XRCC5 FYB1 CD59 PSMD5 PSMD8 CRKL MAPK1 PSMC6 PSMB5 PSMD10 CSK NFKB1 PSMD9 SKP1 GBP1 NCKAP1L PSMB2 RPS3 VSIG4 ICOSLG PSMC2 IFI16 PSMD6 PRKCD PSMC3 FPR1 PRNP PSMD1 GRB2 PAK2 HMGB1 CD47 PSMD12 MYO1C PLCG2 FCGR3A LYN BRK1 PSMB3 PSMC4 PSME1 PRKACA
4.6062028528612e-07	45	584	2.61566494932229	Response to inorganic substance	http://amigo.geneontology.org/amigo/term/GO:0010035	GCLC DNM2 AKR1B1 CPNE3 ATP5F1D RANBP1 MAPK1 EEF1A2 STK24 PPP2CB CAV1 CRYAB PDCD10 ADPRS CASQ2 ALOX5AP EIF2S1 HNRNPA1 ATIC SORD MIEN1 HSPD1 CAMK2D PAM RPS3 QDPR IMPACT AIFM1 CALM3 CAPN2 PRKCD KRT8 PRNP PPP1CA CCS PTPN11 COL18A1 S100A16 DDI2 PLCG2 GDI1 RACK1 FIS1 CUTA PDCD6
0.0686757424289071	44	1045	1.42928498751272	Neuron projection development	http://amigo.geneontology.org/amigo/term/GO:0031175	PAFAH1B1 GRN RHOA ROCK1 DNM2 ARHGAP4 DPYSL2 RANBP1 CRKL MAPK1 CTSZ VAPA STK24 PPP3CB EHD1 SNX3 RTN4 STMN1 NCKAP1L RAB17 MAPK8IP3 SNAPIN TIAM2 ASAP1 IMPACT DPYSL5 STX3 KLK6 MAP2K1 ALCAM KIF5B LAMB2 DAG1 RHOG GRB2 PTPN11 PAK2 HMGB1 PDLIM7 AP2A1 GDI1 NME1 LYN SCARF1
0.050919973318659	44	1018	1.46719333197524	Positive regulation of protein modification process	http://amigo.geneontology.org/amigo/term/GO:0031401	PLAUR CUL3 RHOA UBE2K XRCC5 FKBP1A ERP29 CRKL MAPK1 PSMD10 CSK STK3 CAV1 PRKAR1A SKP1 PDCD10 PRKAR2A PPP1R7 PTPA NCKAP1L NMI UBA2 CHI3L1 IL6ST NIBAN1 PML RPS3 RNF111 CALM3 PRKCD MAP2K1 PRNP DAG1 PTPN11 HCLS1 PAK2 UBE2L3 HMGB1 RACK1 PDCD6 LYN ITGB3 MIF PRKACA
0.00276172380598291	44	839	1.78021789267079	Peptide biosynthetic process	http://amigo.geneontology.org/amigo/term/GO:0043043	GCLC GCLM EIF4B HAGH KARS1 RHOA ROCK1 RPS5 TMED2 MAPK1 EEF1A2 EARS2 MTPN EIF3B EIF3A DCPS RPS12 DARS1 CNDP2 EIF2S1 SYNCRIP DHX9 NIBAN1 RPL35 RPS6 DENR PML RPS8 SRP9 RPS3 EIF4E IMPACT EIF4A1 PA2G4 PPP1CA EIF3F PPA1 NACA RPL10A RACK1 EIF3CL LSM2 EEF1D EEF1B2
0.00060479467656425	44	772	1.93471866833004	Cellular response to nitrogen compound	http://amigo.geneontology.org/amigo/term/GO:1901699	GCLC GCLM CYBA IPO5 ROCK1 VPS35 DNM2 AKR1B1 CHMP5 CRKL MAPK1 CSK CAV1 PRKAR1A LAMTOR3 NFKB1 PRKAR2A GNAI2 ATP6V1A CASQ2 IDE ATP6V1F CSRP3 DIAPH1 LAMTOR5 DHX9 USO1 IMPACT AIFM1 CAPN2 PRKCD FBN1 PRNP TRIM72 GRB2 PTPN11 DDI2 MYO1C APRT TGM2 FIS1 LYN PKLR PRKACA
1.05404182500597e-07	44	532	2.80752408261427	Regulation of response to biotic stimulus	http://amigo.geneontology.org/amigo/term/GO:0002831	FGR GRN CYBA CUL1 IFI35 UBE2K XRCC5 PSMD5 PSMD8 PSMC6 PSMB5 PSMD10 NFKB1 PSMD9 SKP1 NMI PSMB2 FGL2 SPINK5 DHX9 PML HSPD1 TKFC VSIG4 PSMC2 IFI16 PSMD6 PRKCD HMGB2 ERAP1 PSMC3 SERPINB9 PSMD1 PTPN11 PAK2 ISG15 HMGB1 PSMD12 PLCG2 LYN PSMB3 PSMC4 PSME1 PRKACA
0.0571378926013886	43	1001	1.45819909440296	Negative regulation of programmed cell death	http://amigo.geneontology.org/amigo/term/GO:0043069	GCLC HSPB6 PLAUR GCLM GRN RHOA AKR1B1 MAPK1 PSMD10 CAV1 NFKB1 CRYAB DCPS PDCD10 GNAI2 GBE1 UFM1 NCKAP1L GLO1 LAMTOR5 IL6ST RPS6 MIEN1 HSPD1 PF4 PRKCD HMGB2 API5 ACAA2 DDB1 PA2G4 SERPINB9 PRNP HCLS1 PAK2 EVI2B NACA SERPINB13 PLCG2 DDAH2 TXNDC5 SERPINB10 MIF
0.00488507302865029	43	841	1.73562103864134	Positive regulation of hydrolase activity	http://amigo.geneontology.org/amigo/term/GO:0051345	GRN RHOA ARHGEF1 ARHGAP4 RANBP1 CRKL PPM1F SH3BP1 AHSA1 RP2 NAPA CAV1 HSPE1 PLEK PTPA NCKAP1L DOCK2 CASP1 PML HSPD1 TIAM2 RSU1 RPS3 ASAP1 AIFM1 CALM3 IFI16 PRKCD HMGB2 ARHGAP1 RHOG ARHGAP45 HMGB1 PSAP TGM2 GDI1 RACK1 DNAJC9 FIS1 PDCD6 LYN PRTN3 PSME1
0.000337889368247309	43	725	2.01332040482395	Cell cycle phase transition	http://amigo.geneontology.org/amigo/term/GO:0044770	PAFAH1B1 CUL3 CUL1 DYNC1I2 DNM2 PSMD5 PSMD8 PSMC6 PSMB5 MAPRE1 CHMP4B PSMD10 PPP2R1A PSMD9 SKP1 PSMB2 CHMP2A RPS6 RDX TMOD3 PML TIPRL EIF4E CALM3 PSMC2 PSMD6 PSMC3 DDB1 PSMD1 CRLF3 PTPN11 UBE2L3 TUBB4B DYNC1H1 PSMD12 PLCG2 DCTN1 TUBB PSMB3 PSMC4 RCC2 PSME1 PRKACA
0.0107906849823093	42	858	1.66166873548244	Negative regulation of catalytic activity	http://amigo.geneontology.org/amigo/term/GO:0043086	PLAUR MVP IPO5 ROCK1 TSG101 LXN TMED2 RTRAF FKBP1A PPM1F USP14 CSK CAV1 PRKAR1A NFKB1 CRYAB CAND1 PRKAR2A GNAI2 FKBP15 PTPA NCKAP1L SERPINB6 SPINK5 LAMTOR5 RDX PML TIPRL IFI16 PRKCD WFDC12 GPS1 SERPINB9 PRNP PAK2 SERPINB13 RACK1 IPO7 SERPINB5 SERPINB10 LYN RCC2
0.000535291451956212	42	718	1.98567099588292	Response to wounding	http://amigo.geneontology.org/amigo/term/GO:0009611	PLAUR DCN WAS EHD2 GRN CNN2 RHOA RAB27A CD59 MAPK1 STK24 CAV1 PRKAR1A EHD1 PDCD10 PRKAR2A GNAI2 PLEK DYSF PRCP MMRN1 MAPK8IP3 PF4 PRKCD KLK6 MAP2K1 LAMB2 CORO1B DAG1 TRIM72 PTPN11 H3C13 CYP4F2 HMGB1 NACA HBG2 PLCG2 LYN ITGB3 SCARF1 PRTN3 PRKACA
0.000522912982141363	42	717	1.98844041149782	Negative regulation of cellular component organization	http://amigo.geneontology.org/amigo/term/GO:0051129	GCLC PAFAH1B1 WAS RHOA ROCK1 XRCC5 DNM2 ARHGAP4 HNRNPC PFDN4 CTSZ MAPRE1 CHMP4B PSMD10 MTPN CAV1 VAT1 PRKAR1A CRYAB RTN4 STMN1 EML2 SWAP70 HNRNPA1 RDX TMOD3 PML PFDN2 SNAPIN ADD3 IMPACT VBP1 PRKCD ACAA2 PRNP CORO1B PAK2 HMGB1 GDI1 ITGB3 RCC2 CHMP4A
5.15686283224526e-06	42	579	2.46236921423823	Regulation of vesicle-mediated transport	http://amigo.geneontology.org/amigo/term/GO:0060627	FGR EHD2 CYBA CNN2 ROCK1 RAB27A TSG101 STXBP2 DNM2 MAPK1 CSK RAB3D CAV1 SFRP4 PPP3CB RAB5C EHD1 SNX3 GNAI2 NCKAP1L RAB17 CHMP2A DOCK2 DYSF RDX SNAPIN ATG3 CALM3 AP2M1 MAP2K1 KIF5B ARHGAP1 HMGB1 CD47 AP2A1 PLCG2 TGM2 RACK1 LYN ITGB3 NSF PRTN3
0.0555507974608092	41	942	1.47745887111519	Positive regulation of phosphorus metabolic process	http://amigo.geneontology.org/amigo/term/GO:0010562	FGR PLAUR RHOA UBE2K XRCC5 ERP29 CRKL MAPK1 EEF1A2 PSMD10 CSK STK3 CAV1 PRKAR1A PTGES3 PDCD10 PRKAR2A PPP1R7 PLEK PTPA NCKAP1L CHI3L1 IL6ST NIBAN1 RPS3 CALM3 CAPN2 PRKCD MAP2K1 PRNP DAG1 MOB1B PTPN11 HCLS1 PAK2 HMGB1 RACK1 LYN ITGB3 MIF PRKACA
0.0555507974608092	41	942	1.47745887111519	Positive regulation of phosphate metabolic process	http://amigo.geneontology.org/amigo/term/GO:0045937	FGR PLAUR RHOA UBE2K XRCC5 ERP29 CRKL MAPK1 EEF1A2 PSMD10 CSK STK3 CAV1 PRKAR1A PTGES3 PDCD10 PRKAR2A PPP1R7 PLEK PTPA NCKAP1L CHI3L1 IL6ST NIBAN1 RPS3 CALM3 CAPN2 PRKCD MAP2K1 PRNP DAG1 MOB1B PTPN11 HCLS1 PAK2 HMGB1 RACK1 LYN ITGB3 MIF PRKACA
0.0527582695281454	41	937	1.48534285655337	Cytokine production	http://amigo.geneontology.org/amigo/term/GO:0001816	FGR PGLYRP1 LTBP1 CYBA XRCC5 NUTF2 CSK CLC NFKB1 RTN4 IL1R2 GBP1 SRGN NCKAP1L NMI LRRFIP1 AKAP12 CHI3L1 LAMTOR5 IL6ST DHX9 CASP1 PML HSPD1 RPS3 VSIG4 ICOSLG CAPN2 IFI16 PF4 HMGB2 PRNP IL16 PTPN11 UBA7 ISG15 HMGB1 CD47 PLCG2 LYN MIF
0.0483501039783048	41	930	1.49652285654894	Regulation of cytokine production	http://amigo.geneontology.org/amigo/term/GO:0001817	FGR PGLYRP1 LTBP1 CYBA XRCC5 NUTF2 CSK CLC NFKB1 RTN4 IL1R2 GBP1 SRGN NCKAP1L NMI LRRFIP1 AKAP12 CHI3L1 LAMTOR5 IL6ST DHX9 CASP1 PML HSPD1 RPS3 VSIG4 ICOSLG CAPN2 IFI16 PF4 HMGB2 PRNP IL16 PTPN11 UBA7 ISG15 HMGB1 CD47 PLCG2 LYN MIF
0.0245014959379858	41	882	1.5779662773135	Cellular chemical homeostasis	http://amigo.geneontology.org/amigo/term/GO:0055082	GCLC NADK GCLM GRN CYBA CUL1 FKBP1A MAPK1 CAV1 PPP3CB GLRX3 ATP5F1B CAND1 SKP1 ATP6V1A RTN4 CASQ2 ATP6V1F CSRP3 DIAPH1 SWAP70 PML TMCO1 SNAPIN CAMK2D CALM3 KIF5B FPR1 PRNP BOLA2 HMGB1 ATP2A1 ERO1A PLCG2 TGM2 RACK1 FIS1 NME1 LYN CALB2 PRKACA
0.000276830290422393	41	670	2.07726306953807	Carbohydrate metabolic process	http://amigo.geneontology.org/amigo/term/GO:0005975	GCLC H6PD AKR7A2 AKR1B1 GANAB PYGB TPD52L2 MAN2B1 GYS1 NFKB1 MANBA GALNT7 PTGES3 GNPDA1 GBE1 LANCL1 PLEK GLO1 GOT2 FBP2 CHI3L1 CHIT1 IL6ST SORD MAN2C1 PFKL TKFC PFKM AGL BPNT1 NUDT5 DDB1 PGM2 GUSB PPP1CA IDH2 PGP HMGB1 AP2A1 RPE PKLR
6.83941922769228e-06	41	566	2.45895098337546	Regulation of cytoskeleton organization	http://amigo.geneontology.org/amigo/term/GO:0051493	PAFAH1B1 WAS RHOA ROCK1 CHMP5 MAPK1 PPM1F SH3BP1 MAPRE1 CHMP4B MTPN PLEK STMN1 NCKAP1L EML2 CHMP2A CLIP1 DIAPH1 SWAP70 ARPC5L NUMA1 RDX TMOD3 PFDN2 PAM ADD3 RPS3 CAPN2 PRKCD CFL2 CORO1B RHOG GRB2 HCLS1 PAK2 CD47 DYNC1H1 MYO1C DCTN1 BRK1 CHMP1B
3.32997148587499e-06	41	546	2.54902244796797	Immune response-regulating cell surface receptor signaling pathway	http://amigo.geneontology.org/amigo/term/GO:0002768	FGR WAS CUL1 FYB1 PSMD5 PSMD8 CRKL MAPK1 PSMC6 PSMB5 PSMD10 CSK PPP3CB NFKB1 PSMD9 SKP1 GBP1 NCKAP1L PSMB2 RPS3 ICOSLG PSMC2 PSMD6 PRKCD PSMC3 FPR1 PRNP PSMD1 GRB2 PAK2 CD47 PSMD12 MYO1C PLCG2 FCGR3A LYN BRK1 PSMB3 PSMC4 PSME1 PRKACA
3.28955176824312e-08	41	454	3.06556444182932	Positive regulation of defense response	http://amigo.geneontology.org/amigo/term/GO:0031349	GRN CYBA CUL1 KARS1 IFI35 UBE2K XRCC5 PSMD5 PSMD8 PSMC6 PSMB5 PSMD10 NFKB1 CTSC PSMD9 SKP1 NMI PSMB2 ALOX5AP IL6ST DHX9 HSPD1 PSMC2 IFI16 PSMD6 PRKCD HMGB2 PSMC3 IL16 PSMD1 PAK2 HMGB1 CD47 PSMD12 PLCG2 TGM2 LYN PSMB3 PSMC4 PSME1 PRKACA
0.0192671077589297	40	839	1.61837990242799	Ion homeostasis	http://amigo.geneontology.org/amigo/term/GO:0050801	GCLC DCN GCLM GRN CYBA CUL1 FKBP1A MAPK1 CAV1 SFRP4 GLRX3 ATP5F1B CAND1 SKP1 GNAI2 ATP6V1A CASQ2 ATP6V1F CSRP3 DIAPH1 SWAP70 PML TMCO1 SNAPIN CAMK2D CALM3 FPR1 PRNP BOLA2 CYP4F2 HMGB1 ATP2A1 ERO1A PLCG2 TGM2 RACK1 FIS1 LYN CALB2 PRKACA
0.0113743059974312	40	808	1.6804712105657	Translation	http://amigo.geneontology.org/amigo/term/GO:0006412	EIF4B KARS1 RHOA ROCK1 RPS5 TMED2 MAPK1 EEF1A2 EARS2 MTPN EIF3B EIF3A DCPS RPS12 DARS1 EIF2S1 SYNCRIP DHX9 NIBAN1 RPL35 RPS6 DENR PML RPS8 SRP9 RPS3 EIF4E IMPACT EIF4A1 PA2G4 PPP1CA EIF3F PPA1 NACA RPL10A RACK1 EIF3CL LSM2 EEF1D EEF1B2
0.00369639943930108	40	750	1.81042765084944	Protein localization to membrane	http://amigo.geneontology.org/amigo/term/GO:0072657	EHD2 ROCK1 VPS35 FYB1 RPS5 TMED2 CRKL CHMP4B VAPA CSK RAB3D CAV1 EHD1 RPS12 GBP1 SSR1 CSRP3 RPL35 RPS6 RDX RPS8 SRP9 ATG3 RPS3 CALM3 AP2M1 STX3 KIF5B PRNP DAG1 RHOG NACA MYO1C GET3 RPL10A GDI1 RACK1 FIS1 NSF CHMP4A
0.000950886874010227	40	691	1.96500830410576	Cellular response to organonitrogen compound	http://amigo.geneontology.org/amigo/term/GO:0071417	GCLC GCLM CYBA IPO5 ROCK1 VPS35 DNM2 AKR1B1 CHMP5 MAPK1 CSK CAV1 PRKAR1A LAMTOR3 NFKB1 PRKAR2A GNAI2 ATP6V1A CASQ2 IDE ATP6V1F CSRP3 DIAPH1 LAMTOR5 USO1 IMPACT CAPN2 PRKCD FBN1 PRNP TRIM72 GRB2 PTPN11 MYO1C APRT TGM2 FIS1 LYN PKLR PRKACA
3.88528820272086e-05	40	589	2.305298366956	Regulation of cellular protein localization	http://amigo.geneontology.org/amigo/term/GO:1903827	IPO5 KCNAB2 TSG101 XPO1 NSFL1C CRKL MAPK1 PPM1F NUTF2 CSK PDCD10 RTN4 CCT4 GBP1 UFM1 CSRP3 RAN LAMTOR5 CCT7 GLUL NUMA1 RDX PML CCT8 EPB41 AP2M1 CCT3 PRKCD STX3 KIF5B PRNP DAG1 RHOG PTPN11 HCLS1 UBE2L3 MYO1C GDI1 RACK1 FIS1
3.47071878076349e-07	40	477	2.84658435668151	Immune response-activating cell surface receptor signaling pathway	http://amigo.geneontology.org/amigo/term/GO:0002429	FGR WAS CUL1 FYB1 PSMD5 PSMD8 CRKL MAPK1 PSMC6 PSMB5 PSMD10 CSK NFKB1 PSMD9 SKP1 GBP1 NCKAP1L PSMB2 RPS3 ICOSLG PSMC2 PSMD6 PRKCD PSMC3 FPR1 PRNP PSMD1 GRB2 PAK2 CD47 PSMD12 MYO1C PLCG2 FCGR3A LYN BRK1 PSMB3 PSMC4 PSME1 PRKACA
3.47071878076349e-07	40	477	2.84658435668151	Immune response-activating signal transduction	http://amigo.geneontology.org/amigo/term/GO:0002757	FGR WAS CUL1 FYB1 PSMD5 PSMD8 CRKL MAPK1 PSMC6 PSMB5 PSMD10 CSK NFKB1 PSMD9 SKP1 GBP1 NCKAP1L PSMB2 RPS3 ICOSLG PSMC2 PSMD6 PRKCD PSMC3 FPR1 PRNP PSMD1 GRB2 PAK2 CD47 PSMD12 MYO1C PLCG2 FCGR3A LYN BRK1 PSMB3 PSMC4 PSME1 PRKACA
0.0284490421628131	39	837	1.58169082399481	Regulation of cell adhesion	http://amigo.geneontology.org/amigo/term/GO:0030155	PLAUR SLK RHOA ROCK1 DNM2 CCDC80 CRKL PPM1F OLFM4 CSK PPP2R1A CAV1 PRKAR1A GBP1 NCKAP1L FGL2 SPINK5 SWAP70 IL6ST RDX PML HSPD1 RSU1 RPS3 VSIG4 ICOSLG PRKCD STX3 PRNP DAG1 GRB2 PTPN11 PAK2 HMGB1 CD47 TGM2 LYN GFUS RCC2
0.00795372668386101	39	762	1.73736905470296	Transmembrane receptor protein tyrosine kinase signaling pathway	http://amigo.geneontology.org/amigo/term/GO:0007169	FGR PLAUR DCN MVP CYBA RHOA ROCK1 TSG101 CPNE3 EPS15 CRKL MAPK1 NCF4 GNAI2 ATP6V1A RTN4 NCF2 STMN1 RAB14 IDE NCKAP1L EPS15L1 ATP6V1F CSRP3 HNRNPA1 AP2M1 PRKCD SVEP1 TRIM72 GRB2 PTPN11 PAK2 AP2A1 MYO1C PDCD6 LYN BRK1 ITGB3 HNRNPH1
0.00706236797220106	39	756	1.75115769799425	Modification-dependent macromolecule catabolic process	http://amigo.geneontology.org/amigo/term/GO:0043632	GCLC CUL3 CUL1 TSG101 UBE2K XPO1 NSFL1C PSMD5 PSMD8 PSMC6 PSMB5 USP14 PSMD10 UBE2I PPP2CB CAV1 ERLIN1 PSMD9 USP5 SKP1 UCHL3 PSMB2 PML RNF111 PSMC2 PSMD6 PSMC3 DDB1 PSMD1 TRIM72 RAD23A UBA7 UBE2L3 ISG15 PSMD12 RACK1 PSMB3 PSMC4 PSME1
0.00564826656149835	39	745	1.77701371769618	Modification-dependent protein catabolic process	http://amigo.geneontology.org/amigo/term/GO:0019941	GCLC CUL3 CUL1 TSG101 UBE2K XPO1 NSFL1C PSMD5 PSMD8 PSMC6 PSMB5 USP14 PSMD10 UBE2I PPP2CB CAV1 ERLIN1 PSMD9 USP5 SKP1 UCHL3 PSMB2 PML RNF111 PSMC2 PSMD6 PSMC3 DDB1 PSMD1 TRIM72 RAD23A UBA7 UBE2L3 ISG15 PSMD12 RACK1 PSMB3 PSMC4 PSME1
0.000220656735764429	39	615	2.15264263363196	Mitotic cell cycle phase transition	http://amigo.geneontology.org/amigo/term/GO:0044772	PAFAH1B1 CUL3 CUL1 DYNC1I2 DNM2 PSMD5 PSMD8 PSMC6 PSMB5 MAPRE1 CHMP4B PSMD10 PPP2R1A PSMD9 SKP1 PSMB2 CHMP2A RPS6 RDX TMOD3 PML EIF4E CALM3 PSMC2 PSMD6 PSMC3 DDB1 PSMD1 CRLF3 TUBB4B DYNC1H1 PSMD12 DCTN1 TUBB PSMB3 PSMC4 RCC2 PSME1 PRKACA
3.66932594242108e-07	39	459	2.88425973787289	Establishment of organelle localization	http://amigo.geneontology.org/amigo/term/GO:0051656	FGR PAFAH1B1 CUL3 RAB27A STXBP2 DNM2 XPO1 CD59 CHMP5 TMED2 NSFL1C NUDC DPYSL2 SUN2 CTSZ CHMP4B PPP6R1 NAPA CTSC PDCD10 TFG RAB17 CHMP2A RAN NUMA1 USO1 MYO1F SNAPIN KIF5B RAB6A COPG1 DYNC1H1 MYO1C DCTN1 PDCD6 LYN CHMP1B NSF CHMP4A
1.07634428048304e-08	39	401	3.30143446305151	Regulation of innate immune response	http://amigo.geneontology.org/amigo/term/GO:0045088	FGR GRN CUL1 IFI35 UBE2K XRCC5 PSMD5 PSMD8 PSMC6 PSMB5 PSMD10 NFKB1 PSMD9 SKP1 NMI PSMB2 DHX9 TKFC VSIG4 PSMC2 IFI16 PSMD6 PRKCD HMGB2 ERAP1 PSMC3 SERPINB9 PSMD1 PTPN11 PAK2 ISG15 HMGB1 PSMD12 PLCG2 LYN PSMB3 PSMC4 PSME1 PRKACA
0.0303098578032152	38	815	1.58273582973034	Cellular component morphogenesis	http://amigo.geneontology.org/amigo/term/GO:0032989	PAFAH1B1 RHOA ROCK1 DNM2 ARHGAP4 DPYSL2 MAPK1 TNNT1 PPP3CB PRKAR1A MYH3 RTN4 STMN1 NCKAP1L CSRP3 TMOD3 TIAM2 IMPACT DPYSL5 CFL2 MAP2K1 ALCAM KRT8 KIF5B LAMB2 CORO1B DAG1 TCAP RHOG GRB2 PTPN11 PAK2 PDLIM7 MYH6 GDI1 SNX2 FIS1 MYH11
0.00873246878661078	38	741	1.74079581812446	Response to bacterium	http://amigo.geneontology.org/amigo/term/GO:0009617	FGR PGLYRP1 STAB1 DCN GRN CYBA RHOA CHMP5 CCDC80 FKBP5 MAPK1 CAV1 NFKB1 SNX3 RAB14 AKAP12 BPIFA2 CHIT1 SPINK5 CASP1 HSPD1 GBP2 CAPN2 PF4 PRKCD HMGB2 ERAP1 RNASE7 WFDC12 RNASE3 SERPINB9 GBP6 ISG15 HMGB1 ADH5 PLCG2 BPIFA1 LYN
0.00506587077227509	38	715	1.80409748423808	Cellular response to hormone stimulus	http://amigo.geneontology.org/amigo/term/GO:0032870	GCLC GCLM CYBA RHOA ROCK1 DDX17 CSK CAV1 PRKAR1A NFKB1 SCGB2A2 PTGES3 PRKAR2A GNAI2 ATP6V1A PADI2 IDE UFM1 ATP6V1F CSRP3 PRCP RDX USO1 EIF4E AIFM1 PRKCD FBN1 SERPINB9 TRIM72 GRB2 PTPN11 H3C13 UBE2L3 MYO1C APRT LYN PKLR PRKACA
0.000795722743235979	38	637	2.02500738026724	Endocytosis	http://amigo.geneontology.org/amigo/term/GO:0006897	STAB1 EHD2 ROCK1 TSG101 DNM2 EPS15 DPYSL2 MAPK1 SH3BP1 EEA1 CAV1 SFRP4 PPP3CB RAB5C EHD1 CLINT1 FKBP15 CLTA NCKAP1L RAB17 EPS15L1 DOCK2 CALM3 AP2M1 ASGR2 SNCG OLR1 RHOG GRB2 FNBP1 PDLIM7 AP2A1 PLCG2 SNX2 NME1 ITGB3 SCARF1 CANX
0.000289104777782895	38	602	2.14274036749207	Positive regulation of organelle organization	http://amigo.geneontology.org/amigo/term/GO:0010638	PLAUR DCN WAS GRN CUL3 RHOA VPS35 XRCC5 MAPK1 PPM1F MAPRE1 CCT4 PLEK NCKAP1L CLIP1 SWAP70 HNRNPA1 CCT7 ARPC5L NUMA1 PML PFDN2 RPS3 ASAP1 CCT8 CCT3 CFL2 KIF5B CORO1B GRB2 HCLS1 SEPTIN9 CD47 DYNC1H1 MYO1C DCTN1 FIS1 BRK1
0.0133943879672899	37	738	1.70187558641843	Ubiquitin-dependent protein catabolic process	http://amigo.geneontology.org/amigo/term/GO:0006511	GCLC CUL3 CUL1 TSG101 UBE2K XPO1 NSFL1C PSMD5 PSMD8 PSMC6 PSMB5 USP14 PSMD10 UBE2I PPP2CB CAV1 ERLIN1 PSMD9 USP5 SKP1 UCHL3 PSMB2 PML RNF111 PSMC2 PSMD6 PSMC3 DDB1 PSMD1 TRIM72 RAD23A UBE2L3 PSMD12 RACK1 PSMB3 PSMC4 PSME1
0.00872334695227269	37	715	1.75662123465287	Tissue morphogenesis	http://amigo.geneontology.org/amigo/term/GO:0048729	PAFAH1B1 RHOA TMED2 FKBP1A PSMD5 PSMD8 SH3BP1 PSMC6 PSMB5 CTSZ PSMD10 STK3 PRKAR1A PSMD9 PDCD10 PSMB2 PML PSMC2 AP2M1 PSMD6 PSMC3 IRX2 PPP1CA DAG1 PSMD1 TCAP GRB2 AP2A1 PSMD12 MYH6 TXNRD1 TGM2 SERPINB5 ITGB3 PSMB3 PSMC4 PSME1
0.0496577123150439	36	793	1.54103236358559	Inorganic ion homeostasis	http://amigo.geneontology.org/amigo/term/GO:0098771	GRN CYBA CUL1 FKBP1A MAPK1 CAV1 SFRP4 GLRX3 ATP5F1B CAND1 SKP1 GNAI2 ATP6V1A CASQ2 ATP6V1F CSRP3 DIAPH1 SWAP70 PML TMCO1 SNAPIN CAMK2D CALM3 FPR1 PRNP BOLA2 CYP4F2 HMGB1 ATP2A1 ERO1A PLCG2 TGM2 FIS1 LYN CALB2 PRKACA
0.00473049844456259	36	661	1.84877256327288	Regulation of cell projection organization	http://amigo.geneontology.org/amigo/term/GO:0031344	PAFAH1B1 WAS GRN RHOA VPS35 DNM2 ARHGAP4 DPYSL2 RANBP1 CRKL CTSZ STK24 CAV1 EHD1 SNX3 RTN4 RAB17 RDX MIEN1 SNAPIN ATG3 TIAM2 PRKCD KLK6 MAP2K1 PRNP CORO1B RHOG PAK2 SEPTIN9 AP2A1 GDI1 NME1 LYN BRK1 SCARF1
0.00434336503004309	36	657	1.86002840840696	Nucleobase-containing small molecule metabolic process	http://amigo.geneontology.org/amigo/term/GO:0055086	NADK KARS1 RHOA DLD ATP5F1D MTAP MAPK1 ATP5F1B GNPDA1 ATP6V1A ABHD14B PAICS PUDP MGAT1 RAN AMPD3 ATIC PFKL ATP5F1A PFKM ATP5MC3 BPNT1 NUDT2 NUDT5 HINT1 FASN NADSYN1 IDH2 UPP1 ADSS1 TXNRD1 APRT NME1 PKLR NUDT3 GFUS
0.00417811327452838	36	655	1.86570788446317	Apoptotic signaling pathway	http://amigo.geneontology.org/amigo/term/GO:0097190	GCLC PLAUR GCLM CUL3 CUL1 UBE2K ERP29 PPM1F PSMD10 STK24 STK3 CAV1 CTSC TMEM109 PDCD10 GNAI2 CASP1 PML RPS3 AIFM1 IFI16 PF4 PRKCD HMGB2 ACAA2 HINT1 KRT8 PPP1CA TNFRSF10C PAK2 ATP2A1 ERO1A RACK1 FIS1 PDCD6 MIF
0.00318713962985236	36	644	1.89757556571953	Regulation of plasma membrane bounded cell projection organization	http://amigo.geneontology.org/amigo/term/GO:0120035	PAFAH1B1 WAS GRN RHOA VPS35 DNM2 ARHGAP4 DPYSL2 RANBP1 CRKL CTSZ STK24 CAV1 EHD1 SNX3 RTN4 RAB17 RDX MIEN1 SNAPIN ATG3 TIAM2 PRKCD KLK6 MAP2K1 PRNP CORO1B RHOG PAK2 SEPTIN9 AP2A1 GDI1 NME1 LYN BRK1 SCARF1
0.00134487824236729	36	609	2.0066316327149	Regulation of establishment of protein localization	http://amigo.geneontology.org/amigo/term/GO:0070201	NADK IPO5 TSG101 XPO1 ERP29 MAPK1 PPM1F NUTF2 CSK PPP3CB PSMD9 SNX3 PDCD10 CCT4 UFM1 RAN MYH10 CCT7 GLUL HADH PFKL PAM PFKM CCT8 CCT3 PRKCD KIF5B PRNP PTPN11 HCLS1 IDH2 UBE2L3 MYO1C GDI1 RACK1 FIS1
0.0600552918949298	35	781	1.52124602544167	Cation homeostasis	http://amigo.geneontology.org/amigo/term/GO:0055080	GRN CYBA CUL1 FKBP1A MAPK1 CAV1 GLRX3 ATP5F1B CAND1 SKP1 GNAI2 ATP6V1A CASQ2 ATP6V1F CSRP3 DIAPH1 SWAP70 PML TMCO1 SNAPIN CAMK2D CALM3 FPR1 PRNP BOLA2 CYP4F2 HMGB1 ATP2A1 ERO1A PLCG2 TGM2 FIS1 LYN CALB2 PRKACA
0.00786523037432901	35	659	1.80287275549309	Cell division	http://amigo.geneontology.org/amigo/term/GO:0051301	PAFAH1B1 CUL3 RHOA ROCK1 TSG101 CHMP5 NUDC MAPRE1 CHMP4B UBE2I SMC3 GNAI2 STMN1 CLTA SEPTIN6 CHMP2A RAN MYH10 NUMA1 SEPTIN11 HDGF RPS3 EPB41 CALM3 PPP1CA SEPTIN9 EVI2B DYNC1H1 TOP1 RACK1 DCTN1 TUBB CHMP1B RCC2 CHMP4A
0.00182851018581223	35	597	1.99010577197646	Positive regulation of cellular component biogenesis	http://amigo.geneontology.org/amigo/term/GO:0044089	WAS RHOA ROCK1 TSG101 DNM2 PPM1F PSMC6 MAPRE1 CAV1 CAND1 PLEK NCKAP1L CHMP2A CLIP1 SWAP70 ARPC5L NUMA1 MIEN1 RPS3 ASAP1 PSMC2 PSMC3 DDB1 CORO1B DAG1 GRB2 PTPN11 SEPTIN9 CD47 DYNC1H1 MYO1C RACK1 DCTN1 BRK1 PSMC4
0.00134126412805167	35	585	2.03092845447854	Regulation of cell cycle phase transition	http://amigo.geneontology.org/amigo/term/GO:1901987	PAFAH1B1 CUL3 CUL1 DYNC1I2 PSMD5 PSMD8 PSMC6 PSMB5 MAPRE1 PSMD10 PPP2R1A PSMD9 SKP1 PSMB2 RDX TMOD3 PML TIPRL PSMC2 PSMD6 PSMC3 DDB1 PSMD1 PTPN11 TUBB4B DYNC1H1 PSMD12 PLCG2 DCTN1 TUBB PSMB3 PSMC4 RCC2 PSME1 PRKACA
0.00126657479389602	35	583	2.0378956189879	Wound healing	http://amigo.geneontology.org/amigo/term/GO:0042060	PLAUR DCN WAS EHD2 CNN2 RHOA RAB27A CD59 MAPK1 CAV1 PRKAR1A EHD1 PDCD10 PRKAR2A GNAI2 PLEK DYSF PRCP MMRN1 PF4 PRKCD CORO1B DAG1 TRIM72 PTPN11 H3C13 CYP4F2 HMGB1 NACA HBG2 PLCG2 LYN ITGB3 PRTN3 PRKACA
9.22535315602813e-05	35	501	2.37144340493003	RNA catabolic process	http://amigo.geneontology.org/amigo/term/GO:0006401	RNASET2 ROCK1 XPO1 RPS5 HNRNPC PSMD5 PSMD8 PSMC6 PSMB5 PSMD10 PPP2R1A DCPS PSMD9 RPS12 PSMB2 SYNCRIP DHX9 RPL35 RPS6 SSB RPS8 RPS3 PSMC2 PSMD6 PRKCD PSMC3 RNASE3 PSMD1 SND1 PSMD12 RPL10A LSM2 PSMB3 PSMC4 PSME1
7.28019217676077e-05	35	495	2.40018817347464	Regulation of protein-containing complex assembly	http://amigo.geneontology.org/amigo/term/GO:0043254	WAS RHOA PSMC6 MAPRE1 NAPA MTPN CRYAB CAND1 PLEK STMN1 NCKAP1L EML2 CLIP1 ARPC5L NUMA1 RDX TMOD3 ADD3 RPS3 ASAP1 IMPACT PSMC2 PRKCD PSMC3 DDB1 CORO1B GRB2 PTPN11 HCLS1 HMGB1 MYO1C RACK1 DCTN1 BRK1 PSMC4
6.86114400659948e-06	35	442	2.68799354269219	Golgi vesicle transport	http://amigo.geneontology.org/amigo/term/GO:0048193	CUL3 DYNC1I2 DNM2 CD59 EPS15 TMED2 CTSZ VAPA RP2 CSK RAB2A PPP6R1 NAPA COPE CTSC SNX3 CLINT1 TFG RAB14 COPA CLTA CHMP2A ARF3 USO1 RAB6A COPG1 AP1S2 AP2A1 DYNC1H1 RACK1 DCTN1 SNX2 TXNDC5 PDCD6 NSF
0.0317190722231464	34	710	1.62556003861482	Positive regulation of cell death	http://amigo.geneontology.org/amigo/term/GO:0010942	GRN HEBP2 RHOA ARHGEF1 DNM2 CTSZ EEF1A2 STK3 CAV1 SFRP4 CTSC PTPA IFIT2 NQO2 AKAP12 EIF2S1 RPS6 PML HSPD1 CAMK2D TIAM2 RPS3 AIFM1 CAPN2 PRKCD PRNP PPP1CA TNFRSF10C PAK2 HMGB1 TGM2 RACK1 FIS1 LYN
0.0281792608926242	34	702	1.64408493933977	Taxis	http://amigo.geneontology.org/amigo/term/GO:0042330	PLAUR RHOA DPYSL2 CRKL MAPK1 PPM1F USP14 PADI2 NCKAP1L SWAP70 DOCK2 DPYSL5 PF4 PRKCD HMGB2 STX3 MAP2K1 RNASE3 ALCAM KIF5B FPR1 LAMB2 IL16 CORO1B OXSR1 DAG1 RHOG GRB2 PTPN11 HMGB1 PDLIM7 LYN ITGB3 MIF
0.026687975493801	34	699	1.65114109787771	Chemotaxis	http://amigo.geneontology.org/amigo/term/GO:0006935	PLAUR RHOA DPYSL2 CRKL MAPK1 PPM1F USP14 PADI2 NCKAP1L SWAP70 DOCK2 DPYSL5 PF4 PRKCD HMGB2 STX3 MAP2K1 RNASE3 ALCAM KIF5B FPR1 LAMB2 IL16 CORO1B OXSR1 DAG1 RHOG GRB2 PTPN11 HMGB1 PDLIM7 LYN ITGB3 MIF
0.0184469999467231	34	677	1.70479708628733	Cell surface receptor signaling pathway involved in cell-cell signaling	http://amigo.geneontology.org/amigo/term/GO:1905114	CUL3 CUL1 RHOA VPS35 PSMD5 PSMD8 PSMC6 PSMB5 PSMD10 STK3 PPP2R1A CAV1 SFRP4 PPP3CB NFKB1 PSMD9 VPS29 SNX3 SKP1 PSMB2 PSMC2 AP2M1 PSMD6 PSMC3 DDB1 PPP1CA PSMD1 AP2A1 PSMD12 PLCG2 RACK1 PSMB3 PSMC4 PSME1
0.0113352905005758	34	652	1.77016507272472	Regulation of mitotic cell cycle	http://amigo.geneontology.org/amigo/term/GO:0007346	PAFAH1B1 CUL3 CUL1 DYNC1I2 PSMD5 PSMD8 PSMC6 PSMB5 MAPRE1 PSMD10 PPP2R1A PSMD9 SKP1 PSMB2 RDX TMOD3 PML EIF4E PSMC2 PSMD6 PSMC3 DDB1 PSMD1 PTPN11 TUBB4B DYNC1H1 PSMD12 DCTN1 TUBB PSMB3 PSMC4 RCC2 PSME1 PRKACA
0.00172786116910976	34	571	2.02127430370669	Generation of precursor metabolites and energy	http://amigo.geneontology.org/amigo/term/GO:0006091	H6PD CYBA AKR7A2 RHOA AKR1B1 DLD FH ATP5F1D ACO2 PYGB GYS1 ATP5F1B PTGES3 GNPDA1 GBE1 NCF2 IDE NQO2 IL6ST PFKL QDPR ATP5F1A PFKM ATP5MC3 AGL UQCRFS1 PGM2 PPP1CA IDH2 HMGB1 RPE ADH5 PKLR GFUS
0.001705137084146	34	570	2.02482039897635	Cell-cell signaling by wnt	http://amigo.geneontology.org/amigo/term/GO:0198738	CUL3 CUL1 RHOA VPS35 PSMD5 PSMD8 PSMC6 PSMB5 PSMD10 STK3 PPP2R1A CAV1 SFRP4 PPP3CB NFKB1 PSMD9 VPS29 SNX3 SKP1 PSMB2 PSMC2 AP2M1 PSMD6 PSMC3 DDB1 PPP1CA PSMD1 AP2A1 PSMD12 PLCG2 RACK1 PSMB3 PSMC4 PSME1
0.00162700069654661	34	568	2.03195004826852	Wnt signaling pathway	http://amigo.geneontology.org/amigo/term/GO:0016055	CUL3 CUL1 RHOA VPS35 PSMD5 PSMD8 PSMC6 PSMB5 PSMD10 STK3 PPP2R1A CAV1 SFRP4 PPP3CB NFKB1 PSMD9 VPS29 SNX3 SKP1 PSMB2 PSMC2 AP2M1 PSMD6 PSMC3 DDB1 PPP1CA PSMD1 AP2A1 PSMD12 PLCG2 RACK1 PSMB3 PSMC4 PSME1
0.00121929599744352	34	558	2.06836492368552	Proteasomal protein catabolic process	http://amigo.geneontology.org/amigo/term/GO:0010498	GCLC CUL3 CUL1 UBE2K XPO1 NSFL1C PSMD5 PSMD8 PSMC6 PSMB5 USP14 PSMD10 PPP2CB CAV1 ERLIN1 PSMD9 USP5 SKP1 PSMB2 PML PSMC2 PSMD6 PSMC3 DDB1 PSMD1 TRIM72 RAD23A PSMD12 DDI2 RACK1 PSMB3 PSMC4 PSME1 PRKACA
0.000959608768725139	34	549	2.10227254538528	Regulation of body fluid levels	http://amigo.geneontology.org/amigo/term/GO:0050878	PLAUR WAS EHD2 CYBA RAB27A CD59 AKR1B1 MAPK1 CAV1 PRKAR1A EHD1 PRKAR2A GNAI2 PLEK STMN1 COPA GOT2 PRCP MMRN1 PAM PF4 PRKCD PTPN11 H3C13 CYP4F2 HBG2 PLCG2 BPIFA1 APRT NME1 LYN ITGB3 PRTN3 PRKACA
4.73410299203402e-06	34	412	2.80132919275854	Regulation of supramolecular fiber organization	http://amigo.geneontology.org/amigo/term/GO:1902903	WAS RHOA ROCK1 PPM1F SH3BP1 PFDN4 MAPRE1 MTPN AEBP1 CRYAB PLEK STMN1 NCKAP1L EML2 CLIP1 SWAP70 ARPC5L NUMA1 RDX TMOD3 PFDN2 ADD3 RPS3 VBP1 PRKCD CFL2 CORO1B GRB2 HCLS1 PAK2 CD47 MYO1C DCTN1 BRK1
2.3803580859571e-06	34	398	2.89986841059427	Antigen processing and presentation	http://amigo.geneontology.org/amigo/term/GO:0019882	WAS CYBA RAB27A DYNC1I2 DNM2 PSMD5 PSMD8 NCF4 PSMC6 PSMB5 PSMD10 PSMD9 NCF2 IDE CLTA PSMB2 FGL2 PSMC2 AP2M1 PSMD6 ERAP1 PSMC3 PSMD1 RAB6A AP1S2 AP2A1 DYNC1H1 PSMD12 DCTN1 IFI30 PSMB3 PSMC4 CANX PSME1
1.05404182500597e-07	34	344	3.35508031225733	Positive regulation of response to biotic stimulus	http://amigo.geneontology.org/amigo/term/GO:0002833	GRN CYBA CUL1 IFI35 UBE2K XRCC5 PSMD5 PSMD8 PSMC6 PSMB5 PSMD10 NFKB1 PSMD9 SKP1 NMI PSMB2 DHX9 HSPD1 PSMC2 IFI16 PSMD6 PRKCD HMGB2 PSMC3 PSMD1 PAK2 HMGB1 PSMD12 PLCG2 LYN PSMB3 PSMC4 PSME1 PRKACA
0.0551017983895197	33	719	1.55800015154811	Cellular ion homeostasis	http://amigo.geneontology.org/amigo/term/GO:0006873	GRN CYBA CUL1 FKBP1A MAPK1 CAV1 GLRX3 ATP5F1B CAND1 SKP1 ATP6V1A CASQ2 ATP6V1F CSRP3 DIAPH1 SWAP70 PML TMCO1 SNAPIN CAMK2D CALM3 FPR1 PRNP BOLA2 HMGB1 ATP2A1 ERO1A PLCG2 TGM2 FIS1 LYN CALB2 PRKACA
0.0441853371701297	33	704	1.59119617750439	Cellular cation homeostasis	http://amigo.geneontology.org/amigo/term/GO:0030003	GRN CYBA CUL1 FKBP1A MAPK1 CAV1 GLRX3 ATP5F1B CAND1 SKP1 ATP6V1A CASQ2 ATP6V1F CSRP3 DIAPH1 SWAP70 PML TMCO1 SNAPIN CAMK2D CALM3 FPR1 PRNP BOLA2 HMGB1 ATP2A1 ERO1A PLCG2 TGM2 FIS1 LYN CALB2 PRKACA
0.0149077032830296	33	640	1.75031579525483	Positive regulation of programmed cell death	http://amigo.geneontology.org/amigo/term/GO:0043068	GRN RHOA ARHGEF1 DNM2 CTSZ EEF1A2 STK3 CAV1 SFRP4 CTSC PTPA IFIT2 NQO2 AKAP12 EIF2S1 RPS6 PML HSPD1 CAMK2D TIAM2 RPS3 AIFM1 CAPN2 PRKCD PRNP PPP1CA TNFRSF10C PAK2 HMGB1 TGM2 RACK1 FIS1 LYN
0.0109563354423071	33	625	1.79232337434095	Positive regulation of apoptotic process	http://amigo.geneontology.org/amigo/term/GO:0043065	GRN RHOA ARHGEF1 DNM2 CTSZ EEF1A2 STK3 CAV1 SFRP4 CTSC PTPA IFIT2 NQO2 AKAP12 EIF2S1 RPS6 PML HSPD1 CAMK2D TIAM2 RPS3 AIFM1 CAPN2 PRKCD PRNP PPP1CA TNFRSF10C PAK2 HMGB1 TGM2 RACK1 FIS1 LYN
0.00901521763201878	33	615	1.82146684384243	Cellular component disassembly	http://amigo.geneontology.org/amigo/term/GO:0022411	PAFAH1B1 VTA1 TSG101 CHMP5 SH3BP1 NAPA MTPN CAV1 PLEK PADI2 STMN1 UFM1 CHMP2A SWAP70 RDX TMOD3 DENR SNAPIN ATG3 ADD3 AIFM1 CAPN2 HMGB2 CFL2 KIF5B TPSAB1 PPP1CA H1-0 HMGB1 DCTN1 FIS1 CHMP1B NSF
0.00255029763359938	33	562	1.99324218676707	Response to peptide	http://amigo.geneontology.org/amigo/term/GO:1901652	GCLC CYBA ROCK1 AKR1B1 CHMP5 CSK CAV1 PRKAR1A NFKB1 PRKAR2A GNAI2 ATP6V1A SRSF4 IDE GOT2 ATP6V1F CSRP3 USO1 HADH QDPR PRKCD FBN1 PRNP DAG1 TRIM72 GRB2 PTPN11 MYO1C APRT FIS1 LYN PKLR PRKACA
1.46884033126869e-06	33	370	3.02757326746782	Vesicle organization	http://amigo.geneontology.org/amigo/term/GO:0016050	PAFAH1B1 VTA1 CUL3 RAB27A TSG101 DNM2 CD59 EPS15 CHMP5 TMED2 CTSZ CHMP4B VAPA EEA1 PPP6R1 NAPA CAV1 CTSC SNX3 TFG RAB14 SRGN CHMP2A DYSF USO1 SNAPIN AP2M1 STX3 KIF5B PDCD6 CHMP1B NSF CHMP4A
0.0126163925883268	32	606	1.79250262460341	Morphogenesis of an epithelium	http://amigo.geneontology.org/amigo/term/GO:0002009	PAFAH1B1 RHOA TMED2 PSMD5 PSMD8 SH3BP1 PSMC6 PSMB5 CTSZ PSMD10 STK3 PSMD9 PDCD10 PSMB2 PML PSMC2 AP2M1 PSMD6 PSMC3 IRX2 PPP1CA DAG1 PSMD1 TCAP GRB2 AP2A1 PSMD12 TGM2 SERPINB5 PSMB3 PSMC4 PSME1
0.0104754150793673	32	597	1.81952527723562	Positive regulation of locomotion	http://amigo.geneontology.org/amigo/term/GO:0040017	FGR GRN RHOA CPNE3 CRKL MAPK1 PPM1F SUN2 MAPRE1 CAV1 ATP5F1B PDCD10 GNAI2 RTN4 NCKAP1L AKAP12 DIAPH1 SWAP70 RDX MIEN1 ATP5F1A STX3 IL16 OXSR1 HMGB1 MYO1C PLCG2 RACK1 PDCD6 LYN ITGB3 GFUS
0.00999420419243457	32	595	1.82564132858767	Positive regulation of cellular component movement	http://amigo.geneontology.org/amigo/term/GO:0051272	FGR GRN RHOA CPNE3 CRKL MAPK1 PPM1F SUN2 MAPRE1 CAV1 ATP5F1B PDCD10 GNAI2 RTN4 STMN1 NCKAP1L AKAP12 DIAPH1 SWAP70 RDX MIEN1 ATP5F1A OXSR1 HMGB1 ATP2A1 MYO1C PLCG2 RACK1 PDCD6 LYN ITGB3 GFUS
0.00739347680752611	32	581	1.86963268590304	Regulation of protein transport	http://amigo.geneontology.org/amigo/term/GO:0051223	NADK IPO5 TSG101 XPO1 ERP29 MAPK1 PPM1F NUTF2 CSK PPP3CB PSMD9 SNX3 PDCD10 UFM1 RAN MYH10 GLUL HADH PFKL PAM PFKM PRKCD KIF5B PRNP PTPN11 HCLS1 IDH2 UBE2L3 MYO1C GDI1 RACK1 FIS1
0.00123776682662632	32	512	2.12159490333919	Regulation of peptidase activity	http://amigo.geneontology.org/amigo/term/GO:0052547	PLAUR GRN RHOA ROCK1 LXN PPM1F USP14 CAV1 CRYAB HSPE1 SERPINB6 SPINK5 LAMTOR5 CASP1 PML HSPD1 RPS3 AIFM1 IFI16 WFDC12 SERPINB9 PRNP PAK2 HMGB1 SERPINB13 RACK1 SERPINB5 FIS1 SERPINB10 PDCD6 LYN PSME1
0.000792625736879489	32	497	2.18562694267538	Proteasome-mediated ubiquitin-dependent protein catabolic process	http://amigo.geneontology.org/amigo/term/GO:0043161	GCLC CUL3 CUL1 UBE2K XPO1 NSFL1C PSMD5 PSMD8 PSMC6 PSMB5 USP14 PSMD10 PPP2CB CAV1 ERLIN1 PSMD9 USP5 SKP1 PSMB2 PML PSMC2 PSMD6 PSMC3 DDB1 PSMD1 TRIM72 RAD23A PSMD12 RACK1 PSMB3 PSMC4 PSME1
0.000440214646410128	32	479	2.26775906160682	Regulation of mitotic cell cycle phase transition	http://amigo.geneontology.org/amigo/term/GO:1901990	PAFAH1B1 CUL3 CUL1 DYNC1I2 PSMD5 PSMD8 PSMC6 PSMB5 MAPRE1 PSMD10 PPP2R1A PSMD9 SKP1 PSMB2 RDX TMOD3 PML PSMC2 PSMD6 PSMC3 DDB1 PSMD1 TUBB4B DYNC1H1 PSMD12 DCTN1 TUBB PSMB3 PSMC4 RCC2 PSME1 PRKACA
0.000239440323489058	32	461	2.3563049685676	Negative regulation of transport	http://amigo.geneontology.org/amigo/term/GO:0051051	CNN2 VPS35 ERP29 PPM1F CSK CAV1 SFRP4 NFKB1 CRYAB PSMD9 SNX3 GNAI2 CASQ2 UFM1 DYSF HADH PFKL ATG3 CAMK2D CALM3 OXSR1 ARHGAP1 PTPN11 IDH2 CYP4F2 HMGB1 CD47 GDI1 RACK1 FIS1 ITGB3 PRTN3
0.000219551544234306	32	458	2.37173928058879	MRNA catabolic process	http://amigo.geneontology.org/amigo/term/GO:0006402	ROCK1 XPO1 RPS5 HNRNPC PSMD5 PSMD8 PSMC6 PSMB5 PSMD10 PPP2R1A DCPS PSMD9 RPS12 PSMB2 SYNCRIP DHX9 RPL35 RPS6 SSB RPS8 RPS3 PSMC2 PSMD6 PRKCD PSMC3 PSMD1 PSMD12 RPL10A LSM2 PSMB3 PSMC4 PSME1
1.09634051884306e-05	32	392	2.77106273089201	Post-translational protein modification	http://amigo.geneontology.org/amigo/term/GO:0043687	CUL3 LTBP1 CUL1 BPIFB2 PSMD5 PSMD8 PSMC6 PSMB5 PSMD10 RAB2A PSMD9 CAND1 SKP1 UCHL3 PSMB2 COPS4 COPS7B PSMC2 PSMD6 PSMC3 FBN1 COPS2 DDB1 COPS6 GPS1 LAMB2 PSMD1 PSMD12 PSMB3 PSMC4 PSME1 FAM20C
1.01365973971554e-07	32	308	3.52680711204437	Phagocytosis	http://amigo.geneontology.org/amigo/term/GO:0006909	FGR WAS CYBA CNN2 RAB27A DNM2 MAPK1 SH3BP1 NCF4 CSK SNX3 NCF2 RAB14 NCKAP1L DOCK2 DYSF ATG3 PRKCD RHOG GRB2 HMGB1 CD47 MYO1C PLCG2 TGM2 FCGR3A RACK1 TXNDC5 LYN BRK1 ITGB3 PRTN3
1.19565925787117e-11	32	216	5.02896569680401	Fc receptor signaling pathway	http://amigo.geneontology.org/amigo/term/GO:0038093	FGR WAS CUL1 PSMD5 PSMD8 MAPK1 PSMC6 PSMB5 PSMD10 PPP3CB NFKB1 PSMD9 SKP1 NCKAP1L PSMB2 PSMC2 PSMD6 PRKCD PSMC3 PSMD1 GRB2 PAK2 CD47 PSMD12 MYO1C PLCG2 FCGR3A LYN BRK1 PSMB3 PSMC4 PSME1
0.0171495518560738	31	596	1.76562260412121	Negative regulation of protein modification process	http://amigo.geneontology.org/amigo/term/GO:0031400	GCLC MVP IPO5 ROCK1 TSG101 TMED2 RTRAF FKBP1A CRKL PPM1F PPP2R1A CAV1 PRKAR1A PRKAR2A GNAI2 PTPA NCKAP1L SWAP70 NIBAN1 TIPRL RPS3 IMPACT CALM3 PRKCD OTUB1 PRNP PAK2 ISG15 RACK1 IPO7 LYN
0.012091304388298	31	579	1.81746299146155	Nucleoside phosphate metabolic process	http://amigo.geneontology.org/amigo/term/GO:0006753	NADK KARS1 RHOA DLD ATP5F1D MAPK1 ATP5F1B ATP6V1A ABHD14B PAICS PUDP RAN AMPD3 ATIC PFKL ATP5F1A PFKM ATP5MC3 BPNT1 NUDT2 NUDT5 HINT1 FASN NADSYN1 IDH2 UPP1 ADSS1 APRT NME1 PKLR NUDT3
0.00944365253525605	31	567	1.85592781667767	Nucleotide metabolic process	http://amigo.geneontology.org/amigo/term/GO:0009117	NADK KARS1 RHOA DLD ATP5F1D MAPK1 ATP5F1B ATP6V1A ABHD14B PAICS PUDP RAN AMPD3 ATIC PFKL ATP5F1A PFKM ATP5MC3 BPNT1 NUDT2 NUDT5 HINT1 FASN NADSYN1 IDH2 UPP1 ADSS1 APRT NME1 PKLR NUDT3
0.00919925022702022	31	566	1.85920684108876	Establishment of protein localization to organelle	http://amigo.geneontology.org/amigo/term/GO:0072594	IPO5 TSG101 RPS5 MAPK1 CHMP4B NUTF2 RPS12 CCT4 UFM1 RAN CCT7 RPL35 RPS6 PML RPS8 SRP9 HSPD1 RPS3 CCT8 AIFM1 CALM3 CCT3 PRKCD HCLS1 UBE2L3 KPNA4 GET3 RPL10A IPO7 FIS1 CHMP4A
0.0044062329484076	31	535	1.96693658328269	Regulation of anatomical structure size	http://amigo.geneontology.org/amigo/term/GO:0090066	GCLC PAFAH1B1 WAS GCLM RHOA ROCK1 DNM2 ARHGAP4 DPYSL2 SH3BP1 MTPN CAV1 RTN4 PLEK NCKAP1L SWAP70 LAMTOR5 ARPC5L RDX TMOD3 ADD3 AP2M1 PRKCD CFL2 PPP1CA CORO1B GRB2 HCLS1 MYO1C GDI1 BRK1
4.46358757080566e-05	31	400	2.6307776801406	Cellular amino acid metabolic process	http://amigo.geneontology.org/amigo/term/GO:0006520	GCLC GCLM KARS1 DLD PSMD5 PSMD8 MTAP PSMC6 PSMB5 PSMD10 SMS EARS2 PSMD9 DARS1 GOT2 PSMB2 GLUL QDPR PSMC2 PM20D1 PSMD6 PSMC3 PSMD1 PPA1 ADSS1 PSMD12 DDAH2 PSMB3 PSMC4 PSME1 MSRA
9.91338712200555e-07	31	326	3.22794807379214	Antigen receptor-mediated signaling pathway	http://amigo.geneontology.org/amigo/term/GO:0050851	WAS CUL1 FYB1 PSMD5 PSMD8 CRKL MAPK1 PSMC6 PSMB5 PSMD10 CSK NFKB1 PSMD9 SKP1 GBP1 NCKAP1L PSMB2 RPS3 ICOSLG PSMC2 PSMD6 PSMC3 PRNP PSMD1 PAK2 PSMD12 PLCG2 LYN PSMB3 PSMC4 PSME1
1.4880630043673e-07	31	297	3.54313492274828	Positive regulation of innate immune response	http://amigo.geneontology.org/amigo/term/GO:0045089	CUL1 IFI35 UBE2K XRCC5 PSMD5 PSMD8 PSMC6 PSMB5 PSMD10 NFKB1 PSMD9 SKP1 NMI PSMB2 DHX9 PSMC2 IFI16 PSMD6 PRKCD HMGB2 PSMC3 PSMD1 PAK2 HMGB1 PSMD12 PLCG2 LYN PSMB3 PSMC4 PSME1 PRKACA
0.0690803090289005	30	653	1.55951845880982	Cellular response to organic cyclic compound	http://amigo.geneontology.org/amigo/term/GO:0071407	GCLC GCLM CYBA RHOA VPS35 DNM2 RANBP1 MAPK1 DDX17 CAV1 NFKB1 SCGB2A2 PTGES3 PADI2 CASQ2 UFM1 DIAPH1 DHX9 EIF4E IMPACT AIFM1 H2AZ1 DAG1 PAK2 H3C13 UBE2L3 TGM2 FIS1 CES1 PRKACA
0.0259296777454673	30	592	1.72021208378853	Positive regulation of transferase activity	http://amigo.geneontology.org/amigo/term/GO:0051347	FGR RHOA XRCC5 MAPK1 EEF1A2 PSMD10 UBE2I CSK STK3 PRKAR1A PTGES3 SKP1 PDCD10 PRKAR2A CCT4 NCKAP1L CHI3L1 RPS3 CALM3 PRKCD MAP2K1 PRNP DAG1 MOB1B PAK2 UBE2L3 HMGB1 LYN ITGB3 PRKACA
0.021288906020398	30	581	1.7527806430341	Positive regulation of cell motility	http://amigo.geneontology.org/amigo/term/GO:2000147	FGR GRN RHOA CPNE3 CRKL MAPK1 PPM1F SUN2 MAPRE1 CAV1 ATP5F1B PDCD10 GNAI2 RTN4 NCKAP1L AKAP12 DIAPH1 SWAP70 RDX MIEN1 ATP5F1A OXSR1 HMGB1 MYO1C PLCG2 RACK1 PDCD6 LYN ITGB3 GFUS
0.0127216560541188	30	556	1.83159272230722	Positive regulation of cell migration	http://amigo.geneontology.org/amigo/term/GO:0030335	FGR GRN RHOA CPNE3 CRKL MAPK1 PPM1F SUN2 MAPRE1 CAV1 ATP5F1B PDCD10 GNAI2 RTN4 NCKAP1L AKAP12 DIAPH1 SWAP70 RDX MIEN1 ATP5F1A OXSR1 HMGB1 MYO1C PLCG2 RACK1 PDCD6 LYN ITGB3 GFUS
0.00918315646666152	30	541	1.88237625434901	Negative regulation of phosphorus metabolic process	http://amigo.geneontology.org/amigo/term/GO:0010563	MVP IPO5 ROCK1 TSG101 TMED2 RTRAF FKBP1A CRKL PPM1F CSK PPP2R1A CAV1 PRKAR1A PRKAR2A GNAI2 PLEK FKBP15 PTPA NCKAP1L SWAP70 NIBAN1 TIPRL IMPACT CALM3 PRKCD PRNP PAK2 RACK1 IPO7 LYN
0.00899330431967681	30	540	1.8858621363015	Negative regulation of phosphate metabolic process	http://amigo.geneontology.org/amigo/term/GO:0045936	MVP IPO5 ROCK1 TSG101 TMED2 RTRAF FKBP1A CRKL PPM1F CSK PPP2R1A CAV1 PRKAR1A PRKAR2A GNAI2 PLEK FKBP15 PTPA NCKAP1L SWAP70 NIBAN1 TIPRL IMPACT CALM3 PRKCD PRNP PAK2 RACK1 IPO7 LYN
0.00249263565227057	30	490	2.078297048169	Response to oxidative stress	http://amigo.geneontology.org/amigo/term/GO:0006979	GCLC GCLM CYBA MAPK1 NCF4 PSMB5 STK24 PPP2CB CRYAB PDCD10 LANCL1 NCF2 ADPRS EIF2S1 PML HSPD1 RPS3 IMPACT AIFM1 CAPN2 PRKCD NUDT2 PRNP OXSR1 CCS PTPN11 ERO1A TXNRD1 RACK1 MSRA
0.00211265044004131	30	484	2.10406106116283	Regulation of endopeptidase activity	http://amigo.geneontology.org/amigo/term/GO:0052548	PLAUR RHOA ROCK1 LXN PPM1F USP14 CRYAB HSPE1 SERPINB6 SPINK5 LAMTOR5 CASP1 PML HSPD1 RPS3 AIFM1 IFI16 WFDC12 SERPINB9 PRNP PAK2 HMGB1 SERPINB13 RACK1 SERPINB5 FIS1 SERPINB10 PDCD6 LYN PSME1
0.000247433711065142	30	419	2.43046671504251	Response to oxygen levels	http://amigo.geneontology.org/amigo/term/GO:0070482	CYBA RHOA PSMD5 PSMD8 PSMC6 PSMB5 PSMD10 CAV1 CRYAB PSMD9 ATP6V1A RTN4 PSMB2 CASP1 PML HSPD1 PAM AIFM1 PSMC2 CAPN2 PSMD6 PSMC3 ACAA2 PSMD1 PSMD12 ERO1A FIS1 PSMB3 PSMC4 PSME1
0.000234505656027906	30	417	2.44212362974295	Regulation of actin filament-based process	http://amigo.geneontology.org/amigo/term/GO:0032970	WAS CNN2 RHOA ROCK1 PPM1F SH3BP1 MTPN CAV1 PLEK STMN1 NCKAP1L CSRP3 SWAP70 ARPC5L RDX TMOD3 CAMK2D PAM ADD3 PRKCD CFL2 CORO1B RHOG GRB2 HCLS1 PAK2 ATP2A1 CD47 MYO1C BRK1
1.6707787993063e-06	30	317	3.21250963281644	Antigen processing and presentation of peptide antigen	http://amigo.geneontology.org/amigo/term/GO:0048002	CYBA DYNC1I2 DNM2 PSMD5 PSMD8 NCF4 PSMC6 PSMB5 PSMD10 PSMD9 NCF2 IDE CLTA PSMB2 PSMC2 AP2M1 PSMD6 ERAP1 PSMC3 PSMD1 AP1S2 AP2A1 DYNC1H1 PSMD12 DCTN1 IFI30 PSMB3 PSMC4 CANX PSME1
0.0665689585728975	29	623	1.58012846733449	Small molecule biosynthetic process	http://amigo.geneontology.org/amigo/term/GO:0044283	H6PD AKR1B1 SPTLC1 MTAP ERLIN1 NFKB1 PTGES3 PLEK ACAT2 GOT2 PUDP FBP2 RAN ALOX5AP GSTM1 GLUL SORD LBR QDPR CBR1 ACAA2 DDB1 FASN UPP1 PGP PLCG2 APRT CES1 MIF
0.00296518003873446	29	473	2.08122628995642	Response to peptide hormone	http://amigo.geneontology.org/amigo/term/GO:0043434	GCLC CYBA ROCK1 CSK CAV1 PRKAR1A NFKB1 PRKAR2A GNAI2 ATP6V1A SRSF4 IDE GOT2 ATP6V1F CSRP3 USO1 HADH QDPR PRKCD FBN1 DAG1 TRIM72 GRB2 PTPN11 MYO1C APRT LYN PKLR PRKACA
0.00169350995238826	29	453	2.17311266037392	Small molecule catabolic process	http://amigo.geneontology.org/amigo/term/GO:0044282	HAGH DLD GNPDA1 ACAT2 NQO2 GOT2 MGAT1 GLUL HADH ESD SORD PFKL ALDH1L1 TKFC QDPR PFKM BPNT1 NUDT5 ACAA2 ECI1 PGM2 UPP1 CYP4F2 RPE ADH5 DDAH2 PKLR NUDT3 SCARF1
0.000959608768725139	29	435	2.2630345635618	Regulation of mRNA metabolic process	http://amigo.geneontology.org/amigo/term/GO:1903311	ROCK1 XPO1 HNRNPC PSMD5 PSMD8 DDX17 PSMC6 PSMB5 PSMD10 DCPS PSMD9 CPSF6 SRSF3 SRSF4 PSMB2 RBM39 SYNCRIP HNRNPA1 DHX9 PSMC2 PSMD6 PRKCD PSMC3 PSMD1 PSMD12 LSM2 PSMB3 PSMC4 PSME1
0.000289104777782895	29	402	2.44880605758553	Response to tumor necrosis factor	http://amigo.geneontology.org/amigo/term/GO:0034612	CYBA UBE2K PSMD5 PSMD8 MAPK1 PSMC6 PSMB5 PSMD10 NFKB1 PSMD9 GBP1 PSMB2 TXNDC17 AKAP12 CHI3L1 DHX9 CASP1 RPS3 PSMC2 GBP2 PSMD6 PSMC3 KRT8 PSMD1 PSMD12 RACK1 PSMB3 PSMC4 PSME1
0.000193619145574932	29	391	2.51769829961479	Response to decreased oxygen levels	http://amigo.geneontology.org/amigo/term/GO:0036293	CYBA RHOA PSMD5 PSMD8 PSMC6 PSMB5 PSMD10 CAV1 CRYAB PSMD9 RTN4 PSMB2 CASP1 PML HSPD1 PAM AIFM1 PSMC2 CAPN2 PSMD6 PSMC3 ACAA2 PSMD1 PSMD12 ERO1A FIS1 PSMB3 PSMC4 PSME1
9.97669394791847e-05	29	376	2.61813839135475	Regulation of intracellular transport	http://amigo.geneontology.org/amigo/term/GO:0032386	EHD2 IPO5 XPO1 MAPK1 NUTF2 CRYAB EHD1 CPSF6 SNX3 PDCD10 UFM1 REEP5 RAN DHX9 NUMA1 RDX PRKCD MAP2K1 KIF5B PRNP ARHGAP1 PTPN11 HCLS1 UBE2L3 ATP2A1 DYNC1H1 MYO1C GDI1 FIS1
8.74658415426252e-05	29	373	2.63919580469004	Cellular response to tumor necrosis factor	http://amigo.geneontology.org/amigo/term/GO:0071356	CYBA UBE2K PSMD5 PSMD8 MAPK1 PSMC6 PSMB5 PSMD10 NFKB1 PSMD9 GBP1 PSMB2 TXNDC17 AKAP12 CHI3L1 DHX9 CASP1 RPS3 PSMC2 GBP2 PSMD6 PSMC3 KRT8 PSMD1 PSMD12 RACK1 PSMB3 PSMC4 PSME1
3.53379833399766e-06	29	311	3.16533773359931	Cell cycle G2/M phase transition	http://amigo.geneontology.org/amigo/term/GO:0044839	PAFAH1B1 CUL1 DYNC1I2 DNM2 PSMD5 PSMD8 PSMC6 PSMB5 MAPRE1 PSMD10 PPP2R1A PSMD9 SKP1 PSMB2 CALM3 PSMC2 PSMD6 PSMC3 PSMD1 TUBB4B DYNC1H1 PSMD12 DCTN1 TUBB PSMB3 PSMC4 RCC2 PSME1 PRKACA
1.75271086653635e-06	29	300	3.28140011716462	G2/M transition of mitotic cell cycle	http://amigo.geneontology.org/amigo/term/GO:0000086	PAFAH1B1 CUL1 DYNC1I2 DNM2 PSMD5 PSMD8 PSMC6 PSMB5 MAPRE1 PSMD10 PPP2R1A PSMD9 SKP1 PSMB2 CALM3 PSMC2 PSMD6 PSMC3 PSMD1 TUBB4B DYNC1H1 PSMD12 DCTN1 TUBB PSMB3 PSMC4 RCC2 PSME1 PRKACA
3.66932594242108e-07	29	276	3.56673925778763	T cell receptor signaling pathway	http://amigo.geneontology.org/amigo/term/GO:0050852	WAS CUL1 FYB1 PSMD5 PSMD8 CRKL MAPK1 PSMC6 PSMB5 PSMD10 CSK NFKB1 PSMD9 SKP1 GBP1 PSMB2 RPS3 ICOSLG PSMC2 PSMD6 PSMC3 PRNP PSMD1 PAK2 PSMD12 PLCG2 PSMB3 PSMC4 PSME1
0.077555807421236	28	607	1.56585587594062	Organic hydroxy compound metabolic process	http://amigo.geneontology.org/amigo/term/GO:1901615	H6PD AKR7A2 HAGH AKR1B1 SPTLC1 ACO2 MTPN ERLIN1 MINPP1 NFKB1 PLEK ACAT2 RAN SORD LBR TKFC QDPR BPNT1 PLB1 ACAA2 IDH2 PGP CYP4F2 ADH5 PLCG2 CES1 NUDT3 SCARF1
0.00481460747088664	28	467	2.03527733767871	Actin filament organization	http://amigo.geneontology.org/amigo/term/GO:0007015	WAS CUL3 RHOA ROCK1 PPM1F SH3BP1 MTPN PLEK STMN1 NCKAP1L DIAPH1 SWAP70 ARPC5L RDX TMOD3 MYO1F ADD3 PRKCD CFL2 CORO1B TCAP RHOG GRB2 HCLS1 PAK2 CD47 MYO1C BRK1
0.00123776682662632	28	421	2.25765918455097	Cellular response to peptide	http://amigo.geneontology.org/amigo/term/GO:1901653	GCLC CYBA ROCK1 AKR1B1 CHMP5 CSK CAV1 PRKAR1A NFKB1 PRKAR2A GNAI2 ATP6V1A IDE ATP6V1F CSRP3 USO1 PRKCD FBN1 PRNP TRIM72 GRB2 PTPN11 MYO1C APRT FIS1 LYN PKLR PRKACA
0.000243748468182021	28	376	2.5278577571701	Response to hypoxia	http://amigo.geneontology.org/amigo/term/GO:0001666	CYBA RHOA PSMD5 PSMD8 PSMC6 PSMB5 PSMD10 CAV1 CRYAB PSMD9 RTN4 PSMB2 CASP1 PML HSPD1 PAM PSMC2 CAPN2 PSMD6 PSMC3 ACAA2 PSMD1 PSMD12 ERO1A FIS1 PSMB3 PSMC4 PSME1
6.26730992233894e-05	28	346	2.74703617542184	Protein modification by small protein removal	http://amigo.geneontology.org/amigo/term/GO:0070646	RHOA PSMD5 PSMD8 PSMC6 PSMB5 USP14 PSMD10 PSMD9 USP5 SNX3 UCHL3 PSMB2 COPS4 COPS7B PSMC2 PSMD6 PSMC3 COPS2 OTUB1 COPS6 GPS1 PSMD1 EIF3F RAD23A PSMD12 PSMB3 PSMC4 PSME1
4.50271697546785e-05	28	340	2.79551328439988	Protein polymerization	http://amigo.geneontology.org/amigo/term/GO:0051258	WAS RHOA UBE2K DNM2 MAPRE1 CHMP4B MTPN STMN1 CASQ2 NCKAP1L EML2 CHMP2A CLIP1 DIAPH1 ARPC5L NUMA1 RDX TMOD3 ADD3 RPS3 PRKCD CORO1B GRB2 HCLS1 MYO1C DCTN1 BRK1 CHMP4A
6.86114400659948e-06	28	306	3.10612587155542	Antigen processing and presentation of exogenous antigen	http://amigo.geneontology.org/amigo/term/GO:0019884	CYBA DYNC1I2 DNM2 PSMD5 PSMD8 NCF4 PSMC6 PSMB5 PSMD10 PSMD9 NCF2 CLTA PSMB2 PSMC2 AP2M1 PSMD6 PSMC3 PSMD1 AP1S2 AP2A1 DYNC1H1 PSMD12 DCTN1 IFI30 PSMB3 PSMC4 CANX PSME1
4.73410299203402e-06	28	298	3.18951180099315	Antigen processing and presentation of exogenous peptide antigen	http://amigo.geneontology.org/amigo/term/GO:0002478	CYBA DYNC1I2 DNM2 PSMD5 PSMD8 NCF4 PSMC6 PSMB5 PSMD10 PSMD9 NCF2 CLTA PSMB2 PSMC2 AP2M1 PSMD6 PSMC3 PSMD1 AP1S2 AP2A1 DYNC1H1 PSMD12 DCTN1 IFI30 PSMB3 PSMC4 CANX PSME1
0.0378163944695384	27	535	1.71313831447202	Ribonucleoprotein complex biogenesis	http://amigo.geneontology.org/amigo/term/GO:0022613	EIF4B XRCC5 XPO1 RPS5 SF3A1 SNRPD3 DDX17 PIN4 EIF3B EIF3A PTGES3 CPSF6 SNRPB RAN GLUL DHX9 RPL35 RPS6 DENR RPS8 LUC7L2 PA2G4 EIF3F SF3A3 RPL10A EIF3CL LSM2
0.0186351511611584	27	499	1.83673145940387	Negative regulation of hydrolase activity	http://amigo.geneontology.org/amigo/term/GO:0051346	PLAUR IPO5 ROCK1 LXN TMED2 FKBP1A USP14 CRYAB GNAI2 FKBP15 PTPA NCKAP1L SERPINB6 SPINK5 LAMTOR5 RDX TIPRL IFI16 WFDC12 GPS1 SERPINB9 PRNP PAK2 SERPINB13 SERPINB5 SERPINB10 RCC2
0.00488507302865029	27	444	2.06425450054624	Regulation of protein catabolic process	http://amigo.geneontology.org/amigo/term/GO:0042176	GCLC ROCK1 VPS35 UBE2K XPO1 PSMC6 EEF1A2 USP14 PSMD10 CAV1 CTSC USP5 SNX3 IDE RDX PML PSMC2 PSMC3 DDB1 PSMD1 RAD23A SF3B3 RACK1 NSF PSMC4 PSME1 PRKACA
0.00418226133424707	27	438	2.09253195945783	Viral life cycle	http://amigo.geneontology.org/amigo/term/GO:0019058	VTA1 TSG101 DYNC1I2 XPO1 EPS15 CHMP5 CHMP4B VAPA EEA1 CAV1 CBX1 SNX3 IDE CHMP2A RAN LAMTOR5 PML RBBP4 IFI16 DDB1 DAG1 RAD23A ISG15 DYNC1H1 CHMP1B ITGB3 CHMP4A
0.00159800427874428	27	406	2.25746058680426	Regulation of cellular component size	http://amigo.geneontology.org/amigo/term/GO:0032535	PAFAH1B1 WAS RHOA DNM2 ARHGAP4 DPYSL2 SH3BP1 MTPN RTN4 PLEK NCKAP1L SWAP70 LAMTOR5 ARPC5L RDX TMOD3 ADD3 AP2M1 PRKCD CFL2 PPP1CA CORO1B GRB2 HCLS1 MYO1C GDI1 BRK1
0.000574749584028233	27	377	2.43111140117382	Regulation of binding	http://amigo.geneontology.org/amigo/term/GO:0051098	PLAUR ROCK1 FKBP1A CTSZ MAPRE1 STK3 PPP2CB CAV1 STMN1 IDE IFIT2 RAN EIF2S1 LAMTOR5 DHX9 SNAPIN EPB41 CALM3 IFI16 PRKCD HMGB2 PPP1CA H1-0 HMGB1 RACK1 NME1 PRKACA
7.76560615118726e-06	27	290	3.16044482152597	Cellular ketone metabolic process	http://amigo.geneontology.org/amigo/term/GO:0042180	H6PD AKR7A2 HAGH AKR1B1 PSMD5 PSMD8 PSMC6 PSMB5 PSMD10 CAV1 ERLIN1 PSMD9 NQO2 GLO1 GOT2 PSMB2 CBR1 PSMC2 PSMD6 PSMC3 PSMD1 CYP4F2 PSMD12 CES1 PSMB3 PSMC4 PSME1
7.56325519370274e-07	27	252	3.63701983429576	Response to interleukin-1	http://amigo.geneontology.org/amigo/term/GO:0070555	GCLC CYBA CUL1 PSMD5 PSMD8 PSMC6 PSMB5 PSMD10 NFKB1 PSMD9 SKP1 IL1R2 GBP1 PSMB2 AKAP12 CHI3L1 PSMC2 GBP2 PSMD6 PSMC3 OTUB1 PSMD1 CD47 PSMD12 PSMB3 PSMC4 PSME1
6.47702712089353e-07	27	250	3.66611599297012	Regulation of cell cycle G2/M phase transition	http://amigo.geneontology.org/amigo/term/GO:1902749	PAFAH1B1 CUL1 DYNC1I2 PSMD5 PSMD8 PSMC6 PSMB5 MAPRE1 PSMD10 PPP2R1A PSMD9 SKP1 PSMB2 PSMC2 PSMD6 PSMC3 PSMD1 TUBB4B DYNC1H1 PSMD12 DCTN1 TUBB PSMB3 PSMC4 RCC2 PSME1 PRKACA
3.44846982862314e-07	27	241	3.80302488897316	Regulation of G2/M transition of mitotic cell cycle	http://amigo.geneontology.org/amigo/term/GO:0010389	PAFAH1B1 CUL1 DYNC1I2 PSMD5 PSMD8 PSMC6 PSMB5 MAPRE1 PSMD10 PPP2R1A PSMD9 SKP1 PSMB2 PSMC2 PSMD6 PSMC3 PSMD1 TUBB4B DYNC1H1 PSMD12 DCTN1 TUBB PSMB3 PSMC4 RCC2 PSME1 PRKACA
0.0757570515050349	26	551	1.60178489979874	Dephosphorylation	http://amigo.geneontology.org/amigo/term/GO:0016311	ROCK1 FKBP1A PPM1F RPRD1B PPP2CB PPP6R1 PPP2R1A PPP3CB MINPP1 GNAI2 PPP1R7 PLEK FKBP15 PTPA NCKAP1L PUDP FBP2 SWAP70 TIPRL CALM3 BPNT1 PRKCD UBLCP1 PPP1CA PTPN11 PGP
0.0595476486399866	26	536	1.64661096975579	Regulation of GTPase activity	http://amigo.geneontology.org/amigo/term/GO:0043087	PAFAH1B1 IPO5 ARHGEF1 TMED2 ARHGAP4 RANBP1 CRKL SH3BP1 RP2 STMN1 NCKAP1L EIF2S1 DOCK2 RDX TIAM2 RSU1 ASAP1 GPS1 ARHGAP1 RHOG ARHGAP45 TGM2 GDI1 RACK1 PRTN3 RCC2
0.0578607110273962	26	534	1.65277805203952	Negative regulation of cell cycle	http://amigo.geneontology.org/amigo/term/GO:0045786	CUL1 IPO5 PSMD5 PSMD8 PSMC6 PSMB5 PSMD10 PRKAR1A PSMD9 SKP1 CBX3 PSMB2 CHMP2A PML TIPRL PSMC2 RBBP4 PSMD6 PSMC3 PSMD1 PTPN11 PSMD12 IPO7 PSMB3 PSMC4 PSME1
0.0571378926013886	26	533	1.65587894894766	Axon development	http://amigo.geneontology.org/amigo/term/GO:0061564	PAFAH1B1 GRN RHOA DNM2 ARHGAP4 DPYSL2 MAPK1 STK24 PPP3CB RTN4 STMN1 MAPK8IP3 TIAM2 DPYSL5 MAP2K1 ALCAM KIF5B LAMB2 DAG1 RHOG GRB2 PTPN11 PAK2 PDLIM7 GDI1 SCARF1
0.0429133555683786	26	516	1.71043310036648	Positive regulation of cell adhesion	http://amigo.geneontology.org/amigo/term/GO:0045785	PLAUR RHOA ROCK1 DNM2 CCDC80 CRKL PPM1F OLFM4 CSK CAV1 NCKAP1L IL6ST HSPD1 RSU1 RPS3 ICOSLG STX3 DAG1 GRB2 PTPN11 PAK2 HMGB1 CD47 TGM2 LYN GFUS
0.0101960841651647	26	448	1.97005241024354	Muscle system process	http://amigo.geneontology.org/amigo/term/GO:0003012	HSPB6 CYBA RHOA ROCK1 TNNT1 MTPN CAV1 GLRX3 MYH3 CRYAB CASQ2 CSRP3 MYH8 IL6ST DYSF TMOD3 CAMK2D CALM3 DAG1 TCAP TRIM72 ATP2A1 MYH6 MYH4 MYH11 PRKACA
0.00901521763201878	26	443	1.99228776476096	Regulation of small molecule metabolic process	http://amigo.geneontology.org/amigo/term/GO:0062012	H6PD PSMD5 PSMD8 PSMC6 PSMB5 PSMD10 CAV1 ERLIN1 NFKB1 PSMD9 PLEK PSMB2 RAN PSMC2 PSMD6 PSMC3 DDB1 PPP1CA PSMD1 PGP HMGB1 PSMD12 CES1 PSMB3 PSMC4 PSME1
0.00505447303142635	26	422	2.09143004689361	Positive regulation of proteolysis	http://amigo.geneontology.org/amigo/term/GO:0045862	GCLC GRN RHOA PPM1F PSMC6 PSMD10 CAV1 CTSC USP5 HSPE1 CASP1 PML HSPD1 RPS3 AIFM1 PSMC2 IFI16 PSMC3 RAD23A HMGB1 RACK1 FIS1 PDCD6 LYN PSMC4 PSME1
0.00118055833865563	26	375	2.35355594610428	Cellular response to chemical stress	http://amigo.geneontology.org/amigo/term/GO:0062197	CYBA XRCC5 AKR1B1 MAPK1 NCF4 STK24 CAV1 PDCD10 LANCL1 NCF2 ADPRS SERPINB6 EIF2S1 PML RPS3 IMPACT AIFM1 PRKCD NUDT2 OXSR1 CCS PTPN11 ERO1A TXNRD1 RACK1 MSRA
3.62693825654079e-06	26	258	3.42086620073296	Protein folding	http://amigo.geneontology.org/amigo/term/GO:0006457	HSPB6 GRN FKBP1A ERP29 GANAB LTBP4 NUDC FKBP5 AHSA1 PFDN4 RP2 CRYAB PTGES3 GNAI2 CCT4 HSPE1 CCT7 PFDN2 HSPD1 VBP1 CCT8 CCT3 AHSP ERO1A PPIL3 CANX
2.92374169846949e-09	26	177	4.98634734344126	Activation of innate immune response	http://amigo.geneontology.org/amigo/term/GO:0002218	CUL1 XRCC5 PSMD5 PSMD8 PSMC6 PSMB5 PSMD10 NFKB1 PSMD9 SKP1 PSMB2 PSMC2 IFI16 PSMD6 PRKCD PSMC3 PSMD1 PAK2 HMGB1 PSMD12 PLCG2 LYN PSMB3 PSMC4 PSME1 PRKACA
0.0634873052668212	25	513	1.65426503184342	RNA splicing	http://amigo.geneontology.org/amigo/term/GO:0008380	RTRAF SF3B2 HNRNPC HNRNPH3 SF3A1 SNRPD3 DDX17 PPP2R1A DCPS SRSF3 SRSF4 SNRPB LSM8 RBM39 SRRM1 SYNCRIP HNRNPA1 DHX9 LUC7L2 HNRNPA3 SF3A3 SF3B3 LSM2 PPIL3 HNRNPH1
0.0273141020531332	25	467	1.81721190864171	Ribose phosphate metabolic process	http://amigo.geneontology.org/amigo/term/GO:0019693	RHOA DLD ATP5F1D ATP5F1B ATP6V1A ABHD14B PAICS RAN AMPD3 ATIC PFKL ATP5F1A PFKM ATP5MC3 BPNT1 NUDT2 NUDT5 HINT1 FASN UPP1 ADSS1 APRT NME1 PKLR NUDT3
0.00944818890382194	25	421	2.01576712906336	Establishment of protein localization to membrane	http://amigo.geneontology.org/amigo/term/GO:0090150	VPS35 RPS5 CHMP4B VAPA CSK RPS12 SSR1 RPL35 RPS6 RPS8 SRP9 ATG3 RPS3 CALM3 STX3 PRNP NACA MYO1C GET3 RPL10A GDI1 RACK1 FIS1 NSF CHMP4A
0.00576837927368011	25	403	2.1058013928925	Alcohol metabolic process	http://amigo.geneontology.org/amigo/term/GO:0006066	H6PD AKR7A2 AKR1B1 SPTLC1 ACO2 ERLIN1 MINPP1 NFKB1 PLEK ACAT2 RAN SORD LBR TKFC QDPR BPNT1 PLB1 ACAA2 IDH2 PGP ADH5 PLCG2 CES1 NUDT3 SCARF1
0.00443904183156484	25	394	2.15390345516669	Protein-DNA complex subunit organization	http://amigo.geneontology.org/amigo/term/GO:0071824	PSMD5 PSMD8 PSMC6 PSMB5 PSMD10 PSMD9 CAND1 PSMB2 ANP32E PSMC2 RBBP4 PSMD6 HMGB2 PSMC3 DDB1 PSMD1 H3C13 H1-10 NAP1L1 H1-0 HMGB1 PSMD12 PSMB3 PSMC4 PSME1
0.00418986616062451	25	392	2.16489275850938	Non-membrane-bounded organelle assembly	http://amigo.geneontology.org/amigo/term/GO:0140694	RHOA XRCC5 RPS5 CHMP5 MAPRE1 CHMP4B TNNT1 SMC3 PRKAR1A MYH3 CSRP3 CHMP2A EIF2S1 NUMA1 TMOD3 RPS3 ASAP1 CFL2 KRT8 TCAP DYNC1H1 MYH6 CHMP1B MYH11 FITM1
0.00262506361032335	25	378	2.2450739717875	Coagulation	http://amigo.geneontology.org/amigo/term/GO:0050817	PLAUR WAS EHD2 RAB27A CD59 MAPK1 CAV1 PRKAR1A EHD1 PRKAR2A GNAI2 PLEK PRCP MMRN1 PF4 PRKCD PTPN11 H3C13 CYP4F2 HBG2 PLCG2 LYN ITGB3 PRTN3 PRKACA
0.00255029763359938	25	377	2.25102907516095	Hemostasis	http://amigo.geneontology.org/amigo/term/GO:0007599	PLAUR WAS EHD2 RAB27A CD59 MAPK1 CAV1 PRKAR1A EHD1 PRKAR2A GNAI2 PLEK PRCP MMRN1 PF4 PRKCD PTPN11 H3C13 CYP4F2 HBG2 PLCG2 LYN ITGB3 PRTN3 PRKACA
0.00255029763359938	25	377	2.25102907516095	Regulation of actin cytoskeleton organization	http://amigo.geneontology.org/amigo/term/GO:0032956	WAS RHOA ROCK1 PPM1F SH3BP1 MTPN PLEK STMN1 NCKAP1L SWAP70 ARPC5L RDX TMOD3 PAM ADD3 PRKCD CFL2 CORO1B RHOG GRB2 HCLS1 PAK2 CD47 MYO1C BRK1
0.00231118076831014	25	373	2.27516879714659	Blood coagulation	http://amigo.geneontology.org/amigo/term/GO:0007596	PLAUR WAS EHD2 RAB27A CD59 MAPK1 CAV1 PRKAR1A EHD1 PRKAR2A GNAI2 PLEK PRCP MMRN1 PF4 PRKCD PTPN11 H3C13 CYP4F2 HBG2 PLCG2 LYN ITGB3 PRTN3 PRKACA
0.00100051755885039	25	349	2.4316273963773	Maintenance of location	http://amigo.geneontology.org/amigo/term/GO:0051235	PAFAH1B1 LTBP1 CYBA FKBP1A SUN2 PSMD10 CAV1 NFKB1 EHD1 SKP1 CASQ2 SRGN DIAPH1 PML CAMK2D CALM3 FBN1 ATP2A1 ERO1A PLCG2 LYN ITGB3 CES1 FITM1 PRKACA
0.000379225000099244	25	325	2.6111937271867	Positive regulation of cellular protein localization	http://amigo.geneontology.org/amigo/term/GO:1903829	IPO5 TSG101 MAPK1 NUTF2 RTN4 CCT4 RAN LAMTOR5 CCT7 NUMA1 RDX PML CCT8 EPB41 CCT3 PRKCD STX3 KIF5B PRNP RHOG HCLS1 UBE2L3 MYO1C RACK1 FIS1
1.22499227670926e-06	25	225	3.77172427260301	Cellular response to interleukin-1	http://amigo.geneontology.org/amigo/term/GO:0071347	CUL1 PSMD5 PSMD8 PSMC6 PSMB5 PSMD10 NFKB1 PSMD9 SKP1 IL1R2 GBP1 PSMB2 AKAP12 CHI3L1 PSMC2 GBP2 PSMD6 PSMC3 OTUB1 PSMD1 CD47 PSMD12 PSMB3 PSMC4 PSME1
0.0760952351970582	24	498	1.63592860016516	Regulation of inflammatory response	http://amigo.geneontology.org/amigo/term/GO:0050727	FGR PGLYRP1 GRN KARS1 IFI35 VPS35 PRKAR1A NFKB1 CTSC PRKAR2A NMI ALOX5AP IL6ST DHX9 CASP1 HSPD1 PRKCD IL16 CD47 PLCG2 TGM2 FCGR3A LYN PRKACA
0.069713653843894	24	492	1.65587894894766	Purine-containing compound metabolic process	http://amigo.geneontology.org/amigo/term/GO:0072521	RHOA DLD ATP5F1D MTAP ATP5F1B ATP6V1A ABHD14B PAICS RAN AMPD3 ATIC PFKL ATP5F1A PFKM ATP5MC3 BPNT1 NUDT2 HINT1 FASN ADSS1 APRT NME1 PKLR NUDT3
0.0363302755231806	24	456	1.7866062343909	Ribonucleotide metabolic process	http://amigo.geneontology.org/amigo/term/GO:0009259	RHOA DLD ATP5F1D ATP5F1B ATP6V1A ABHD14B PAICS RAN AMPD3 ATIC PFKL ATP5F1A PFKM ATP5MC3 BPNT1 NUDT2 HINT1 FASN UPP1 ADSS1 APRT NME1 PKLR NUDT3
0.0295374314536191	24	446	1.82666467013957	Negative regulation of cell cycle process	http://amigo.geneontology.org/amigo/term/GO:0010948	CUL1 PSMD5 PSMD8 PSMC6 PSMB5 PSMD10 PRKAR1A PSMD9 SKP1 CBX3 PSMB2 CHMP2A PML TIPRL PSMC2 RBBP4 PSMD6 PSMC3 PSMD1 PTPN11 PSMD12 PSMB3 PSMC4 PSME1
0.0228133673563415	24	433	1.8815067964948	Protein targeting	http://amigo.geneontology.org/amigo/term/GO:0006605	RAB27A RPS5 CHMP4B RPS12 LTBP2 SSR1 RPL35 RPS6 PML RPS8 SRP9 HSPD1 ATG3 RPS3 AIFM1 PRNP UBE2L3 NACA MYO1C GET3 RPL10A GDI1 FIS1 CHMP4A
0.0101245246268162	24	400	2.03673110720562	Regulation of Wnt signaling pathway	http://amigo.geneontology.org/amigo/term/GO:0030111	CUL3 PSMD5 PSMD8 PSMC6 PSMB5 PSMD10 STK3 PPP2R1A CAV1 SFRP4 NFKB1 PSMD9 SNX3 PSMB2 PSMC2 PSMD6 PSMC3 PPP1CA PSMD1 PSMD12 RACK1 PSMB3 PSMC4 PSME1
0.00589714424648666	24	381	2.13830037501903	Protein polyubiquitination	http://amigo.geneontology.org/amigo/term/GO:0000209	CUL3 CUL1 UBE2K PSMD5 PSMD8 PSMC6 PSMB5 PSMD10 PSMD9 SKP1 NMI PSMB2 RNF111 PSMC2 PSMD6 PSMC3 OTUB1 THOP1 PSMD1 UBE2L3 PSMD12 PSMB3 PSMC4 PSME1
0.00403634529642827	24	368	2.21383816000611	Cellular response to external stimulus	http://amigo.geneontology.org/amigo/term/GO:0071496	GCLC CYBA CNN2 MAPK1 STK24 MTPN CAV1 LAMTOR3 NFKB1 DCPS ATP6V1A ATP6V1F EIF2S1 LAMTOR5 HNRNPA1 GLUL CASP1 IMPACT AIFM1 IFI16 DAG1 PTPN11 UPP1 LYN
0.00318713962985236	24	361	2.25676576975692	Positive regulation of establishment of protein localization	http://amigo.geneontology.org/amigo/term/GO:1904951	NADK IPO5 TSG101 MAPK1 NUTF2 PPP3CB PSMD9 PDCD10 CCT4 RAN MYH10 CCT7 GLUL PFKM CCT8 CCT3 PRKCD KIF5B PRNP HCLS1 UBE2L3 MYO1C RACK1 FIS1
0.00239889733332159	24	352	2.31446716727912	Cellular response to peptide hormone stimulus	http://amigo.geneontology.org/amigo/term/GO:0071375	GCLC CYBA ROCK1 CSK CAV1 PRKAR1A NFKB1 PRKAR2A GNAI2 ATP6V1A IDE ATP6V1F CSRP3 USO1 PRKCD FBN1 TRIM72 GRB2 PTPN11 MYO1C APRT LYN PKLR PRKACA
0.00223510345159794	24	350	2.32769269394928	Cellular response to abiotic stimulus	http://amigo.geneontology.org/amigo/term/GO:0071214	GCLC CYBA CNN2 XRCC5 DNM2 AKR1B1 MTPN NFKB1 CRYAB TMEM109 SERPINB6 EIF2S1 CASP1 ADIRF IMPACT IFI16 PRKCD DDB1 OXSR1 DAG1 GRB2 PTPN11 ADSS1 EEF1D
0.00223510345159794	24	350	2.32769269394928	Cellular response to environmental stimulus	http://amigo.geneontology.org/amigo/term/GO:0104004	GCLC CYBA CNN2 XRCC5 DNM2 AKR1B1 MTPN NFKB1 CRYAB TMEM109 SERPINB6 EIF2S1 CASP1 ADIRF IMPACT IFI16 PRKCD DDB1 OXSR1 DAG1 GRB2 PTPN11 ADSS1 EEF1D
0.00185723320629764	24	345	2.36142737067319	Protein-DNA complex assembly	http://amigo.geneontology.org/amigo/term/GO:0065004	PSMD5 PSMD8 PSMC6 PSMB5 PSMD10 PSMD9 CAND1 PSMB2 PSMC2 RBBP4 PSMD6 HMGB2 PSMC3 DDB1 PSMD1 H3C13 H1-10 NAP1L1 H1-0 HMGB1 PSMD12 PSMB3 PSMC4 PSME1
1.74476409947339e-06	24	214	3.80697403216004	NIK/NF-kappaB signaling	http://amigo.geneontology.org/amigo/term/GO:0038061	CUL1 RHOA IFI35 PSMD5 PSMD8 PSMC6 PSMB5 C20orf27 PSMD10 PSMD9 SKP1 NMI PSMB2 CHI3L1 RPS3 PSMC2 PSMD6 PSMC3 PSMD1 HMGB1 PSMD12 PSMB3 PSMC4 PSME1
2.15093070925431e-10	24	133	6.12550708934022	Fc-epsilon receptor signaling pathway	http://amigo.geneontology.org/amigo/term/GO:0038095	CUL1 PSMD5 PSMD8 MAPK1 PSMC6 PSMB5 PSMD10 PPP3CB NFKB1 PSMD9 SKP1 PSMB2 PSMC2 PSMD6 PSMC3 PSMD1 GRB2 PAK2 PSMD12 PLCG2 LYN PSMB3 PSMC4 PSME1
0.0810202494568074	23	475	1.64367773563963	Myeloid cell differentiation	http://amigo.geneontology.org/amigo/term/GO:0030099	PAFAH1B1 KAT8 NCKAP1L GLO1 RPS6 TMOD3 PML LBR IFI16 PF4 HMGB2 FBN1 FASN AHSP PTPN11 HCLS1 H3C13 EVI2B ISG15 HMGB1 NME1 LYN PRTN3
0.0731016825884328	23	469	1.66470559579706	Purine nucleotide metabolic process	http://amigo.geneontology.org/amigo/term/GO:0006163	RHOA DLD ATP5F1D ATP5F1B ATP6V1A ABHD14B PAICS RAN AMPD3 ATIC PFKL ATP5F1A PFKM ATP5MC3 BPNT1 NUDT2 HINT1 FASN ADSS1 APRT NME1 PKLR NUDT3
0.0556501079213509	23	453	1.72350314443449	Regulation of neuron projection development	http://amigo.geneontology.org/amigo/term/GO:0010975	PAFAH1B1 GRN RHOA ARHGAP4 DPYSL2 RANBP1 CRKL CTSZ STK24 EHD1 SNX3 RTN4 RAB17 SNAPIN TIAM2 KLK6 MAP2K1 PAK2 AP2A1 GDI1 NME1 LYN SCARF1
0.0518696090042117	23	448	1.74273867060005	Regulation of metal ion transport	http://amigo.geneontology.org/amigo/term/GO:0010959	CYBA RHOA KCNAB2 DNM2 FKBP1A CAV1 GNAI2 CASQ2 DIAPH1 PML CAMK2D EPB41 CALM3 S100A1 KIF5B PRNP IL16 OXSR1 ATP2A1 PLCG2 BPIFA1 LYN PRKACA
0.0429774718999117	23	439	1.77846679824333	Purine ribonucleotide metabolic process	http://amigo.geneontology.org/amigo/term/GO:0009150	RHOA DLD ATP5F1D ATP5F1B ATP6V1A ABHD14B PAICS RAN AMPD3 ATIC PFKL ATP5F1A PFKM ATP5MC3 BPNT1 NUDT2 HINT1 FASN ADSS1 APRT NME1 PKLR NUDT3
0.0385748999642116	23	434	1.79895604707102	Ameboidal-type cell migration	http://amigo.geneontology.org/amigo/term/GO:0001667	PAFAH1B1 DCN GRN RHOA ROCK1 ARHGAP4 PPM1F SH3BP1 ATP5F1B PDCD10 RTN4 AKAP12 GLUL PRCP PML ATP5F1A CORO1B PTPN11 HMGB1 PLCG2 PDCD6 ITGB3 GFUS
0.0198970545973326	23	403	1.9373372814611	RNA splicing, via transesterification reactions	http://amigo.geneontology.org/amigo/term/GO:0000375	SF3B2 HNRNPC HNRNPH3 SF3A1 SNRPD3 DDX17 DCPS SRSF3 SRSF4 SNRPB LSM8 RBM39 SRRM1 SYNCRIP HNRNPA1 DHX9 LUC7L2 HNRNPA3 SF3A3 SF3B3 LSM2 PPIL3 HNRNPH1
0.018519620319001	23	400	1.95186731107206	RNA splicing, via transesterification reactions with bulged adenosine as nucleophile	http://amigo.geneontology.org/amigo/term/GO:0000377	SF3B2 HNRNPC HNRNPH3 SF3A1 SNRPD3 DDX17 DCPS SRSF3 SRSF4 SNRPB LSM8 RBM39 SRRM1 SYNCRIP HNRNPA1 DHX9 LUC7L2 HNRNPA3 SF3A3 SF3B3 LSM2 PPIL3 HNRNPH1
0.018519620319001	23	400	1.95186731107206	MRNA splicing, via spliceosome	http://amigo.geneontology.org/amigo/term/GO:0000398	SF3B2 HNRNPC HNRNPH3 SF3A1 SNRPD3 DDX17 DCPS SRSF3 SRSF4 SNRPB LSM8 RBM39 SRRM1 SYNCRIP HNRNPA1 DHX9 LUC7L2 HNRNPA3 SF3A3 SF3B3 LSM2 PPIL3 HNRNPH1
0.00735118833173917	23	365	2.13903266966801	Negative regulation of organelle organization	http://amigo.geneontology.org/amigo/term/GO:0010639	GCLC WAS DNM2 HNRNPC MAPRE1 CHMP4B PSMD10 MTPN VAT1 PRKAR1A STMN1 EML2 SWAP70 HNRNPA1 RDX TMOD3 PML ADD3 PRKCD ACAA2 CORO1B PAK2 CHMP4A
0.00222775935949543	23	328	2.38032598911226	Protein deubiquitination	http://amigo.geneontology.org/amigo/term/GO:0016579	RHOA PSMD5 PSMD8 PSMC6 PSMB5 USP14 PSMD10 PSMD9 USP5 SNX3 UCHL3 PSMB2 PSMC2 PSMD6 PSMC3 OTUB1 PSMD1 EIF3F RAD23A PSMD12 PSMB3 PSMC4 PSME1
0.00100297581798602	23	307	2.54314959097336	Regulation of RNA stability	http://amigo.geneontology.org/amigo/term/GO:0043487	ROCK1 XPO1 HNRNPC PSMD5 PSMD8 PSMC6 PSMB5 PSMD10 DCPS PSMD9 PSMB2 SYNCRIP DHX9 PSMC2 PSMD6 PRKCD PSMC3 PSMD1 PSMD12 LSM2 PSMB3 PSMC4 PSME1
0.000676348782359067	23	298	2.61995612224437	Regulation of mRNA catabolic process	http://amigo.geneontology.org/amigo/term/GO:0061013	ROCK1 XPO1 HNRNPC PSMD5 PSMD8 PSMC6 PSMB5 PSMD10 DCPS PSMD9 PSMB2 SYNCRIP DHX9 PSMC2 PSMD6 PRKCD PSMC3 PSMD1 PSMD12 LSM2 PSMB3 PSMC4 PSME1
0.000581204221971716	23	294	2.6556017837715	Regulation of actin filament organization	http://amigo.geneontology.org/amigo/term/GO:0110053	WAS RHOA ROCK1 PPM1F SH3BP1 MTPN PLEK STMN1 NCKAP1L SWAP70 ARPC5L RDX TMOD3 ADD3 PRKCD CFL2 CORO1B GRB2 HCLS1 PAK2 CD47 MYO1C BRK1
0.000489646488508347	23	290	2.69223077389249	Regulation of mRNA stability	http://amigo.geneontology.org/amigo/term/GO:0043488	ROCK1 XPO1 HNRNPC PSMD5 PSMD8 PSMC6 PSMB5 PSMD10 DCPS PSMD9 PSMB2 SYNCRIP DHX9 PSMC2 PSMD6 PRKCD PSMC3 PSMD1 PSMD12 LSM2 PSMB3 PSMC4 PSME1
1.07634428048304e-08	23	148	5.2753170569515	Innate immune response-activating signal transduction	http://amigo.geneontology.org/amigo/term/GO:0002758	CUL1 PSMD5 PSMD8 PSMC6 PSMB5 PSMD10 NFKB1 PSMD9 SKP1 PSMB2 PSMC2 PSMD6 PRKCD PSMC3 PSMD1 PAK2 PSMD12 PLCG2 LYN PSMB3 PSMC4 PSME1 PRKACA
9.95724857070391e-09	23	147	5.31120356754301	Innate immune response activating cell surface receptor signaling pathway	http://amigo.geneontology.org/amigo/term/GO:0002220	CUL1 PSMD5 PSMD8 PSMC6 PSMB5 PSMD10 NFKB1 PSMD9 SKP1 PSMB2 PSMC2 PSMD6 PRKCD PSMC3 PSMD1 PAK2 PSMD12 PLCG2 LYN PSMB3 PSMC4 PSME1 PRKACA
3.23627106585171e-09	23	139	5.61688434840879	Response to lectin	http://amigo.geneontology.org/amigo/term/GO:1990840	CUL1 PSMD5 PSMD8 PSMC6 PSMB5 PSMD10 NFKB1 PSMD9 SKP1 PSMB2 PSMC2 PSMD6 PRKCD PSMC3 PSMD1 PAK2 PSMD12 PLCG2 LYN PSMB3 PSMC4 PSME1 PRKACA
3.23627106585171e-09	23	139	5.61688434840879	Cellular response to lectin	http://amigo.geneontology.org/amigo/term/GO:1990858	CUL1 PSMD5 PSMD8 PSMC6 PSMB5 PSMD10 NFKB1 PSMD9 SKP1 PSMB2 PSMC2 PSMD6 PRKCD PSMC3 PSMD1 PAK2 PSMD12 PLCG2 LYN PSMB3 PSMC4 PSME1 PRKACA
2.96108357646621e-09	23	138	5.65758640890451	Stimulatory C-type lectin receptor signaling pathway	http://amigo.geneontology.org/amigo/term/GO:0002223	CUL1 PSMD5 PSMD8 PSMC6 PSMB5 PSMD10 NFKB1 PSMD9 SKP1 PSMB2 PSMC2 PSMD6 PRKCD PSMC3 PSMD1 PAK2 PSMD12 PLCG2 LYN PSMB3 PSMC4 PSME1 PRKACA
0.0760753811684192	22	445	1.67820540668628	Leukocyte cell-cell adhesion	http://amigo.geneontology.org/amigo/term/GO:0007159	RHOA ROCK1 STK10 CSK CAV1 PRKAR1A NCKAP1L FGL2 IL6ST HSPD1 RPS3 VSIG4 ICOSLG PRNP OLR1 GRB2 PTPN11 PAK2 HMGB1 CD47 LYN GFUS
0.0299247008794464	22	397	1.88111185384231	Protein localization to extracellular region	http://amigo.geneontology.org/amigo/term/GO:0071692	PAFAH1B1 NADK LTBP1 ERP29 RAB3D PPP3CB PSMD9 PLEK LTBP2 MYH10 GLUL HADH PFKL PAM PFKM FBN1 KIF5B SNCG PTPN11 COPG1 IDH2 CANX
0.0294673609075338	22	396	1.8858621363015	Negative regulation of phosphorylation	http://amigo.geneontology.org/amigo/term/GO:0042326	MVP IPO5 ROCK1 TSG101 TMED2 RTRAF CRKL PPM1F CSK PPP2R1A CAV1 PRKAR1A PRKAR2A NIBAN1 IMPACT CALM3 PRKCD PRNP PAK2 RACK1 IPO7 LYN
0.0252833037099848	22	389	1.91979795880564	Response to metal ion	http://amigo.geneontology.org/amigo/term/GO:0010038	GCLC CPNE3 ATP5F1D RANBP1 MAPK1 PPP2CB CAV1 CASQ2 ALOX5AP EIF2S1 SORD CAMK2D PAM QDPR CALM3 PRNP PPP1CA S100A16 PLCG2 GDI1 CUTA PDCD6
0.0228133673563415	22	384	1.94479532806093	Nuclear transport	http://amigo.geneontology.org/amigo/term/GO:0051169	IPO5 XPO1 SNRPD3 MAPK1 NUTF2 CPSF6 SRSF3 SRSF4 UFM1 SNRPB RAN SRRM1 HNRNPA1 DHX9 SSB PML EIF4E PRKCD PTPN11 HCLS1 KPNA4 IPO7
0.0211779094559795	22	381	1.96010867710078	Nucleocytoplasmic transport	http://amigo.geneontology.org/amigo/term/GO:0006913	IPO5 XPO1 SNRPD3 MAPK1 NUTF2 CPSF6 SRSF3 SRSF4 UFM1 SNRPB RAN SRRM1 HNRNPA1 DHX9 SSB PML EIF4E PRKCD PTPN11 HCLS1 KPNA4 IPO7
0.010613692265848	22	355	2.10366593232506	Protein localization to cell periphery	http://amigo.geneontology.org/amigo/term/GO:1990778	EHD2 ROCK1 VPS35 FYB1 TMED2 CSK RAB3D CAV1 EHD1 GBP1 CSRP3 NUMA1 RDX EPB41 AP2M1 STX3 KIF5B PRNP DAG1 RHOG RACK1 NSF
0.00585768610590452	22	335	2.22925792828476	Regulation of protein stability	http://amigo.geneontology.org/amigo/term/GO:0031647	GRN CUL3 VPS35 MAPK1 STK3 CRYAB PTGES3 PDCD10 RTN4 CCT4 CCT7 PML HSPD1 CCT8 ASGR2 CCT3 PRKCD AHSP PRNP RAD23A DDI2 IFI30
0.00172786116910976	22	300	2.48933801991798	Positive regulation of protein-containing complex assembly	http://amigo.geneontology.org/amigo/term/GO:0031334	WAS RHOA PSMC6 MAPRE1 CAND1 PLEK NCKAP1L CLIP1 ARPC5L NUMA1 RPS3 ASAP1 PSMC2 PSMC3 DDB1 CORO1B GRB2 MYO1C RACK1 DCTN1 BRK1 PSMC4
0.000583439705606792	22	274	2.72555257655254	Spindle organization	http://amigo.geneontology.org/amigo/term/GO:0007051	PAFAH1B1 RHOA DYNC1I2 XPO1 CHMP5 NUDC RANBP1 SUN2 MAPRE1 CHMP4B SMC3 STMN1 PTPA CHMP2A CLIP1 RAN NUMA1 RPS3 DYNC1H1 DCTN1 CHMP1B RCC2
0.000299383373168321	22	260	2.87231309990537	Endosomal transport	http://amigo.geneontology.org/amigo/term/GO:0016197	VTA1 WAS EHD2 VPS35 TSG101 EPS15 CHMP5 CHMP4B EEA1 EHD1 VPS29 SNX3 RAB14 RAB17 EPS15L1 CHMP2A ARHGAP1 RAB6A DCTN1 SNX2 CHMP1B CHMP4A
1.39388819560755e-07	22	155	4.81807358693803	Antigen processing and presentation of peptide antigen via MHC class I	http://amigo.geneontology.org/amigo/term/GO:0002474	CYBA PSMD5 PSMD8 NCF4 PSMC6 PSMB5 PSMD10 PSMD9 NCF2 IDE PSMB2 PSMC2 PSMD6 ERAP1 PSMC3 PSMD1 PSMD12 IFI30 PSMB3 PSMC4 CANX PSME1
0.0452998614340485	21	391	1.82316083765209	Biological process involved in symbiotic interaction	http://amigo.geneontology.org/amigo/term/GO:0044403	PGLYRP1 TSG101 EPS15 MAPK1 CHMP4B VAPA CAV1 SNX3 IDE CHMP2A PML HSPD1 PF4 PSMC3 DDB1 SERPINB9 DAG1 GRB2 KPNA4 BPIFA1 ITGB3
0.029725900155535	21	372	1.91627926753217	Canonical Wnt signaling pathway	http://amigo.geneontology.org/amigo/term/GO:0060070	CUL3 PSMD5 PSMD8 PSMC6 PSMB5 PSMD10 STK3 CAV1 SFRP4 NFKB1 PSMD9 PSMB2 PSMC2 PSMD6 PSMC3 PPP1CA PSMD1 PSMD12 PSMB3 PSMC4 PSME1
0.0293980822383064	21	371	1.92144444076002	Protein dephosphorylation	http://amigo.geneontology.org/amigo/term/GO:0006470	ROCK1 FKBP1A PPM1F RPRD1B PPP2CB PPP6R1 PPP2R1A PPP3CB MINPP1 GNAI2 PPP1R7 PTPA NCKAP1L SWAP70 TIPRL CALM3 PRKCD UBLCP1 PPP1CA PTPN11 PGP
0.024758244050516	21	364	1.95839529539002	DNA replication	http://amigo.geneontology.org/amigo/term/GO:0006260	PSMD5 PSMD8 PSMC6 PSMB5 PSMD10 PPP2R1A SMC3 PSMD9 PSMB2 DHX9 PSMC2 RBBP4 PSMD6 PSMC3 PSMD1 NAP1L1 PSMD12 TOP1 PSMB3 PSMC4 PSME1
0.0232212729067974	21	361	1.97467004853731	Muscle contraction	http://amigo.geneontology.org/amigo/term/GO:0006936	HSPB6 RHOA ROCK1 TNNT1 CAV1 MYH3 CRYAB CASQ2 CSRP3 MYH8 DYSF TMOD3 CAMK2D CALM3 TCAP TRIM72 ATP2A1 MYH6 MYH4 MYH11 PRKACA
0.0189241851606575	21	353	2.01942177768263	Energy derivation by oxidation of organic compounds	http://amigo.geneontology.org/amigo/term/GO:0015980	RHOA DLD FH ATP5F1D ACO2 PYGB GYS1 ATP5F1B PTGES3 GBE1 IDE IL6ST ATP5F1A PFKM ATP5MC3 AGL UQCRFS1 PGM2 PPP1CA IDH2 HMGB1
0.0103951104635611	21	331	2.15364316471894	Response to endoplasmic reticulum stress	http://amigo.geneontology.org/amigo/term/GO:0034976	UBE2K TMED2 ERP29 PSMC6 USP14 PPP2CB CAV1 ERLIN1 UFM1 SSR1 EIF2S1 NIBAN1 PML TMCO1 HDGF AIFM1 ATP2A1 ERO1A RACK1 DCTN1 CANX
0.00872334695227269	21	325	2.19340273083683	Cellular response to oxidative stress	http://amigo.geneontology.org/amigo/term/GO:0034599	CYBA MAPK1 NCF4 STK24 PDCD10 LANCL1 NCF2 ADPRS EIF2S1 PML RPS3 IMPACT AIFM1 PRKCD NUDT2 CCS PTPN11 ERO1A TXNRD1 RACK1 MSRA
0.00795198482238693	21	322	2.21383816000611	Regulation of canonical Wnt signaling pathway	http://amigo.geneontology.org/amigo/term/GO:0060828	CUL3 PSMD5 PSMD8 PSMC6 PSMB5 PSMD10 STK3 CAV1 SFRP4 NFKB1 PSMD9 PSMB2 PSMC2 PSMD6 PSMC3 PPP1CA PSMD1 PSMD12 PSMB3 PSMC4 PSME1
0.00495377938047404	21	308	2.31446716727912	Cellular carbohydrate metabolic process	http://amigo.geneontology.org/amigo/term/GO:0044262	AKR1B1 PYGB GYS1 PTGES3 GBE1 PLEK FBP2 IL6ST SORD TKFC PFKM AGL BPNT1 DDB1 PGM2 GUSB PPP1CA IDH2 PGP HMGB1 RPE
0.00495377938047404	21	308	2.31446716727912	Intrinsic apoptotic signaling pathway	http://amigo.geneontology.org/amigo/term/GO:0097193	PLAUR CUL3 CUL1 UBE2K ERP29 PPM1F STK24 CAV1 TMEM109 PDCD10 PML RPS3 AIFM1 IFI16 PRKCD HINT1 ATP2A1 ERO1A RACK1 FIS1 MIF
0.0007680930701951	21	260	2.74175341354603	Regulation of protein polymerization	http://amigo.geneontology.org/amigo/term/GO:0032271	WAS RHOA MAPRE1 MTPN STMN1 NCKAP1L EML2 CLIP1 ARPC5L NUMA1 RDX TMOD3 ADD3 RPS3 PRKCD CORO1B GRB2 HCLS1 MYO1C DCTN1 BRK1
0.000603253055225031	21	255	2.79551328439988	Positive regulation of cytoskeleton organization	http://amigo.geneontology.org/amigo/term/GO:0051495	WAS RHOA PPM1F MAPRE1 PLEK NCKAP1L CLIP1 SWAP70 ARPC5L NUMA1 PFDN2 RPS3 CFL2 CORO1B GRB2 HCLS1 CD47 DYNC1H1 MYO1C DCTN1 BRK1
0.000504009390932585	21	251	2.84006329690027	Cellular response to oxygen levels	http://amigo.geneontology.org/amigo/term/GO:0071453	PSMD5 PSMD8 PSMC6 PSMB5 PSMD10 CAV1 PSMD9 ATP6V1A RTN4 PSMB2 AIFM1 PSMC2 PSMD6 PSMC3 ACAA2 PSMD1 PSMD12 ERO1A PSMB3 PSMC4 PSME1
0.000239440323489058	21	236	3.02057579458461	Vesicle localization	http://amigo.geneontology.org/amigo/term/GO:0051648	PAFAH1B1 CUL3 RAB27A DNM2 CD59 TMED2 DPYSL2 CTSZ PPP6R1 NAPA CTSC TFG RAB17 USO1 MYO1F SNAPIN KIF5B DYNC1H1 MYO1C PDCD6 NSF
0.000182441262129133	21	231	3.08595622303882	Microtubule cytoskeleton organization involved in mitosis	http://amigo.geneontology.org/amigo/term/GO:1902850	PAFAH1B1 RHOA DYNC1I2 XPO1 CHMP5 NSFL1C NUDC SUN2 MAPRE1 CHMP4B SMC3 STMN1 PTPA CHMP2A CLIP1 RAN NUMA1 DYNC1H1 DCTN1 CHMP1B RCC2
9.34519726276903e-05	21	220	3.24025403419077	Establishment of vesicle localization	http://amigo.geneontology.org/amigo/term/GO:0051650	PAFAH1B1 CUL3 RAB27A DNM2 CD59 TMED2 DPYSL2 CTSZ PPP6R1 NAPA CTSC TFG RAB17 USO1 MYO1F SNAPIN KIF5B DYNC1H1 MYO1C PDCD6 NSF
2.64936629812865e-05	21	202	3.52898954218796	Actomyosin structure organization	http://amigo.geneontology.org/amigo/term/GO:0031032	WAS CUL3 CNN2 RHOA ROCK1 PPM1F TNNT1 PRKAR1A MYH3 STMN1 CSRP3 MYH10 TMOD3 EPB41 CFL2 KRT8 TCAP PAK2 CD47 MYH6 MYH11
0.0719423398176386	20	390	1.74079581812446	Establishment of protein localization to extracellular region	http://amigo.geneontology.org/amigo/term/GO:0035592	PAFAH1B1 NADK ERP29 RAB3D PPP3CB PSMD9 PLEK LTBP2 MYH10 GLUL HADH PFKL PAM PFKM KIF5B SNCG PTPN11 COPG1 IDH2 CANX
0.0717898298628598	20	389	1.74527087164149	Protein secretion	http://amigo.geneontology.org/amigo/term/GO:0009306	PAFAH1B1 NADK ERP29 RAB3D PPP3CB PSMD9 PLEK LTBP2 MYH10 GLUL HADH PFKL PAM PFKM KIF5B SNCG PTPN11 COPG1 IDH2 CANX
0.0664658972078513	20	385	1.76340355602219	Negative regulation of proteolysis	http://amigo.geneontology.org/amigo/term/GO:0045861	PLAUR ROCK1 LXN CTSZ USP14 CRYAB IL1R2 IDE SERPINB6 SPINK5 LAMTOR5 PML IFI16 WFDC12 SERPINB9 PRNP PAK2 SERPINB13 SERPINB5 SERPINB10
0.0610030285808142	20	381	1.78191697918252	Regulation of apoptotic signaling pathway	http://amigo.geneontology.org/amigo/term/GO:2001233	GCLC PLAUR GCLM ERP29 PSMD10 STK3 CAV1 CTSC GNAI2 PML RPS3 PF4 PRKCD HMGB2 ACAA2 PPP1CA PAK2 RACK1 FIS1 MIF
0.0406263686989776	20	361	1.8806381414641	Protein-containing complex disassembly	http://amigo.geneontology.org/amigo/term/GO:0032984	VTA1 TSG101 CHMP5 SH3BP1 NAPA MTPN CAV1 PLEK STMN1 CHMP2A SWAP70 RDX TMOD3 SNAPIN ADD3 CFL2 KIF5B PPP1CA CHMP1B NSF
0.0372067782662825	20	357	1.90170971727883	Regulation of neuron death	http://amigo.geneontology.org/amigo/term/GO:1901214	GCLC GCLM GRN RHOA VPS35 CTSZ CHMP4B GBE1 LANCL1 NQO2 EIF2S1 HSPD1 AIFM1 PM20D1 CAPN2 PRNP SNCG RACK1 FIS1 CHMP4A
0.0372067782662825	20	357	1.90170971727883	Negative regulation of cell cycle phase transition	http://amigo.geneontology.org/amigo/term/GO:1901988	CUL1 PSMD5 PSMD8 PSMC6 PSMB5 PSMD10 PSMD9 SKP1 PSMB2 PML TIPRL PSMC2 PSMD6 PSMC3 PSMD1 PTPN11 PSMD12 PSMB3 PSMC4 PSME1
0.0330740808166834	20	352	1.92872263939927	Negative regulation of protein phosphorylation	http://amigo.geneontology.org/amigo/term/GO:0001933	MVP IPO5 TSG101 TMED2 RTRAF CRKL PPM1F PPP2R1A CAV1 PRKAR1A PRKAR2A NIBAN1 IMPACT CALM3 PRKCD PRNP PAK2 RACK1 IPO7 LYN
0.0288944779768083	20	346	1.96216869672989	ATP metabolic process	http://amigo.geneontology.org/amigo/term/GO:0046034	NADK RHOA DLD ATP5F1D MYH3 ATP5F1B ATP6V1A MYH8 OLA1 PFKL ATP5F1A PFKM ATP5MC3 NUDT2 NUDT5 UQCRFS1 MYH6 FIS1 PKLR MYH4
0.0273958576241348	20	344	1.97357665426902	Positive regulation of protein transport	http://amigo.geneontology.org/amigo/term/GO:0051222	NADK IPO5 TSG101 MAPK1 NUTF2 PPP3CB PSMD9 PDCD10 RAN MYH10 GLUL PFKM PRKCD KIF5B PRNP HCLS1 UBE2L3 MYO1C RACK1 FIS1
0.010829685567816	20	310	2.1900334486082	Protein localization to nucleus	http://amigo.geneontology.org/amigo/term/GO:0034504	IPO5 XPO1 MAPK1 SUN2 NUTF2 SKP1 CCT4 UFM1 RAN LAMTOR5 CCT7 GLUL PML CCT8 GBP2 CCT3 PRKCD HCLS1 KPNA4 IPO7
0.00573273256782462	20	290	2.34107023816738	Nucleoside phosphate biosynthetic process	http://amigo.geneontology.org/amigo/term/GO:1901293	NADK KARS1 DLD ATP5F1D MAPK1 ATP5F1B ATP6V1A PAICS AMPD3 ATIC ATP5F1A ATP5MC3 NUDT2 FASN NADSYN1 IDH2 UPP1 ADSS1 APRT NME1
0.00478345049512793	20	285	2.38214164585453	Nucleotide biosynthetic process	http://amigo.geneontology.org/amigo/term/GO:0009165	NADK KARS1 DLD ATP5F1D MAPK1 ATP5F1B ATP6V1A PAICS AMPD3 ATIC ATP5F1A ATP5MC3 NUDT2 FASN NADSYN1 IDH2 UPP1 ADSS1 APRT NME1
0.00060479467656425	20	236	2.87673885198534	Negative regulation of Wnt signaling pathway	http://amigo.geneontology.org/amigo/term/GO:0030178	CUL3 PSMD5 PSMD8 PSMC6 PSMB5 PSMD10 STK3 CAV1 SFRP4 PSMD9 PSMB2 PSMC2 PSMD6 PSMC3 PSMD1 PSMD12 RACK1 PSMB3 PSMC4 PSME1
0.00060479467656425	20	236	2.87673885198534	Positive regulation of intracellular transport	http://amigo.geneontology.org/amigo/term/GO:0032388	EHD2 IPO5 MAPK1 NUTF2 EHD1 CPSF6 PDCD10 RAN DHX9 NUMA1 RDX PRKCD KIF5B PRNP HCLS1 UBE2L3 ATP2A1 DYNC1H1 MYO1C FIS1
0.000460214752727697	20	230	2.95178421334148	Translational initiation	http://amigo.geneontology.org/amigo/term/GO:0006413	EIF4B RPS5 TMED2 EIF3B EIF3A RPS12 EIF2S1 RPL35 RPS6 DENR PML RPS8 RPS3 EIF4E IMPACT EIF4A1 PPP1CA EIF3F RPL10A EIF3CL
0.000275315480109448	20	220	3.08595622303882	Tumor necrosis factor-mediated signaling pathway	http://amigo.geneontology.org/amigo/term/GO:0033209	UBE2K PSMD5 PSMD8 PSMC6 PSMB5 PSMD10 PSMD9 PSMB2 TXNDC17 CASP1 PSMC2 PSMD6 PSMC3 KRT8 PSMD1 PSMD12 RACK1 PSMB3 PSMC4 PSME1
0.000167583500636145	20	211	3.21758468752863	Mitotic spindle organization	http://amigo.geneontology.org/amigo/term/GO:0007052	PAFAH1B1 RHOA DYNC1I2 XPO1 CHMP5 NUDC SUN2 MAPRE1 CHMP4B SMC3 STMN1 PTPA CHMP2A CLIP1 RAN NUMA1 DYNC1H1 DCTN1 CHMP1B RCC2
9.08814884508717e-06	20	172	3.94715330853803	Non-canonical Wnt signaling pathway	http://amigo.geneontology.org/amigo/term/GO:0035567	RHOA PSMD5 PSMD8 PSMC6 PSMB5 PSMD10 SFRP4 PPP3CB PSMD9 PSMB2 PSMC2 AP2M1 PSMD6 PSMC3 PSMD1 AP2A1 PSMD12 PSMB3 PSMC4 PSME1
8.40150218396066e-06	20	171	3.97023607642422	Morphogenesis of a polarized epithelium	http://amigo.geneontology.org/amigo/term/GO:0001738	PAFAH1B1 RHOA PSMD5 PSMD8 SH3BP1 PSMC6 PSMB5 PSMD10 PSMD9 PSMB2 PSMC2 AP2M1 PSMD6 PSMC3 PSMD1 AP2A1 PSMD12 PSMB3 PSMC4 PSME1
0.0806952088673921	19	370	1.74314824490571	Negative regulation of immune response	http://amigo.geneontology.org/amigo/term/GO:0050777	FGR PGLYRP1 GRN CD59 PPP3CB PRKAR1A PRKAR2A NMI FGL2 SPINK5 TKFC VSIG4 IFI16 SERPINB9 ISG15 PLCG2 FCGR3A LYN PRKACA
0.0685298257291575	19	361	1.7866062343909	Regulation of cytosolic calcium ion concentration	http://amigo.geneontology.org/amigo/term/GO:0051480	CYBA FKBP1A CAV1 CASQ2 DIAPH1 SWAP70 PML CAMK2D CALM3 FPR1 PRNP HMGB1 ERO1A PLCG2 TGM2 FIS1 LYN CALB2 PRKACA
0.0273567878701283	19	320	2.01551515817223	Tissue migration	http://amigo.geneontology.org/amigo/term/GO:0090130	DCN GRN RHOA ROCK1 PPM1F SH3BP1 ATP5F1B PDCD10 RTN4 GLUL PRCP ATP5F1A CORO1B PTPN11 HMGB1 PLCG2 PDCD6 ITGB3 GFUS
0.0233000753430327	19	314	2.05402818667234	Epithelium migration	http://amigo.geneontology.org/amigo/term/GO:0090132	DCN GRN RHOA ROCK1 PPM1F SH3BP1 ATP5F1B PDCD10 RTN4 GLUL PRCP ATP5F1A CORO1B PTPN11 HMGB1 PLCG2 PDCD6 ITGB3 GFUS
0.0219465923031651	19	311	2.07384196339265	Epithelial cell migration	http://amigo.geneontology.org/amigo/term/GO:0010631	DCN GRN RHOA ROCK1 PPM1F SH3BP1 ATP5F1B PDCD10 RTN4 GLUL PRCP ATP5F1A CORO1B PTPN11 HMGB1 PLCG2 PDCD6 ITGB3 GFUS
0.011025559748171	19	288	2.23946128685804	Regulation of cellular protein catabolic process	http://amigo.geneontology.org/amigo/term/GO:1903362	GCLC VPS35 UBE2K XPO1 PSMC6 USP14 PSMD10 CAV1 CTSC USP5 RDX PML PSMC2 PSMC3 RAD23A RACK1 PSMC4 PSME1 PRKACA
0.00946821744180913	19	283	2.27902774068945	Monosaccharide metabolic process	http://amigo.geneontology.org/amigo/term/GO:0005996	GCLC H6PD AKR1B1 MAN2B1 GOT2 FBP2 SORD MAN2C1 PFKL TKFC PFKM NUDT5 DDB1 PGM2 PPP1CA PGP HMGB1 RPE PKLR
0.00801606799633445	19	278	2.32001744825581	Viral gene expression	http://amigo.geneontology.org/amigo/term/GO:0019080	ST6GAL1 RPS5 GANAB UBE2I EIF3B EIF3A RPS12 MGAT1 DHX9 RPL35 RPS6 SSB DENR RPS8 RPS3 PSMC3 EIF3F RPL10A CANX
0.00185723320629764	19	240	2.68735354422964	RNA localization	http://amigo.geneontology.org/amigo/term/GO:0006403	MVP XPO1 RTRAF NUTF2 CPSF6 SRSF3 CCT4 SRSF4 RAN SRRM1 HNRNPA1 CCT7 DHX9 SSB EIF4E CCT8 CCT3 HNRNPA3 MYO1C
0.00177312442482618	19	239	2.69859770131847	Actin polymerization or depolymerization	http://amigo.geneontology.org/amigo/term/GO:0008154	WAS RHOA SH3BP1 MTPN PLEK NCKAP1L DIAPH1 SWAP70 ARPC5L RDX TMOD3 ADD3 PRKCD CFL2 CORO1B GRB2 HCLS1 MYO1C BRK1
0.00130687484943201	19	232	2.78002090782377	Cellular response to decreased oxygen levels	http://amigo.geneontology.org/amigo/term/GO:0036294	PSMD5 PSMD8 PSMC6 PSMB5 PSMD10 PSMD9 RTN4 PSMB2 AIFM1 PSMC2 PSMD6 PSMC3 ACAA2 PSMD1 PSMD12 ERO1A PSMB3 PSMC4 PSME1
0.000649195481281921	19	218	2.95855436061979	Endoplasmic reticulum to Golgi vesicle-mediated transport	http://amigo.geneontology.org/amigo/term/GO:0006888	CUL3 DYNC1I2 CD59 TMED2 CTSZ VAPA RAB2A PPP6R1 NAPA COPE CTSC TFG COPA USO1 COPG1 DYNC1H1 DCTN1 PDCD6 NSF
0.000326459939414046	19	205	3.14617000300056	Regulation of cellular ketone metabolic process	http://amigo.geneontology.org/amigo/term/GO:0010565	H6PD PSMD5 PSMD8 PSMC6 PSMB5 PSMD10 CAV1 ERLIN1 PSMD9 PSMB2 PSMC2 PSMD6 PSMC3 PSMD1 PSMD12 CES1 PSMB3 PSMC4 PSME1
0.000326459939414046	19	205	3.14617000300056	Negative regulation of canonical Wnt signaling pathway	http://amigo.geneontology.org/amigo/term/GO:0090090	CUL3 PSMD5 PSMD8 PSMC6 PSMB5 PSMD10 STK3 CAV1 SFRP4 PSMD9 PSMB2 PSMC2 PSMD6 PSMC3 PSMD1 PSMD12 PSMB3 PSMC4 PSME1
5.18746067207492e-06	19	149	4.3286231584907	Establishment of planar polarity	http://amigo.geneontology.org/amigo/term/GO:0001736	PAFAH1B1 RHOA PSMD5 PSMD8 PSMC6 PSMB5 PSMD10 PSMD9 PSMB2 PSMC2 AP2M1 PSMD6 PSMC3 PSMD1 AP2A1 PSMD12 PSMB3 PSMC4 PSME1
5.18746067207492e-06	19	149	4.3286231584907	Establishment of tissue polarity	http://amigo.geneontology.org/amigo/term/GO:0007164	PAFAH1B1 RHOA PSMD5 PSMD8 PSMC6 PSMB5 PSMD10 PSMD9 PSMB2 PSMC2 AP2M1 PSMD6 PSMC3 PSMD1 AP2A1 PSMD12 PSMB3 PSMC4 PSME1
1.46509085108322e-06	19	135	4.77751741196381	Antigen processing and presentation of exogenous peptide antigen via MHC class I	http://amigo.geneontology.org/amigo/term/GO:0042590	CYBA PSMD5 PSMD8 NCF4 PSMC6 PSMB5 PSMD10 PSMD9 NCF2 PSMB2 PSMC2 PSMD6 PSMC3 PSMD1 PSMD12 IFI30 PSMB3 PSMC4 PSME1
2.31532704057799e-07	19	119	5.41987269424466	Interleukin-1-mediated signaling pathway	http://amigo.geneontology.org/amigo/term/GO:0070498	CUL1 PSMD5 PSMD8 PSMC6 PSMB5 PSMD10 NFKB1 PSMD9 SKP1 IL1R2 PSMB2 PSMC2 PSMD6 PSMC3 PSMD1 PSMD12 PSMB3 PSMC4 PSME1
0.0766589078546596	18	342	1.7866062343909	Negative regulation of mitotic cell cycle	http://amigo.geneontology.org/amigo/term/GO:0045930	CUL1 PSMD5 PSMD8 PSMC6 PSMB5 PSMD10 PSMD9 SKP1 PSMB2 PML PSMC2 PSMD6 PSMC3 PSMD1 PSMD12 PSMB3 PSMC4 PSME1
0.0550670250389803	18	325	1.88005948357442	Positive regulation of cytosolic calcium ion concentration	http://amigo.geneontology.org/amigo/term/GO:0007204	CYBA FKBP1A CAV1 CASQ2 DIAPH1 SWAP70 PML CAMK2D CALM3 FPR1 PRNP HMGB1 ERO1A PLCG2 TGM2 FIS1 LYN PRKACA
0.0314217368755218	18	302	2.02324282172744	Protein localization to plasma membrane	http://amigo.geneontology.org/amigo/term/GO:0072659	EHD2 ROCK1 VPS35 FYB1 TMED2 CSK RAB3D EHD1 GBP1 CSRP3 RDX AP2M1 STX3 KIF5B PRNP RHOG RACK1 NSF
0.0306142734255152	18	301	2.0299645586767	Response to insulin	http://amigo.geneontology.org/amigo/term/GO:0032868	GCLC GNAI2 ATP6V1A SRSF4 IDE GOT2 ATP6V1F CSRP3 USO1 HADH PRKCD TRIM72 GRB2 PTPN11 MYO1C APRT LYN PKLR
0.0214736484402548	18	287	2.12898722007557	Stem cell differentiation	http://amigo.geneontology.org/amigo/term/GO:0048863	XRCC5 PSMD5 PSMD8 MAPK1 PSMC6 PSMB5 PSMD10 PSMD9 PSMB2 PSMC2 PSMD6 PSMC3 PSMD1 PSMD12 PDCD6 PSMB3 PSMC4 PSME1
0.0167706964593737	18	279	2.1900334486082	Regulation of calcium ion transport	http://amigo.geneontology.org/amigo/term/GO:0051924	CYBA RHOA FKBP1A CAV1 GNAI2 CASQ2 DIAPH1 PML CAMK2D EPB41 CALM3 S100A1 PRNP IL16 ATP2A1 PLCG2 LYN PRKACA
0.013523367465738	18	272	2.24639460353561	Negative regulation of mitotic cell cycle phase transition	http://amigo.geneontology.org/amigo/term/GO:1901991	CUL1 PSMD5 PSMD8 PSMC6 PSMB5 PSMD10 PSMD9 SKP1 PSMB2 PML PSMC2 PSMD6 PSMC3 PSMD1 PSMD12 PSMB3 PSMC4 PSME1
0.0118673146083017	18	268	2.27992288120033	Regulation of cysteine-type endopeptidase activity	http://amigo.geneontology.org/amigo/term/GO:2000116	PLAUR RHOA PPM1F CRYAB HSPE1 LAMTOR5 CASP1 PML HSPD1 RPS3 AIFM1 IFI16 SERPINB9 PAK2 HMGB1 RACK1 FIS1 PDCD6
0.00454699502638589	18	241	2.5353499259821	Protein targeting to membrane	http://amigo.geneontology.org/amigo/term/GO:0006612	RPS5 CHMP4B RPS12 SSR1 RPL35 RPS6 RPS8 SRP9 ATG3 RPS3 PRNP NACA MYO1C GET3 RPL10A GDI1 FIS1 CHMP4A
0.00391396063059413	18	237	2.57814064203244	Positive regulation of supramolecular fiber organization	http://amigo.geneontology.org/amigo/term/GO:1902905	WAS RHOA PPM1F MAPRE1 PLEK NCKAP1L CLIP1 SWAP70 ARPC5L NUMA1 RPS3 CFL2 CORO1B GRB2 CD47 MYO1C DCTN1 BRK1
0.00373681519308415	18	236	2.58906496678681	Ribonucleoprotein complex subunit organization	http://amigo.geneontology.org/amigo/term/GO:0071826	EIF4B XRCC5 RPS5 SF3A1 SNRPD3 EIF3B EIF3A PTGES3 CPSF6 SNRPB DHX9 DENR LUC7L2 KIF5B EIF3F SF3A3 EIF3CL LSM2
0.00204381064822242	18	222	2.75233933406165	Cellular response to hypoxia	http://amigo.geneontology.org/amigo/term/GO:0071456	PSMD5 PSMD8 PSMC6 PSMB5 PSMD10 PSMD9 RTN4 PSMB2 PSMC2 PSMD6 PSMC3 ACAA2 PSMD1 PSMD12 ERO1A PSMB3 PSMC4 PSME1
0.00121929599744352	18	211	2.89582621877577	Carbohydrate derivative catabolic process	http://amigo.geneontology.org/amigo/term/GO:1901136	PGLYRP1 DCN NAGLU MANBA GNPDA1 MGAT1 CHI3L1 CHIT1 AMPD3 GNS PRKCD PGM2 HINT1 GUSB BGN UPP1 PRELP NUDT3
0.00121929599744352	18	211	2.89582621877577	Regulation of animal organ morphogenesis	http://amigo.geneontology.org/amigo/term/GO:2000027	RHOA PSMD5 PSMD8 PSMC6 PSMB5 PSMD10 PSMD9 PSMB2 PSMC2 AP2M1 PSMD6 PSMC3 PSMD1 AP2A1 PSMD12 PSMB3 PSMC4 PSME1
0.00100297581798602	18	207	2.95178421334148	Positive regulation of Wnt signaling pathway	http://amigo.geneontology.org/amigo/term/GO:0030177	PSMD5 PSMD8 PSMC6 PSMB5 PSMD10 CAV1 SFRP4 NFKB1 PSMD9 PSMB2 PSMC2 PSMD6 PSMC3 PSMD1 PSMD12 PSMB3 PSMC4 PSME1
0.000860584747291431	18	204	2.99519280471415	Regulation of actin filament length	http://amigo.geneontology.org/amigo/term/GO:0030832	WAS RHOA SH3BP1 MTPN PLEK NCKAP1L SWAP70 ARPC5L RDX TMOD3 ADD3 PRKCD CFL2 CORO1B GRB2 HCLS1 MYO1C BRK1
0.000813023648801033	18	203	3.00994744907235	Regulation of actin polymerization or depolymerization	http://amigo.geneontology.org/amigo/term/GO:0008064	WAS RHOA SH3BP1 MTPN PLEK NCKAP1L SWAP70 ARPC5L RDX TMOD3 ADD3 PRKCD CFL2 CORO1B GRB2 HCLS1 MYO1C BRK1
0.000527307589187904	18	195	3.13343247262404	Hematopoietic progenitor cell differentiation	http://amigo.geneontology.org/amigo/term/GO:0002244	XRCC5 PSMD5 PSMD8 PSMC6 PSMB5 PSMD10 PSMD9 PLEK PSMB2 PSMC2 PSMD6 PSMC3 KRT75 PSMD1 PSMD12 PSMB3 PSMC4 PSME1
0.000443759641476541	18	192	3.18239235500879	Nucleus organization	http://amigo.geneontology.org/amigo/term/GO:0006997	PAFAH1B1 CHMP5 NSFL1C SUN2 CHMP4B UBE2I PPP2R1A RTN4 CHMP2A RAN NUMA1 PML LBR HMGB2 H3C13 DCTN1 CHMP1B CHMP4A
0.000421420714566462	18	191	3.19905409508737	Amine metabolic process	http://amigo.geneontology.org/amigo/term/GO:0009308	AKR1B1 PSMD5 PSMD8 PSMC6 PSMB5 PSMD10 SMS MTPN PSMD9 PSMB2 PSMC2 PSMD6 PSMC3 PSMD1 PSMD12 PSMB3 PSMC4 PSME1
0.000311176532626903	18	186	3.2850501729123	Cellular amine metabolic process	http://amigo.geneontology.org/amigo/term/GO:0044106	AKR1B1 PSMD5 PSMD8 PSMC6 PSMB5 PSMD10 SMS MTPN PSMD9 PSMB2 PSMC2 PSMD6 PSMC3 PSMD1 PSMD12 PSMB3 PSMC4 PSME1
0.000247433711065142	18	182	3.35724907781147	Positive regulation of binding	http://amigo.geneontology.org/amigo/term/GO:0051099	PLAUR FKBP1A MAPRE1 STK3 PPP2CB CAV1 STMN1 IDE RAN EIF2S1 LAMTOR5 DHX9 EPB41 CALM3 HMGB2 H1-0 HMGB1 NME1
0.000147886659267177	18	174	3.51160535725108	Positive regulation of canonical Wnt signaling pathway	http://amigo.geneontology.org/amigo/term/GO:0090263	PSMD5 PSMD8 PSMC6 PSMB5 PSMD10 CAV1 SFRP4 NFKB1 PSMD9 PSMB2 PSMC2 PSMD6 PSMC3 PSMD1 PSMD12 PSMB3 PSMC4 PSME1
4.73410299203402e-06	18	133	4.59413031700517	Regulation of establishment of planar polarity	http://amigo.geneontology.org/amigo/term/GO:0090175	RHOA PSMD5 PSMD8 PSMC6 PSMB5 PSMD10 PSMD9 PSMB2 PSMC2 AP2M1 PSMD6 PSMC3 PSMD1 AP2A1 PSMD12 PSMB3 PSMC4 PSME1
3.62177068766647e-06	18	130	4.70014870893606	Antigen processing and presentation of exogenous peptide antigen via MHC class I, TAP-dependent	http://amigo.geneontology.org/amigo/term/GO:0002479	CYBA PSMD5 PSMD8 NCF4 PSMC6 PSMB5 PSMD10 PSMD9 NCF2 PSMB2 PSMC2 PSMD6 PSMC3 PSMD1 PSMD12 PSMB3 PSMC4 PSME1
3.32997148587499e-06	18	129	4.73658397024564	Wnt signaling pathway, planar cell polarity pathway	http://amigo.geneontology.org/amigo/term/GO:0060071	RHOA PSMD5 PSMD8 PSMC6 PSMB5 PSMD10 PSMD9 PSMB2 PSMC2 AP2M1 PSMD6 PSMC3 PSMD1 AP2A1 PSMD12 PSMB3 PSMC4 PSME1
5.49588184568625e-07	18	113	5.40725072709458	Vesicle budding from membrane	http://amigo.geneontology.org/amigo/term/GO:0006900	CUL3 DNM2 CD59 CHMP5 TMED2 CTSZ CHMP4B VAPA PPP6R1 NAPA CTSC SNX3 TFG USO1 AP2M1 PDCD6 NSF CHMP4A
0.0551209843715282	17	301	1.91718874986133	Protein-containing complex localization	http://amigo.geneontology.org/amigo/term/GO:0031503	VPS35 DNM2 XPO1 EPS15 SRSF3 SRSF4 RAN SRRM1 SSB SNAPIN EIF4E AP2M1 STX3 KIF5B DAG1 ITGB3 RCC2
0.0498102368413458	17	296	1.94957369496034	Biological process involved in interaction with host	http://amigo.geneontology.org/amigo/term/GO:0051701	PGLYRP1 TSG101 EPS15 MAPK1 CHMP4B VAPA CAV1 SNX3 IDE CHMP2A PML DDB1 SERPINB9 DAG1 GRB2 KPNA4 ITGB3
0.0235237662857199	17	268	2.15326049891142	Stress-activated protein kinase signaling cascade	http://amigo.geneontology.org/amigo/term/GO:0031098	PAFAH1B1 CUL1 RHOA AKR1B1 CRKL MAPK1 STK3 NFKB1 CRYAB SKP1 PDCD10 MAPK8IP3 MAP2K1 GPS1 PAK2 HMGB1 LYN
0.0228133673563415	17	266	2.16945042747466	Regulation of microtubule-based process	http://amigo.geneontology.org/amigo/term/GO:0032886	PAFAH1B1 RHOA ROCK1 XPO1 CHMP5 MAPRE1 CHMP4B STMN1 EML2 CHMP2A CLIP1 DIAPH1 NUMA1 RPS3 DYNC1H1 DCTN1 CHMP1B
0.0156455493769514	17	254	2.27194414845772	Regulation of proteolysis involved in cellular protein catabolic process	http://amigo.geneontology.org/amigo/term/GO:1903050	GCLC UBE2K XPO1 PSMC6 USP14 PSMD10 CAV1 CTSC USP5 PML PSMC2 PSMC3 RAD23A RACK1 PSMC4 PSME1 PRKACA
0.00808085881009245	17	235	2.45563324982238	Regulation of cysteine-type endopeptidase activity involved in apoptotic process	http://amigo.geneontology.org/amigo/term/GO:0043281	PLAUR RHOA PPM1F CRYAB HSPE1 LAMTOR5 CASP1 PML HSPD1 RPS3 AIFM1 SERPINB9 PAK2 HMGB1 RACK1 FIS1 PDCD6
0.00648738156156622	17	229	2.51997298562559	Ribonucleoprotein complex assembly	http://amigo.geneontology.org/amigo/term/GO:0022618	EIF4B XRCC5 RPS5 SF3A1 SNRPD3 EIF3B EIF3A PTGES3 CPSF6 SNRPB DHX9 DENR LUC7L2 EIF3F SF3A3 EIF3CL LSM2
0.00589714424648666	17	227	2.54217539078529	Maintenance of location in cell	http://amigo.geneontology.org/amigo/term/GO:0051651	PAFAH1B1 CYBA FKBP1A SUN2 CAV1 SKP1 CASQ2 SRGN DIAPH1 PML CAMK2D CALM3 ATP2A1 ERO1A PLCG2 LYN PRKACA
0.00548352405575593	17	225	2.56477250537004	Positive regulation of peptidase activity	http://amigo.geneontology.org/amigo/term/GO:0010952	GRN RHOA PPM1F CAV1 HSPE1 CASP1 PML HSPD1 RPS3 AIFM1 IFI16 HMGB1 RACK1 FIS1 PDCD6 LYN PSME1
0.00431477178615321	17	219	2.6350402452432	Carbohydrate catabolic process	http://amigo.geneontology.org/amigo/term/GO:0016052	PYGB MAN2B1 MANBA CHIT1 SORD MAN2C1 PFKL TKFC PFKM AGL NUDT5 PGM2 GUSB PPP1CA HMGB1 RPE PKLR
0.00159800427874428	17	197	2.9293086990267	Membrane docking	http://amigo.geneontology.org/amigo/term/GO:0022406	PAFAH1B1 ROCK1 STXBP2 DYNC1I2 MAPRE1 RAB3D PPP2R1A SNX3 PLEK USO1 STX3 TUBB4B DYNC1H1 DCTN1 TUBB NSF PRKACA
8.09533913043723e-06	17	125	4.61659050966608	Negative regulation of cell cycle G2/M phase transition	http://amigo.geneontology.org/amigo/term/GO:1902750	CUL1 PSMD5 PSMD8 PSMC6 PSMB5 PSMD10 PSMD9 SKP1 PSMB2 PSMC2 PSMD6 PSMC3 PSMD1 PSMD12 PSMB3 PSMC4 PSME1
6.86114400659948e-06	17	123	4.69165702201837	Negative regulation of G2/M transition of mitotic cell cycle	http://amigo.geneontology.org/amigo/term/GO:0010972	CUL1 PSMD5 PSMD8 PSMC6 PSMB5 PSMD10 PSMD9 SKP1 PSMB2 PSMC2 PSMD6 PSMC3 PSMD1 PSMD12 PSMB3 PSMC4 PSME1
2.9683075745544e-06	17	114	5.06205099744088	SCF-dependent proteasomal ubiquitin-dependent protein catabolic process	http://amigo.geneontology.org/amigo/term/GO:0031146	CUL1 PSMD5 PSMD8 PSMC6 PSMB5 PSMD10 PSMD9 SKP1 PSMB2 PSMC2 PSMD6 PSMC3 PSMD1 PSMD12 PSMB3 PSMC4 PSME1
0.080859123079234	16	294	1.847375153928	Cellular response to extracellular stimulus	http://amigo.geneontology.org/amigo/term/GO:0031668	MAPK1 STK24 CAV1 LAMTOR3 DCPS ATP6V1A ATP6V1F EIF2S1 LAMTOR5 HNRNPA1 GLUL IMPACT AIFM1 IFI16 UPP1 LYN
0.0605112632986376	16	281	1.93284090838019	Negative regulation of peptidase activity	http://amigo.geneontology.org/amigo/term/GO:0010466	PLAUR ROCK1 LXN USP14 CRYAB SERPINB6 SPINK5 LAMTOR5 IFI16 WFDC12 SERPINB9 PRNP PAK2 SERPINB13 SERPINB5 SERPINB10
0.0526076694804715	16	274	1.98222005567457	Striated muscle cell differentiation	http://amigo.geneontology.org/amigo/term/GO:0051146	EHD2 TNNT1 MTPN PRKAR1A MYH3 EHD1 CSRP3 TMOD3 CAPN2 CFL2 KRT8 TCAP TRIM72 NACA MYH6 MYH11
0.0512734575453175	16	273	1.98948093499939	Negative regulation of endopeptidase activity	http://amigo.geneontology.org/amigo/term/GO:0010951	PLAUR ROCK1 LXN USP14 CRYAB SERPINB6 SPINK5 LAMTOR5 IFI16 WFDC12 SERPINB9 PRNP PAK2 SERPINB13 SERPINB5 SERPINB10
0.0433695195979805	16	267	2.03418837174095	Regulation of intracellular protein transport	http://amigo.geneontology.org/amigo/term/GO:0033157	IPO5 XPO1 MAPK1 NUTF2 PDCD10 UFM1 RAN PRKCD KIF5B PRNP PTPN11 HCLS1 UBE2L3 MYO1C GDI1 FIS1
0.0433695195979805	16	267	2.03418837174095	Positive regulation of protein catabolic process	http://amigo.geneontology.org/amigo/term/GO:0045732	GCLC VPS35 PSMC6 PSMD10 CAV1 CTSC USP5 IDE RDX PSMC2 PSMC3 DDB1 RAD23A RACK1 NSF PSMC4
0.0379867542684181	16	262	2.07300876051463	Nucleobase-containing compound transport	http://amigo.geneontology.org/amigo/term/GO:0015931	MVP XPO1 RTRAF NUTF2 CPSF6 SRSF3 SRSF4 RAN SRRM1 HNRNPA1 DHX9 SSB EIF4E HNRNPA3 CD47 MYO1C
0.0351824658730559	16	259	2.09702044499936	Hexose metabolic process	http://amigo.geneontology.org/amigo/term/GO:0019318	H6PD AKR1B1 MAN2B1 GOT2 FBP2 SORD MAN2C1 PFKL TKFC PFKM DDB1 PGM2 PPP1CA PGP HMGB1 PKLR
0.0225245823199963	16	243	2.23509586524623	Regulation of epithelial cell migration	http://amigo.geneontology.org/amigo/term/GO:0010632	DCN GRN RHOA PPM1F SH3BP1 ATP5F1B PDCD10 RTN4 GLUL PRCP ATP5F1A HMGB1 PLCG2 PDCD6 ITGB3 GFUS
0.00490781266322579	16	202	2.68875393690511	Regulation of protein binding	http://amigo.geneontology.org/amigo/term/GO:0043393	ROCK1 FKBP1A CTSZ MAPRE1 STK3 PPP2CB CAV1 IDE IFIT2 RAN SNAPIN EPB41 PRKCD PPP1CA RACK1 PRKACA
0.00101681671814026	16	170	3.19487232502843	Negative regulation of supramolecular fiber organization	http://amigo.geneontology.org/amigo/term/GO:1902904	WAS PFDN4 MAPRE1 MTPN CRYAB STMN1 EML2 SWAP70 RDX TMOD3 PFDN2 ADD3 VBP1 PRKCD CORO1B PAK2
0.000224969445843893	16	146	3.72005681681392	Regulation of DNA-templated transcription in response to stress	http://amigo.geneontology.org/amigo/term/GO:0043620	PSMD5 PSMD8 PSMC6 PSMB5 PSMD10 PSMD9 PSMB2 IMPACT PSMC2 PSMD6 PSMC3 PSMD1 PSMD12 PSMB3 PSMC4 PSME1
0.000131836609600212	16	139	3.90739780758873	Regulation of transcription from RNA polymerase II promoter in response to stress	http://amigo.geneontology.org/amigo/term/GO:0043618	PSMD5 PSMD8 PSMC6 PSMB5 PSMD10 PSMD9 PSMB2 IMPACT PSMC2 PSMD6 PSMC3 PSMD1 PSMD12 PSMB3 PSMC4 PSME1
1.27037044693195e-05	16	115	4.72285474134637	Regulation of phagocytosis	http://amigo.geneontology.org/amigo/term/GO:0050764	FGR CYBA CNN2 RAB27A DNM2 CSK SNX3 NCKAP1L DOCK2 DYSF ATG3 HMGB1 CD47 TGM2 RACK1 PRTN3
5.549196536236e-06	16	107	5.07596537621339	Hematopoietic stem cell differentiation	http://amigo.geneontology.org/amigo/term/GO:0060218	XRCC5 PSMD5 PSMD8 PSMC6 PSMB5 PSMD10 PSMD9 PSMB2 PSMC2 PSMD6 PSMC3 PSMD1 PSMD12 PSMB3 PSMC4 PSME1
4.73410299203402e-06	16	105	5.17265043099841	Anaphase-promoting complex-dependent catabolic process	http://amigo.geneontology.org/amigo/term/GO:0031145	CUL3 PSMD5 PSMD8 PSMC6 PSMB5 PSMD10 PSMD9 PSMB2 PSMC2 PSMD6 PSMC3 PSMD1 PSMD12 PSMB3 PSMC4 PSME1
0.0717898298628598	15	264	1.92872263939927	Cellular response to nutrient levels	http://amigo.geneontology.org/amigo/term/GO:0031669	MAPK1 STK24 CAV1 LAMTOR3 DCPS ATP6V1A ATP6V1F EIF2S1 LAMTOR5 HNRNPA1 GLUL IMPACT AIFM1 IFI16 UPP1
0.0674476894138438	15	261	1.95089186513949	Regulation of protein modification by small protein conjugation or removal	http://amigo.geneontology.org/amigo/term/GO:1903320	GCLC CUL3 FKBP1A PSMD10 UBE2I CAV1 SKP1 NMI UBA2 RPS3 RNF111 OTUB1 UBE2L3 ISG15 PDCD6
0.0660662517801409	15	260	1.95839529539002	Carbohydrate homeostasis	http://amigo.geneontology.org/amigo/term/GO:0033500	GCLC NADK GCLM CYBA PPP3CB CSRP3 RPS6 PRCP PFKM KIF5B PTPN11 RACK1 FIS1 NME1 PRKACA
0.0642077925384859	15	259	1.9659566671869	Glucose homeostasis	http://amigo.geneontology.org/amigo/term/GO:0042593	GCLC NADK GCLM CYBA PPP3CB CSRP3 RPS6 PRCP PFKM KIF5B PTPN11 RACK1 FIS1 NME1 PRKACA
0.0495787945941177	15	248	2.05315635807019	Protein autophosphorylation	http://amigo.geneontology.org/amigo/term/GO:0046777	FGR MVP SLK STK10 STK24 CSK CAV1 EIF2S1 CAMK2D IMPACT CALM3 OXSR1 MOB1B PAK2 LYN
0.0352438551463879	15	236	2.15755413898901	Reactive oxygen species metabolic process	http://amigo.geneontology.org/amigo/term/GO:0072593	CYBA RHOA RAB27A NCF4 CRYAB GNAI2 NCF2 NQO2 PRCP HSPD1 CBR1 PRKCD CCS GRB2 HBG2
0.0342730087973541	15	235	2.16673522043151	DNA-dependent DNA replication	http://amigo.geneontology.org/amigo/term/GO:0006261	PSMD5 PSMD8 PSMC6 PSMB5 PSMD10 PSMD9 PSMB2 PSMC2 PSMD6 PSMC3 PSMD1 PSMD12 PSMB3 PSMC4 PSME1
0.0301596884101516	15	231	2.20425444502773	Carbohydrate biosynthetic process	http://amigo.geneontology.org/amigo/term/GO:0016051	AKR1B1 GYS1 NFKB1 PTGES3 GBE1 PLEK GOT2 FBP2 SORD AGL DDB1 PGM2 PPP1CA PGP AP2A1
0.0288466680119221	15	229	2.22350557555199	Purine-containing compound biosynthetic process	http://amigo.geneontology.org/amigo/term/GO:0072522	DLD ATP5F1D MTAP ATP5F1B ATP6V1A PAICS AMPD3 ATIC ATP5F1A ATP5MC3 NUDT2 FASN ADSS1 APRT NME1
0.0253376249543074	15	225	2.2630345635618	Protein stabilization	http://amigo.geneontology.org/amigo/term/GO:0050821	GRN STK3 CRYAB PTGES3 PDCD10 RTN4 CCT4 CCT7 PML HSPD1 CCT8 CCT3 PRKCD AHSP IFI30
0.0196356951796311	15	217	2.34646440922307	Response to reactive oxygen species	http://amigo.geneontology.org/amigo/term/GO:0000302	MAPK1 STK24 PPP2CB CRYAB PDCD10 ADPRS HSPD1 RPS3 IMPACT AIFM1 CAPN2 PRKCD CCS PTPN11 RACK1
0.0196356951796311	15	217	2.34646440922307	Regulation of proteasomal protein catabolic process	http://amigo.geneontology.org/amigo/term/GO:0061136	GCLC UBE2K XPO1 PSMC6 USP14 PSMD10 CAV1 USP5 PSMC2 PSMC3 RAD23A RACK1 PSMC4 PSME1 PRKACA
0.0177780785559166	15	214	2.37935877010003	Ribose phosphate biosynthetic process	http://amigo.geneontology.org/amigo/term/GO:0046390	DLD ATP5F1D ATP5F1B ATP6V1A PAICS AMPD3 ATIC ATP5F1A ATP5MC3 NUDT2 FASN UPP1 ADSS1 APRT NME1
0.0165922379502202	15	212	2.40180555095003	Actin filament polymerization	http://amigo.geneontology.org/amigo/term/GO:0030041	WAS RHOA MTPN NCKAP1L DIAPH1 ARPC5L RDX TMOD3 ADD3 PRKCD CORO1B GRB2 HCLS1 MYO1C BRK1
0.0133412580181324	15	206	2.47176105243401	Ribonucleotide biosynthetic process	http://amigo.geneontology.org/amigo/term/GO:0009260	DLD ATP5F1D ATP5F1B ATP6V1A PAICS AMPD3 ATIC ATP5F1A ATP5MC3 NUDT2 FASN UPP1 ADSS1 APRT NME1
0.0133412580181324	15	206	2.47176105243401	Positive regulation of endopeptidase activity	http://amigo.geneontology.org/amigo/term/GO:0010950	RHOA PPM1F HSPE1 CASP1 PML HSPD1 RPS3 AIFM1 IFI16 HMGB1 RACK1 FIS1 PDCD6 LYN PSME1
0.0105689836598157	15	200	2.54591388400703	Establishment of RNA localization	http://amigo.geneontology.org/amigo/term/GO:0051236	MVP XPO1 RTRAF NUTF2 CPSF6 SRSF3 SRSF4 RAN SRRM1 HNRNPA1 DHX9 SSB EIF4E HNRNPA3 MYO1C
0.00944365253525605	15	197	2.58468414620003	Nucleic acid transport	http://amigo.geneontology.org/amigo/term/GO:0050657	MVP XPO1 RTRAF NUTF2 CPSF6 SRSF3 SRSF4 RAN SRRM1 HNRNPA1 DHX9 SSB EIF4E HNRNPA3 MYO1C
0.00944365253525605	15	197	2.58468414620003	RNA transport	http://amigo.geneontology.org/amigo/term/GO:0050658	MVP XPO1 RTRAF NUTF2 CPSF6 SRSF3 SRSF4 RAN SRRM1 HNRNPA1 DHX9 SSB EIF4E HNRNPA3 MYO1C
0.00648738156156622	15	188	2.70841902553939	Organelle localization by membrane tethering	http://amigo.geneontology.org/amigo/term/GO:0140056	PAFAH1B1 STXBP2 DYNC1I2 MAPRE1 RAB3D PPP2R1A PLEK USO1 STX3 TUBB4B DYNC1H1 DCTN1 TUBB NSF PRKACA
0.00538484797653024	15	184	2.76729770000764	Cytosolic transport	http://amigo.geneontology.org/amigo/term/GO:0016482	VPS35 EPS15 MAPK1 EEA1 VPS29 SNX3 RAB14 RDX MAP2K1 KIF5B RAB6A AP2A1 DCTN1 SNX2 CES1
0.00255029763359938	15	169	3.01291583906157	Cytoplasmic translation	http://amigo.geneontology.org/amigo/term/GO:0002181	EIF4B RPS5 EIF3B EIF3A RPS12 DHX9 RPL35 RPS6 DENR RPS8 RPS3 EIF4A1 EIF3F RPL10A EIF3CL
0.00247521981906119	15	168	3.03084986191313	Regulation of microtubule cytoskeleton organization	http://amigo.geneontology.org/amigo/term/GO:0070507	PAFAH1B1 RHOA ROCK1 CHMP5 MAPRE1 CHMP4B STMN1 EML2 CHMP2A CLIP1 NUMA1 RPS3 DYNC1H1 DCTN1 CHMP1B
0.000279702851879468	15	133	3.82844193083764	Regulation of stem cell differentiation	http://amigo.geneontology.org/amigo/term/GO:2000736	PSMD5 PSMD8 PSMC6 PSMB5 PSMD10 PSMD9 PSMB2 PSMC2 PSMD6 PSMC3 PSMD1 PSMD12 PSMB3 PSMC4 PSME1
3.51700086218645e-05	15	110	4.62893433455824	Regulation of hematopoietic progenitor cell differentiation	http://amigo.geneontology.org/amigo/term/GO:1901532	PSMD5 PSMD8 PSMC6 PSMB5 PSMD10 PSMD9 PSMB2 PSMC2 PSMD6 PSMC3 PSMD1 PSMD12 PSMB3 PSMC4 PSME1
1.27037044693195e-05	15	101	5.04141363169709	Regulation of cellular amine metabolic process	http://amigo.geneontology.org/amigo/term/GO:0033238	PSMD5 PSMD8 PSMC6 PSMB5 PSMD10 PSMD9 PSMB2 PSMC2 PSMD6 PSMC3 PSMD1 PSMD12 PSMB3 PSMC4 PSME1
7.8998370348063e-06	15	97	5.24930697733408	Regulation of transcription from RNA polymerase II promoter in response to hypoxia	http://amigo.geneontology.org/amigo/term/GO:0061418	PSMD5 PSMD8 PSMC6 PSMB5 PSMD10 PSMD9 PSMB2 PSMC2 PSMD6 PSMC3 PSMD1 PSMD12 PSMB3 PSMC4 PSME1
4.73410299203402e-06	15	92	5.53459540001528	Regulation of hematopoietic stem cell differentiation	http://amigo.geneontology.org/amigo/term/GO:1902036	PSMD5 PSMD8 PSMC6 PSMB5 PSMD10 PSMD9 PSMB2 PSMC2 PSMD6 PSMC3 PSMD1 PSMD12 PSMB3 PSMC4 PSME1
1.6707787993063e-06	15	84	6.06169972382626	Pre-replicative complex assembly	http://amigo.geneontology.org/amigo/term/GO:0036388	PSMD5 PSMD8 PSMC6 PSMB5 PSMD10 PSMD9 PSMB2 PSMC2 PSMD6 PSMC3 PSMD1 PSMD12 PSMB3 PSMC4 PSME1
1.46884033126869e-06	15	83	6.13473225061935	Regulation of cellular amino acid metabolic process	http://amigo.geneontology.org/amigo/term/GO:0006521	PSMD5 PSMD8 PSMC6 PSMB5 PSMD10 PSMD9 PSMB2 PSMC2 PSMD6 PSMC3 PSMD1 PSMD12 PSMB3 PSMC4 PSME1
0.0737663655861734	14	241	1.97193883131941	Cellular response to insulin stimulus	http://amigo.geneontology.org/amigo/term/GO:0032869	GCLC GNAI2 ATP6V1A IDE ATP6V1F CSRP3 USO1 PRKCD TRIM72 GRB2 PTPN11 MYO1C APRT PKLR
0.0660662517801409	14	236	2.01371719638974	Regulation of muscle system process	http://amigo.geneontology.org/amigo/term/GO:0090257	HSPB6 RHOA ROCK1 TNNT1 MTPN CAV1 GLRX3 CASQ2 IL6ST CAMK2D CALM3 DAG1 ATP2A1 PRKACA
0.05901540449567	14	232	2.04843645839646	Endothelial cell migration	http://amigo.geneontology.org/amigo/term/GO:0043542	DCN GRN RHOA SH3BP1 ATP5F1B PDCD10 GLUL PRCP ATP5F1A CORO1B HMGB1 PDCD6 ITGB3 GFUS
0.0453914998569078	14	222	2.14070837093684	Regulation of endocytosis	http://amigo.geneontology.org/amigo/term/GO:0030100	ROCK1 TSG101 DNM2 CAV1 SFRP4 PPP3CB RAB5C NCKAP1L RAB17 CALM3 AP2M1 AP2A1 PLCG2 ITGB3
0.0441700046027308	14	221	2.15039483415375	Regulation of cell-substrate adhesion	http://amigo.geneontology.org/amigo/term/GO:0010810	SLK RHOA ROCK1 DNM2 CCDC80 CRKL PPM1F OLFM4 GBP1 RSU1 DAG1 PTPN11 GFUS RCC2
0.0391199597583951	14	217	2.1900334486082	Purine nucleotide biosynthetic process	http://amigo.geneontology.org/amigo/term/GO:0006164	DLD ATP5F1D ATP5F1B ATP6V1A PAICS AMPD3 ATIC ATP5F1A ATP5MC3 NUDT2 FASN ADSS1 APRT NME1
0.0349056955429504	14	213	2.23116083731446	Positive regulation of DNA metabolic process	http://amigo.geneontology.org/amigo/term/GO:0051054	WAS XRCC5 MAPK1 PTGES3 CCT4 HNRNPA1 CCT7 DHX9 PML RPS3 CCT8 CCT3 PRKCD HMGB1
0.0339108239936649	14	212	2.24168518088669	Regulation of protein localization to membrane	http://amigo.geneontology.org/amigo/term/GO:1905475	CRKL CSK GBP1 CSRP3 AP2M1 STX3 KIF5B PRNP DAG1 RHOG MYO1C GDI1 RACK1 FIS1
0.0327061975638359	14	211	2.25230928127004	Regulation of organelle assembly	http://amigo.geneontology.org/amigo/term/GO:1902115	RHOA TSG101 DNM2 CHMP5 CHMP4B CHMP2A NUMA1 RDX ATG3 ASAP1 SEPTIN9 DYNC1H1 CHMP1B CHMP4A
0.0180943849179846	14	193	2.46236921423823	Purine ribonucleotide biosynthetic process	http://amigo.geneontology.org/amigo/term/GO:0009152	DLD ATP5F1D ATP5F1B ATP6V1A PAICS AMPD3 ATIC ATP5F1A ATP5MC3 NUDT2 FASN ADSS1 APRT NME1
0.0143095932636216	14	187	2.5413757130908	Regulation of actin filament polymerization	http://amigo.geneontology.org/amigo/term/GO:0030833	WAS RHOA MTPN NCKAP1L ARPC5L RDX TMOD3 ADD3 PRKCD CORO1B GRB2 HCLS1 MYO1C BRK1
0.0107791629150599	14	180	2.6402069908221	Cytokinesis	http://amigo.geneontology.org/amigo/term/GO:0000910	CUL3 RHOA ROCK1 CHMP5 CHMP4B STMN1 SEPTIN6 CHMP2A MYH10 SEPTIN11 CALM3 SEPTIN9 CHMP1B CHMP4A
0.00316472318686347	14	154	3.08595622303882	Post-Golgi vesicle-mediated transport	http://amigo.geneontology.org/amigo/term/GO:0006892	DNM2 EPS15 RP2 CSK NAPA CLINT1 RAB14 CLTA CHMP2A AP1S2 AP2A1 RACK1 TXNDC5 NSF
0.00262506361032335	14	151	3.14726661157602	Actin filament-based movement	http://amigo.geneontology.org/amigo/term/GO:0030048	WAS SUN2 TNNT1 CAV1 MYH3 MYH8 MYH10 MYO1F CAMK2D TCAP ATP2A1 MYH6 MYO1C MYH4
0.00262506361032335	14	151	3.14726661157602	Vesicle-mediated transport to the plasma membrane	http://amigo.geneontology.org/amigo/term/GO:0098876	EHD2 VPS35 DNM2 EPS15 CSK EHD1 VPS29 SNX3 RAB14 RAB17 STX3 ARHGAP1 RACK1 NSF
0.00190548994759562	14	145	3.27749833343434	Alcohol biosynthetic process	http://amigo.geneontology.org/amigo/term/GO:0046165	H6PD AKR1B1 SPTLC1 ERLIN1 NFKB1 PLEK ACAT2 RAN LBR QDPR ACAA2 PGP PLCG2 CES1
0.0757570515050349	13	218	2.02427403621354	Response to mechanical stimulus	http://amigo.geneontology.org/amigo/term/GO:0009612	GCLC DCN CYBA CNN2 RHOA MTPN NFKB1 CSRP3 CHI3L1 CASP1 DAG1 TCAP PTPN11
0.0757570515050349	13	218	2.02427403621354	Response to hexose	http://amigo.geneontology.org/amigo/term/GO:0009746	GCLC NADK GCLM CYBA RHOA PPP3CB GLUL PFKL KIF5B RACK1 FIS1 NME1 PRKACA
0.0631871788300004	13	211	2.09143004689361	Response to glucose	http://amigo.geneontology.org/amigo/term/GO:0009749	GCLC NADK GCLM CYBA RHOA PPP3CB GLUL PFKL KIF5B RACK1 FIS1 NME1 PRKACA
0.0569705163213302	13	207	2.13184415407996	Cellular response to radiation	http://amigo.geneontology.org/amigo/term/GO:0071478	CYBA XRCC5 DNM2 CRYAB TMEM109 EIF2S1 ADIRF IMPACT IFI16 PRKCD DDB1 GRB2 EEF1D
0.0546257153263119	13	205	2.15264263363196	Cellular response to starvation	http://amigo.geneontology.org/amigo/term/GO:0009267	MAPK1 STK24 CAV1 LAMTOR3 ATP6V1A ATP6V1F EIF2S1 LAMTOR5 HNRNPA1 GLUL IMPACT IFI16 UPP1
0.0383919705086108	13	194	2.2746996901781	Cytosolic calcium ion transport	http://amigo.geneontology.org/amigo/term/GO:0060401	CYBA FKBP1A CAV1 CASQ2 DIAPH1 PML CAMK2D CALM3 PRNP ERO1A PLCG2 LYN PRKACA
0.0289450198919888	13	185	2.38536075618677	Import into nucleus	http://amigo.geneontology.org/amigo/term/GO:0051170	IPO5 SNRPD3 MAPK1 NUTF2 UFM1 SNRPB RAN HNRNPA1 PML PRKCD HCLS1 KPNA4 IPO7
0.0260718102756631	13	182	2.4246798895305	Regulation of endothelial cell migration	http://amigo.geneontology.org/amigo/term/GO:0010594	DCN GRN RHOA SH3BP1 ATP5F1B PDCD10 GLUL PRCP ATP5F1A HMGB1 PDCD6 ITGB3 GFUS
0.0219591625183351	13	177	2.49317367172063	Positive regulation of cellular protein catabolic process	http://amigo.geneontology.org/amigo/term/GO:1903364	GCLC VPS35 PSMC6 PSMD10 CAV1 CTSC USP5 RDX PSMC2 PSMC3 RAD23A RACK1 PSMC4
0.0180943849179846	13	172	2.56564965054972	Positive regulation of cysteine-type endopeptidase activity	http://amigo.geneontology.org/amigo/term/GO:2001056	RHOA PPM1F HSPE1 CASP1 PML HSPD1 RPS3 AIFM1 IFI16 HMGB1 RACK1 FIS1 PDCD6
0.0154636104741534	13	168	2.62673654699138	Calcium ion transport into cytosol	http://amigo.geneontology.org/amigo/term/GO:0060402	CYBA FKBP1A CAV1 CASQ2 DIAPH1 PML CAMK2D CALM3 PRNP ERO1A PLCG2 LYN PRKACA
0.0124626075512823	13	163	2.70731128769664	Positive regulation of protein polymerization	http://amigo.geneontology.org/amigo/term/GO:0032273	WAS RHOA MAPRE1 NCKAP1L CLIP1 ARPC5L NUMA1 RPS3 CORO1B GRB2 MYO1C DCTN1 BRK1
0.0118673146083017	13	162	2.72402308576884	Protein localization to endoplasmic reticulum	http://amigo.geneontology.org/amigo/term/GO:0070972	RPS5 CHMP4B VAPA RPS12 RTN4 RPL35 RPS6 RPS8 SRP9 RPS3 GET3 RPL10A CHMP4A
0.00720266543165835	13	151	2.9224618536063	Regulation of type I interferon production	http://amigo.geneontology.org/amigo/term/GO:0032479	XRCC5 NFKB1 NMI LRRFIP1 DHX9 HSPD1 IFI16 HMGB2 PTPN11 UBA7 ISG15 HMGB1 PLCG2
0.00720266543165835	13	151	2.9224618536063	Type I interferon production	http://amigo.geneontology.org/amigo/term/GO:0032606	XRCC5 NFKB1 NMI LRRFIP1 DHX9 HSPD1 IFI16 HMGB2 PTPN11 UBA7 ISG15 HMGB1 PLCG2
0.00586889672911745	13	147	3.00198462513301	Regulation of protein localization to nucleus	http://amigo.geneontology.org/amigo/term/GO:1900180	IPO5 MAPK1 NUTF2 CCT4 UFM1 RAN LAMTOR5 CCT7 GLUL CCT8 CCT3 PRKCD HCLS1
0.0034019597229695	13	137	3.22110759047118	Response to acid chemical	http://amigo.geneontology.org/amigo/term/GO:0001101	GCLC GCLM CYBA IPO5 RHOA AKR1B1 LAMTOR3 LAMTOR5 AIFM1 CAPN2 KRT8 COL18A1 LYN
0.00119635053612224	13	120	3.67743116578793	Polysaccharide metabolic process	http://amigo.geneontology.org/amigo/term/GO:0005976	PYGB GYS1 NFKB1 PTGES3 GBE1 CHIT1 IL6ST PFKM AGL PGM2 PPP1CA HMGB1 AP2A1
5.58008943353049e-05	13	86	5.13129930109944	Fc receptor mediated stimulatory signaling pathway	http://amigo.geneontology.org/amigo/term/GO:0002431	FGR WAS MAPK1 CSK NCKAP1L PRKCD GRB2 CD47 MYO1C PLCG2 FCGR3A LYN BRK1
0.0716149358962955	12	192	2.12159490333919	Positive regulation of intracellular protein transport	http://amigo.geneontology.org/amigo/term/GO:0090316	IPO5 MAPK1 NUTF2 PDCD10 RAN PRKCD KIF5B PRNP HCLS1 UBE2L3 MYO1C FIS1
0.0674476894138438	12	190	2.14392748126908	Receptor metabolic process	http://amigo.geneontology.org/amigo/term/GO:0043112	DNM2 EPS15 CHMP5 CAV1 SFRP4 CLTA AP2M1 GRB2 AP2A1 PLCG2 ITGB3 NSF
0.047530508146576	12	178	2.28846191820857	Striated muscle contraction	http://amigo.geneontology.org/amigo/term/GO:0006941	TNNT1 CAV1 MYH3 CASQ2 CSRP3 MYH8 CAMK2D CALM3 TCAP ATP2A1 MYH6 PRKACA
0.0375573313339359	12	171	2.38214164585453	Actin filament bundle organization	http://amigo.geneontology.org/amigo/term/GO:0061572	WAS CUL3 RHOA ROCK1 PPM1F PLEK STMN1 SWAP70 RDX CORO1B PAK2 CD47
0.0361447761547366	12	170	2.39615424377132	Regulation of protein dephosphorylation	http://amigo.geneontology.org/amigo/term/GO:0035304	ROCK1 FKBP1A PPP6R1 PPP2R1A GNAI2 PPP1R7 PTPA NCKAP1L SWAP70 TIPRL CALM3 PRKCD
0.0324187658222536	12	167	2.43919893078518	Actin filament bundle assembly	http://amigo.geneontology.org/amigo/term/GO:0051017	WAS CUL3 RHOA ROCK1 PPM1F PLEK STMN1 SWAP70 RDX CORO1B PAK2 CD47
0.0324187658222536	12	167	2.43919893078518	Muscle cell development	http://amigo.geneontology.org/amigo/term/GO:0055001	TNNT1 PRKAR1A MYH3 CSRP3 DYSF TMOD3 CFL2 KRT8 TCAP NACA MYH6 MYH11
0.0312410858364942	12	166	2.45389290024774	Negative regulation of cytoskeleton organization	http://amigo.geneontology.org/amigo/term/GO:0051494	WAS MAPRE1 MTPN STMN1 EML2 SWAP70 RDX TMOD3 ADD3 PRKCD CORO1B PAK2
0.0262262205550586	12	161	2.5301007542927	Regulation of calcium ion transmembrane transport	http://amigo.geneontology.org/amigo/term/GO:1903169	CYBA FKBP1A CASQ2 DIAPH1 CAMK2D CALM3 S100A1 PRNP ATP2A1 PLCG2 LYN PRKACA
0.0232212729067974	12	158	2.57814064203244	Positive regulation of inflammatory response	http://amigo.geneontology.org/amigo/term/GO:0050729	GRN KARS1 IFI35 CTSC NMI ALOX5AP IL6ST DHX9 HSPD1 IL16 CD47 TGM2
0.0209752984690014	12	155	2.62804013832984	Plasma membrane organization	http://amigo.geneontology.org/amigo/term/GO:0007009	EHD2 DNM2 CAV1 PPP1R7 CSRP3 DYSF ASAP1 PRKCD CAVIN2 TRIM72 NSF CHMP4A
0.0199353812085173	12	154	2.64510533403328	Positive regulation of cysteine-type endopeptidase activity involved in apoptotic process	http://amigo.geneontology.org/amigo/term/GO:0043280	RHOA PPM1F HSPE1 CASP1 PML HSPD1 RPS3 AIFM1 HMGB1 RACK1 FIS1 PDCD6
0.0106421610146246	12	140	2.90961586743661	Response to hydrogen peroxide	http://amigo.geneontology.org/amigo/term/GO:0042542	STK24 PPP2CB CRYAB PDCD10 HSPD1 RPS3 IMPACT AIFM1 CAPN2 PRKCD PTPN11 RACK1
0.00839388075420507	12	135	3.01737941808241	Regulation of protein localization to cell periphery	http://amigo.geneontology.org/amigo/term/GO:1904375	CSK GBP1 CSRP3 NUMA1 EPB41 AP2M1 STX3 KIF5B PRNP DAG1 RHOG RACK1
0.00759582935685378	12	133	3.06275354467011	Apoptotic mitochondrial changes	http://amigo.geneontology.org/amigo/term/GO:0008637	GCLC PLAUR GCLM VPS35 PSMD10 PPP2CB IFIT2 HSPD1 ATG3 ACAA2 ATP2A1 FIS1
0.00185723320629764	12	110	3.70314746764659	Cellular component assembly involved in morphogenesis	http://amigo.geneontology.org/amigo/term/GO:0010927	PAFAH1B1 TNNT1 PRKAR1A MYH3 CSRP3 TMOD3 CFL2 KRT8 DAG1 TCAP MYH6 MYH11
0.00114068114977553	12	103	3.95481768389442	Cytoskeleton-dependent cytokinesis	http://amigo.geneontology.org/amigo/term/GO:0061640	RHOA ROCK1 CHMP5 CHMP4B STMN1 SEPTIN6 CHMP2A MYH10 SEPTIN11 SEPTIN9 CHMP1B CHMP4A
0.000173599236416307	12	82	4.96763684684298	Fc-gamma receptor signaling pathway	http://amigo.geneontology.org/amigo/term/GO:0038094	FGR WAS MAPK1 NCKAP1L PRKCD GRB2 CD47 MYO1C PLCG2 FCGR3A LYN BRK1
0.000138397651045946	12	80	5.09182776801406	Immune response-regulating cell surface receptor signaling pathway involved in phagocytosis	http://amigo.geneontology.org/amigo/term/GO:0002433	FGR WAS MAPK1 NCKAP1L PRKCD GRB2 CD47 MYO1C PLCG2 FCGR3A LYN BRK1
0.000138397651045946	12	80	5.09182776801406	Fc-gamma receptor signaling pathway involved in phagocytosis	http://amigo.geneontology.org/amigo/term/GO:0038096	FGR WAS MAPK1 NCKAP1L PRKCD GRB2 CD47 MYO1C PLCG2 FCGR3A LYN BRK1
8.48592902097686e-05	12	76	5.35981870317269	COPII-coated vesicle budding	http://amigo.geneontology.org/amigo/term/GO:0090114	CUL3 CD59 TMED2 CTSZ VAPA PPP6R1 NAPA CTSC TFG USO1 PDCD6 NSF
0.0766589078546596	11	172	2.17093431969592	Vacuolar transport	http://amigo.geneontology.org/amigo/term/GO:0007034	VTA1 GRN VPS35 TSG101 CHMP5 CHMP4B CHMP2A SNAPIN PSAP CHMP1B CHMP4A
0.07143156243341	11	169	2.20947161531182	Activation of protein kinase activity	http://amigo.geneontology.org/amigo/term/GO:0032147	STK3 PRKAR1A PRKAR2A NCKAP1L CHI3L1 PRKCD PRNP PAK2 HMGB1 ITGB3 PRKACA
0.0554565983449793	11	161	2.31925902476831	MRNA transport	http://amigo.geneontology.org/amigo/term/GO:0051028	MVP XPO1 NUTF2 SRSF3 SRSF4 SRRM1 HNRNPA1 DHX9 EIF4E HNRNPA3 MYO1C
0.0453914998569078	11	155	2.40903679346902	Response to calcium ion	http://amigo.geneontology.org/amigo/term/GO:0051592	CPNE3 RANBP1 CAV1 CASQ2 ALOX5AP CAMK2D CALM3 S100A16 PLCG2 GDI1 PDCD6
0.0453914998569078	11	155	2.40903679346902	Positive regulation of proteolysis involved in cellular protein catabolic process	http://amigo.geneontology.org/amigo/term/GO:1903052	GCLC PSMC6 PSMD10 CAV1 CTSC USP5 PSMC2 PSMC3 RAD23A RACK1 PSMC4
0.0438398531915673	11	154	2.4246798895305	Response to ionizing radiation	http://amigo.geneontology.org/amigo/term/GO:0010212	CYBA KARS1 XRCC5 DNM2 CRYAB TMEM109 PML LZIC IFI16 GRB2 EEF1D
0.0425993002168151	11	153	2.44052747050783	Regulation of reactive oxygen species metabolic process	http://amigo.geneontology.org/amigo/term/GO:2000377	CYBA RHOA RAB27A CRYAB GNAI2 NQO2 PRCP HSPD1 CBR1 PRKCD GRB2
0.0365946882887351	11	149	2.50604498649462	Calcium ion transmembrane import into cytosol	http://amigo.geneontology.org/amigo/term/GO:0097553	CYBA FKBP1A CASQ2 DIAPH1 CAMK2D CALM3 PRNP ERO1A PLCG2 LYN PRKACA
0.0312410858364942	11	145	2.57517726198412	Negative regulation of protein-containing complex assembly	http://amigo.geneontology.org/amigo/term/GO:0031333	MAPRE1 MTPN CRYAB STMN1 EML2 RDX TMOD3 ADD3 IMPACT PRKCD HMGB1
0.0292235101523477	11	143	2.6111937271867	Polyol metabolic process	http://amigo.geneontology.org/amigo/term/GO:0019751	AKR1B1 SPTLC1 MINPP1 PLEK SORD TKFC QDPR BPNT1 PGP PLCG2 NUDT3
0.0184469999467231	11	132	2.82879320445226	Establishment of protein localization to endoplasmic reticulum	http://amigo.geneontology.org/amigo/term/GO:0072599	RPS5 CHMP4B RPS12 RPL35 RPS6 RPS8 SRP9 RPS3 GET3 RPL10A CHMP4A
0.0160183299519251	11	129	2.89457909292789	Negative regulation of establishment of protein localization	http://amigo.geneontology.org/amigo/term/GO:1904950	ERP29 PPM1F CSK PSMD9 SNX3 UFM1 HADH PFKL PTPN11 IDH2 GDI1
0.0152884445703526	11	128	2.91719299209139	Protein targeting to ER	http://amigo.geneontology.org/amigo/term/GO:0045047	RPS5 CHMP4B RPS12 RPL35 RPS6 RPS8 SRP9 RPS3 GET3 RPL10A CHMP4A
0.0118105525638481	11	123	3.03577807307071	Negative regulation of protein transport	http://amigo.geneontology.org/amigo/term/GO:0051224	ERP29 PPM1F CSK PSMD9 SNX3 UFM1 HADH PFKL PTPN11 IDH2 GDI1
0.0068790825132421	11	113	3.30443099989113	Regulation of nucleocytoplasmic transport	http://amigo.geneontology.org/amigo/term/GO:0046822	IPO5 XPO1 MAPK1 NUTF2 CPSF6 UFM1 RAN DHX9 PRKCD PTPN11 HCLS1
0.00393174020378503	11	104	3.59039137488171	Regulation of calcium ion transport into cytosol	http://amigo.geneontology.org/amigo/term/GO:0010522	CYBA FKBP1A CAV1 CASQ2 DIAPH1 PML CAMK2D CALM3 PRNP LYN PRKACA
0.00255029763359938	11	98	3.81021125497651	Vesicle targeting	http://amigo.geneontology.org/amigo/term/GO:0006903	CUL3 CD59 TMED2 CTSZ PPP6R1 NAPA CTSC TFG USO1 PDCD6 NSF
0.001667087830343	11	92	4.05870329334454	Positive regulation of protein localization to nucleus	http://amigo.geneontology.org/amigo/term/GO:1900182	IPO5 MAPK1 NUTF2 CCT4 RAN LAMTOR5 CCT7 CCT8 CCT3 PRKCD HCLS1
0.00119635053612224	11	88	4.24318980667838	Nuclear envelope organization	http://amigo.geneontology.org/amigo/term/GO:0006998	PAFAH1B1 NSFL1C SUN2 CHMP4B UBE2I PPP2R1A CHMP2A RAN LBR DCTN1 CHMP4A
0.00042485878352106	11	77	4.84935977906101	Vesicle targeting, to, from or within Golgi	http://amigo.geneontology.org/amigo/term/GO:0048199	CUL3 CD59 TMED2 CTSZ PPP6R1 NAPA CTSC TFG USO1 PDCD6 NSF
0.000279702851879468	11	73	5.11507812311915	Vesicle coating	http://amigo.geneontology.org/amigo/term/GO:0006901	CUL3 CD59 TMED2 CTSZ PPP6R1 NAPA CTSC TFG USO1 PDCD6 NSF
0.000180628901477806	11	69	5.41160439112605	Vesicle targeting, rough ER to cis-Golgi	http://amigo.geneontology.org/amigo/term/GO:0048207	CUL3 CD59 TMED2 CTSZ PPP6R1 NAPA CTSC TFG USO1 PDCD6 NSF
0.000180628901477806	11	69	5.41160439112605	COPII vesicle coating	http://amigo.geneontology.org/amigo/term/GO:0048208	CUL3 CD59 TMED2 CTSZ PPP6R1 NAPA CTSC TFG USO1 PDCD6 NSF
0.0810202494568074	10	151	2.24804757969716	Cellular response to reactive oxygen species	http://amigo.geneontology.org/amigo/term/GO:0034614	MAPK1 PDCD10 ADPRS RPS3 IMPACT AIFM1 PRKCD CCS PTPN11 RACK1
0.0783668480836226	10	150	2.2630345635618	Positive regulation of epithelial cell migration	http://amigo.geneontology.org/amigo/term/GO:0010634	GRN PPM1F ATP5F1B RTN4 ATP5F1A HMGB1 PLCG2 PDCD6 ITGB3 GFUS
0.0783668480836226	10	150	2.2630345635618	Cellular response to monosaccharide stimulus	http://amigo.geneontology.org/amigo/term/GO:0071326	GCLC NADK GCLM CYBA PPP3CB KIF5B RACK1 FIS1 NME1 PRKACA
0.0760753811684192	10	149	2.27822271499511	Cellular response to hexose stimulus	http://amigo.geneontology.org/amigo/term/GO:0071331	GCLC NADK GCLM CYBA PPP3CB KIF5B RACK1 FIS1 NME1 PRKACA
0.0717898298628598	10	147	2.30921894241	Cellular response to glucose stimulus	http://amigo.geneontology.org/amigo/term/GO:0071333	GCLC NADK GCLM CYBA PPP3CB KIF5B RACK1 FIS1 NME1 PRKACA
0.0674476894138438	10	145	2.34107023816738	Establishment of cell polarity	http://amigo.geneontology.org/amigo/term/GO:0030010	PAFAH1B1 RHOA ROCK1 NSFL1C CRKL SH3BP1 DOCK2 NUMA1 RACK1 DCTN1
0.0653008351103736	10	144	2.35732767037688	Regulation of phosphoprotein phosphatase activity	http://amigo.geneontology.org/amigo/term/GO:0043666	ROCK1 FKBP1A PPP6R1 PPP2R1A GNAI2 PPP1R7 PTPA NCKAP1L TIPRL CALM3
0.0653008351103736	10	144	2.35732767037688	Positive regulation of protein modification by small protein conjugation or removal	http://amigo.geneontology.org/amigo/term/GO:1903322	CUL3 FKBP1A PSMD10 CAV1 SKP1 NMI UBA2 RNF111 UBE2L3 PDCD6
0.0626978791531059	10	143	2.37381247926063	ERBB signaling pathway	http://amigo.geneontology.org/amigo/term/GO:0038127	PLAUR MVP TSG101 CPNE3 EPS15 MAPK1 RTN4 EPS15L1 GRB2 PTPN11
0.0520718200064364	10	137	2.47777506959322	Platelet degranulation	http://amigo.geneontology.org/amigo/term/GO:0002576	STXBP2 PLEK SRGN OLA1 MMRN1 PF4 PSAP LYN ITGB3 ISLR
0.0500254720002088	10	136	2.49599400392846	Positive regulation of apoptotic signaling pathway	http://amigo.geneontology.org/amigo/term/GO:2001235	STK3 CAV1 CTSC PML RPS3 PRKCD PPP1CA PAK2 RACK1 FIS1
0.0458732433851928	10	134	2.53324764577814	Positive regulation of proteasomal protein catabolic process	http://amigo.geneontology.org/amigo/term/GO:1901800	GCLC PSMC6 PSMD10 CAV1 USP5 PSMC2 PSMC3 RAD23A RACK1 PSMC4
0.0441700046027308	10	133	2.55229462055843	Sequestering of calcium ion	http://amigo.geneontology.org/amigo/term/GO:0051208	CYBA FKBP1A CASQ2 DIAPH1 CAMK2D CALM3 ERO1A PLCG2 LYN PRKACA
0.0378272259688268	10	129	2.63143553902535	Regulation of sequestering of calcium ion	http://amigo.geneontology.org/amigo/term/GO:0051282	CYBA FKBP1A CASQ2 DIAPH1 CAMK2D CALM3 ERO1A PLCG2 LYN PRKACA
0.0362021132141946	10	128	2.65199362917399	Spindle assembly	http://amigo.geneontology.org/amigo/term/GO:0051225	RHOA CHMP5 MAPRE1 CHMP4B SMC3 CHMP2A NUMA1 RPS3 DYNC1H1 CHMP1B
0.0348208840964852	10	127	2.67287546877379	Positive regulation of cell-substrate adhesion	http://amigo.geneontology.org/amigo/term/GO:0010811	ROCK1 DNM2 CCDC80 CRKL PPM1F OLFM4 RSU1 DAG1 PTPN11 GFUS
0.0348208840964852	10	127	2.67287546877379	Negative regulation of sequestering of calcium ion	http://amigo.geneontology.org/amigo/term/GO:0051283	CYBA FKBP1A CASQ2 DIAPH1 CAMK2D CALM3 ERO1A PLCG2 LYN PRKACA
0.0333383246891234	10	126	2.69408876614501	Release of sequestered calcium ion into cytosol	http://amigo.geneontology.org/amigo/term/GO:0051209	CYBA FKBP1A CASQ2 DIAPH1 CAMK2D CALM3 ERO1A PLCG2 LYN PRKACA
0.0333383246891234	10	126	2.69408876614501	Cornification	http://amigo.geneontology.org/amigo/term/GO:0070268	KRT36 SPINK5 KRT82 LCE3D KLK13 KRT8 KRT75 KRT76 KRT79 RPTN
0.0317668620354171	10	125	2.71564147627417	Macrophage activation	http://amigo.geneontology.org/amigo/term/GO:0042116	GRN KARS1 IFI35 CTSC NMI DYSF HSPD1 VSIG4 HMGB1 MIF
0.0233886382941164	10	118	2.87673885198534	Regulation of DNA biosynthetic process	http://amigo.geneontology.org/amigo/term/GO:2000278	XRCC5 HNRNPC MAPK1 PTGES3 CCT4 HNRNPA1 CCT7 PML CCT8 CCT3
0.0228133673563415	10	117	2.90132636354077	Response to amino acid	http://amigo.geneontology.org/amigo/term/GO:0043200	GCLC GCLM CYBA IPO5 RHOA LAMTOR3 LAMTOR5 AIFM1 CAPN2 LYN
0.0160183299519251	10	110	3.08595622303882	Cellular polysaccharide metabolic process	http://amigo.geneontology.org/amigo/term/GO:0044264	PYGB GYS1 PTGES3 GBE1 IL6ST PFKM AGL PGM2 PPP1CA HMGB1
0.0128527304112815	10	106	3.2024074012667	Regulation of actin filament bundle assembly	http://amigo.geneontology.org/amigo/term/GO:0032231	WAS RHOA ROCK1 PPM1F PLEK STMN1 SWAP70 RDX PAK2 CD47
0.0128527304112815	10	106	3.2024074012667	Muscle adaptation	http://amigo.geneontology.org/amigo/term/GO:0043500	CYBA ROCK1 TNNT1 MTPN GLRX3 IL6ST CAMK2D DAG1 TCAP MYH6
0.00958020779070968	10	101	3.36094242113139	Dicarboxylic acid metabolic process	http://amigo.geneontology.org/amigo/term/GO:0043648	GCLC GCLM DLD FH GOT2 GLUL ATIC ALDH1L1 IDH2 ADSS1
0.0086229024334214	10	99	3.42884024782092	Positive regulation of type I interferon production	http://amigo.geneontology.org/amigo/term/GO:0032481	XRCC5 NFKB1 LRRFIP1 DHX9 HSPD1 IFI16 HMGB2 PTPN11 HMGB1 PLCG2
0.00663861829057269	10	95	3.5732124687818	Vascular endothelial growth factor receptor signaling pathway	http://amigo.geneontology.org/amigo/term/GO:0048010	CYBA RHOA ROCK1 NCF4 NCF2 NCKAP1L PAK2 PDCD6 BRK1 ITGB3
0.00580040455110956	10	93	3.65005574768033	Energy reserve metabolic process	http://amigo.geneontology.org/amigo/term/GO:0006112	PYGB GYS1 PTGES3 GBE1 IL6ST PFKM AGL PGM2 PPP1CA HMGB1
0.0049979321769413	10	91	3.73027675312385	Telomere maintenance via telomere lengthening	http://amigo.geneontology.org/amigo/term/GO:0010833	XRCC5 HNRNPC MAPK1 PTGES3 CCT4 HNRNPA1 CCT7 PML CCT8 CCT3
0.00298078477552462	10	84	4.04113314921751	Endosome organization	http://amigo.geneontology.org/amigo/term/GO:0007032	VTA1 RAB27A TSG101 CHMP5 CHMP4B EEA1 SNX3 CHMP2A CHMP1B CHMP4A
0.00255029763359938	10	82	4.13969737236915	Cellular glucan metabolic process	http://amigo.geneontology.org/amigo/term/GO:0006073	PYGB GYS1 PTGES3 GBE1 IL6ST PFKM AGL PGM2 PPP1CA HMGB1
0.00255029763359938	10	82	4.13969737236915	Glucan metabolic process	http://amigo.geneontology.org/amigo/term/GO:0044042	PYGB GYS1 PTGES3 GBE1 IL6ST PFKM AGL PGM2 PPP1CA HMGB1
0.00239040516299042	10	81	4.19080474733668	Glycogen metabolic process	http://amigo.geneontology.org/amigo/term/GO:0005977	PYGB GYS1 PTGES3 GBE1 IL6ST PFKM AGL PGM2 PPP1CA HMGB1
0.00239040516299042	10	81	4.19080474733668	RNA-dependent DNA biosynthetic process	http://amigo.geneontology.org/amigo/term/GO:0006278	XRCC5 HNRNPC MAPK1 PTGES3 CCT4 HNRNPA1 CCT7 PML CCT8 CCT3
0.00200269635740629	10	79	4.29690107005406	Telomere maintenance via telomerase	http://amigo.geneontology.org/amigo/term/GO:0007004	XRCC5 HNRNPC MAPK1 PTGES3 CCT4 HNRNPA1 CCT7 PML CCT8 CCT3
0.00170431618839949	10	77	4.40850889005546	Nuclear membrane organization	http://amigo.geneontology.org/amigo/term/GO:0071763	PAFAH1B1 NSFL1C CHMP4B UBE2I PPP2R1A CHMP2A RAN LBR DCTN1 CHMP4A
0.00141610276741221	10	75	4.52606912712361	Mitotic cytokinesis	http://amigo.geneontology.org/amigo/term/GO:0000281	RHOA ROCK1 CHMP5 CHMP4B STMN1 SEPTIN6 CHMP2A MYH10 CHMP1B CHMP4A
0.000574749584028233	10	66	5.14326037173137	Striated muscle cell development	http://amigo.geneontology.org/amigo/term/GO:0055002	TNNT1 PRKAR1A MYH3 CSRP3 TMOD3 CFL2 KRT8 TCAP MYH6 MYH11
0.000512507482078287	10	65	5.2223874543734	Myofibril assembly	http://amigo.geneontology.org/amigo/term/GO:0030239	TNNT1 PRKAR1A MYH3 CSRP3 TMOD3 CFL2 KRT8 TCAP MYH6 MYH11
0.0784898495085284	9	128	2.38679426625659	Axon extension	http://amigo.geneontology.org/amigo/term/GO:0048675	PAFAH1B1 DNM2 ARHGAP4 DPYSL2 PPP3CB RTN4 ALCAM LAMB2 GDI1
0.0731212227002586	9	126	2.4246798895305	Peptidyl-threonine phosphorylation	http://amigo.geneontology.org/amigo/term/GO:0018107	ROCK1 UBE2K MAPK1 CHI3L1 CAMK2D CALM3 PRKCD MAP2K1 OXSR1
0.0688042566633096	9	124	2.46378762968422	Integrin-mediated signaling pathway	http://amigo.geneontology.org/amigo/term/GO:0007229	FGR CUL3 FYB1 PLEK PTPN11 ISG15 CD47 ITGB3 RCC2
0.0688042566633096	9	124	2.46378762968422	Positive regulation of protein ubiquitination	http://amigo.geneontology.org/amigo/term/GO:0031398	CUL3 FKBP1A PSMD10 CAV1 SKP1 NMI RNF111 UBE2L3 PDCD6
0.05901540449567	9	120	2.54591388400703	Protein depolymerization	http://amigo.geneontology.org/amigo/term/GO:0051261	SH3BP1 MTPN PLEK STMN1 SWAP70 RDX TMOD3 ADD3 CFL2
0.05901540449567	9	120	2.54591388400703	Actin-mediated cell contraction	http://amigo.geneontology.org/amigo/term/GO:0070252	TNNT1 CAV1 MYH3 MYH8 CAMK2D TCAP ATP2A1 MYH6 MYH4
0.05901540449567	9	120	2.54591388400703	Positive regulation of chromosome organization	http://amigo.geneontology.org/amigo/term/GO:2001252	XRCC5 MAPK1 CCT4 HNRNPA1 CCT7 NUMA1 PML CCT8 CCT3
0.0551017983895197	9	118	2.58906496678681	Nucleotide-excision repair	http://amigo.geneontology.org/amigo/term/GO:0006289	COPS4 COPS7B RNF111 COPS2 DDB1 COPS6 GPS1 RAD23A HMGB1
0.0551017983895197	9	118	2.58906496678681	Cotranslational protein targeting to membrane	http://amigo.geneontology.org/amigo/term/GO:0006613	RPS5 RPS12 SSR1 RPL35 RPS6 RPS8 SRP9 RPS3 RPL10A
0.0518696090042117	9	116	2.63370401793831	Regulation of oxidoreductase activity	http://amigo.geneontology.org/amigo/term/GO:0051341	CYBA DNM2 CAV1 NFKB1 GNAI2 CALM3 S100A1 CCS DDAH2
0.0451557072338604	9	113	2.70362536354729	Regulation of protein localization to plasma membrane	http://amigo.geneontology.org/amigo/term/GO:1903076	CSK GBP1 CSRP3 AP2M1 STX3 KIF5B PRNP RHOG RACK1
0.0394799113373586	9	110	2.77736060073494	Nucleoside triphosphate metabolic process	http://amigo.geneontology.org/amigo/term/GO:0009141	RHOA ATP5F1D ATP5F1B ATP6V1A RAN ATP5F1A ATP5MC3 NUDT2 NME1
0.0394799113373586	9	110	2.77736060073494	Positive regulation of neuron death	http://amigo.geneontology.org/amigo/term/GO:1901216	GRN RHOA CTSZ NQO2 EIF2S1 AIFM1 CAPN2 PRNP FIS1
0.0348074820472013	9	107	2.85523052412003	Ciliary basal body-plasma membrane docking	http://amigo.geneontology.org/amigo/term/GO:0097711	PAFAH1B1 DYNC1I2 MAPRE1 PPP2R1A TUBB4B DYNC1H1 DCTN1 TUBB PRKACA
0.0299247008794464	9	104	2.93759294308503	Regulation of biological process involved in symbiotic interaction	http://amigo.geneontology.org/amigo/term/GO:0043903	TSG101 CHMP4B VAPA CAV1 SNX3 CHMP2A PML DDB1 BPIFA1
0.0299247008794464	9	104	2.93759294308503	Membrane biogenesis	http://amigo.geneontology.org/amigo/term/GO:0044091	NSFL1C CHMP4B UBE2I PPP2R1A CAV1 CHMP2A RAN LBR CHMP4A
0.0228133673563415	9	98	3.11744557225351	Membrane assembly	http://amigo.geneontology.org/amigo/term/GO:0071709	NSFL1C CHMP4B UBE2I PPP2R1A CAV1 CHMP2A RAN LBR CHMP4A
0.0161765577373316	9	92	3.32075724000917	Regulation of telomere maintenance	http://amigo.geneontology.org/amigo/term/GO:0032204	XRCC5 HNRNPC MAPK1 CCT4 HNRNPA1 CCT7 PML CCT8 CCT3
0.0161765577373316	9	92	3.32075724000917	Cellular carbohydrate biosynthetic process	http://amigo.geneontology.org/amigo/term/GO:0034637	AKR1B1 GYS1 PTGES3 GBE1 FBP2 AGL PGM2 PPP1CA PGP
0.0127216560541188	9	88	3.47170075091868	Ribonucleoside triphosphate metabolic process	http://amigo.geneontology.org/amigo/term/GO:0009199	RHOA ATP5F1D ATP5F1B ATP6V1A RAN ATP5F1A ATP5MC3 NUDT2 NME1
0.0127216560541188	9	88	3.47170075091868	Chromosome localization	http://amigo.geneontology.org/amigo/term/GO:0050000	CUL3 CHMP5 NUDC CHMP4B CHMP2A NUMA1 DYNC1H1 CHMP1B CHMP4A
0.0118673146083017	9	87	3.51160535725108	Purine nucleoside triphosphate metabolic process	http://amigo.geneontology.org/amigo/term/GO:0009144	RHOA ATP5F1D ATP5F1B ATP6V1A RAN ATP5F1A ATP5MC3 NUDT2 NME1
0.011131741136925	9	86	3.55243797768423	Establishment of chromosome localization	http://amigo.geneontology.org/amigo/term/GO:0051303	CUL3 CHMP5 NUDC CHMP4B CHMP2A NUMA1 DYNC1H1 CHMP1B CHMP4A
0.0104829163635108	9	85	3.59423136565698	Muscle hypertrophy	http://amigo.geneontology.org/amigo/term/GO:0014896	CYBA ROCK1 MTPN GLRX3 CSRP3 IL6ST CAMK2D TCAP MYH6
0.00801480918762941	9	81	3.77172427260301	Purine ribonucleoside triphosphate metabolic process	http://amigo.geneontology.org/amigo/term/GO:0009205	RHOA ATP5F1D ATP5F1B ATP6V1A RAN ATP5F1A ATP5MC3 NUDT2 NME1
0.00801480918762941	9	81	3.77172427260301	Endocytic recycling	http://amigo.geneontology.org/amigo/term/GO:0032456	EHD2 VPS35 EPS15 EHD1 VPS29 SNX3 RAB14 RAB17 ARHGAP1
0.00307847335217386	9	69	4.42767632001223	Cortical cytoskeleton organization	http://amigo.geneontology.org/amigo/term/GO:0030865	PAFAH1B1 EHD2 RHOA ROCK1 PLEK NCKAP1L EPB41 RHOG FMNL1
0.00277998005208374	9	68	4.49278920707123	Metaphase plate congression	http://amigo.geneontology.org/amigo/term/GO:0051310	CUL3 CHMP5 NUDC CHMP4B CHMP2A NUMA1 DYNC1H1 CHMP1B CHMP4A
0.00255029763359938	9	67	4.55984576240065	Aminoglycan catabolic process	http://amigo.geneontology.org/amigo/term/GO:0006026	PGLYRP1 DCN NAGLU CHI3L1 CHIT1 GNS GUSB BGN PRELP
0.00255029763359938	9	67	4.55984576240065	Regulation of telomere maintenance via telomere lengthening	http://amigo.geneontology.org/amigo/term/GO:1904356	XRCC5 HNRNPC MAPK1 CCT4 HNRNPA1 CCT7 PML CCT8 CCT3
0.00104896056758169	9	58	5.26740803587661	Regulation of telomere maintenance via telomerase	http://amigo.geneontology.org/amigo/term/GO:0032210	XRCC5 HNRNPC MAPK1 CCT4 HNRNPA1 CCT7 PML CCT8 CCT3
0.000575082031782171	9	53	5.76433332228007	Cellular carbohydrate catabolic process	http://amigo.geneontology.org/amigo/term/GO:0044275	PYGB SORD TKFC PFKM AGL PGM2 GUSB PPP1CA HMGB1
1.23787700860525e-06	9	24	12.7295694200352	Negative regulation of phagocytosis	http://amigo.geneontology.org/amigo/term/GO:0050765	CNN2 CSK SNX3 DYSF ATG3 HMGB1 CD47 RACK1 PRTN3
0.066273476654722	8	102	2.66239360419036	Glycosyl compound metabolic process	http://amigo.geneontology.org/amigo/term/GO:1901657	AKR7A2 AKR1B1 MTAP PUDP ATIC GUSB UPP1 APRT
0.060346458114332	8	100	2.71564147627417	Maintenance of protein location	http://amigo.geneontology.org/amigo/term/GO:0045185	LTBP1 SUN2 PSMD10 CAV1 SKP1 SRGN PML FBN1
0.0520733671091137	8	96	2.82879320445226	Retrograde vesicle-mediated transport, Golgi to endoplasmic reticulum	http://amigo.geneontology.org/amigo/term/GO:0006890	TMED2 NAPA COPE COPA ARF3 RAB6A COPG1 NSF
0.0446313941138089	8	93	2.92004459814426	Regulation of protein depolymerization	http://amigo.geneontology.org/amigo/term/GO:1901879	SH3BP1 MTPN PLEK SWAP70 RDX TMOD3 ADD3 CFL2
0.0427908192861228	8	92	2.95178421334148	Regulation of calcium ion transmembrane transporter activity	http://amigo.geneontology.org/amigo/term/GO:1901019	FKBP1A CASQ2 CAMK2D CALM3 S100A1 ATP2A1 PLCG2 PRKACA
0.0406263686989776	8	91	2.98422140249908	Positive regulation of protein binding	http://amigo.geneontology.org/amigo/term/GO:0032092	FKBP1A MAPRE1 STK3 PPP2CB CAV1 IDE RAN EPB41
0.026687975493801	8	83	3.27185720033032	Striated muscle hypertrophy	http://amigo.geneontology.org/amigo/term/GO:0014897	ROCK1 MTPN GLRX3 CSRP3 IL6ST CAMK2D TCAP MYH6
0.026687975493801	8	83	3.27185720033032	Negative regulation of protein polymerization	http://amigo.geneontology.org/amigo/term/GO:0032272	MAPRE1 MTPN STMN1 EML2 RDX TMOD3 ADD3 PRKCD
0.026687975493801	8	83	3.27185720033032	Regulation of release of sequestered calcium ion into cytosol	http://amigo.geneontology.org/amigo/term/GO:0051279	CYBA FKBP1A CASQ2 DIAPH1 CAMK2D CALM3 LYN PRKACA
0.0253376249543074	8	82	3.31175789789532	Polysaccharide biosynthetic process	http://amigo.geneontology.org/amigo/term/GO:0000271	GYS1 NFKB1 PTGES3 GBE1 AGL PGM2 PPP1CA AP2A1
0.0228361902808217	8	80	3.39455184534271	Cardiac muscle hypertrophy	http://amigo.geneontology.org/amigo/term/GO:0003300	ROCK1 MTPN GLRX3 CSRP3 IL6ST CAMK2D TCAP MYH6
0.0228361902808217	8	80	3.39455184534271	Cellular response to mechanical stimulus	http://amigo.geneontology.org/amigo/term/GO:0071260	GCLC CYBA CNN2 MTPN NFKB1 CASP1 DAG1 PTPN11
0.0215062639999745	8	79	3.43752085604325	Response to activity	http://amigo.geneontology.org/amigo/term/GO:0014823	GCLC GCLM CYBA GOT2 HADH HSPD1 ADSS1 FIS1
0.0200627494856268	8	78	3.48159163624893	Response to axon injury	http://amigo.geneontology.org/amigo/term/GO:0048678	GRN STK24 MAPK8IP3 MAP2K1 LAMB2 DAG1 LYN SCARF1
0.0156455493769514	8	74	3.66978577874887	Cellular aldehyde metabolic process	http://amigo.geneontology.org/amigo/term/GO:0006081	AKR7A2 HAGH GLO1 GOT2 ESD TKFC IDH2 ADH5
0.0156455493769514	8	74	3.66978577874887	Cellular response to ionizing radiation	http://amigo.geneontology.org/amigo/term/GO:0071479	CYBA XRCC5 DNM2 CRYAB TMEM109 IFI16 GRB2 EEF1D
0.0135149829119717	8	72	3.77172427260301	Positive regulation of DNA biosynthetic process	http://amigo.geneontology.org/amigo/term/GO:2000573	XRCC5 MAPK1 PTGES3 CCT4 HNRNPA1 CCT7 CCT8 CCT3
0.00873246878661078	8	66	4.1146082973851	Positive regulation of nucleocytoplasmic transport	http://amigo.geneontology.org/amigo/term/GO:0046824	IPO5 MAPK1 NUTF2 CPSF6 RAN DHX9 PRKCD HCLS1
0.00742843283047384	8	64	4.24318980667838	Peptidyl-proline modification	http://amigo.geneontology.org/amigo/term/GO:0018208	FKBP1A FKBP5 FKBP3 PIN4 FKBP15 PTPA ERO1A PPIL3
0.00682705102448516	8	63	4.31054202583201	Actin filament depolymerization	http://amigo.geneontology.org/amigo/term/GO:0030042	SH3BP1 MTPN PLEK SWAP70 RDX TMOD3 ADD3 CFL2
0.00573273256782462	8	61	4.4518712725806	Positive regulation of telomere maintenance	http://amigo.geneontology.org/amigo/term/GO:0032206	XRCC5 MAPK1 CCT4 HNRNPA1 CCT7 PML CCT8 CCT3
0.00434735049037244	8	58	4.68214047633477	Regulation of actin filament depolymerization	http://amigo.geneontology.org/amigo/term/GO:0030834	SH3BP1 MTPN PLEK SWAP70 RDX TMOD3 ADD3 CFL2
0.00357406182414975	8	56	4.84935977906101	Nuclear membrane reassembly	http://amigo.geneontology.org/amigo/term/GO:0031468	NSFL1C CHMP4B UBE2I PPP2R1A CHMP2A RAN LBR CHMP4A
0.000650532661743766	8	42	6.46581303874801	Sarcomere organization	http://amigo.geneontology.org/amigo/term/GO:0045214	TNNT1 PRKAR1A MYH3 CSRP3 CFL2 KRT8 TCAP MYH6
0.000144647365022812	8	33	8.2292165947702	Multivesicular body organization	http://amigo.geneontology.org/amigo/term/GO:0036257	VTA1 RAB27A TSG101 CHMP5 CHMP4B CHMP2A CHMP1B CHMP4A
0.0782082011449547	7	86	2.76300731597662	Regulation of translational initiation	http://amigo.geneontology.org/amigo/term/GO:0006446	EIF4B TMED2 EIF3B EIF2S1 PML IMPACT PPP1CA
0.0717898298628598	7	84	2.82879320445226	Nucleoside triphosphate biosynthetic process	http://amigo.geneontology.org/amigo/term/GO:0009142	ATP5F1D ATP5F1B ATP6V1A ATP5F1A ATP5MC3 NUDT2 NME1
0.0717898298628598	7	84	2.82879320445226	Amyloid precursor protein metabolic process	http://amigo.geneontology.org/amigo/term/GO:0042982	ROCK1 FKBP1A RTN4 RTN3 KLK6 PRNP LYN
0.0689639098925252	7	83	2.86287505028903	Regulation of muscle adaptation	http://amigo.geneontology.org/amigo/term/GO:0043502	ROCK1 TNNT1 MTPN GLRX3 IL6ST CAMK2D DAG1
0.0626841969645166	7	81	2.93356332313567	Membrane invagination	http://amigo.geneontology.org/amigo/term/GO:0010324	RHOA SH3BP1 SNX3 NCKAP1L CHMP2A RHOG CHMP4A
0.0626841969645166	7	81	2.93356332313567	Regulation of transcription initiation from RNA polymerase II promoter	http://amigo.geneontology.org/amigo/term/GO:0060260	PSMC6 NFKB1 CAND1 PSMC2 PSMC3 HMGB1 PSMC4
0.0594830450976301	7	80	2.97023286467487	Nucleoside monophosphate metabolic process	http://amigo.geneontology.org/amigo/term/GO:0009123	PAICS AMPD3 ATIC NUDT2 UPP1 ADSS1 APRT
0.0594830450976301	7	80	2.97023286467487	Synaptic vesicle recycling	http://amigo.geneontology.org/amigo/term/GO:0036465	ROCK1 DNM2 PPP3CB CALM3 AP2M1 SNCG CANX
0.0571378926013886	7	79	3.00783074903784	Cellular response to acid chemical	http://amigo.geneontology.org/amigo/term/GO:0071229	GCLC GCLM CYBA IPO5 LAMTOR3 LAMTOR5 CAPN2
0.0571378926013886	7	79	3.00783074903784	Exocytic process	http://amigo.geneontology.org/amigo/term/GO:0140029	STXBP2 NAPA RAB3D PLEK SNAPIN STX3 LYN
0.0550670250389803	7	78	3.04639268171781	Multicellular organismal water homeostasis	http://amigo.geneontology.org/amigo/term/GO:0050891	AKR1B1 PRKAR1A PRKAR2A STMN1 CYP4F2 BPIFA1 PRKACA
0.0526076694804715	7	77	3.08595622303882	Myeloid cell development	http://amigo.geneontology.org/amigo/term/GO:0061515	PAFAH1B1 NCKAP1L RPS6 TMOD3 FBN1 PTPN11 EVI2B
0.0526076694804715	7	77	3.08595622303882	Positive regulation of protein localization to cell periphery	http://amigo.geneontology.org/amigo/term/GO:1904377	NUMA1 EPB41 STX3 KIF5B PRNP RHOG RACK1
0.0442718897889924	7	74	3.21106255640526	Cell adhesion mediated by integrin	http://amigo.geneontology.org/amigo/term/GO:0033627	CRKL NCKAP1L SWAP70 FBN1 PTPN11 LYN ITGB3
0.0421721570073949	7	73	3.25504971471218	Ribonucleoside triphosphate biosynthetic process	http://amigo.geneontology.org/amigo/term/GO:0009201	ATP5F1D ATP5F1B ATP6V1A ATP5F1A ATP5MC3 NUDT2 NME1
0.0421721570073949	7	73	3.25504971471218	Positive regulation of reactive oxygen species metabolic process	http://amigo.geneontology.org/amigo/term/GO:2000379	CYBA RAB27A GNAI2 NQO2 CBR1 PRKCD GRB2
0.0376127343306555	7	71	3.34674125597168	Cellular response to amino acid stimulus	http://amigo.geneontology.org/amigo/term/GO:0071230	GCLC GCLM CYBA IPO5 LAMTOR3 LAMTOR5 CAPN2
0.0312410858364942	7	68	3.49439160549984	Purine nucleoside triphosphate biosynthetic process	http://amigo.geneontology.org/amigo/term/GO:0009145	ATP5F1D ATP5F1B ATP6V1A ATP5F1A ATP5MC3 NUDT2 NME1
0.0294673609075338	7	67	3.54654670408939	Purine ribonucleoside triphosphate biosynthetic process	http://amigo.geneontology.org/amigo/term/GO:0009206	ATP5F1D ATP5F1B ATP6V1A ATP5F1A ATP5MC3 NUDT2 NME1
0.0294673609075338	7	67	3.54654670408939	Regulation of microtubule polymerization	http://amigo.geneontology.org/amigo/term/GO:0031113	MAPRE1 STMN1 EML2 CLIP1 NUMA1 RPS3 DCTN1
0.0294673609075338	7	67	3.54654670408939	Synaptic vesicle endocytosis	http://amigo.geneontology.org/amigo/term/GO:0048488	ROCK1 DNM2 PPP3CB CALM3 AP2M1 SNCG CANX
0.0294673609075338	7	67	3.54654670408939	Presynaptic endocytosis	http://amigo.geneontology.org/amigo/term/GO:0140238	ROCK1 DNM2 PPP3CB CALM3 AP2M1 SNCG CANX
0.0277554758869516	7	66	3.60028226021196	Cytoplasmic microtubule organization	http://amigo.geneontology.org/amigo/term/GO:0031122	PAFAH1B1 SLK RHOA CLIP1 NUMA1 DYNC1H1 DCTN1
0.0277554758869516	7	66	3.60028226021196	Lymphocyte costimulation	http://amigo.geneontology.org/amigo/term/GO:0031294	CSK CAV1 ICOSLG GRB2 PTPN11 PAK2 LYN
0.0260718102756631	7	65	3.65567121806138	Positive regulation of neuron apoptotic process	http://amigo.geneontology.org/amigo/term/GO:0043525	GRN RHOA CTSZ NQO2 AIFM1 PRNP FIS1
0.0260718102756631	7	65	3.65567121806138	Regulation of protein import	http://amigo.geneontology.org/amigo/term/GO:1904589	IPO5 MAPK1 NUTF2 UFM1 RAN PRKCD HCLS1
0.0241928458533634	7	64	3.71279108084359	T cell costimulation	http://amigo.geneontology.org/amigo/term/GO:0031295	CSK CAV1 ICOSLG GRB2 PTPN11 PAK2 LYN
0.0215062639999745	7	62	3.83255853506435	Regulation of protein import into nucleus	http://amigo.geneontology.org/amigo/term/GO:0042306	IPO5 MAPK1 NUTF2 UFM1 RAN PRKCD HCLS1
0.0198792647887068	7	61	3.89538736350802	Glycosaminoglycan catabolic process	http://amigo.geneontology.org/amigo/term/GO:0006027	PGLYRP1 DCN NAGLU GNS GUSB BGN PRELP
0.018519620319001	7	60	3.96031048623316	Ribonucleoside monophosphate metabolic process	http://amigo.geneontology.org/amigo/term/GO:0009161	PAICS AMPD3 ATIC NUDT2 UPP1 ADSS1 APRT
0.018519620319001	7	60	3.96031048623316	Monosaccharide catabolic process	http://amigo.geneontology.org/amigo/term/GO:0046365	PFKL TKFC PFKM NUDT5 PGM2 RPE PKLR
0.0160000246435251	7	58	4.09687291679292	Neuron projection regeneration	http://amigo.geneontology.org/amigo/term/GO:0031102	GRN STK24 MAPK8IP3 MAP2K1 LAMB2 DAG1 SCARF1
0.0160000246435251	7	58	4.09687291679292	Positive regulation of DNA binding	http://amigo.geneontology.org/amigo/term/GO:0043388	PLAUR LAMTOR5 CALM3 HMGB2 H1-0 HMGB1 NME1
0.0104829163635108	7	53	4.48337036177339	Mitotic metaphase plate congression	http://amigo.geneontology.org/amigo/term/GO:0007080	CUL3 CHMP5 NUDC CHMP4B CHMP2A CHMP1B CHMP4A
0.0104829163635108	7	53	4.48337036177339	Mitotic nuclear membrane reassembly	http://amigo.geneontology.org/amigo/term/GO:0007084	CHMP4B UBE2I PPP2R1A CHMP2A RAN LBR CHMP4A
0.0104829163635108	7	53	4.48337036177339	Mitotic nuclear membrane organization	http://amigo.geneontology.org/amigo/term/GO:0101024	CHMP4B UBE2I PPP2R1A CHMP2A RAN LBR CHMP4A
0.00956419507475605	7	52	4.56958902257672	Response to interleukin-12	http://amigo.geneontology.org/amigo/term/GO:0070671	CNN2 MTAP PITPNA PAK2 BOLA2 CD47 MIF
0.0088115932112657	7	51	4.65918880733313	Cellular response to interleukin-12	http://amigo.geneontology.org/amigo/term/GO:0071349	CNN2 MTAP PITPNA PAK2 BOLA2 CD47 MIF
0.00801480918762941	7	50	4.75237258347979	Axon regeneration	http://amigo.geneontology.org/amigo/term/GO:0031103	GRN STK24 MAPK8IP3 MAP2K1 LAMB2 DAG1 SCARF1
0.00655170776836049	7	48	4.95038810779145	Regulation of spindle organization	http://amigo.geneontology.org/amigo/term/GO:0090224	CHMP5 CHMP4B CHMP2A NUMA1 DYNC1H1 DCTN1 CHMP1B
0.00589480412117383	7	47	5.0557155143402	Protein peptidyl-prolyl isomerization	http://amigo.geneontology.org/amigo/term/GO:0000413	FKBP1A FKBP5 FKBP3 PIN4 FKBP15 PTPA PPIL3
0.00427418818344373	7	44	5.40042339031794	Nucleoside monophosphate biosynthetic process	http://amigo.geneontology.org/amigo/term/GO:0009124	PAICS AMPD3 ATIC NUDT2 UPP1 ADSS1 APRT
0.00427418818344373	7	44	5.40042339031794	Regulation of mitotic spindle organization	http://amigo.geneontology.org/amigo/term/GO:0060236	CHMP5 CHMP4B CHMP2A NUMA1 DYNC1H1 DCTN1 CHMP1B
0.00382098159830159	7	43	5.52601463195324	Cell redox homeostasis	http://amigo.geneontology.org/amigo/term/GO:0045454	GCLC CYBA DLD NCF4 NCF2 ERO1A TXNRD1
0.00336621415529067	7	42	5.65758640890451	Virion assembly	http://amigo.geneontology.org/amigo/term/GO:0019068	VTA1 TSG101 CHMP5 CHMP4B CHMP2A CHMP1B CHMP4A
0.00255029763359938	7	40	5.94046572934974	Multivesicular body sorting pathway	http://amigo.geneontology.org/amigo/term/GO:0071985	VTA1 RAB27A CHMP5 CHMP4B CHMP2A CHMP1B CHMP4A
0.00255029763359938	7	40	5.94046572934974	Positive regulation of telomere maintenance via telomere lengthening	http://amigo.geneontology.org/amigo/term/GO:1904358	XRCC5 MAPK1 CCT4 HNRNPA1 CCT7 CCT8 CCT3
0.00172786116910976	7	37	6.42212511281053	Cytoplasmic translational initiation	http://amigo.geneontology.org/amigo/term/GO:0002183	EIF4B EIF3B EIF3A DENR EIF4A1 EIF3F EIF3CL
0.00172786116910976	7	37	6.42212511281053	Positive regulation of telomere maintenance via telomerase	http://amigo.geneontology.org/amigo/term/GO:0032212	XRCC5 MAPK1 CCT4 HNRNPA1 CCT7 CCT8 CCT3
0.00130219941593603	7	35	6.78910369068541	Ribonucleoside monophosphate biosynthetic process	http://amigo.geneontology.org/amigo/term/GO:0009156	PAICS AMPD3 ATIC NUDT2 UPP1 ADSS1 APRT
0.000795722743235979	7	32	7.42558216168717	Multivesicular body assembly	http://amigo.geneontology.org/amigo/term/GO:0036258	VTA1 TSG101 CHMP5 CHMP4B CHMP2A CHMP1B CHMP4A
0.00037113642391801	7	28	8.48637961335677	Polysaccharide catabolic process	http://amigo.geneontology.org/amigo/term/GO:0000272	PYGB CHIT1 PFKM AGL PGM2 PPP1CA HMGB1
0.00037113642391801	7	28	8.48637961335677	Viral budding	http://amigo.geneontology.org/amigo/term/GO:0046755	VTA1 TSG101 CHMP5 CHMP4B CHMP2A CHMP1B CHMP4A
0.0803689995465901	6	67	3.03989717493377	Amyloid precursor protein catabolic process	http://amigo.geneontology.org/amigo/term/GO:0042987	ROCK1 FKBP1A RTN4 RTN3 PRNP LYN
0.0760753811684192	6	66	3.08595622303882	Sterol biosynthetic process	http://amigo.geneontology.org/amigo/term/GO:0016126	ERLIN1 ACAT2 RAN LBR ACAA2 CES1
0.0760753811684192	6	66	3.08595622303882	Polyol biosynthetic process	http://amigo.geneontology.org/amigo/term/GO:0046173	AKR1B1 SPTLC1 PLEK QDPR PGP PLCG2
0.0760753811684192	6	66	3.08595622303882	Vesicle docking	http://amigo.geneontology.org/amigo/term/GO:0048278	STXBP2 RAB3D PLEK USO1 STX3 NSF
0.0760753811684192	6	66	3.08595622303882	Regulation of focal adhesion assembly	http://amigo.geneontology.org/amigo/term/GO:0051893	SLK RHOA ROCK1 PPM1F PTPN11 RCC2
0.0760753811684192	6	66	3.08595622303882	Regulation of cell-substrate junction assembly	http://amigo.geneontology.org/amigo/term/GO:0090109	SLK RHOA ROCK1 PPM1F PTPN11 RCC2
0.0720482977086529	6	65	3.13343247262404	Regulation of cellular response to insulin stimulus	http://amigo.geneontology.org/amigo/term/GO:1900076	GNAI2 USO1 PRKCD TRIM72 PTPN11 MYO1C
0.0691719899293315	6	64	3.18239235500879	Apoptotic cell clearance	http://amigo.geneontology.org/amigo/term/GO:0043277	RAB14 RHOG HMGB1 TGM2 TXNDC5 ITGB3
0.0619541323737093	6	62	3.2850501729123	Regulation of macrophage activation	http://amigo.geneontology.org/amigo/term/GO:0043030	GRN KARS1 CTSC HSPD1 VSIG4 MIF
0.0527582695281454	6	59	3.45208662238241	Cholesterol biosynthetic process	http://amigo.geneontology.org/amigo/term/GO:0006695	ERLIN1 ACAT2 RAN LBR ACAA2 CES1
0.0527582695281454	6	59	3.45208662238241	Aspartate family amino acid metabolic process	http://amigo.geneontology.org/amigo/term/GO:0009066	DLD MTAP SMS GOT2 ADSS1 MSRA
0.0527582695281454	6	59	3.45208662238241	Secondary alcohol biosynthetic process	http://amigo.geneontology.org/amigo/term/GO:1902653	ERLIN1 ACAT2 RAN LBR ACAA2 CES1
0.0465927470685979	6	57	3.5732124687818	Negative regulation of peptidyl-tyrosine phosphorylation	http://amigo.geneontology.org/amigo/term/GO:0050732	MVP TSG101 PPP2R1A CAV1 PRKCD RACK1
0.0434911510865529	6	56	3.63701983429576	ATP biosynthetic process	http://amigo.geneontology.org/amigo/term/GO:0006754	ATP5F1D ATP5F1B ATP6V1A ATP5F1A ATP5MC3 NUDT2
0.0406833021725149	6	55	3.70314746764659	Viral release from host cell	http://amigo.geneontology.org/amigo/term/GO:0019076	TSG101 CHMP4B VAPA CHMP2A PML DDB1
0.0406833021725149	6	55	3.70314746764659	Exit from host	http://amigo.geneontology.org/amigo/term/GO:0035890	TSG101 CHMP4B VAPA CHMP2A PML DDB1
0.0406833021725149	6	55	3.70314746764659	Exit from host cell	http://amigo.geneontology.org/amigo/term/GO:0035891	TSG101 CHMP4B VAPA CHMP2A PML DDB1
0.0406833021725149	6	55	3.70314746764659	Negative regulation of lipid localization	http://amigo.geneontology.org/amigo/term/GO:1905953	NFKB1 PTPN11 CYP4F2 FIS1 ITGB3 CES1
0.0379867542684181	6	54	3.77172427260301	Activated T cell proliferation	http://amigo.geneontology.org/amigo/term/GO:0050798	CLC PRKAR1A RPS3 ICOSLG PRNP HMGB1
0.035712272887658	6	53	3.84288888152005	Transcription preinitiation complex assembly	http://amigo.geneontology.org/amigo/term/GO:0070897	PSMC6 CAND1 PSMC2 PSMC3 HMGB1 PSMC4
0.035712272887658	6	53	3.84288888152005	Regulation of amyloid precursor protein catabolic process	http://amigo.geneontology.org/amigo/term/GO:1902991	ROCK1 FKBP1A RTN4 RTN3 PRNP LYN
0.0306142734255152	6	51	3.99359040628554	Glycogen biosynthetic process	http://amigo.geneontology.org/amigo/term/GO:0005978	GYS1 PTGES3 GBE1 AGL PGM2 PPP1CA
0.0306142734255152	6	51	3.99359040628554	Glucan biosynthetic process	http://amigo.geneontology.org/amigo/term/GO:0009250	GYS1 PTGES3 GBE1 AGL PGM2 PPP1CA
0.0288466680119221	6	50	4.07346221441125	Regulation of activated T cell proliferation	http://amigo.geneontology.org/amigo/term/GO:0046006	CLC PRKAR1A RPS3 ICOSLG PRNP HMGB1
0.0288466680119221	6	50	4.07346221441125	Regulation of viral release from host cell	http://amigo.geneontology.org/amigo/term/GO:1902186	TSG101 CHMP4B VAPA CHMP2A PML DDB1
0.0265761876578609	6	49	4.15659409633801	Interleukin-12-mediated signaling pathway	http://amigo.geneontology.org/amigo/term/GO:0035722	CNN2 MTAP PITPNA PAK2 BOLA2 MIF
0.0229478720130471	6	47	4.33347044086303	Cortical actin cytoskeleton organization	http://amigo.geneontology.org/amigo/term/GO:0030866	EHD2 ROCK1 PLEK NCKAP1L EPB41 FMNL1
0.021141861345369	6	46	4.42767632001223	Purine nucleoside monophosphate metabolic process	http://amigo.geneontology.org/amigo/term/GO:0009126	PAICS AMPD3 ATIC NUDT2 ADSS1 APRT
0.0176017223506772	6	44	4.62893433455824	Positive regulation of protein import	http://amigo.geneontology.org/amigo/term/GO:1904591	IPO5 MAPK1 NUTF2 RAN PRKCD HCLS1
0.0160373272328317	6	43	4.73658397024564	Purine ribonucleoside monophosphate metabolic process	http://amigo.geneontology.org/amigo/term/GO:0009167	PAICS AMPD3 ATIC NUDT2 ADSS1 APRT
0.0160373272328317	6	43	4.73658397024564	Response to interleukin-7	http://amigo.geneontology.org/amigo/term/GO:0098760	CRKL ATIC HDGF HSPD1 H3C13 HMGB1
0.0160373272328317	6	43	4.73658397024564	Cellular response to interleukin-7	http://amigo.geneontology.org/amigo/term/GO:0098761	CRKL ATIC HDGF HSPD1 H3C13 HMGB1
0.0145164429760519	6	42	4.84935977906101	Protein kinase A signaling	http://amigo.geneontology.org/amigo/term/GO:0010737	PRKAR1A PRKAR2A AKAP12 RDX MIF PRKACA
0.0145164429760519	6	42	4.84935977906101	Positive regulation of protein import into nucleus	http://amigo.geneontology.org/amigo/term/GO:0042307	IPO5 MAPK1 NUTF2 RAN PRKCD HCLS1
0.0132508250982434	6	41	4.96763684684298	Muscle filament sliding	http://amigo.geneontology.org/amigo/term/GO:0030049	TNNT1 MYH3 MYH8 TCAP MYH6 MYH4
0.0132508250982434	6	41	4.96763684684298	Actin-myosin filament sliding	http://amigo.geneontology.org/amigo/term/GO:0033275	TNNT1 MYH3 MYH8 TCAP MYH6 MYH4
0.0106421610146246	6	39	5.22238745437339	Intra-Golgi vesicle-mediated transport	http://amigo.geneontology.org/amigo/term/GO:0006891	NAPA COPE COPA RAB6A COPG1 NSF
0.0106421610146246	6	39	5.22238745437339	Cytokinetic process	http://amigo.geneontology.org/amigo/term/GO:0032506	RHOA CHMP5 CHMP4B CHMP2A CHMP1B CHMP4A
0.00956419507475605	6	38	5.35981870317269	RNA polymerase II preinitiation complex assembly	http://amigo.geneontology.org/amigo/term/GO:0051123	PSMC6 CAND1 PSMC2 PSMC3 HMGB1 PSMC4
0.00769576072606607	6	36	5.65758640890451	NADP metabolic process	http://amigo.geneontology.org/amigo/term/GO:0006739	NADK H6PD KCNAB2 PGM2 IDH2 RPE
0.00589714424648666	6	34	5.99038560942831	Endosome transport via multivesicular body sorting pathway	http://amigo.geneontology.org/amigo/term/GO:0032509	VTA1 CHMP5 CHMP4B CHMP2A CHMP1B CHMP4A
0.00589714424648666	6	34	5.99038560942831	Regulation of spindle assembly	http://amigo.geneontology.org/amigo/term/GO:0090169	CHMP5 CHMP4B CHMP2A NUMA1 DYNC1H1 CHMP1B
0.00397104951139108	6	31	6.57010034582459	Protein localization to chromosome, telomeric region	http://amigo.geneontology.org/amigo/term/GO:0070198	XRCC5 CCT4 CCT7 PML CCT8 CCT3
0.00247079990465555	6	28	7.27403966859151	Response to angiotensin	http://amigo.geneontology.org/amigo/term/GO:1990776	CYBA ROCK1 CAV1 NFKB1 PRKCD PTPN11
0.00209531736376758	6	27	7.54344854520602	Late endosome to vacuole transport	http://amigo.geneontology.org/amigo/term/GO:0045324	VTA1 CHMP5 CHMP4B CHMP2A CHMP1B CHMP4A
0.00172786116910976	6	26	7.83358118156009	Endoplasmic reticulum calcium ion homeostasis	http://amigo.geneontology.org/amigo/term/GO:0032469	PML TMCO1 CAMK2D ATP2A1 TGM2 FIS1
0.00172786116910976	6	26	7.83358118156009	Cellular polysaccharide catabolic process	http://amigo.geneontology.org/amigo/term/GO:0044247	PYGB PFKM AGL PGM2 PPP1CA HMGB1
0.00145173388758498	6	25	8.1469244288225	Glucan catabolic process	http://amigo.geneontology.org/amigo/term/GO:0009251	PYGB PFKM AGL PGM2 PPP1CA HMGB1
0.00145173388758498	6	25	8.1469244288225	Cellular response to angiotensin	http://amigo.geneontology.org/amigo/term/GO:1904385	CYBA ROCK1 CAV1 NFKB1 PRKCD PTPN11
0.00119635053612224	6	24	8.48637961335677	Glycogen catabolic process	http://amigo.geneontology.org/amigo/term/GO:0005980	PYGB PFKM AGL PGM2 PPP1CA HMGB1
0.00119635053612224	6	24	8.48637961335677	Mitotic cytokinetic process	http://amigo.geneontology.org/amigo/term/GO:1902410	RHOA CHMP5 CHMP4B CHMP2A CHMP1B CHMP4A
0.000976158500100413	6	23	8.85535264002445	Nucleotide-excision repair, DNA damage recognition	http://amigo.geneontology.org/amigo/term/GO:0000715	COPS4 COPS7B COPS2 DDB1 COPS6 GPS1
0.000976158500100413	6	23	8.85535264002445	Purine nucleoside monophosphate biosynthetic process	http://amigo.geneontology.org/amigo/term/GO:0009127	PAICS AMPD3 ATIC NUDT2 ADSS1 APRT
0.000603253055225031	6	21	9.69871955812202	Purine ribonucleoside monophosphate biosynthetic process	http://amigo.geneontology.org/amigo/term/GO:0009168	PAICS AMPD3 ATIC NUDT2 ADSS1 APRT
0.000603253055225031	6	21	9.69871955812202	Viral translation	http://amigo.geneontology.org/amigo/term/GO:0019081	EIF3B EIF3A DHX9 SSB DENR EIF3F
6.44499664676058e-05	6	14	14.548079337183	Regulation of RNA polymerase II transcription preinitiation complex assembly	http://amigo.geneontology.org/amigo/term/GO:0045898	PSMC6 CAND1 PSMC2 PSMC3 HMGB1 PSMC4
0.0814337364086076	5	49	3.46382841361501	Prostanoid metabolic process	http://amigo.geneontology.org/amigo/term/GO:0006692	AKR1B1 PTGES3 GSTM1 CBR1 MIF
0.0814337364086076	5	49	3.46382841361501	Prostaglandin metabolic process	http://amigo.geneontology.org/amigo/term/GO:0006693	AKR1B1 PTGES3 GSTM1 CBR1 MIF
0.0766589078546596	5	48	3.53599150556532	Positive regulation of microtubule polymerization or depolymerization	http://amigo.geneontology.org/amigo/term/GO:0031112	MAPRE1 CLIP1 NUMA1 RPS3 DCTN1
0.0766589078546596	5	48	3.53599150556532	Regulation of alcohol biosynthetic process	http://amigo.geneontology.org/amigo/term/GO:1902930	H6PD ERLIN1 NFKB1 PLEK RAN
0.0719423398176386	5	47	3.61122536738586	Negative regulation of epidermal growth factor receptor signaling pathway	http://amigo.geneontology.org/amigo/term/GO:0042059	MVP TSG101 EPS15 EPS15L1 GRB2
0.0719423398176386	5	47	3.61122536738586	Synaptic vesicle transport	http://amigo.geneontology.org/amigo/term/GO:0048489	RAB27A DNM2 DPYSL2 SNAPIN KIF5B
0.0685298257291575	5	46	3.68973026667686	Skeletal muscle contraction	http://amigo.geneontology.org/amigo/term/GO:0003009	TNNT1 MYH3 MYH8 TCAP ATP2A1
0.0685298257291575	5	46	3.68973026667686	Regulation of centrosome duplication	http://amigo.geneontology.org/amigo/term/GO:0010824	XPO1 CHMP5 CHMP4B CHMP2A CHMP1B
0.0592623318277059	5	44	3.85744527879853	Positive regulation of microtubule polymerization	http://amigo.geneontology.org/amigo/term/GO:0031116	MAPRE1 CLIP1 NUMA1 RPS3 DCTN1
0.0592623318277059	5	44	3.85744527879853	Vesicle-mediated transport between endosomal compartments	http://amigo.geneontology.org/amigo/term/GO:0098927	MAPK1 EEA1 SNX3 RDX MAP2K1
0.0592623318277059	5	44	3.85744527879853	Toxin transport	http://amigo.geneontology.org/amigo/term/GO:1901998	CCT4 CCT7 CASP1 CCT8 CCT3
0.0555522711812307	5	43	3.94715330853803	Renal water homeostasis	http://amigo.geneontology.org/amigo/term/GO:0003091	AKR1B1 PRKAR1A PRKAR2A CYP4F2 PRKACA
0.0555522711812307	5	43	3.94715330853803	Viral protein processing	http://amigo.geneontology.org/amigo/term/GO:0019082	ST6GAL1 GANAB UBE2I MGAT1 CANX
0.0555522711812307	5	43	3.94715330853803	Sarcoplasmic reticulum calcium ion transport	http://amigo.geneontology.org/amigo/term/GO:0070296	CASQ2 CAMK2D CALM3 ATP2A1 PRKACA
0.0526076694804715	5	42	4.04113314921751	Regulation of membrane depolarization	http://amigo.geneontology.org/amigo/term/GO:0003254	GCLC DCN GCLM CAMK2D RACK1
0.0526076694804715	5	42	4.04113314921751	Amino sugar metabolic process	http://amigo.geneontology.org/amigo/term/GO:0006040	ST6GAL1 GNPDA1 MGAT1 CHI3L1 CHIT1
0.0526076694804715	5	42	4.04113314921751	Granulocyte differentiation	http://amigo.geneontology.org/amigo/term/GO:0030851	PML LBR FASN HCLS1 EVI2B
0.0485928110223565	5	41	4.13969737236915	Superoxide anion generation	http://amigo.geneontology.org/amigo/term/GO:0042554	CYBA NCF4 GNAI2 NCF2 PRKCD
0.0485928110223565	5	41	4.13969737236915	Early endosome to late endosome transport	http://amigo.geneontology.org/amigo/term/GO:0045022	MAPK1 EEA1 SNX3 RDX MAP2K1
0.0485928110223565	5	41	4.13969737236915	Quinone metabolic process	http://amigo.geneontology.org/amigo/term/GO:1901661	AKR7A2 AKR1B1 NQO2 CBR1 CYP4F2
0.0445351571023356	5	40	4.24318980667838	Sulfur amino acid metabolic process	http://amigo.geneontology.org/amigo/term/GO:0000096	GCLC GCLM MTAP SMS MSRA
0.0348074820472013	5	37	4.58723222343609	Cell communication by electrical coupling	http://amigo.geneontology.org/amigo/term/GO:0010644	CAV1 CASQ2 CAMK2D CALM3 PRKACA
0.0348074820472013	5	37	4.58723222343609	Cellular metabolic compound salvage	http://amigo.geneontology.org/amigo/term/GO:0043094	MTAP PUDP AMPD3 UPP1 APRT
0.031488596692734	5	36	4.71465534075376	Low-density lipoprotein particle clearance	http://amigo.geneontology.org/amigo/term/GO:0034383	CSK EHD1 CLTA AP2M1 AP2A1
0.031488596692734	5	36	4.71465534075376	Positive regulation of DNA-templated transcription, initiation	http://amigo.geneontology.org/amigo/term/GO:2000144	PSMC6 CAND1 PSMC2 PSMC3 PSMC4
0.0290579227556195	5	35	4.84935977906101	Positive regulation of viral life cycle	http://amigo.geneontology.org/amigo/term/GO:1903902	TSG101 CHMP4B VAPA CHMP2A DDB1
0.0192671077589297	5	31	5.4750836215205	Negative regulation of lipid transport	http://amigo.geneontology.org/amigo/term/GO:0032369	NFKB1 PTPN11 CYP4F2 FIS1 ITGB3
0.0192671077589297	5	31	5.4750836215205	Positive regulation of toll-like receptor signaling pathway	http://amigo.geneontology.org/amigo/term/GO:0034123	CYBA IFI35 CAV1 RTN4 HMGB1
0.0171495518560738	5	30	5.65758640890451	Regulation of defense response to virus by virus	http://amigo.geneontology.org/amigo/term/GO:0050690	DOCK2 AP2M1 PAK2 AP1S2 AP2A1
0.0171495518560738	5	30	5.65758640890451	Positive regulation of transcription initiation from RNA polymerase II promoter	http://amigo.geneontology.org/amigo/term/GO:0060261	PSMC6 CAND1 PSMC2 PSMC3 PSMC4
0.0134389917767175	5	28	6.06169972382626	Energy coupled proton transport, down electrochemical gradient	http://amigo.geneontology.org/amigo/term/GO:0015985	ATP5F1D ATP5F1B ATP6V1A ATP5F1A ATP5MC3
0.0134389917767175	5	28	6.06169972382626	ATP synthesis coupled proton transport	http://amigo.geneontology.org/amigo/term/GO:0015986	ATP5F1D ATP5F1B ATP6V1A ATP5F1A ATP5MC3
0.0134389917767175	5	28	6.06169972382626	Regulation of ryanodine-sensitive calcium-release channel activity	http://amigo.geneontology.org/amigo/term/GO:0060314	FKBP1A CASQ2 CAMK2D CALM3 PRKACA
0.0117616708232004	5	27	6.28620712100501	Regulation of the force of heart contraction	http://amigo.geneontology.org/amigo/term/GO:0002026	CAV1 GLRX3 CSRP3 CAMK2D MYH6
0.0117616708232004	5	27	6.28620712100501	Regulation of translation in response to stress	http://amigo.geneontology.org/amigo/term/GO:0043555	TMED2 EIF2S1 PML IMPACT PPP1CA
0.00768878983859115	5	24	7.07198301113064	Mitochondrial depolarization	http://amigo.geneontology.org/amigo/term/GO:0051882	GCLC DCN GCLM CASP1 RACK1
0.0065067105827987	5	23	7.37946053335371	Viral budding via host ESCRT complex	http://amigo.geneontology.org/amigo/term/GO:0039702	TSG101 CHMP4B CHMP2A CHMP1B CHMP4A
0.00454699502638589	5	21	8.08226629843502	Plasma membrane tubulation	http://amigo.geneontology.org/amigo/term/GO:0097320	EHD2 DNM2 ASAP1 CAVIN2 CHMP4A
0.00301508506980232	5	19	8.93303117195449	Macrophage activation involved in immune response	http://amigo.geneontology.org/amigo/term/GO:0002281	GRN IFI35 NMI DYSF HMGB1
0.00244109485787943	5	18	9.42931068150752	Regulation of translational initiation in response to stress	http://amigo.geneontology.org/amigo/term/GO:0043558	TMED2 EIF2S1 PML IMPACT PPP1CA
0.00244109485787943	5	18	9.42931068150752	Midbody abscission	http://amigo.geneontology.org/amigo/term/GO:0061952	CHMP5 CHMP4B CHMP2A CHMP1B CHMP4A
0.00150473078569943	5	16	10.607974516696	Positive regulation of viral release from host cell	http://amigo.geneontology.org/amigo/term/GO:1902188	TSG101 CHMP4B VAPA CHMP2A DDB1
0.00114709248263394	5	15	11.315172817809	Regulation of protein localization to chromosome, telomeric region	http://amigo.geneontology.org/amigo/term/GO:1904814	CCT4 CCT7 PML CCT8 CCT3
0.000595368245467222	5	13	13.0559686359335	Positive regulation of protein localization to chromosome, telomeric region	http://amigo.geneontology.org/amigo/term/GO:1904816	CCT4 CCT7 PML CCT8 CCT3
0.000414704782619196	5	12	14.1439660222613	IRES-dependent viral translational initiation	http://amigo.geneontology.org/amigo/term/GO:0075522	EIF3B EIF3A SSB DENR EIF3F
0.000275315480109448	5	11	15.4297811151941	Positive regulation of RNA polymerase II transcription preinitiation complex assembly	http://amigo.geneontology.org/amigo/term/GO:0045899	PSMC6 CAND1 PSMC2 PSMC3 PSMC4
0.000174105521433409	5	10	16.9727592267135	Protein deneddylation	http://amigo.geneontology.org/amigo/term/GO:0000338	COPS4 COPS7B COPS2 COPS6 GPS1
0.0803689995465901	4	32	4.24318980667838	MiRNA metabolic process	http://amigo.geneontology.org/amigo/term/GO:0010586	DDX17 NFKB1 RAN SND1
0.0803689995465901	4	32	4.24318980667838	Regulation of neuron projection regeneration	http://amigo.geneontology.org/amigo/term/GO:0070570	GRN STK24 MAP2K1 SCARF1
0.0803689995465901	4	32	4.24318980667838	Cellular response to gamma radiation	http://amigo.geneontology.org/amigo/term/GO:0071480	CYBA XRCC5 CRYAB TMEM109
0.0803689995465901	4	32	4.24318980667838	Glycosyl compound biosynthetic process	http://amigo.geneontology.org/amigo/term/GO:1901659	MTAP PUDP UPP1 APRT
0.0739697692306424	4	31	4.3800668972164	Establishment of mitotic spindle orientation	http://amigo.geneontology.org/amigo/term/GO:0000132	PAFAH1B1 NSFL1C NUMA1 DCTN1
0.0686979849499551	4	30	4.52606912712361	Positive regulation of peptidyl-threonine phosphorylation	http://amigo.geneontology.org/amigo/term/GO:0010800	UBE2K MAPK1 CHI3L1 CALM3
0.0686979849499551	4	30	4.52606912712361	Regulation of release of sequestered calcium ion into cytosol by sarcoplasmic reticulum	http://amigo.geneontology.org/amigo/term/GO:0010880	CASQ2 CAMK2D CALM3 PRKACA
0.0686979849499551	4	30	4.52606912712361	Regulation of homotypic cell-cell adhesion	http://amigo.geneontology.org/amigo/term/GO:0034110	PLAUR RDX PRKCD LYN
0.0626841969645166	4	29	4.68214047633477	Positive regulation of muscle hypertrophy	http://amigo.geneontology.org/amigo/term/GO:0014742	ROCK1 MTPN IL6ST CAMK2D
0.0626841969645166	4	29	4.68214047633477	Cell communication by electrical coupling involved in cardiac conduction	http://amigo.geneontology.org/amigo/term/GO:0086064	CAV1 CAMK2D CALM3 PRKACA
0.0626841969645166	4	29	4.68214047633477	Neurotransmitter receptor internalization	http://amigo.geneontology.org/amigo/term/GO:0099590	DNM2 EPS15 AP2M1 ITGB3
0.0571378926013886	4	28	4.84935977906101	Nucleoside biosynthetic process	http://amigo.geneontology.org/amigo/term/GO:0009163	MTAP PUDP UPP1 APRT
0.0571378926013886	4	28	4.84935977906101	Positive regulation of cardiac muscle hypertrophy	http://amigo.geneontology.org/amigo/term/GO:0010613	ROCK1 MTPN IL6ST CAMK2D
0.0571378926013886	4	28	4.84935977906101	Regulation of cardiac muscle contraction by calcium ion signaling	http://amigo.geneontology.org/amigo/term/GO:0010882	CASQ2 CAMK2D CALM3 PRKACA
0.0571378926013886	4	28	4.84935977906101	Nucleobase-containing small molecule biosynthetic process	http://amigo.geneontology.org/amigo/term/GO:0034404	MTAP PUDP UPP1 APRT
0.0571378926013886	4	28	4.84935977906101	Polyol catabolic process	http://amigo.geneontology.org/amigo/term/GO:0046174	SORD TKFC BPNT1 NUDT3
0.0571378926013886	4	28	4.84935977906101	Regulation of axon regeneration	http://amigo.geneontology.org/amigo/term/GO:0048679	GRN STK24 MAP2K1 SCARF1
0.0571378926013886	4	28	4.84935977906101	Regulation of cytoplasmic transport	http://amigo.geneontology.org/amigo/term/GO:1903649	MAPK1 SNX3 RDX MAP2K1
0.0527582695281454	4	27	5.02896569680401	Regulation of systemic arterial blood pressure by renin-angiotensin	http://amigo.geneontology.org/amigo/term/GO:0003081	CYBA RHOA CTSZ CES1
0.0527582695281454	4	27	5.02896569680401	Regulation of protein kinase A signaling	http://amigo.geneontology.org/amigo/term/GO:0010738	PRKAR1A PRKAR2A AKAP12 MIF
0.0527582695281454	4	27	5.02896569680401	Response to thyroid hormone	http://amigo.geneontology.org/amigo/term/GO:0097066	GCLC GCLM AKR1B1 RDX
0.0527582695281454	4	27	5.02896569680401	Regulation of mitotic spindle assembly	http://amigo.geneontology.org/amigo/term/GO:1901673	CHMP5 CHMP4B CHMP2A CHMP1B
0.0527582695281454	4	27	5.02896569680401	Regulation of synaptic vesicle recycling	http://amigo.geneontology.org/amigo/term/GO:1903421	ROCK1 PPP3CB CALM3 AP2M1
0.0477426321925419	4	26	5.22238745437339	Regulation of nuclease activity	http://amigo.geneontology.org/amigo/term/GO:0032069	RPS3 PRKCD HMGB2 HMGB1
0.0477426321925419	4	26	5.22238745437339	Nucleus localization	http://amigo.geneontology.org/amigo/term/GO:0051647	PAFAH1B1 SUN2 DYNC1H1 DCTN1
0.0427908192861228	4	25	5.43128295254833	Apoptotic DNA fragmentation	http://amigo.geneontology.org/amigo/term/GO:0006309	AIFM1 HMGB2 H1-0 HMGB1
0.0427908192861228	4	25	5.43128295254833	Alditol metabolic process	http://amigo.geneontology.org/amigo/term/GO:0019400	AKR1B1 SORD TKFC PGP
0.0427908192861228	4	25	5.43128295254833	Establishment of protein localization to chromosome	http://amigo.geneontology.org/amigo/term/GO:0070199	CCT4 CCT7 CCT8 CCT3
0.033925930514152	4	23	5.90356842668297	Regulation of cardiac muscle contraction by regulation of the release of sequestered calcium ion	http://amigo.geneontology.org/amigo/term/GO:0010881	CASQ2 CAMK2D CALM3 PRKACA
0.033925930514152	4	23	5.90356842668297	Mitochondrial ATP synthesis coupled proton transport	http://amigo.geneontology.org/amigo/term/GO:0042776	ATP5F1D ATP5F1B ATP5F1A ATP5MC3
0.029725900155535	4	22	6.17191244607765	Retrograde axonal transport	http://amigo.geneontology.org/amigo/term/GO:0008090	PAFAH1B1 SNAPIN KIF5B DYNC1H1
0.029725900155535	4	22	6.17191244607765	Postsynaptic neurotransmitter receptor internalization	http://amigo.geneontology.org/amigo/term/GO:0098884	DNM2 EPS15 AP2M1 ITGB3
0.029725900155535	4	22	6.17191244607765	Postsynaptic endocytosis	http://amigo.geneontology.org/amigo/term/GO:0140239	DNM2 EPS15 AP2M1 ITGB3
0.0262262205550586	4	21	6.46581303874801	RNA localization to Cajal body	http://amigo.geneontology.org/amigo/term/GO:0090670	CCT4 CCT7 CCT8 CCT3
0.0262262205550586	4	21	6.46581303874801	Telomerase RNA localization to Cajal body	http://amigo.geneontology.org/amigo/term/GO:0090671	CCT4 CCT7 CCT8 CCT3
0.0262262205550586	4	21	6.46581303874801	Telomerase RNA localization	http://amigo.geneontology.org/amigo/term/GO:0090672	CCT4 CCT7 CCT8 CCT3
0.0262262205550586	4	21	6.46581303874801	RNA localization to nucleus	http://amigo.geneontology.org/amigo/term/GO:0090685	CCT4 CCT7 CCT8 CCT3
0.0262262205550586	4	21	6.46581303874801	Negative regulation of amyloid precursor protein catabolic process	http://amigo.geneontology.org/amigo/term/GO:1902992	ROCK1 RTN4 RTN3 PRNP
0.0230344668210339	4	20	6.78910369068541	Nuclear migration	http://amigo.geneontology.org/amigo/term/GO:0007097	PAFAH1B1 SUN2 DYNC1H1 DCTN1
0.0230344668210339	4	20	6.78910369068541	Nonribosomal peptide biosynthetic process	http://amigo.geneontology.org/amigo/term/GO:0019184	GCLC GCLM HAGH CNDP2
0.0230344668210339	4	20	6.78910369068541	Regulation of mitochondrial depolarization	http://amigo.geneontology.org/amigo/term/GO:0051900	GCLC DCN GCLM RACK1
0.0230344668210339	4	20	6.78910369068541	Peptidyl-serine dephosphorylation	http://amigo.geneontology.org/amigo/term/GO:0070262	PPM1F PPP2CB SWAP70 PPP1CA
0.0230344668210339	4	20	6.78910369068541	Regulation of telomerase RNA localization to Cajal body	http://amigo.geneontology.org/amigo/term/GO:1904872	CCT4 CCT7 CCT8 CCT3
0.0197927902812383	4	19	7.14642493756359	Late endosome to vacuole transport via multivesicular body sorting pathway	http://amigo.geneontology.org/amigo/term/GO:0032511	VTA1 CHMP5 CHMP4B CHMP4A
0.0167706964593737	4	18	7.54344854520601	Glutathione biosynthetic process	http://amigo.geneontology.org/amigo/term/GO:0006750	GCLC GCLM HAGH CNDP2
0.0167706964593737	4	18	7.54344854520601	Regulation of cell communication by electrical coupling	http://amigo.geneontology.org/amigo/term/GO:0010649	CAV1 CASQ2 CAMK2D CALM3
0.0167706964593737	4	18	7.54344854520601	Nucleoside salvage	http://amigo.geneontology.org/amigo/term/GO:0043174	MTAP PUDP UPP1 APRT
0.0167706964593737	4	18	7.54344854520601	Regulation of synaptic vesicle endocytosis	http://amigo.geneontology.org/amigo/term/GO:1900242	ROCK1 PPP3CB CALM3 AP2M1
0.0167706964593737	4	18	7.54344854520601	Negative regulation of amyloid-beta formation	http://amigo.geneontology.org/amigo/term/GO:1902430	ROCK1 RTN4 RTN3 PRNP
0.0167706964593737	4	18	7.54344854520601	Regulation of amyloid fibril formation	http://amigo.geneontology.org/amigo/term/GO:1905906	PFDN4 CRYAB PFDN2 VBP1
0.0167706964593737	4	18	7.54344854520601	Regulation of early endosome to late endosome transport	http://amigo.geneontology.org/amigo/term/GO:2000641	MAPK1 SNX3 RDX MAP2K1
0.0141018868591182	4	17	7.98718081257107	Formation of cytoplasmic translation initiation complex	http://amigo.geneontology.org/amigo/term/GO:0001732	EIF3B EIF3A EIF3F EIF3CL
0.0141018868591182	4	17	7.98718081257107	AMP metabolic process	http://amigo.geneontology.org/amigo/term/GO:0046033	AMPD3 NUDT2 ADSS1 APRT
0.0141018868591182	4	17	7.98718081257107	IMP metabolic process	http://amigo.geneontology.org/amigo/term/GO:0046040	PAICS AMPD3 ATIC ADSS1
0.0141018868591182	4	17	7.98718081257107	Regulation of Golgi organization	http://amigo.geneontology.org/amigo/term/GO:1903358	DNM2 MAPK1 PDCD10 MAP2K1
0.0117470466550289	4	16	8.48637961335677	Establishment of protein localization to telomere	http://amigo.geneontology.org/amigo/term/GO:0070200	CCT4 CCT7 CCT8 CCT3
0.0117470466550289	4	16	8.48637961335677	Positive regulation of telomerase RNA localization to Cajal body	http://amigo.geneontology.org/amigo/term/GO:1904874	CCT4 CCT7 CCT8 CCT3
0.00956419507475605	4	15	9.05213825424722	Fructose metabolic process	http://amigo.geneontology.org/amigo/term/GO:0006000	AKR1B1 FBP2 SORD TKFC
0.00956419507475605	4	15	9.05213825424722	Negative regulation of amyloid fibril formation	http://amigo.geneontology.org/amigo/term/GO:1905907	PFDN4 CRYAB PFDN2 VBP1
0.00773157981621875	4	14	9.69871955812202	Amino sugar catabolic process	http://amigo.geneontology.org/amigo/term/GO:0046348	GNPDA1 MGAT1 CHI3L1 CHIT1
0.00773157981621875	4	14	9.69871955812202	Protein localization to nucleoplasm	http://amigo.geneontology.org/amigo/term/GO:1990173	CCT4 CCT7 CCT8 CCT3
0.00458413065014096	4	12	11.315172817809	Regulation of establishment of protein localization to chromosome	http://amigo.geneontology.org/amigo/term/GO:0070202	CCT4 CCT7 CCT8 CCT3
0.00458413065014096	4	12	11.315172817809	Cellular response to aldehyde	http://amigo.geneontology.org/amigo/term/GO:0110096	AKR1B1 ESD AIFM1 ADH5
0.00458413065014096	4	12	11.315172817809	Protein localization to nuclear body	http://amigo.geneontology.org/amigo/term/GO:1903405	CCT4 CCT7 CCT8 CCT3
0.00458413065014096	4	12	11.315172817809	Protein localization to Cajal body	http://amigo.geneontology.org/amigo/term/GO:1904867	CCT4 CCT7 CCT8 CCT3
0.0034019597229695	4	11	12.3438248921553	Regulation of establishment of protein localization to telomere	http://amigo.geneontology.org/amigo/term/GO:0070203	CCT4 CCT7 CCT8 CCT3
0.0034019597229695	4	11	12.3438248921553	Regulation of protein localization to Cajal body	http://amigo.geneontology.org/amigo/term/GO:1904869	CCT4 CCT7 CCT8 CCT3
0.0034019597229695	4	11	12.3438248921553	Positive regulation of protein localization to Cajal body	http://amigo.geneontology.org/amigo/term/GO:1904871	CCT4 CCT7 CCT8 CCT3
0.00244109485787943	4	10	13.5782073813708	Positive regulation of establishment of protein localization to telomere	http://amigo.geneontology.org/amigo/term/GO:1904851	CCT4 CCT7 CCT8 CCT3
0.00244109485787943	4	10	13.5782073813708	ESCRT complex disassembly	http://amigo.geneontology.org/amigo/term/GO:1904896	VTA1 CHMP5 CHMP2A CHMP1B
0.00244109485787943	4	10	13.5782073813708	ESCRT III complex disassembly	http://amigo.geneontology.org/amigo/term/GO:1904903	VTA1 CHMP5 CHMP2A CHMP1B
0.0751797663061966	3	17	5.99038560942831	Toll-like receptor 2 signaling pathway	http://amigo.geneontology.org/amigo/term/GO:0034134	CYBA HMGB1 LYN
0.0751797663061966	3	17	5.99038560942831	Purine-containing compound salvage	http://amigo.geneontology.org/amigo/term/GO:0043101	MTAP AMPD3 APRT
0.0667918118336818	3	16	6.36478471001757	Pentose-phosphate shunt	http://amigo.geneontology.org/amigo/term/GO:0006098	H6PD PGM2 RPE
0.0667918118336818	3	16	6.36478471001757	RNA interference	http://amigo.geneontology.org/amigo/term/GO:0016246	TSNAX DHX9 TSN
0.0667918118336818	3	16	6.36478471001757	Ketone catabolic process	http://amigo.geneontology.org/amigo/term/GO:0042182	HAGH NQO2 CYP4F2
0.0578607110273962	3	15	6.78910369068541	Negative regulation of humoral immune response	http://amigo.geneontology.org/amigo/term/GO:0002921	CD59 SPINK5 VSIG4
0.0578607110273962	3	15	6.78910369068541	Nucleotide salvage	http://amigo.geneontology.org/amigo/term/GO:0043173	AMPD3 UPP1 APRT
0.0578607110273962	3	15	6.78910369068541	Proteasome assembly	http://amigo.geneontology.org/amigo/term/GO:0043248	PSMD5 PSMD10 PSMD9
0.0578607110273962	3	15	6.78910369068541	Organelle inheritance	http://amigo.geneontology.org/amigo/term/GO:0048308	MAPK1 PDCD10 MAP2K1
0.0578607110273962	3	15	6.78910369068541	Golgi inheritance	http://amigo.geneontology.org/amigo/term/GO:0048313	MAPK1 PDCD10 MAP2K1
0.0578607110273962	3	15	6.78910369068541	Regulation of plasma membrane organization	http://amigo.geneontology.org/amigo/term/GO:1903729	DNM2 ASAP1 PRKCD
0.0512734575453175	3	14	7.27403966859151	Negative regulation of microtubule polymerization	http://amigo.geneontology.org/amigo/term/GO:0031115	MAPRE1 STMN1 EML2
0.0512734575453175	3	14	7.27403966859151	Low-density lipoprotein receptor particle metabolic process	http://amigo.geneontology.org/amigo/term/GO:0032799	CLTA AP2M1 AP2A1
0.0512734575453175	3	14	7.27403966859151	Low-density lipoprotein particle receptor catabolic process	http://amigo.geneontology.org/amigo/term/GO:0032802	CLTA AP2M1 AP2A1
0.0429774718999117	3	13	7.83358118156009	Posttranslational protein targeting to endoplasmic reticulum membrane	http://amigo.geneontology.org/amigo/term/GO:0006620	CHMP4B GET3 CHMP4A
0.0429774718999117	3	13	7.83358118156009	Aldehyde catabolic process	http://amigo.geneontology.org/amigo/term/GO:0046185	HAGH ESD ADH5
0.0429774718999117	3	13	7.83358118156009	Fibroblast activation	http://amigo.geneontology.org/amigo/term/GO:0072537	GCLC GCLM AKAP12
0.0429774718999117	3	13	7.83358118156009	Negative regulation of alcohol biosynthetic process	http://amigo.geneontology.org/amigo/term/GO:1902931	ERLIN1 NFKB1 PLEK
0.0360144116596615	3	12	8.48637961335677	Negative regulation of protein autophosphorylation	http://amigo.geneontology.org/amigo/term/GO:0031953	MVP CAV1 IMPACT
0.0360144116596615	3	12	8.48637961335677	Positive regulation of nuclease activity	http://amigo.geneontology.org/amigo/term/GO:0032075	RPS3 PRKCD HMGB2
0.0360144116596615	3	12	8.48637961335677	Regulation of toll-like receptor 2 signaling pathway	http://amigo.geneontology.org/amigo/term/GO:0034135	CYBA HMGB1 LYN
0.0360144116596615	3	12	8.48637961335677	Regulation of Fc receptor mediated stimulatory signaling pathway	http://amigo.geneontology.org/amigo/term/GO:0060368	CSK CD47 LYN
0.0360144116596615	3	12	8.48637961335677	Regulation of cell communication by electrical coupling involved in cardiac conduction	http://amigo.geneontology.org/amigo/term/GO:1901844	CAV1 CAMK2D CALM3
0.0294673609075338	3	11	9.25786866911647	Fructose 6-phosphate metabolic process	http://amigo.geneontology.org/amigo/term/GO:0006002	FBP2 PFKL PFKM
0.0294673609075338	3	11	9.25786866911647	IMP biosynthetic process	http://amigo.geneontology.org/amigo/term/GO:0006188	PAICS AMPD3 ATIC
0.0294673609075338	3	11	9.25786866911647	Interleukin-1 alpha production	http://amigo.geneontology.org/amigo/term/GO:0032610	IL1R2 CASP1 IL16
0.0294673609075338	3	11	9.25786866911647	Regulation of interleukin-1 alpha production	http://amigo.geneontology.org/amigo/term/GO:0032650	IL1R2 CASP1 IL16
0.0294673609075338	3	11	9.25786866911647	Positive regulation of mitochondrial calcium ion concentration	http://amigo.geneontology.org/amigo/term/GO:0051561	ATP2A1 TGM2 FIS1
0.0235237662857199	3	10	10.1836555360281	DNA topological change	http://amigo.geneontology.org/amigo/term/GO:0006265	HMGB2 HMGB1 TOP1
0.0235237662857199	3	10	10.1836555360281	Fructose 1,6-bisphosphate metabolic process	http://amigo.geneontology.org/amigo/term/GO:0030388	FBP2 PFKL PFKM
0.0235237662857199	3	10	10.1836555360281	Regulation of deoxyribonuclease activity	http://amigo.geneontology.org/amigo/term/GO:0032070	RPS3 PRKCD HMGB1
0.0235237662857199	3	10	10.1836555360281	Response to nitrosative stress	http://amigo.geneontology.org/amigo/term/GO:0051409	GCLC GCLM ADH5
0.0235237662857199	3	10	10.1836555360281	Glucosamine-containing compound catabolic process	http://amigo.geneontology.org/amigo/term/GO:1901072	GNPDA1 CHI3L1 CHIT1
0.018519620319001	3	9	11.315172817809	Diadenosine polyphosphate metabolic process	http://amigo.geneontology.org/amigo/term/GO:0015959	KARS1 MAPK1 NUDT3
0.018519620319001	3	9	11.315172817809	Negative regulation of endoplasmic reticulum calcium ion concentration	http://amigo.geneontology.org/amigo/term/GO:0032471	ATP2A1 TGM2 FIS1
0.018519620319001	3	9	11.315172817809	Hepatic stellate cell activation	http://amigo.geneontology.org/amigo/term/GO:0035733	GCLC GCLM AKAP12
0.018519620319001	3	9	11.315172817809	Mitochondrial fragmentation involved in apoptotic process	http://amigo.geneontology.org/amigo/term/GO:0043653	VPS35 ATG3 FIS1
0.018519620319001	3	9	11.315172817809	Bergmann glial cell differentiation	http://amigo.geneontology.org/amigo/term/GO:0060020	MAPK1 MAP2K1 PTPN11
0.0138672287404004	3	8	12.7295694200351	Neutrophil differentiation	http://amigo.geneontology.org/amigo/term/GO:0030223	LBR FASN EVI2B
0.0138672287404004	3	8	12.7295694200351	Regulation of endodeoxyribonuclease activity	http://amigo.geneontology.org/amigo/term/GO:0032071	RPS3 PRKCD HMGB1
0.00652636404888692	3	6	16.9727592267135	AMP biosynthetic process	http://amigo.geneontology.org/amigo/term/GO:0006167	NUDT2 ADSS1 APRT
0.00652636404888692	3	6	16.9727592267135	SCF complex assembly	http://amigo.geneontology.org/amigo/term/GO:0010265	CUL1 CAND1 SKP1
0.0019011619945463	3	4	25.4591388400703	Proteasome regulatory particle assembly	http://amigo.geneontology.org/amigo/term/GO:0070682	PSMD5 PSMD10 PSMD9
0.0717898298628598	2	6	11.315172817809	MRNA 3 -splice site recognition	http://amigo.geneontology.org/amigo/term/GO:0000389	SF3A1 SF3A3
0.0717898298628598	2	6	11.315172817809	Chitin metabolic process	http://amigo.geneontology.org/amigo/term/GO:0006030	CHI3L1 CHIT1
0.0717898298628598	2	6	11.315172817809	Chitin catabolic process	http://amigo.geneontology.org/amigo/term/GO:0006032	CHI3L1 CHIT1
0.0717898298628598	2	6	11.315172817809	Isocitrate metabolic process	http://amigo.geneontology.org/amigo/term/GO:0006102	ACO2 IDH2
0.0717898298628598	2	6	11.315172817809	Methylglyoxal metabolic process	http://amigo.geneontology.org/amigo/term/GO:0009438	HAGH GLO1
0.0717898298628598	2	6	11.315172817809	Pentose catabolic process	http://amigo.geneontology.org/amigo/term/GO:0019323	NUDT5 RPE
0.0717898298628598	2	6	11.315172817809	Peptide cross-linking via chondroitin 4-sulfate glycosaminoglycan	http://amigo.geneontology.org/amigo/term/GO:0019800	DCN BGN
0.0717898298628598	2	6	11.315172817809	Myosin filament organization	http://amigo.geneontology.org/amigo/term/GO:0031033	TCAP MYH11
0.0717898298628598	2	6	11.315172817809	ISG15-protein conjugation	http://amigo.geneontology.org/amigo/term/GO:0032020	UBA7 ISG15
0.0717898298628598	2	6	11.315172817809	Positive regulation of nucleobase-containing compound transport	http://amigo.geneontology.org/amigo/term/GO:0032241	CPSF6 DHX9
0.0717898298628598	2	6	11.315172817809	Trachea formation	http://amigo.geneontology.org/amigo/term/GO:0060440	MAPK1 MAP2K1
0.0717898298628598	2	6	11.315172817809	Keratinocyte apoptotic process	http://amigo.geneontology.org/amigo/term/GO:0097283	SFRP4 SERPINB13
0.0717898298628598	2	6	11.315172817809	Purine ribonucleotide salvage	http://amigo.geneontology.org/amigo/term/GO:0106380	AMPD3 APRT
0.0717898298628598	2	6	11.315172817809	Quinone catabolic process	http://amigo.geneontology.org/amigo/term/GO:1901662	NQO2 CYP4F2
0.0717898298628598	2	6	11.315172817809	Regulation of keratinocyte apoptotic process	http://amigo.geneontology.org/amigo/term/GO:1902172	SFRP4 SERPINB13
0.0717898298628598	2	6	11.315172817809	Positive regulation of microtubule binding	http://amigo.geneontology.org/amigo/term/GO:1904528	MAPRE1 PPP2CB
0.0717898298628598	2	6	11.315172817809	Positive regulation of protein localization to cell cortex	http://amigo.geneontology.org/amigo/term/GO:1904778	NUMA1 EPB41
0.0717898298628598	2	6	11.315172817809	Negative regulation of guanyl-nucleotide exchange factor activity	http://amigo.geneontology.org/amigo/term/GO:1905098	STMN1 EIF2S1
0.0550670250389803	2	5	13.5782073813708	Translation reinitiation	http://amigo.geneontology.org/amigo/term/GO:0002188	EIF3A DENR
0.0550670250389803	2	5	13.5782073813708	Myosin filament assembly	http://amigo.geneontology.org/amigo/term/GO:0031034	TCAP MYH11
0.0550670250389803	2	5	13.5782073813708	Negative regulation of translational initiation in response to stress	http://amigo.geneontology.org/amigo/term/GO:0032057	EIF2S1 PML
0.0550670250389803	2	5	13.5782073813708	Positive regulation of deoxyribonuclease activity	http://amigo.geneontology.org/amigo/term/GO:0032077	RPS3 PRKCD
0.0550670250389803	2	5	13.5782073813708	Positive regulation of toll-like receptor 9 signaling pathway	http://amigo.geneontology.org/amigo/term/GO:0034165	RTN4 HMGB1
0.0550670250389803	2	5	13.5782073813708	SNARE complex disassembly	http://amigo.geneontology.org/amigo/term/GO:0035494	NAPA NSF
0.0550670250389803	2	5	13.5782073813708	Apolipoprotein A-I-mediated signaling pathway	http://amigo.geneontology.org/amigo/term/GO:0038027	RHOA ITGB3
0.0550670250389803	2	5	13.5782073813708	Positive regulation of RNA export from nucleus	http://amigo.geneontology.org/amigo/term/GO:0046833	CPSF6 DHX9
0.0550670250389803	2	5	13.5782073813708	Positive regulation of cyclic-nucleotide phosphodiesterase activity	http://amigo.geneontology.org/amigo/term/GO:0051343	CALM3 RACK1
0.0550670250389803	2	5	13.5782073813708	CRD-mediated mRNA stabilization	http://amigo.geneontology.org/amigo/term/GO:0070934	SYNCRIP DHX9
0.0550670250389803	2	5	13.5782073813708	Minus-end-directed organelle transport along microtubule	http://amigo.geneontology.org/amigo/term/GO:0072385	RAB6A DYNC1H1
0.0550670250389803	2	5	13.5782073813708	Terminal button organization	http://amigo.geneontology.org/amigo/term/GO:0072553	VPS35 SNAPIN
0.0550670250389803	2	5	13.5782073813708	Viral translational termination-reinitiation	http://amigo.geneontology.org/amigo/term/GO:0075525	EIF3B EIF3A
0.0550670250389803	2	5	13.5782073813708	Response to L-phenylalanine derivative	http://amigo.geneontology.org/amigo/term/GO:1904386	GCLC GCLM
0.0550670250389803	2	5	13.5782073813708	Positive regulation of spindle assembly	http://amigo.geneontology.org/amigo/term/GO:1905832	NUMA1 DYNC1H1
0.0550670250389803	2	5	13.5782073813708	Regulation of cysteine-type endopeptidase activity involved in execution phase of apoptosis	http://amigo.geneontology.org/amigo/term/GO:2001270	RPS3 PAK2
0.0379867542684181	2	4	16.9727592267135	Skeletal muscle myosin thick filament assembly	http://amigo.geneontology.org/amigo/term/GO:0030241	TCAP MYH11
0.0379867542684181	2	4	16.9727592267135	Positive regulation of endodeoxyribonuclease activity	http://amigo.geneontology.org/amigo/term/GO:0032079	RPS3 PRKCD
0.0379867542684181	2	4	16.9727592267135	Sequestering of TGFbeta in extracellular matrix	http://amigo.geneontology.org/amigo/term/GO:0035583	LTBP1 FBN1
0.0379867542684181	2	4	16.9727592267135	Response to human chorionic gonadotropin	http://amigo.geneontology.org/amigo/term/GO:0044752	GCLC GCLM
0.0379867542684181	2	4	16.9727592267135	Formaldehyde metabolic process	http://amigo.geneontology.org/amigo/term/GO:0046292	ESD ADH5
0.0379867542684181	2	4	16.9727592267135	Golgi vesicle docking	http://amigo.geneontology.org/amigo/term/GO:0048211	USO1 NSF
0.0379867542684181	2	4	16.9727592267135	Striated muscle myosin thick filament assembly	http://amigo.geneontology.org/amigo/term/GO:0071688	TCAP MYH11
0.0379867542684181	2	4	16.9727592267135	Endoplasmic reticulum tubular network formation	http://amigo.geneontology.org/amigo/term/GO:0071787	RTN4 RTN3
0.0379867542684181	2	4	16.9727592267135	Regulation of Golgi inheritance	http://amigo.geneontology.org/amigo/term/GO:0090170	MAPK1 MAP2K1
0.0379867542684181	2	4	16.9727592267135	Response to thyroxine	http://amigo.geneontology.org/amigo/term/GO:0097068	GCLC GCLM
0.0379867542684181	2	4	16.9727592267135	Regulation of late endosome to lysosome transport	http://amigo.geneontology.org/amigo/term/GO:1902822	VPS35 SNAPIN
0.0379867542684181	2	4	16.9727592267135	Regulation of vacuolar transport	http://amigo.geneontology.org/amigo/term/GO:1903335	VPS35 SNAPIN
0.0232212729067974	2	3	22.630345635618	Hexitol metabolic process	http://amigo.geneontology.org/amigo/term/GO:0006059	AKR1B1 SORD
0.0232212729067974	2	3	22.630345635618	Fumarate metabolic process	http://amigo.geneontology.org/amigo/term/GO:0006106	FH GOT2
0.0232212729067974	2	3	22.630345635618	NADP biosynthetic process	http://amigo.geneontology.org/amigo/term/GO:0006741	NADK IDH2
0.0232212729067974	2	3	22.630345635618	Diadenosine polyphosphate biosynthetic process	http://amigo.geneontology.org/amigo/term/GO:0015960	KARS1 MAPK1
0.0232212729067974	2	3	22.630345635618	Diadenosine tetraphosphate metabolic process	http://amigo.geneontology.org/amigo/term/GO:0015965	KARS1 MAPK1
0.0232212729067974	2	3	22.630345635618	Diadenosine tetraphosphate biosynthetic process	http://amigo.geneontology.org/amigo/term/GO:0015966	KARS1 MAPK1
0.0232212729067974	2	3	22.630345635618	Protein import into mitochondrial intermembrane space	http://amigo.geneontology.org/amigo/term/GO:0045041	HSPD1 AIFM1
0.0232212729067974	2	3	22.630345635618	Formaldehyde catabolic process	http://amigo.geneontology.org/amigo/term/GO:0046294	ESD ADH5
0.0232212729067974	2	3	22.630345635618	Positive regulation of mitotic centrosome separation	http://amigo.geneontology.org/amigo/term/GO:0046604	NSFL1C RANBP1
0.0232212729067974	2	3	22.630345635618	U2-type prespliceosome assembly	http://amigo.geneontology.org/amigo/term/GO:1903241	SF3A1 SF3A3

## Sheet: Table S2 KEGG enrichment all
enrichment_all-3
Enrichment FDR	nGenes	Pathway Genes	Fold Enrichment	Pathway	URL	Genes
2.61246997667459e-48	50	84	16.7519106407995	Complement and coagulation cascades	http://www.genome.jp/kegg-bin/show_pathway?hsa04610	MASP2 C6 CPB2 CFHR2 F11 SERPIND1 F9 SERPINE1 C5 VTN VWF C7 C9 KNG1 PROC SERPINC1 CLU PLG C4BPA C4BPB C3 F10 MASP1 F12 CFHR5 F13B SERPING1 C8A C1QC MBL2 ITGAM FGG FGA FGB C1QA C8G F2 C1S PROS1 SERPINA5 CD55 SERPINB2 F5 CFI C2 C4A CFB CFHR1 CFD SERPINF2
1.04655328615099e-18	30	94	8.98187549251379	Staphylococcus aureus infection	http://www.genome.jp/kegg-bin/show_pathway?hsa05150	MASP2 ICAM1 C5 PLG C3 MASP1 KRT17 DSG1 C1QC MBL2 ITGAM KRT15 KRT13 KRT9 KRT27 FGG C1QA C1S KRT10 KRT16 KRT14 CFI C2 C4A CFB KRT31 KRT33B KRT23 CFD DEFA1
4.09316419690495e-15	29	115	7.09698336017177	Carbon metabolism	http://www.genome.jp/kegg-bin/show_pathway?hsa01200	MDH1 CS ME1 PKM ENO1 PGK1 ENO3 ALDOC GAPDH TPI1 ENO2 GOT1 CAT ACO1 PGLS ALDOB IDH1 PGD MDH2 ALDOA RPIA G6PD HK3 TKT PGAM2 FBP1 GPT PGAM1 TALDO1
6.13480130237856e-13	22	75	8.25534156378601	Biosynthesis of amino acids	http://www.genome.jp/kegg-bin/show_pathway?hsa01230	CS PKM ENO1 PGK1 ENO3 ALDOC GAPDH TPI1 ENO2 ARG1 GOT1 ACO1 ASL ALDOB IDH1 ALDOA RPIA TKT PGAM2 GPT PGAM1 TALDO1
6.54759447355357e-11	19	67	7.98091026349733	Glycolysis / Gluconeogenesis	http://www.genome.jp/kegg-bin/show_pathway?hsa00010	PKM ENO1 PGM1 PGK1 ENO3 ALDOC ALDH2 GAPDH TPI1 ENO2 LDHB ALDOB ALDOA HK3 PGAM2 FBP1 PGAM1 BPGM LDHA
2.40864013790204e-10	31	200	4.3621975308642	Focal adhesion	http://www.genome.jp/kegg-bin/show_pathway?hsa04510	ITGA2B VCL TNC ACTN1 ACTB LAMB1 COMP VTN VWF MYL2 THBS4 FN1 MYL12B SPP1 VASP RAP1B RAC2 FLNC LAMC1 FLNB TLN1 THBS1 COL6A1 COL6A2 COL6A3 COL1A2 MYLPF LAMA2 FLNA ACTN4 ZYX
1.05057400349782e-09	15	46	9.17713365539452	Proteasome	http://www.genome.jp/kegg-bin/show_pathway?hsa03050	PSMB1 PSMA4 PSMA3 PSMA6 PSMA7 PSMA2 PSMD3 PSMA1 PSMB7 PSMB6 PSMA5 PSMB4 PSMB10 PSMB9 PSME2
1.05057400349782e-09	20	88	6.39618406285073	ECM-receptor interaction	http://www.genome.jp/kegg-bin/show_pathway?hsa04512	ITGA2B CD44 TNC LAMB1 COMP VTN VWF THBS4 FN1 SPP1 LAMC1 THBS1 COL6A1 COL6A2 HSPG2 COL6A3 COL1A2 GP5 GP1BA LAMA2
1.46355242293539e-09	105	1527	1.93519124887822	Metabolic pathways	http://www.genome.jp/kegg-bin/show_pathway?hsa01100	LAP3 AK2 GGCT MDH1 TYMP ADSS2 CS ME1 PKM PYGM ENO1 NT5C2 PGM1 HAL GSTP1 BLVRB ADA2 NANS PYGL GSS AHCY ALG13 PGK1 FAH CA2 GSR ASAH1 CKM NAMPT AK1 PTGDS ENO3 ALDOC BST1 LTA4H ALDH2 GAPDH TPI1 ENO2 LDHB MAN1A1 GPLD1 VNN1 VNN2 NIT2 AKR1A1 PRDX6 ARG1 GOT1 CAT ACO1 DBH NAGK ASL PGLS ATP6V1E1 AOC3 ACLY CKMT2 CA1 ALDOB ENPP2 IDH1 IMPA2 PGD SELENBP1 PLA2G7 MDH2 ALAD GSTO1 ALDOA RPIA CDA PDXK G6PD FDPS HK3…
1.58554456376189e-09	33	246	3.77530864197531	Shigellosis	http://www.genome.jp/kegg-bin/show_pathway?hsa05131	CAPN1 CD44 VCL ACTN1 ACTB PYCARD PFN1 UBE2D3 ARPC3 MYL2 MAPK14 ACTR3 MYL12B C3 CAPNS1 ARPC1B H3-3B TLN1 ACTR2 RPS27A CAST HK3 ARPC5 ARPC2 SEPTIN2 CD14 CYCS UBE2N MYLPF ARPC4 UBE2V1 H3C10 ACTN4
1.58554456376189e-09	21	102	5.79419026870007	Amoebiasis	http://www.genome.jp/kegg-bin/show_pathway?hsa05146	VCL SERPINB3 ACTN1 RAB7A LAMB1 CTSG HSPB1 C9 FN1 PRDX1 ARG1 LAMC1 C8A COL1A2 COL3A1 ITGAM CD14 C8G LAMA2 SERPINB4 ACTN4
1.93835894976032e-09	24	136	4.96644880174292	Systemic lupus erythematosus	http://www.genome.jp/kegg-bin/show_pathway?hsa05322	C6 ACTN1 CTSG C5 C7 C9 MACROH2A1 H2BC11 C3 H3-3B C8A C1QC C1QA C8G C1S H2BC13 H2BC12 C2 C4A H4C9 ELANE H2AC4 H3C10 ACTN4
4.52895039263706e-09	34	272	3.5179012345679	Prion disease	http://www.genome.jp/kegg-bin/show_pathway?hsa05020	PSMB1 C6 PSMA4 HSPA5 PSMA3 PSMA6 PSMA7 PSMA2 C5 PSMD3 HSPA8 MAPK14 C7 C9 HSPA2 TUBA4A RAC2 PSMA1 LAMC1 PSMB7 SOD1 PSMB6 PSMA5 NCAM1 C8A C1QC PSMB4 CYBB TUBA1C STIP1 CYCS C1QA C8G HSPA1B
7.04287256479360e-09	32	249	3.61679805642322	Salmonella infection	http://www.genome.jp/kegg-bin/show_pathway?hsa05132	ACTB RAB7A HSP90AA1 DYNLL1 HSP90AB1 PYCARD PFN1 ARPC3 MYL2 GAPDH MAPK14 ACTR3 MYL12B AHNAK TUBA4A FLNC ARPC1B FLNB TXN ACTR2 ARPC5 ARPC2 HSP90B1 TUBA1C CD14 CYCS DCTN2 MYLPF ANXA2 FLNA S100A10 ARPC4
1.60024945024295e-08	22	128	4.83711419753086	Lysosome	http://www.genome.jp/kegg-bin/show_pathway?hsa04142	FUCA2 LAMP2 CTSA GNPTG CTSG LGMN CTSH ASAH1 CTSD NPC2 CTSL CTSV CLTC ABCB9 CTSS AP1G1 FUCA1 LAMP1 GM2A IGF2R HEXA
5.62832088839404e-08	11	30	10.3191769547325	Pentose phosphate pathway	http://www.genome.jp/kegg-bin/show_pathway?hsa00030	PGM1 ALDOC PGLS ALDOB PGD ALDOA RPIA G6PD TKT FBP1 TALDO1
5.69263608011995e-08	20	114	4.93740524149881	Leukocyte transendothelial migration	http://www.genome.jp/kegg-bin/show_pathway?hsa04670	VCL ACTN1 ACTB MMP2 ICAM1 EZR MMP9 MYL2 MAPK14 MYL12B VASP RAP1B RAC2 MSN VCAM1 CYBB ITGAM CDH5 MYLPF ACTN4
6.16277173033453e-08	26	190	3.85117608836907	Neutrophil extracellular trap formation	http://www.genome.jp/kegg-bin/show_pathway?hsa04613	MPO ITGA2B ACTB CTSG C5 VWF MAPK14 MACROH2A1 H2BC11 C3 RAC2 H3-3B CYBB ITGAM FGG FGA FGB H2BC13 GP1BA H2BC12 H4C9 ELANE H2AC4 AZU1 H3C10 PADI4
6.16277173033453e-08	28	217	3.63138191955396	Regulation of actin cytoskeleton	http://www.genome.jp/kegg-bin/show_pathway?hsa04810	ITGA2B VCL ACTN1 ACTB EZR MYH9 MYH14 PFN1 ARPC3 MYL2 KNG1 ACTR3 FN1 MYL12B RAC2 ARPC1B ACTR2 IQGAP1 MSN GSN ARPC2 ITGAM CFL1 MYLPF F2 TMSB4X ARPC4 ACTN4
6.30321290293198e-08	29	232	3.5179012345679	Coronavirus disease	http://www.genome.jp/kegg-bin/show_pathway?hsa05171	MASP2 C6 NRP1 RPS16 C5 VWF MAPK14 C7 C9 C3 MASP1 F13B RPS27A C8A C1QC CYBB MBL2 FGG FGA FGB C1QA C8G F2 C1S C2 C4A RPS28 CFB CFD
2.60211117965091e-07	22	151	4.100335213801	Phagosome	http://www.genome.jp/kegg-bin/show_pathway?hsa04145	MPO LAMP2 TFRC ACTB RAB7A CORO1A COMP THBS4 COLEC11 C3 TUBA4A ATP6V1E1 CTSL THBS1 CTSS CYBB MBL2 TUBA1C ITGAM CD14 CALR LAMP1
2.60211117965091e-07	21	138	4.28266237251744	Estrogen signaling pathway	http://www.genome.jp/kegg-bin/show_pathway?hsa04915	HSP90AA1 MMP2 HSP90AB1 MMP9 HSPA8 CTSD HSPA2 KRT17 HSP90B1 KRT15 KRT13 KRT9 KRT27 CALML5 KRT10 KRT16 KRT14 HSPA1B KRT31 KRT33B KRT23
6.76064568421464e-07	18	109	4.64750254841998	HIF-1 signaling pathway	http://www.genome.jp/kegg-bin/show_pathway?hsa04066	TFRC ENO1 TF PGK1 TIMP1 ELOB SERPINE1 ENO3 ALDOC GAPDH ENO2 LDHB SLC2A1 ALDOB ALDOA HK3 CYBB LDHA
7.20064115167899e-07	15	76	5.55458089668616	Pertussis	http://www.genome.jp/kegg-bin/show_pathway?hsa05133	PYCARD C5 MAPK14 C4BPA C4BPB C3 SERPING1 C1QC ITGAM CFL1 C1QA CALML5 C1S C2 C4A
9.24793469691824e-07	19	124	4.31226602947033	Platelet activation	http://www.genome.jp/kegg-bin/show_pathway?hsa04611	ITGA2B ACTB APBB1IP VWF MAPK14 MYL12B VASP RAP1B TLN1 FERMT3 COL1A2 COL3A1 FGG FGA FGB GP5 F2 GP1BA PRKG1
9.56675344984525e-07	15	78	5.41215574548908	Antigen processing and presentation	http://www.genome.jp/kegg-bin/show_pathway?hsa04612	HSPA5 HSP90AA1 HSP90AB1 LGMN HSPA8 HSPA2 CTSL CTSS PDIA3 HSPA4 CALR HSPA1B B2M PSME2
1.39093638118746e-06	12	50	6.75437037037037	Cholesterol metabolism	http://www.genome.jp/kegg-bin/show_pathway?hsa04979	APOH PLTP APOA4 APOC3 APOA1 LRP1 APOE APOC1 APOA2 PCSK9 LCAT APOC2
1.59489892921577e-06	22	169	3.66361312002338	Tight junction	http://www.genome.jp/kegg-bin/show_pathway?hsa04530	ACTN1 ACTB EZR MYL6 MYH9 MYH14 SLC9A3R1 ARPC3 MYL2 ACTR3 MYL12B VASP TUBA4A ARPC1B ACTR2 MSN ARPC5 ARPC2 TUBA1C HSPA4 ARPC4 ACTN4
4.4555236205738e-06	19	138	3.87478976561102	Fluid shear stress and atherosclerosis	http://www.genome.jp/kegg-bin/show_pathway?hsa05418	ITGA2B ACTB HSP90AA1 GSTP1 MMP2 ICAM1 HSP90AB1 MMP9 MAPK14 RAC2 CTSL TXN GSTO1 VCAM1 HSP90B1 CALML5 CDH5 SUMO3 GSTM2
5.48418525719828e-06	12	57	5.92488628979857	Glutathione metabolism	http://www.genome.jp/kegg-bin/show_pathway?hsa00480	LAP3 GGCT GSTP1 GSS GSR IDH1 PGD GSTO1 G6PD ANPEP GPX3 GSTM2
5.48418525719828e-06	12	57	5.92488628979857	Legionellosis	http://www.genome.jp/kegg-bin/show_pathway?hsa05134	PYCARD HSPA8 C3 HSPA2 EEF1A1 VCP ITGAM CD14 CYCS RAB1B HSPA1B EEF1G
5.48418525719828e-06	15	90	4.69053497942387	Hypertrophic cardiomyopathy	http://www.genome.jp/kegg-bin/show_pathway?hsa05410	ITGA2B ACTB MYH7 MYL2 TNNC1 TPM1 TPM3 CACNA2D1 TTN LMNA MYL3 TPM4 DES LAMA2 TPM2
5.65517634069757e-06	21	169	3.4970852509314	Protein processing in endoplasmic reticulum	http://www.genome.jp/kegg-bin/show_pathway?hsa04141	CAPN1 HSPA5 HSP90AA1 HSP90AB1 UBE2D3 HSPA8 MAN1A1 RAD23B RRBP1 HSPA2 PRKCSH PDIA6 PDIA4 VCP HSP90B1 PDIA3 CALR P4HB BCAP31 HSPA1B HYOU1
1.20978977129131e-05	15	96	4.39737654320988	Dilated cardiomyopathy	http://www.genome.jp/kegg-bin/show_pathway?hsa05414	ITGA2B ACTB MYH7 MYL2 TNNC1 TPM1 TPM3 CACNA2D1 TTN LMNA MYL3 TPM4 DES LAMA2 TPM2
1.80178077638534e-05	22	197	3.1428965344363	Pathogenic Escherichia coli infection	http://www.genome.jp/kegg-bin/show_pathway?hsa05130	ACTB EZR MYH9 PYCARD MYH14 SLC9A3R1 ARPC3 GAPDH PTPN6 MAPK14 NCL ACTR3 TUBA4A ARPC1B ACTR2 MYO10 ARPC5 ARPC2 TUBA1C CYCS F2 ARPC4
6.7824577142802e-05	22	214	2.89322718356986	Lipid and atherosclerosis	http://www.genome.jp/kegg-bin/show_pathway?hsa05417	BID HSPA5 HSP90AA1 ICAM1 HSP90AB1 MMP9 PYCARD HSPA8 APOA4 MAPK14 APOA1 HSPA2 RAP1B LBP VCAM1 CYBB HSP90B1 CD14 HSPA4 CYCS CALML5 HSPA1B
8.61638473405809e-05	30	354	2.38501778614773	PI3K-Akt signaling pathway	http://www.genome.jp/kegg-bin/show_pathway?hsa04151	ITGA2B TNC GNB1 HSP90AA1 LAMB1 HSP90AB1 CDC37 COMP VTN VWF THBS4 FN1 SPP1 YWHAH YWHAQ LAMC1 THBS1 COL6A1 COL6A2 KIT COL6A3 COL1A2 YWHAZ HSP90B1 YWHAB IGF2 YWHAG CSF1R LAMA2 YWHAE
8.61638473405809e-05	21	202	2.92577924459113	Proteoglycans in cancer	http://www.genome.jp/kegg-bin/show_pathway?hsa05205	CD44 ANK1 ACTB MMP2 EZR MMP9 VTN PTPN6 MAPK14 FN1 FLNC CTSL FLNB THBS1 LUM IQGAP1 HSPG2 MSN COL1A2 IGF2 FLNA
0.000118008483318735	12	77	4.38595478595479	Bacterial invasion of epithelial cells	http://www.genome.jp/kegg-bin/show_pathway?hsa05100	VCL CDC42 ACTB ARPC3 ACTR3 FN1 ARPC1B ACTR2 CLTC ARPC2 SEPTIN2 ARPC4
0.000118008483318735	12	77	4.38595478595479	Arrhythmogenic right ventricular cardiomyopathy	http://www.genome.jp/kegg-bin/show_pathway?hsa05412	ITGA2B DSG2 ACTB ACTN2 DSP DSC2 CACNA2D1 LMNA JUP DES LAMA2 ACTN3
0.000174448675993429	16	135	3.33549154092364	Apoptosis	http://www.genome.jp/kegg-bin/show_pathway?hsa04210	CAPN1 BID ACTB CTSH LMNB1 CTSD TUBA4A CTSL CTSV LMNA CTSS SPTA1 TUBA1C CYCS SPTAN1
0.000265316789107455	13	97	3.77177039582538	Fc gamma R-mediated phagocytosis	http://www.genome.jp/kegg-bin/show_pathway?hsa04666	ARPC3 ACTR3 VASP RAC2 ARPC1B BIN1 ACTR2 MYO10 GSN ARPC5 ARPC2 CFL1 ARPC4
0.000306951504004194	29	363	2.24835560997177	Amyotrophic lateral sclerosis	http://www.genome.jp/kegg-bin/show_pathway?hsa05014	PSMB1 BID PSMA4 HSPA5 ACTB PSMA3 PSMA6 PSMA7 PSMA2 PSMD3 PFN1 MAPK14 CAT ANXA11 HNRNPA2B1 TUBA4A PSMA1 PSMB7 ANXA7 SOD1 PSMB6 PSMA5 PSMB4 VCP TUBA1C CYCS DCTN2 GPX3 ANG
0.000427485153791783	11	75	4.127670781893	PPAR signaling pathway	http://www.genome.jp/kegg-bin/show_pathway?hsa03320	ME1 PLTP APOC3 APOA1 FABP3 APOA2 FABP5 PLIN1 PLIN4 FABP4 ADIPOQ
0.000527888829834322	8	41	5.49135802469136	Ferroptosis	http://www.genome.jp/kegg-bin/show_pathway?hsa04216	TFRC FTL TF GSS CYBB FTH1 SLC3A2 PCBP1
0.000527888829834322	23	266	2.43343544045298	Parkinson disease	http://www.genome.jp/kegg-bin/show_pathway?hsa05012	PSMB1 PSMA4 HSPA5 PSMA3 PSMA6 PSMA7 PSMA2 PSMD3 PARK7 TUBA4A PSMA1 UBA1 TXN PSMB7 SOD1 PSMB6 PSMA5 RPS27A SNCA PSMB4 TUBA1C CYCS CALML5
0.000635348901090867	22	252	2.45694689398393	Endocytosis	http://www.genome.jp/kegg-bin/show_pathway?hsa04144	AP2B1 TFRC RAB7A CAPZB RAB10 HSPA8 ARPC3 ACAP2 ACTR3 CAPZA1 HSPA2 ARPC1B BIN1 ACTR2 CLTC ARPC5 ARPC2 RAB11B IGF2R CAPZA2 HSPA1B ARPC4
0.0010456573866029	10	70	4.02045855379189	Central carbon metabolism in cancer	http://www.genome.jp/kegg-bin/show_pathway?hsa05230	PKM LDHB SLC2A1 IDH1 KIT G6PD HK3 PGAM2 PGAM1 LDHA
0.00165489007287811	7	37	5.32439105772439	African trypanosomiasis	http://www.genome.jp/kegg-bin/show_pathway?hsa05143	ICAM1 KNG1 APOA1 VCAM1 HBA2 HBB HPR
0.00174640830232883	8	49	4.59480977576216	Malaria	http://www.genome.jp/kegg-bin/show_pathway?hsa05144	ICAM1 COMP THBS4 LRP1 THBS1 VCAM1 HBA2 HBB
0.00241622540666727	5	19	7.40610786224821	2-Oxocarboxylic acid metabolism	http://www.genome.jp/kegg-bin/show_pathway?hsa01210	CS GOT1 ACO1 IDH1 GPT
0.00252583492478349	11	93	3.32876675959113	IL-17 signaling pathway	http://www.genome.jp/kegg-bin/show_pathway?hsa04657	HSP90AA1 HSP90AB1 MMP9 MAPK14 MUC5B SRSF1 S100A8 S100A7 LCN2 S100A9 HSP90B1
0.00422912283806675	11	99	3.12702331961591	Hematopoietic cell lineage	http://www.genome.jp/kegg-bin/show_pathway?hsa04640	ITGA2B CD44 TFRC KIT ANPEP ITGAM CD14 GP5 CSF1R GP1BA CD55
0.00475975942853139	9	71	3.56744913928013	Adherens junction	http://www.genome.jp/kegg-bin/show_pathway?hsa04520	VCL CDC42 ACTN1 ACTB PTPN6 RAC2 IQGAP1 PTPRJ ACTN4
0.00478544550291745	31	475	1.83671474983756	Pathways of neurodegeneration	http://www.genome.jp/kegg-bin/show_pathway?hsa05022	PSMB1 CAPN1 BID PSMA4 HSPA5 PSMA3 PSMA6 PSMA7 PSMA2 PSMD3 MAPK14 PARK7 CAT TUBA4A PSMA1 UBA1 PSMB7 SOD1 APP PSMB6 PSMA5 RPS27A SNCA PSMB4 CYBB VCP TUBA1C CYCS DCTN2 CALML5 GPX3
0.0049324271053266	6	33	5.11694725028058	Fructose and mannose metabolism	http://www.genome.jp/kegg-bin/show_pathway?hsa00051	ALDOC TPI1 ALDOB ALDOA HK3 FBP1
0.0061690150891429	8	60	3.75242798353909	Viral myocarditis	http://www.genome.jp/kegg-bin/show_pathway?hsa05416	BID ACTB ICAM1 MYH7 RAC2 CYCS CD55 LAMA2
0.0062797093590704	7	47	4.19154189650644	Pyruvate metabolism	http://www.genome.jp/kegg-bin/show_pathway?hsa00620	MDH1 ME1 PKM ALDH2 LDHB MDH2 LDHA
0.00631356621885761	14	155	2.54196734368777	Biosynthesis of cofactors	http://www.genome.jp/kegg-bin/show_pathway?hsa01240	AK2 ADSS2 PKM GSS AK1 ALDH2 AKR1A1 GGH ALAD PDXK ALPL UGP2 ADSL NME2
0.00635203914077562	6	35	4.82455026455026	Starch and sucrose metabolism	http://www.genome.jp/kegg-bin/show_pathway?hsa00500	PYGM PGM1 PYGL HK3 GYG1 UGP2
0.00743452376060581	10	92	3.05904455179817	Salivary secretion	http://www.genome.jp/kegg-bin/show_pathway?hsa04970	LYZ CST3 CST4 BST1 MUC5B CST1 MUC7 CALML5 PRKG1 DMBT1
0.00780977087629589	13	142	2.57649104503565	Spinocerebellar ataxia	http://www.genome.jp/kegg-bin/show_pathway?hsa05017	PSMB1 PSMA4 PSMA3 PSMA6 PSMA7 PSMA2 PSMD3 PSMA1 PSMB7 PSMB6 PSMA5 PSMB4 CYCS
0.00815848135449005	6	37	4.56376376376376	Alanine, aspartate and glutamate metabolism	http://www.genome.jp/kegg-bin/show_pathway?hsa00250	ADSS2 NIT2 GOT1 ASL GPT ADSL
0.00824492873016961	7	50	3.94004938271605	Cysteine and methionine metabolism	http://www.genome.jp/kegg-bin/show_pathway?hsa00270	MDH1 GSS AHCY LDHB GOT1 MDH2 LDHA
0.00830372375404787	15	179	2.35836954272708	Tuberculosis	http://www.genome.jp/kegg-bin/show_pathway?hsa05152	LAMP2 BID RAB7A CORO1A MAPK14 CTSD C3 LBP CTSS ITGAM CD14 CYCS CALML5 LAMP1 LSP1
0.0109822618039987	16	203	2.21818402967828	Viral carcinogenesis	http://www.genome.jp/kegg-bin/show_pathway?hsa05203	PKM ACTN1 H2BC11 C3 YWHAH YWHAQ GSN YWHAZ HNRNPK YWHAB YWHAG H2BC13 H2BC12 YWHAE H4C9 ACTN4
0.0151321081842718	16	210	2.14424456202234	Rap1 signaling pathway	http://www.genome.jp/kegg-bin/show_pathway?hsa04015	ITGA2B CDC42 ACTB APBB1IP PFN1 MAPK14 VASP RAP1B RAC2 TLN1 THBS1 RALB KIT ITGAM CALML5 CSF1R
0.0152016948194479	12	137	2.46509867531765	Yersinia infection	http://www.genome.jp/kegg-bin/show_pathway?hsa05135	ACTB PYCARD ARPC3 MAPK14 ACTR3 FN1 RAC2 ARPC1B ACTR2 ARPC5 ARPC2 ARPC4
0.0153983995522124	5	30	4.69053497942387	Citrate cycle (TCA cycle)	http://www.genome.jp/kegg-bin/show_pathway?hsa00020	MDH1 ACO1 ACLY IDH1 MDH2
0.0153983995522124	5	30	4.69053497942387	Glyoxylate and dicarboxylate metabolism	http://www.genome.jp/kegg-bin/show_pathway?hsa00630	MDH1 CS CAT ACO1 MDH2
0.0153983995522124	9	87	2.91136653895275	Cardiac muscle contraction	http://www.genome.jp/kegg-bin/show_pathway?hsa04260	MYH7 MYL2 TNNC1 TPM1 TPM3 CACNA2D1 MYL3 TPM4 TPM2
0.0180239297333843	13	159	2.30101715971737	Necroptosis	http://www.genome.jp/kegg-bin/show_pathway?hsa04217	CAPN1 BID PYGM HSP90AA1 FTL HSP90AB1 PYGL PYCARD MACROH2A1 CYBB FTH1 PPIA H2AC4
0.0188593653462857	10	107	2.63020653051806	Glucagon signaling pathway	http://www.genome.jp/kegg-bin/show_pathway?hsa04922	PKM PYGM PYGL LDHB SLC2A1 PGAM2 FBP1 PGAM1 CALML5 LDHA
0.0206790206912391	11	126	2.45694689398393	Purine metabolism	http://www.genome.jp/kegg-bin/show_pathway?hsa00230	AK2 ADSS2 NT5C2 PGM1 ADA2 AK1 HPRT1 PNP ADSL NME2 GMPR2
0.0209067672108132	24	383	1.76354317764239	Alzheimer disease	http://www.genome.jp/kegg-bin/show_pathway?hsa05010	PSMB1 CAPN1 BID PSMA4 PSMA3 PSMA6 PSMA7 PSMA2 PSMD3 GAPDH LRP1 TUBA4A PSMA1 APOE PSMB7 APP PSMB6 PSMA5 SNCA PSMB4 CYBB TUBA1C CYCS CALML5
0.025762917710074	20	306	1.83942548212701	Huntington disease	http://www.genome.jp/kegg-bin/show_pathway?hsa05016	AP2B1 PSMB1 PSMA4 PSMA3 PSMA6 PSMA7 PSMA2 PSMD3 TUBA4A PSMA1 PSMB7 CLTC SOD1 PSMB6 PSMA5 PSMB4 TUBA1C CYCS DCTN2 GPX3
0.0258830503161989	4	22	5.11694725028058	Arginine biosynthesis	http://www.genome.jp/kegg-bin/show_pathway?hsa00220	ARG1 GOT1 ASL GPT
0.0273278741354256	6	49	3.44610733182162	Amino sugar and nucleotide sugar metabolism	http://www.genome.jp/kegg-bin/show_pathway?hsa00520	PGM1 NANS NAGK HK3 UGP2 HEXA
0.0273278741354256	5	35	4.02045855379189	Nicotinate and nicotinamide metabolism	http://www.genome.jp/kegg-bin/show_pathway?hsa00760	NT5C2 NAMPT BST1 PNP NAPRT
0.0293230923831438	4	23	4.89447128287708	Renin-angiotensin system	http://www.genome.jp/kegg-bin/show_pathway?hsa04614	CTSA PREP CTSG ANPEP
0.0323427336070565	6	51	3.31096586782861	Arginine and proline metabolism	http://www.genome.jp/kegg-bin/show_pathway?hsa00330	LAP3 CKM ALDH2 ARG1 GOT1 CKMT2
0.0323515895056054	9	100	2.53288888888889	AGE-RAGE signaling pathway in diabetic complications	http://www.genome.jp/kegg-bin/show_pathway?hsa04933	MMP2 ICAM1 SERPINE1 MAPK14 FN1 VCAM1 COL1A2 CYBB COL3A1
0.0328638108026653	5	37	3.80313646980314	Biosynthesis of nucleotide sugars	http://www.genome.jp/kegg-bin/show_pathway?hsa01250	PGM1 NANS NAGK HK3 UGP2
0.0379659324263354	9	103	2.45911542610572	Protein digestion and absorption	http://www.genome.jp/kegg-bin/show_pathway?hsa04974	CPB2 COL6A1 COL6A2 COL6A3 COL1A2 SLC3A2 COL3A1 DPP4 PRSS1
0.0405783123476356	11	141	2.1955695648367	Alcoholic liver disease	http://www.genome.jp/kegg-bin/show_pathway?hsa04936	C5 ALDH2 MAPK14 C3 LBP C1QC CD14 C1QA ADIPOQ C2 C4A
0.0489396637949045	3	15	5.62864197530864	Thiamine metabolism	http://www.genome.jp/kegg-bin/show_pathway?hsa00730	AK2 AK1 ALPL
0.0489396637949045	29	530	1.53991148381085	Pathways in cancer	http://www.genome.jp/kegg-bin/show_pathway?hsa05200	ITGA2B BID CDC42 GNB1 HSP90AA1 GSTP1 MMP2 LAMB1 HSP90AB1 MMP9 ELOB KNG1 FN1 SLC2A1 RAC2 LAMC1 TPM3 RALB GSTO1 KIT HSP90B1 IGF2 CYCS JUP CALML5 F2 CSF1R LAMA2 GSTM2
0.0496616348420112	20	331	1.70049606504793	Human papillomavirus infection	http://www.genome.jp/kegg-bin/show_pathway?hsa05165	ITGA2B TNC PKM LAMB1 COMP SLC9A3R1 VTN VWF THBS4 FN1 SPP1 ATP6V1E1 LAMC1 THBS1 COL6A1 COL6A2 COL6A3 COL1A2 BCAP31 LAMA2
0.0551672460953979	7	75	2.62669958847737	Thyroid hormone synthesis	http://www.genome.jp/kegg-bin/show_pathway?hsa04918	HSPA5 GSR TTR SERPINA7 ALB HSP90B1 GPX3
0.0584699882812934	11	150	2.0638353909465	Adrenergic signaling in cardiomyocytes	http://www.genome.jp/kegg-bin/show_pathway?hsa04261	MYH7 MYL2 MAPK14 TNNC1 TPM1 TPM3 CACNA2D1 MYL3 TPM4 CALML5 TPM2
0.0610049880356955	5	44	3.19809203142536	Vasopressin-regulated water reabsorption	http://www.genome.jp/kegg-bin/show_pathway?hsa04962	DYNLL1 ARHGDIB ARHGDIA DCTN2 RAB11B
0.0653528766026874	3	17	4.96644880174292	Nitrogen metabolism	http://www.genome.jp/kegg-bin/show_pathway?hsa00910	CA2 CA1 CA3
0.0683735006241379	7	79	2.49370214095952	Drug metabolism	http://www.genome.jp/kegg-bin/show_pathway?hsa00983	MPO TYMP GSTP1 GSTO1 HPRT1 GSTM2 NME2
0.0747696746275117	3	18	4.69053497942387	Other glycan degradation	http://www.genome.jp/kegg-bin/show_pathway?hsa00511	FUCA2 FUCA1 HEXA
0.136379147334183	6	73	2.31314053779807	P53 signaling pathway	http://www.genome.jp/kegg-bin/show_pathway?hsa04115	BID SERPINE1 THBS1 IGFBP3 CYCS SFN
0.137059743010888	9	132	1.91885521885522	Spliceosome	http://www.genome.jp/kegg-bin/show_pathway?hsa03040	HNRNPM HSPA8 HSPA2 SRSF1 HNRNPU SRSF2 HNRNPK PCBP1 HSPA1B
0.137059743010888	8	112	2.01022927689594	Toxoplasmosis	http://www.genome.jp/kegg-bin/show_pathway?hsa05145	LAMB1 HSPA8 MAPK14 HSPA2 LAMC1 CYCS LAMA2 HSPA1B
0.152177991228477	3	24	3.5179012345679	Vitamin digestion and absorption	http://www.genome.jp/kegg-bin/show_pathway?hsa04977	APOA4 APOA1 BTD
0.152477484147921	4	40	2.81432098765432	Glycine, serine and threonine metabolism	http://www.genome.jp/kegg-bin/show_pathway?hsa00260	AOC3 PGAM2 PGAM1 BPGM
0.152477484147921	6	76	2.22183235867446	Leishmaniasis	http://www.genome.jp/kegg-bin/show_pathway?hsa05140	PTPN6 MAPK14 C3 EEF1A1 CYBB ITGAM
0.161424874061113	4	41	2.74567901234568	Bladder cancer	http://www.genome.jp/kegg-bin/show_pathway?hsa05219	TYMP MMP2 MMP9 THBS1
0.166761711296395	12	203	1.66363802225871	Diabetic cardiomyopathy	http://www.genome.jp/kegg-bin/show_pathway?hsa05415	MMP2 MMP9 GSR GAPDH MAPK14 SLC2A1 CTSD RAC2 G6PD COL1A2 CYBB COL3A1
0.17075843676734	16	294	1.53160325858739	MAPK signaling pathway	http://www.genome.jp/kegg-bin/show_pathway?hsa04010	HSPB1 HSPA8 MAPK14 HSPA2 RAP1B RAC2 FLNC FLNB CACNA2D1 KIT IGF2 CD14 CSF1R IL1RAP FLNA HSPA1B
0.188195108875256	5	62	2.26961369972123	Longevity regulating pathway	http://www.genome.jp/kegg-bin/show_pathway?hsa04213	HSPA8 CAT HSPA2 SOD1 HSPA1B
0.188195108875256	3	27	3.12702331961591	Collecting duct acid secretion	http://www.genome.jp/kegg-bin/show_pathway?hsa04966	SLC4A1 CA2 ATP6V1E1
0.188195108875256	7	101	1.95051949639408	Chagas disease	http://www.genome.jp/kegg-bin/show_pathway?hsa05142	SERPINE1 MAPK14 KNG1 C3 C1QC C1QA CALR
0.194271052623201	12	210	1.60818342151675	Human immunodeficiency virus 1 infection	http://www.genome.jp/kegg-bin/show_pathway?hsa05170	BID GNB1 ELOB MAPK14 RAC2 AP1G1 PDIA3 CYCS CFL1 CALML5 CALR B2M

## Sheet: Table S3 string_kmeans_cluster
string_kmeans_clusters
#clustering method	cluster number	cluster color	gene count	protein name	protein identifier	protein description
kmeans	1	Red	281	ACAP2	9606.ENSP00000324287	Arf-GAP with coiled-coil, ANK repeat and PH domain-containing protein 2; GTPase-activating protein (GAP) for ADP ribosylation factor 6 (ARF6); Ankyrin repeat domain containing
kmeans	1	Red	281	ACLY	9606.ENSP00000253792	ATP-citrate synthase; ATP-citrate synthase is the primary enzyme responsible for the synthesis of cytosolic acetyl-CoA in many tissues. Has a central role in de novo lipid synthesis. In nervous tissue it may be involved in the biosynthesis of acetylcholine; In the N-terminal section; belongs to the succinate/malate CoA ligase beta subunit family
kmeans	1	Red	281	ACO1	9606.ENSP00000309477	Cytoplasmic aconitate hydratase; Iron sensor. Binds a 4Fe-4S cluster and functions as aconitase when cellular iron levels are high. Functions as mRNA binding protein that regulates uptake, sequestration and utilization of iron when cellular iron levels are low. Binds to iron-responsive elements (IRES) in target mRNA species when iron levels are low. Binding of a 4Fe-4S cluster precludes RNA bindi…
kmeans	1	Red	281	ACTB	9606.ENSP00000349960	Actin, cytoplasmic 1; Actins are highly conserved proteins that are involved in various types of cell motility and are ubiquitously expressed in all eukaryotic cells
kmeans	1	Red	281	ADSL	9606.ENSP00000485525	Adenylosuccinate lyase; Catalyzes two non-sequential steps in de novo AMP synthesis: converts (S)-2-(5-amino-1-(5-phospho-D- ribosyl)imidazole-4-carboxamido)succinate (SAICAR) to fumarate plus 5-amino-1-(5-phospho-D-ribosyl)imidazole-4-carboxamide, and thereby also contributes to de novo IMP synthesis, and converts succinyladenosine monophosphate (SAMP) to AMP and fumarate; Belongs to the lyase 1…
kmeans	1	Red	281	ADSS	9606.ENSP00000355493	Adenylosuccinate synthetase isozyme 2; Plays an important role in the de novo pathway and in the salvage pathway of purine nucleotide biosynthesis. Catalyzes the first committed step in the biosynthesis of AMP from IMP
kmeans	1	Red	281	AFP	9606.ENSP00000379138	Alpha-fetoprotein; Binds copper, nickel, and fatty acids as well as, and bilirubin less well than, serum albumin. Only a small percentage (less than 2%) of the human AFP shows estrogen-binding properties; Belongs to the ALB/AFP/VDB family
kmeans	1	Red	281	AHCY	9606.ENSP00000217426	Adenosylhomocysteinase; Adenosylhomocysteine is a competitive inhibitor of S- adenosyl-L-methionine-dependent methyl transferase reactions; therefore adenosylhomocysteinase may play a key role in the control of methylations via regulation of the intracellular concentration of adenosylhomocysteine
kmeans	1	Red	281	AK1	9606.ENSP00000362271	Adenylate kinase isoenzyme 1; Catalyzes the reversible transfer of the terminal phosphate group between ATP and AMP. Also displays broad nucleoside diphosphate kinase activity. Plays an important role in cellular energy homeostasis and in adenine nucleotide metabolism; Belongs to the adenylate kinase family. AK1 subfamily
kmeans	1	Red	281	AK2	9606.ENSP00000346921	Adenylate kinase 2, mitochondrial; Catalyzes the reversible transfer of the terminal phosphate group between ATP and AMP. Plays an important role in cellular energy homeostasis and in adenine nucleotide metabolism. Adenylate kinase activity is critical for regulation of the phosphate utilization and the AMP de novo biosynthesis pathways. Plays a key role in hematopoiesis
kmeans	1	Red	281	AKR1A1	9606.ENSP00000361140	Alcohol dehydrogenase [NADP(+)]; Catalyzes the NADPH-dependent reduction of a variety of aromatic and aliphatic aldehydes to their corresponding alcohols. Catalyzes the reduction of mevaldate to mevalonic acid and of glyceraldehyde to glycerol. Has broad substrate specificity. In vitro substrates include succinic semialdehyde, 4- nitrobenzaldehyde, 1,2-naphthoquinone, methylglyoxal, and D- glucur…
kmeans	1	Red	281	ALDH1A1	9606.ENSP00000297785	Aldehyde dehydrogenase 1 family member a1; Retinal dehydrogenase 1; Can convert/oxidize retinaldehyde to retinoic acid. Binds free retinal and cellular retinol-binding protein-bound retinal (By similarity). May have a broader specificity and oxidize other aldehydes in vivo
kmeans	1	Red	281	ALDH2	9606.ENSP00000261733	Aldehyde dehydrogenase, mitochondrial; Aldehyde dehydrogenase 2 family member; Belongs to the aldehyde dehydrogenase family
kmeans	1	Red	281	ALDH9A1	9606.ENSP00000346827	4-trimethylaminobutyraldehyde dehydrogenase; Converts gamma-trimethylaminobutyraldehyde into gamma- butyrobetaine. Catalyzes the irreversible oxidation of a broad range of aldehydes to the corresponding acids in an NAD-dependent reaction
kmeans	1	Red	281	ALDOA	9606.ENSP00000378669	Fructose-bisphosphate aldolase A; Plays a key role in glycolysis and gluconeogenesis. In addition, may also function as scaffolding protein (By similarity); Belongs to the class I fructose-bisphosphate aldolase family
kmeans	1	Red	281	ALDOB	9606.ENSP00000363988	Fructose-bisphosphate aldolase, class i; Belongs to the class I fructose-bisphosphate aldolase family
kmeans	1	Red	281	ALDOC	9606.ENSP00000226253	Fructose-bisphosphate aldolase, class i; Belongs to the class I fructose-bisphosphate aldolase family
kmeans	1	Red	281	ALPL	9606.ENSP00000363973	Alkaline phosphatase, tissue-nonspecific isozyme; This isozyme may play a role in skeletal mineralization; Belongs to the alkaline phosphatase family
kmeans	1	Red	281	ANP32A	9606.ENSP00000417864	Acidic leucine-rich nuclear phosphoprotein 32 family member A; Implicated in a number of cellular processes, including proliferation, differentiation, caspase-dependent and caspase- independent apoptosis, suppression of transformation (tumor suppressor), inhibition of protein phosphatase 2A, regulation of mRNA trafficking and stability in association with ELAVL1, and inhibition of acetyltransfera…
kmeans	1	Red	281	ANP32B	9606.ENSP00000345848	Acidic leucine-rich nuclear phosphoprotein 32 family member B; Multifunctional protein working as a cell cycle progression factor as well as a cell survival factor. Required for the progression from the G1 to the S phase. Anti-apoptotic protein which functions as a caspase-3 inhibitor. Has no phosphatase 2A (PP2A) inhibitor activity (By similarity). Exhibits histone chaperone properties, stimulat…
kmeans	1	Red	281	ANXA2	9606.ENSP00000346032	Annexin A2; Calcium-regulated membrane-binding protein whose affinity for calcium is greatly enhanced by anionic phospholipids. It binds two calcium ions with high affinity. May be involved in heat-stress response. Inhibits PCSK9-enhanced LDLR degradation, probably reduces PCSK9 protein levels via a translational mechanism but also competes with LDLR for binding with PCSK9; Belongs to the annexin…
kmeans	1	Red	281	ANXA5	9606.ENSP00000296511	Annexin A5; This protein is an anticoagulant protein that acts as an indirect inhibitor of the thromboplastin-specific complex, which is involved in the blood coagulation cascade; Annexins
kmeans	1	Red	281	ANXA6	9606.ENSP00000346550	Annexin A6; May associate with CD21. May regulate the release of Ca(2+) from intracellular stores; Annexins
kmeans	1	Red	281	ANXA7	9606.ENSP00000362010	Annexin A7; Calcium/phospholipid-binding protein which promotes membrane fusion and is involved in exocytosis; Belongs to the annexin family
kmeans	1	Red	281	ANXA8	9606.ENSP00000478026	Annexin A8; Annexins
kmeans	1	Red	281	APEH	9606.ENSP00000296456	Acylamino-acid-releasing enzyme; This enzyme catalyzes the hydrolysis of the N-terminal peptide bond of an N-acetylated peptide to generate an N- acetylated amino acid and a peptide with a free N-terminus. It preferentially cleaves off Ac-Ala, Ac-Met and Ac-Ser; Belongs to the peptidase S9C family
kmeans	1	Red	281	APEX1	9606.ENSP00000216714	DNA-(apurinic or apyrimidinic site) lyase; Multifunctional protein that plays a central role in the cellular response to oxidative stress. The two major activities of APEX1 in DNA repair and redox regulation of transcriptional factors. Functions as a apurinic/apyrimidinic (AP) endodeoxyribonuclease in the DNA base excision repair (BER) pathway of DNA lesions induced by oxidative and alkylating ag…
kmeans	1	Red	281	APMAP	9606.ENSP00000217456	Adipocyte plasma membrane-associated protein; Exhibits strong arylesterase activity with beta-naphthyl acetate and phenyl acetate. May play a role in adipocyte differentiation; Belongs to the strictosidine synthase family
kmeans	1	Red	281	APP	9606.ENSP00000284981	Amyloid-beta A4 protein; N-APP binds TNFRSF21 triggering caspase activation and degeneration of both neuronal cell bodies (via caspase-3) and axons (via caspase-6); Endogenous ligands
kmeans	1	Red	281	ARG1	9606.ENSP00000349446	Arginase-1; Key element of the urea cycle converting L-arginine to urea and L-ornithine, which is further metabolized into metabolites proline and polyamides that drive collagen synthesis and bioenergetic pathways critical for cell proliferation, respectively; the urea cycle takes place primarily in the liver and, to a lesser extent, in the kidneys
kmeans	1	Red	281	ARHGDIA	9606.ENSP00000269321	Rho GDP-dissociation inhibitor 1; Controls Rho proteins homeostasis. Regulates the GDP/GTP exchange reaction of the Rho proteins by inhibiting the dissociation of GDP from them, and the subsequent binding of GTP to them. Retains Rho proteins such as CDC42, RAC1 and RHOA in an inactive cytosolic pool, regulating their stability and protecting them from degradation. Actively involved in the recycli…
kmeans	1	Red	281	ARHGDIB	9606.ENSP00000228945	Rho GDP-dissociation inhibitor 2; Regulates the GDP/GTP exchange reaction of the Rho proteins by inhibiting the dissociation of GDP from them, and the subsequent binding of GTP to them. Regulates reorganization of the actin cytoskeleton mediated by Rho family members
kmeans	1	Red	281	ASL	9606.ENSP00000307188	Argininosuccinate lyase
kmeans	1	Red	281	BAZ1A	9606.ENSP00000353458	Bromodomain adjacent to zinc finger domain protein 1A; Component of the ACF complex, an ATP-dependent chromatin remodeling complex, that regulates spacing of nucleosomes using ATP to generate evenly spaced nucleosomes along the chromatin. The ATPase activity of the complex is regulated by the length of flanking DNA. Also involved in facilitating the DNA replication process. BAZ1A is the accessory…
kmeans	1	Red	281	BIN2	9606.ENSP00000267012	Bridging integrator 2; Promotes cell motility and migration, probably via its interaction with the cell membrane and with podosome proteins that mediate interaction with the cytoskeleton. Modulates membrane curvature and mediates membrane tubulation. Plays a role in podosome formation. Inhibits phagocytosis; N-BAR domain containing
kmeans	1	Red	281	BPGM	9606.ENSP00000376840	Bisphosphoglycerate mutase; Plays a major role in regulating hemoglobin oxygen affinity by controlling the levels of its allosteric effector 2,3- bisphosphoglycerate (2,3-BPG). Also exhibits mutase (EC 5.4.2.1) activity; Belongs to the phosphoglycerate mutase family. BPG- dependent PGAM subfamily
kmeans	1	Red	281	C6orf58	9606.ENSP00000328069	Chromosome 6 open reading frame 58; Protein LEG1 homolog; May be involved in early liver development
kmeans	1	Red	281	CALR	9606.ENSP00000320866	Calreticulin; Calcium-binding chaperone that promotes folding, oligomeric assembly and quality control in the endoplasmic reticulum (ER) via the calreticulin/calnexin cycle. This lectin interacts transiently with almost all of the monoglucosylated glycoproteins that are synthesized in the ER. Interacts with the DNA-binding domain of NR3C1 and mediates its nuclear export. Involved in maternal gene…
kmeans	1	Red	281	CAMP	9606.ENSP00000296435	Cathelicidin antimicrobial peptide; Binds to bacterial lipopolysaccharides (LPS), has antibacterial activity; Endogenous ligands
kmeans	1	Red	281	CAPG	9606.ENSP00000263867	Macrophage-capping protein; Calcium-sensitive protein which reversibly blocks the barbed ends of actin filaments but does not sever preformed actin filaments. May play an important role in macrophage function. May play a role in regulating cytoplasmic and/or nuclear structures through potential interactions with actin. May bind DNA; Gelsolin/villins
kmeans	1	Red	281	CAPZA1	9606.ENSP00000263168	Capping actin protein of muscle z-line alpha subunit 1; F-actin-capping protein subunit alpha-1; F-actin-capping proteins bind in a Ca(2+)-independent manner to the fast growing ends of actin filaments (barbed end) thereby blocking the exchange of subunits at these ends. Unlike other capping proteins (such as gelsolin and severin), these proteins do not sever actin filaments. May play a role in t…
kmeans	1	Red	281	CCT6A	9606.ENSP00000275603	T-complex protein 1 subunit zeta; Molecular chaperone; assists the folding of proteins upon ATP hydrolysis. Known to play a role, in vitro, in the folding of actin and tubulin; Belongs to the TCP-1 chaperonin family
kmeans	1	Red	281	CDA	9606.ENSP00000364212	Cytidine deaminase; This enzyme scavenges exogenous and endogenous cytidine and 2'-deoxycytidine for UMP synthesis
kmeans	1	Red	281	CDC37	9606.ENSP00000222005	Cell division cycle 37, hsp90 cochaperone; Hsp90 co-chaperone Cdc37; Co-chaperone that binds to numerous kinases and promotes their interaction with the Hsp90 complex, resulting in stabilization and promotion of their activity. Inhibits HSP90AA1 ATPase activity
kmeans	1	Red	281	CECR1	9606.ENSP00000382731	Adenosine deaminase cecr1; Adenosine deaminase 2; Adenosine deaminase that may contribute to the degradation of extracellular adenosine, a signaling molecule that controls a variety of cellular responses. Requires elevated adenosine levels for optimal enzyme activity. Binds to cell surfaces via proteoglycans and may play a role in the regulation of cell proliferation and differentiation, independ…
kmeans	1	Red	281	CKMT2	9606.ENSP00000404203	Creatine kinase S-type, mitochondrial; Reversibly catalyzes the transfer of phosphate between ATP and various phosphogens (e.g. creatine phosphate). Creatine kinase isoenzymes play a central role in energy transduction in tissues with large, fluctuating energy demands, such as skeletal muscle, heart, brain and spermatozoa; Belongs to the ATP:guanido phosphotransferase family
kmeans	1	Red	281	CLIC1	9606.ENSP00000364935	Chloride intracellular channel protein 1; Can insert into membranes and form chloride ion channels. Channel activity depends on the pH. Membrane insertion seems to be redox-regulated and may occur only under oxydizing conditions. Involved in regulation of the cell cycle
kmeans	1	Red	281	CLIC4	9606.ENSP00000363500	Chloride intracellular channel protein 4; Can insert into membranes and form poorly selective ion channels that may also transport chloride ions. Channel activity depends on the pH. Membrane insertion seems to be redox-regulated and may occur only under oxydizing conditions. Promotes cell- surface expression of HRH3. Has alternate cellular functions like a potential role in angiogenesis or in mai…
kmeans	1	Red	281	CLTC	9606.ENSP00000479606	Clathrin heavy chain 1; Clathrin is the major protein of the polyhedral coat of coated pits and vesicles. Two different adapter protein complexes link the clathrin lattice either to the plasma membrane or to the trans-Golgi network. Acts as component of the TACC3/ch- TOG/clathrin complex proposed to contribute to stabilization of kinetochore fibers of the mitotic spindle by acting as inter- micro…
kmeans	1	Red	281	COL1A1	9606.ENSP00000225964	Collagen alpha-1(I) chain; Type I collagen is a member of group I collagen (fibrillar forming collagen); Collagens
kmeans	1	Red	281	COL1A2	9606.ENSP00000297268	Collagen alpha-2(I) chain; Type I collagen is a member of group I collagen (fibrillar forming collagen); Belongs to the fibrillar collagen family
kmeans	1	Red	281	COL3A1	9606.ENSP00000304408	Collagen alpha-1(III) chain; Collagen type III occurs in most soft connective tissues along with type I collagen. Involved in regulation of cortical development. Is the major ligand of ADGRG1 in the developing brain and binding to ADGRG1 inhibits neuronal migration and activates the RhoA pathway by coupling ADGRG1 to GNA13 and possibly GNA12
kmeans	1	Red	281	CORO1A	9606.ENSP00000219150	Coronin-1A; May be a crucial component of the cytoskeleton of highly motile cells, functioning both in the invagination of large pieces of plasma membrane, as well as in forming protrusions of the plasma membrane involved in cell locomotion. In mycobacteria- infected cells, its retention on the phagosomal membrane prevents fusion between phagosomes and lysosomes; Belongs to the WD repeat coronin …
kmeans	1	Red	281	CS	9606.ENSP00000342056	Citrate synthase, mitochondrial; Citrate synthase
kmeans	1	Red	281	CSF1R	9606.ENSP00000286301	Macrophage colony-stimulating factor 1 receptor; Tyrosine-protein kinase that acts as cell-surface receptor for CSF1 and IL34 and plays an essential role in the regulation of survival, proliferation and differentiation of hematopoietic precursor cells, especially mononuclear phagocytes, such as macrophages and monocytes. Promotes the release of proinflammatory chemokines in response to IL34 and C…
kmeans	1	Red	281	CYBB	9606.ENSP00000367851	Cytochrome b-245 heavy chain; Critical component of the membrane-bound oxidase of phagocytes that generates superoxide. It is the terminal component of a respiratory chain that transfers single electrons from cytoplasmic NADPH across the plasma membrane to molecular oxygen on the exterior. Also functions as a voltage-gated proton channel that mediates the H(+) currents of resting phagocytes. It p…
kmeans	1	Red	281	DDT	9606.ENSP00000381386	D-dopachrome decarboxylase; Tautomerization of D-dopachrome with decarboxylation to give 5,6-dihydroxyindole (DHI)
kmeans	1	Red	281	DPP3	9606.ENSP00000353701	Dipeptidyl-peptidase iii; Dipeptidyl peptidase 3; Cleaves and degrades bioactive peptides, including angiotensin, Leu-enkephalin and Met-enkephalin. Also cleaves Arg-Arg-beta-naphthylamide (in vitro); Belongs to the peptidase M49 family
kmeans	1	Red	281	DYNLL1	9606.ENSP00000376297	Dynein light chain 1, cytoplasmic; Acts as one of several non-catalytic accessory components of the cytoplasmic dynein 1 complex that are thought to be involved in linking dynein to cargos and to adapter proteins that regulate dynein function. Cytoplasmic dynein 1 acts as a motor for the intracellular retrograde motility of vesicles and organelles along microtubules. May play a role in changing o…
kmeans	1	Red	281	EEF1A1	9606.ENSP00000339063	Elongation factor 1-alpha 1; This protein promotes the GTP-dependent binding of aminoacyl-tRNA to the A-site of ribosomes during protein biosynthesis. With PARP1 and TXK, forms a complex that acts as a T helper 1 (Th1) cell-specific transcription factor and binds the promoter of IFN-gamma to directly regulate its transcription, and is thus involved importantly in Th1 cytokine production; Belongs …
kmeans	1	Red	281	EEF1G	9606.ENSP00000331901	Eukaryotic translation elongation factor 1 gamma; Elongation factor 1-gamma; Probably plays a role in anchoring the complex to other cellular components
kmeans	1	Red	281	EEF2	9606.ENSP00000307940	Elongation factor 2; Catalyzes the GTP-dependent ribosomal translocation step during translation elongation. During this step, the ribosome changes from the pre-translocational (PRE) to the post- translocational (POST) state as the newly formed A-site-bound peptidyl-tRNA and P-site-bound deacylated tRNA move to the P and E sites, respectively. Catalyzes the coordinated movement of the two tRNA mo…
kmeans	1	Red	281	EIF5A	9606.ENSP00000336702	Eukaryotic translation initiation factor 5A-1; mRNA-binding protein involved in translation elongation. Has an important function at the level of mRNA turnover, probably acting downstream of decapping. Involved in actin dynamics and cell cycle progression, mRNA decay and probably in a pathway involved in stress response and maintenance of cell wall integrity. With syntenin SDCBP, functions as a r…
kmeans	1	Red	281	ENO1	9606.ENSP00000234590	Alpha-enolase; Multifunctional enzyme that, as well as its role in glycolysis, plays a part in various processes such as growth control, hypoxia tolerance and allergic responses. May also function in the intravascular and pericellular fibrinolytic system due to its ability to serve as a receptor and activator of plasminogen on the cell surface of several cell-types such as leukocytes and neurons.…
kmeans	1	Red	281	ENO2	9606.ENSP00000437402	Gamma-enolase; Has neurotrophic and neuroprotective properties on a broad spectrum of central nervous system (CNS) neurons. Binds, in a calcium-dependent manner, to cultured neocortical neurons and promotes cell survival (By similarity); Enolases
kmeans	1	Red	281	ENO3	9606.ENSP00000324105	Beta-enolase; Appears to have a function in striated muscle development and regeneration; Belongs to the enolase family
kmeans	1	Red	281	ENSP00000431536	9606.ENSP00000431536	Uncharacterized protein
kmeans	1	Red	281	ERP44	9606.ENSP00000262455	Endoplasmic reticulum resident protein 44; Mediates thiol-dependent retention in the early secretory pathway, forming mixed disulfides with substrate proteins through its conserved CRFS motif. Inhibits the calcium channel activity of ITPR1. May have a role in the control of oxidative protein folding in the endoplasmic reticulum. Required to retain ERO1A and ERO1B in the endoplasmic reticulum
kmeans	1	Red	281	FABP4	9606.ENSP00000256104	Fatty acid-binding protein, adipocyte; Lipid transport protein in adipocytes. Binds both long chain fatty acids and retinoic acid. Delivers long-chain fatty acids and retinoic acid to their cognate receptors in the nucleus (By similarity); Belongs to the calycin superfamily. Fatty-acid binding protein (FABP) family
kmeans	1	Red	281	FABP5	9606.ENSP00000297258	Fatty acid-binding protein, epidermal; High specificity for fatty acids. Highest affinity for C18 chain length. Decreasing the chain length or introducing double bonds reduces the affinity. May be involved in keratinocyte differentiation; Belongs to the calycin superfamily. Fatty-acid binding protein (FABP) family
kmeans	1	Red	281	FAM213A	9606.ENSP00000482445	Redox-regulatory protein FAM213A; Involved in redox regulation of the cell. Acts as an antioxidant. Inhibits TNFSF11-induced NFKB1 and JUN activation and osteoclast differentiation. May affect bone resorption and help to maintain bone mass. Acts as a negative regulator of macrophage-mediated inflammation by inhibiting macrophage production of inflammatory cytokines, probably through suppression o…
kmeans	1	Red	281	FBP1	9606.ENSP00000408025	Fructose-1,6-bisphosphatase 1; Catalyzes the hydrolysis of fructose 1,6-bisphosphate to fructose 6-phosphate in the presence of divalent cations, acting as a rate-limiting enzyme in gluconeogenesis. Plays a role in regulating glucose sensing and insulin secretion of pancreatic beta-cells. Appears to modulate glycerol gluconeogenesis in liver. Important regulator of appetite and adiposity; increas…
kmeans	1	Red	281	FDPS	9606.ENSP00000349078	Farnesyl pyrophosphate synthase; Key enzyme in isoprenoid biosynthesis which catalyzes the formation of farnesyl diphosphate (FPP), a precursor for several classes of essential metabolites including sterols, dolichols, carotenoids, and ubiquinones. FPP also serves as substrate for protein farnesylation and geranylgeranylation. Catalyzes the sequential condensation of isopentenyl pyrophosphate wit…
kmeans	1	Red	281	FEN1	9606.ENSP00000305480	Flap endonuclease 1; Structure-specific nuclease with 5'-flap endonuclease and 5'-3' exonuclease activities involved in DNA replication and repair. During DNA replication, cleaves the 5'-overhanging flap structure that is generated by displacement synthesis when DNA polymerase encounters the 5'-end of a downstream Okazaki fragment. It enters the flap from the 5'-end and then tracks to cleave the …
kmeans	1	Red	281	FERMT3	9606.ENSP00000279227	Fermitin family homolog 3; Plays a central role in cell adhesion in hematopoietic cells. Acts by activating the integrin beta-1-3 (ITGB1, ITGB2 and ITGB3) (By similarity). Required for integrin-mediated platelet adhesion and leukocyte adhesion to endothelial cells. Required for activation of integrin beta-2 (ITGB2) in polymorphonuclear granulocytes (PMNs) (By similarity); Belongs to the kindlin f…
kmeans	1	Red	281	FKBP4	9606.ENSP00000001008	Peptidyl-prolyl cis-trans isomerase FKBP4; Immunophilin protein with PPIase and co-chaperone activities. Component of steroid receptors heterocomplexes through interaction with heat-shock protein 90 (HSP90). May play a role in the intracellular trafficking of heterooligomeric forms of steroid hormone receptors between cytoplasm and nuclear compartments. The isomerase activity controls neuronal gr…
kmeans	1	Red	281	FN1	9606.ENSP00000346839	Fibronectin 1; Fibronectin type III domain containing; Endogenous ligands
kmeans	1	Red	281	FTL	9606.ENSP00000366525	Ferritin light chain; Stores iron in a soluble, non-toxic, readily available form. Important for iron homeostasis. Iron is taken up in the ferrous form and deposited as ferric hydroxides after oxidation. Also plays a role in delivery of iron to cells. Mediates iron uptake in capsule cells of the developing kidney (By similarity); Belongs to the ferritin family
kmeans	1	Red	281	FUCA1	9606.ENSP00000363603	Tissue alpha-L-fucosidase; Alpha-L-fucosidase is responsible for hydrolyzing the alpha-1,6-linked fucose joined to the reducing-end N- acetylglucosamine of the carbohydrate moieties of glycoproteins
kmeans	1	Red	281	G6PD	9606.ENSP00000377192	Glucose-6-phosphate 1-dehydrogenase; Catalyzes the rate-limiting step of the oxidative pentose-phosphate pathway, which represents a route for the dissimilation of carbohydrates besides glycolysis. The main function of this enzyme is to provide reducing power (NADPH) and pentose phosphates for fatty acid and nucleic acid synthesis; Belongs to the glucose-6-phosphate dehydrogenase family
kmeans	1	Red	281	GAPDH	9606.ENSP00000229239	Glyceraldehyde-3-phosphate dehydrogenase; Has both glyceraldehyde-3-phosphate dehydrogenase and nitrosylase activities, thereby playing a role in glycolysis and nuclear functions, respectively. Participates in nuclear events including transcription, RNA transport, DNA replication and apoptosis. Nuclear functions are probably due to the nitrosylase activity that mediates cysteine S-nitrosylation o…
kmeans	1	Red	281	GARS	9606.ENSP00000373918	Glycine--tRNA ligase; Catalyzes the ligation of glycine to the 3'-end of its cognate tRNA. Also produces diadenosine tetraphosphate (Ap4A), a universal pleiotropic signaling molecule needed for cell regulation pathways, by direct condensation of 2 ATPs; Belongs to the class-II aminoacyl-tRNA synthetase family
kmeans	1	Red	281	GCA	9606.ENSP00000394842	Grancalcin; Calcium-binding protein that may play a role in the adhesion of neutrophils to fibronectin. May play a role in the formation of focal adhesions; EF-hand domain containing
kmeans	1	Red	281	GLOD4	9606.ENSP00000301329	Glyoxalase domain containing 4
kmeans	1	Red	281	GLRX	9606.ENSP00000369314	Glutaredoxin-1; Has a glutathione-disulfide oxidoreductase activity in the presence of NADPH and glutathione reductase. Reduces low molecular weight disulfides and proteins; Glutaredoxin domain containing
kmeans	1	Red	281	GMFG	9606.ENSP00000472249	Glia maturation factor gamma
kmeans	1	Red	281	GMPR2	9606.ENSP00000454038	Guanosine monophosphate reductase 2; GMP reductase 2; Catalyzes the irreversible NADPH-dependent deamination of GMP to IMP. It functions in the conversion of nucleobase, nucleoside and nucleotide derivatives of G to A nucleotides, and in maintaining the intracellular balance of A and G nucleotides. Plays a role in modulating cellular differentiation
kmeans	1	Red	281	GNB1	9606.ENSP00000481878	Guanine nucleotide-binding protein G(I)/G(S)/G(T) subunit beta-1; Guanine nucleotide-binding proteins (G proteins) are involved as a modulator or transducer in various transmembrane signaling systems. The beta and gamma chains are required for the GTPase activity, for replacement of GDP by GTP, and for G protein- effector interaction
kmeans	1	Red	281	GPD1	9606.ENSP00000301149	Glycerol-3-phosphate dehydrogenase [NAD(+)], cytoplasmic; Glycerol-3-phosphate dehydrogenase 1; Belongs to the NAD-dependent glycerol-3-phosphate dehydrogenase family
kmeans	1	Red	281	GPI	9606.ENSP00000405573	Glucose-6-phosphate isomerase; Besides it's role as a glycolytic enzyme, mammalian GPI can function as a tumor-secreted cytokine and an angiogenic factor (AMF) that stimulates endothelial cell motility. GPI is also a neurotrophic factor (Neuroleukin) for spinal and sensory neurons
kmeans	1	Red	281	GSTP1	9606.ENSP00000381607	Glutathione S-transferase P; Conjugation of reduced glutathione to a wide number of exogenous and endogenous hydrophobic electrophiles. Regulates negatively CDK5 activity via p25/p35 translocation to prevent neurodegeneration; Soluble glutathione S-transferases
kmeans	1	Red	281	H2AFY	9606.ENSP00000423563	H2A histone family member Y; Core histone macro-H2A.1; Variant histone H2A which replaces conventional H2A in a subset of nucleosomes where it represses transcription. Nucleosomes wrap and compact DNA into chromatin, limiting DNA accessibility to the cellular machineries which require DNA as a template. Histones thereby play a central role in transcription regulation, DNA repair, DNA replication …
kmeans	1	Red	281	H3F3B	9606.ENSP00000254810	H3 histone, family 3B (H3.3B); Variant histone H3 which replaces conventional H3 in a wide range of nucleosomes in active genes. Constitutes the predominant form of histone H3 in non-dividing cells and is incorporated into chromatin independently of DNA synthesis. Deposited at sites of nucleosomal displacement throughout transcribed genes, suggesting that it represents an epigenetic imprint of tr…
kmeans	1	Red	281	HARS	9606.ENSP00000425634	Histidine--tRNA ligase, cytoplasmic; Cytoplasmic histidine--tRNA ligase (Probable). Plays a role in axon guidance; Aminoacyl tRNA synthetases, Class II
kmeans	1	Red	281	HIST1H1E	9606.ENSP00000307705	Histone cluster 1 h1 family member e; Histone H1.4; Histone H1 protein binds to linker DNA between nucleosomes forming the macromolecular structure known as the chromatin fiber. Histones H1 are necessary for the condensation of nucleosome chains into higher-order structured fibers. Acts also as a regulator of individual gene transcription through chromatin remodeling, nucleosome spacing and DNA m…
kmeans	1	Red	281	HIST1H2AE	9606.ENSP00000303373	Histone cluster 1 H2A family member e; Core component of nucleosome. Nucleosomes wrap and compact DNA into chromatin, limiting DNA accessibility to the cellular machineries which require DNA as a template. Histones thereby play a central role in transcription regulation, DNA repair, DNA replication and chromosomal stability. DNA accessibility is regulated via a complex set of post-translational m…
kmeans	1	Red	281	HIST1H2BJ	9606.ENSP00000476136	Histone cluster 1 h2b family member j; Histone H2B type 1-J; Core component of nucleosome. Nucleosomes wrap and compact DNA into chromatin, limiting DNA accessibility to the cellular machineries which require DNA as a template. Histones thereby play a central role in transcription regulation, DNA repair, DNA replication and chromosomal stability. DNA accessibility is regulated via a complex set o…
kmeans	1	Red	281	HIST1H2BK	9606.ENSP00000349430	Histone cluster 1 h2b family member k; Histone H2B type 1-K; Core component of nucleosome. Nucleosomes wrap and compact DNA into chromatin, limiting DNA accessibility to the cellular machineries which require DNA as a template. Histones thereby play a central role in transcription regulation, DNA repair, DNA replication and chromosomal stability. DNA accessibility is regulated via a complex set o…
kmeans	1	Red	281	HIST1H2BL	9606.ENSP00000366618	Histone cluster 1 h2b family member l; Histone H2B type 1-L; Core component of nucleosome. Nucleosomes wrap and compact DNA into chromatin, limiting DNA accessibility to the cellular machineries which require DNA as a template. Histones thereby play a central role in transcription regulation, DNA repair, DNA replication and chromosomal stability. DNA accessibility is regulated via a complex set o…
kmeans	1	Red	281	HIST1H3J	9606.ENSP00000352252	Histone cluster 1 H3 family member j; Core component of nucleosome. Nucleosomes wrap and compact DNA into chromatin, limiting DNA accessibility to the cellular machineries which require DNA as a template. Histones thereby play a central role in transcription regulation, DNA repair, DNA replication and chromosomal stability. DNA accessibility is regulated via a complex set of post-translational mo…
kmeans	1	Red	281	HIST1H4F	9606.ENSP00000244537	Histone cluster 1 H4 family member f; Core component of nucleosome. Nucleosomes wrap and compact DNA into chromatin, limiting DNA accessibility to the cellular machineries which require DNA as a template. Histones thereby play a central role in transcription regulation, DNA repair, DNA replication and chromosomal stability. DNA accessibility is regulated via a complex set of post-translational mo…
kmeans	1	Red	281	HIST2H2AA	9606.ENSP00000358155	Histone cluster 2 H2A family member a4; Core component of nucleosome. Nucleosomes wrap and compact DNA into chromatin, limiting DNA accessibility to the cellular machineries which require DNA as a template. Histones thereby play a central role in transcription regulation, DNA repair, DNA replication and chromosomal stability. DNA accessibility is regulated via a complex set of post-translational …
kmeans	1	Red	281	HIST2H3PS2	9606.ENSP00000476960	Histone cluster 2 H3 pseudogene 2
kmeans	1	Red	281	HK3	9606.ENSP00000292432	Hexokinase 3; Catalyzes the phosphorylation of hexose, such as D-glucose and D-fructose, to hexose 6-phosphate (D-glucose 6-phosphate and D- fructose 6-phosphate, respectively) . Mediates the initial step of glycolysis by catalyzing phosphorylation of D-glucose to D-glucose 6-phosphate
kmeans	1	Red	281	HMGN2	9606.ENSP00000355228	Non-histone chromosomal protein HMG-17; Binds to the inner side of the nucleosomal DNA thus altering the interaction between the DNA and the histone octamer. May be involved in the process which maintains transcribable genes in a unique chromatin conformation (By similarity); Canonical high mobility group
kmeans	1	Red	281	HNRNPA2B1	9606.ENSP00000346694	Heterogeneous nuclear ribonucleoproteins A2/B1; Heterogeneous nuclear ribonucleoprotein (hnRNP) that associates with nascent pre-mRNAs, packaging them into hnRNP particles. The hnRNP particle arrangement on nascent hnRNA is non- random and sequence-dependent and serves to condense and stabilize the transcripts and minimize tangling and knotting. Packaging plays a role in various processes such as…
kmeans	1	Red	281	HNRNPD	9606.ENSP00000313199	Heterogeneous nuclear ribonucleoprotein a/b/d; Heterogeneous nuclear ribonucleoprotein D0; Binds with high affinity to RNA molecules that contain AU-rich elements (AREs) found within the 3'-UTR of many proto- oncogenes and cytokine mRNAs. Also binds to double- and single- stranded DNA sequences in a specific manner and functions a transcription factor. Each of the RNA-binding domains specifically…
kmeans	1	Red	281	HNRNPF	9606.ENSP00000400433	Heterogeneous nuclear ribonucleoprotein F; Component of the heterogeneous nuclear ribonucleoprotein (hnRNP) complexes which provide the substrate for the processing events that pre-mRNAs undergo before becoming functional, translatable mRNAs in the cytoplasm. Plays a role in the regulation of alternative splicing events. Binds G-rich sequences in pre-mRNAs and keeps target RNA in an unfolded stat…
kmeans	1	Red	281	HNRNPK	9606.ENSP00000365439	Heterogeneous nuclear ribonucleoprotein K; One of the major pre-mRNA-binding proteins. Binds tenaciously to poly(C) sequences. Likely to play a role in the nuclear metabolism of hnRNAs, particularly for pre-mRNAs that contain cytidine-rich sequences. Can also bind poly(C) single- stranded DNA. Plays an important role in p53/TP53 response to DNA damage, acting at the level of both transcription ac…
kmeans	1	Red	281	HNRNPR	9606.ENSP00000363745	Heterogeneous nuclear ribonucleoprotein R; Component of ribonucleosomes, which are complexes of at least 20 other different heterogenious nuclear ribonucleoproteins (hnRNP). hnRNP play an important role in processing of precursor mRNA in the nucleus; RNA binding motif containing
kmeans	1	Red	281	HNRNPU	9606.ENSP00000283179	Heterogeneous nuclear ribonucleoprotein U; DNA- and RNA-binding protein involved in several cellular processes such as nuclear chromatin organization, telomere-length regulation, transcription, mRNA alternative splicing and stability, Xist-mediated transcriptional silencing and mitotic cell progression. Plays a role in the regulation of interphase large-scale gene-rich chromatin organization thro…
kmeans	1	Red	281	HPRT1	9606.ENSP00000298556	Hypoxanthine-guanine phosphoribosyltransferase; Converts guanine to guanosine monophosphate, and hypoxanthine to inosine monophosphate. Transfers the 5- phosphoribosyl group from 5-phosphoribosylpyrophosphate onto the purine. Plays a central role in the generation of purine nucleotides through the purine salvage pathway
kmeans	1	Red	281	HSP90AA1	9606.ENSP00000335153	Heat shock protein HSP 90-alpha; Molecular chaperone that promotes the maturation, structural maintenance and proper regulation of specific target proteins involved for instance in cell cycle control and signal transduction. Undergoes a functional cycle that is linked to its ATPase activity which is essential for its chaperone activity. This cycle probably induces conformational changes in the cl…
kmeans	1	Red	281	HSP90AB1	9606.ENSP00000360609	Heat shock protein 90 alpha family class b member 1; Heat shock protein HSP 90-beta; Molecular chaperone that promotes the maturation, structural maintenance and proper regulation of specific target proteins involved for instance in cell cycle control and signal transduction. Undergoes a functional cycle that is linked to its ATPase activity. This cycle probably induces conformational changes in …
kmeans	1	Red	281	HSP90B1	9606.ENSP00000299767	Endoplasmin; Molecular chaperone that functions in the processing and transport of secreted proteins. When associated with CNPY3, required for proper folding of Toll-like receptors (By similarity). Functions in endoplasmic reticulum associated degradation (ERAD). Has ATPase activity; Belongs to the heat shock protein 90 family
kmeans	1	Red	281	HSPA1B	9606.ENSP00000364801	Heat shock protein family A member 1B
kmeans	1	Red	281	HSPA2	9606.ENSP00000378199	Heat shock-related 70 kDa protein 2; Molecular chaperone implicated in a wide variety of cellular processes, including protection of the proteome from stress, folding and transport of newly synthesized polypeptides, activation of proteolysis of misfolded proteins and the formation and dissociation of protein complexes. Plays a pivotal role in the protein quality control system, ensuring the corre…
kmeans	1	Red	281	HSPA4	9606.ENSP00000302961	Heat shock protein family A member 4; Belongs to the heat shock protein 70 family
kmeans	1	Red	281	HSPA5	9606.ENSP00000324173	78 kDa glucose-regulated protein; Plays a role in facilitating the assembly of multimeric protein complexes inside the endoplasmic reticulum. Involved in the correct folding of proteins and degradation of misfolded proteins via its interaction with DNAJC10, probably to facilitate the release of DNAJC10 from its substrate (By similarity); Belongs to the heat shock protein 70 family
kmeans	1	Red	281	HSPA8	9606.ENSP00000432083	Heat shock cognate 71 kDa protein; Molecular chaperone implicated in a wide variety of cellular processes, including protection of the proteome from stress, folding and transport of newly synthesized polypeptides, activation of proteolysis of misfolded proteins and the formation and dissociation of protein complexes. Plays a pivotal role in the protein quality control system, ensuring the correct…
kmeans	1	Red	281	HYOU1	9606.ENSP00000480150	Hypoxia up-regulated protein 1; Has a pivotal role in cytoprotective cellular mechanisms triggered by oxygen deprivation. May play a role as a molecular chaperone and participate in protein folding; Belongs to the heat shock protein 70 family
kmeans	1	Red	281	ICAM1	9606.ENSP00000264832	Intercellular adhesion molecule 1; ICAM proteins are ligands for the leukocyte adhesion protein LFA-1 (integrin alpha-L/beta-2). During leukocyte trans- endothelial migration, ICAM1 engagement promotes the assembly of endothelial apical cups through ARHGEF26/SGEF and RHOG activation; CD molecules
kmeans	1	Red	281	IDH1	9606.ENSP00000390265	Isocitrate dehydrogenase [nadp] cytoplasmic; Isocitrate dehydrogenase 1, cytosolic
kmeans	1	Red	281	IFIT3	9606.ENSP00000360883	Interferon-induced protein with tetratricopeptide repeats 3; IFN-induced antiviral protein which acts as an inhibitor of cellular as well as viral processes, cell migration, proliferation, signaling, and viral replication. Enhances MAVS- mediated host antiviral responses by serving as an adapter bridging TBK1 to MAVS which leads to the activation of TBK1 and phosphorylation of IRF3 and phosphoryl…
kmeans	1	Red	281	IGFBP5	9606.ENSP00000233813	Insulin-like growth factor-binding protein 5; IGF-binding proteins prolong the half-life of the IGFs and have been shown to either inhibit or stimulate the growth promoting effects of the IGFs on cell culture. They alter the interaction of IGFs with their cell surface receptors
kmeans	1	Red	281	IL1RN	9606.ENSP00000259206	Interleukin-1 receptor antagonist protein; Inhibits the activity of interleukin-1 by binding to receptor IL1R1 and preventing its association with the coreceptor IL1RAP for signaling. Has no interleukin-1 like activity. Binds functional interleukin-1 receptor IL1R1 with greater affinity than decoy receptor IL1R2; however, the physiological relevance of the latter association is unsure; Endogenous…
kmeans	1	Red	281	ILF3	9606.ENSP00000404121	Interleukin enhancer-binding factor 3; RNA-binding protein that plays an essential role in the biogenesis of circular RNAs (circRNAs) which are produced by back- splicing circularization of pre-mRNAs. Within the nucleus, promotes circRNAs processing by stabilizing the regulatory elements residing in the flanking introns of the circularized exons. Plays thereby a role in the back-splicing of a sub…
kmeans	1	Red	281	IMPA2	9606.ENSP00000269159	Myo-inositol-1(or 4)-monophosphatase; Inositol monophosphatase 2; Can use myo-inositol monophosphates, scylloinositol 1,4- diphosphate, glucose-1-phosphate, beta-glycerophosphate, and 2'- AMP as substrates. Has been implicated as the pharmacological target for lithium Li(+) action in brain
kmeans	1	Red	281	IMPDH2	9606.ENSP00000321584	Inosine-5'-monophosphate dehydrogenase 2; Catalyzes the conversion of inosine 5'-phosphate (IMP) to xanthosine 5'-phosphate (XMP), the first committed and rate- limiting step in the de novo synthesis of guanine nucleotides, and therefore plays an important role in the regulation of cell growth. Could also have a single-stranded nucleic acid-binding activity and could play a role in RNA and/or DNA…
kmeans	1	Red	281	JUP	9606.ENSP00000377508	Junction plakoglobin; Common junctional plaque protein. The membrane- associated plaques are architectural elements in an important strategic position to influence the arrangement and function of both the cytoskeleton and the cells within the tissue. The presence of plakoglobin in both the desmosomes and in the intermediate junctions suggests that it plays a central role in the structure and func…
kmeans	1	Red	281	KCTD12	9606.ENSP00000366694	Potassium channel tetramerization domain containing 12; BTB/POZ domain-containing protein KCTD12; Auxiliary subunit of GABA-B receptors that determine the pharmacology and kinetics of the receptor response. Increases agonist potency and markedly alter the G-protein signaling of the receptors by accelerating onset and promoting desensitization (By similarity)
kmeans	1	Red	281	KIF20B	9606.ENSP00000360793	Kinesin-like protein KIF20B; Plus-end-directed motor enzyme that is required for completion of cytokinesis. Required for proper midbody organization and abscission in polarized cortical stem cells. Plays a role in the regulation of neuronal polarization by mediating the transport of specific cargos. Participates in the mobilization of SHTN1 and in the accumulation of PIP3 in the growth cone of pr…
kmeans	1	Red	281	KPNB1	9606.ENSP00000290158	Karyopherin subunit beta 1; Importin subunit beta-1; Functions in nuclear protein import, either in association with an adapter protein, like an importin-alpha subunit, which binds to nuclear localization signals (NLS) in cargo substrates, or by acting as autonomous nuclear transport receptor. Acting autonomously, serves itself as NLS receptor. Docking of the importin/substrate complex to the nuc…
kmeans	1	Red	281	KRT10	9606.ENSP00000269576	Keratin, type I cytoskeletal 10; Keratins, type I
kmeans	1	Red	281	KRT14	9606.ENSP00000167586	Keratin, type I cytoskeletal 14; The nonhelical tail domain is involved in promoting KRT5-KRT14 filaments to self-organize into large bundles and enhances the mechanical properties involved in resilience of keratin intermediate filaments in vitro
kmeans	1	Red	281	KRT17	9606.ENSP00000308452	Keratin, type I cytoskeletal 17; Type I keratin involved in the formation and maintenance of various skin appendages, specifically in determining shape and orientation of hair (By similarity). Required for the correct growth of hair follicles, in particular for the persistence of the anagen (growth) state (By similarity). Modulates the function of TNF-alpha in the specific context of hair cycling…
kmeans	1	Red	281	LAP3	9606.ENSP00000226299	Cytosol aminopeptidase; Presumably involved in the processing and regular turnover of intracellular proteins. Catalyzes the removal of unsubstituted N-terminal amino acids from various peptides; Belongs to the peptidase M17 family
kmeans	1	Red	281	LDHA	9606.ENSP00000445175	L-lactate dehydrogenase a chain; Lactate dehydrogenase A; Belongs to the LDH/MDH superfamily. LDH family
kmeans	1	Red	281	LDHB	9606.ENSP00000379386	L-lactate dehydrogenase b chain; Lactate dehydrogenase B; Belongs to the LDH/MDH superfamily. LDH family
kmeans	1	Red	281	LGALS1	9606.ENSP00000215909	Galectin-1; Lectin that binds beta-galactoside and a wide array of complex carbohydrates. Plays a role in regulating apoptosis, cell proliferation and cell differentiation. Inhibits CD45 protein phosphatase activity and therefore the dephosphorylation of Lyn kinase. Strong inducer of T-cell apoptosis; Endogenous ligands
kmeans	1	Red	281	LMNA	9606.ENSP00000357283	Prelamin-A/C; Lamins are components of the nuclear lamina, a fibrous layer on the nucleoplasmic side of the inner nuclear membrane, which is thought to provide a framework for the nuclear envelope and may also interact with chromatin. Lamin A and C are present in equal amounts in the lamina of mammals. Plays an important role in nuclear assembly, chromatin organization, nuclear membrane and telom…
kmeans	1	Red	281	LMNB1	9606.ENSP00000261366	Lamin-B1; Lamins are components of the nuclear lamina, a fibrous layer on the nucleoplasmic side of the inner nuclear membrane, which is thought to provide a framework for the nuclear envelope and may also interact with chromatin
kmeans	1	Red	281	LSP1	9606.ENSP00000371194	Lymphocyte-specific protein 1; May play a role in mediating neutrophil activation and chemotaxis
kmeans	1	Red	281	LTA4H	9606.ENSP00000228740	Leukotriene A-4 hydrolase; Epoxide hydrolase that catalyzes the final step in the biosynthesis of the proinflammatory mediator leukotriene B4. Has also aminopeptidase activity; M1 metallopeptidases
kmeans	1	Red	281	LYPD3	9606.ENSP00000244333	Ly6/PLAUR domain-containing protein 3; Supports cell migration. May be involved in urothelial cell-matrix interactions. May be involved in tumor progression; LY6/PLAUR domain containing
kmeans	1	Red	281	MDH1	9606.ENSP00000438144	Malate dehydrogenase, cytoplasmic; Malate dehydrogenase 1; Belongs to the LDH/MDH superfamily. MDH type 2 family
kmeans	1	Red	281	MDH2	9606.ENSP00000327070	Malate dehydrogenase, mitochondrial; Malate dehydrogenase 2
kmeans	1	Red	281	ME1	9606.ENSP00000358719	Malate dehydrogenase (oxaloacetate-decarboxylating)(nadp+); Malic enzyme 1
kmeans	1	Red	281	MMP2	9606.ENSP00000219070	Matrix metalloproteinase-2 (gelatinase a); 72 kDa type IV collagenase; Ubiquitinous metalloproteinase that is involved in diverse functions such as remodeling of the vasculature, angiogenesis, tissue repair, tumor invasion, inflammation, and atherosclerotic plaque rupture. As well as degrading extracellular matrix proteins, can also act on several nonmatrix proteins such as big endothelial 1 and …
kmeans	1	Red	281	MYOC	9606.ENSP00000037502	Myocilin; Secreted glycoprotein regulating the activation of different signaling pathways in adjacent cells to control different processes including cell adhesion, cell-matrix adhesion, cytoskeleton organization and cell migration. Promotes substrate adhesion, spreading and formation of focal contacts. Negatively regulates cell-matrix adhesion and stress fiber assembly through Rho protein signal …
kmeans	1	Red	281	NAGK	9606.ENSP00000477639	N-acetyl-D-glucosamine kinase; Converts endogenous N-acetylglucosamine (GlcNAc), a major component of complex carbohydrates, from lysosomal degradation or nutritional sources into GlcNAc 6-phosphate. Involved in the N-glycolylneuraminic acid (Neu5Gc) degradation pathway: although human is not able to catalyze formation of Neu5Gc due to the inactive CMAHP enzyme, Neu5Gc is present in food and must…
kmeans	1	Red	281	NAMPT	9606.ENSP00000222553	Nicotinamide phosphoribosyltransferase; Catalyzes the condensation of nicotinamide with 5- phosphoribosyl-1-pyrophosphate to yield nicotinamide mononucleotide, an intermediate in the biosynthesis of NAD. It is the rate limiting component in the mammalian NAD biosynthesis pathway. The secreted form behaves both as a cytokine with immunomodulating properties and an adipokine with anti-diabetic prop…
kmeans	1	Red	281	NANS	9606.ENSP00000210444	N-acetylneuraminate synthase; Sialic acid synthase; Produces N-acetylneuraminic acid (Neu5Ac) and 2-keto-3- deoxy-D-glycero-D-galacto-nononic acid (KDN). Can also use N- acetylmannosamine 6-phosphate and mannose 6-phosphate as substrates to generate phosphorylated forms of Neu5Ac and KDN, respectively
kmeans	1	Red	281	NAPRT	9606.ENSP00000401508	Nicotinate phosphoribosyltransferase; Catalyzes the conversion of nicotinic acid (NA) to NA mononucleotide (NaMN). Essential for NA to increase cellular NAD levels and prevent oxidative stress of the cells; Belongs to the NAPRTase family
kmeans	1	Red	281	NCCRP1	9606.ENSP00000342137	Non-specific cytotoxic cell receptor protein 1 homolog; F-box only protein 50; Promotes cell proliferation
kmeans	1	Red	281	NCL	9606.ENSP00000318195	Nucleolin; Nucleolin is the major nucleolar protein of growing eukaryotic cells. It is found associated with intranucleolar chromatin and pre-ribosomal particles. It induces chromatin decondensation by binding to histone H1. It is thought to play a role in pre-rRNA transcription and ribosome assembly. May play a role in the process of transcriptional elongation. Binds RNA oligonucleotides with 5'…
kmeans	1	Red	281	NIT2	9606.ENSP00000377696	Nitrilase family member 2; Omega-amidase NIT2; Has a omega-amidase activity. The role of omega-amidase is to remove potentially toxic intermediates by converting alpha- ketoglutaramate and alpha-ketosuccinamate to biologically useful alpha-ketoglutarate and oxaloacetate, respectively. Overexpression decreases the colony-forming capacity of cultured cells by arresting cells in the G2 phase of the …
kmeans	1	Red	281	NME1-NME2	9606.ENSP00000376886	NME/NM23 nucleoside diphosphate kinase 2; Major role in the synthesis of nucleoside triphosphates other than ATP. The ATP gamma phosphate is transferred to the NDP beta phosphate via a ping-pong mechanism, using a phosphorylated active-site intermediate (By similarity). Negatively regulates Rho activity by interacting with AKAP13/LBC . Acts as a transcriptional activator of the MYC gene; binds DN…
kmeans	1	Red	281	NPM1	9606.ENSP00000296930	Nucleophosmin; Involved in diverse cellular processes such as ribosome biogenesis, centrosome duplication, protein chaperoning, histone assembly, cell proliferation, and regulation of tumor suppressors p53/TP53 and ARF. Binds ribosome presumably to drive ribosome nuclear export. Associated with nucleolar ribonucleoprotein structures and bind single-stranded nucleic acids. Acts as a chaperonin for…
kmeans	1	Red	281	NT5C2	9606.ENSP00000339479	Cytosolic purine 5'-nucleotidase; May have a critical role in the maintenance of a constant composition of intracellular purine/pyrimidine nucleotides in cooperation with other nucleotidases. Preferentially hydrolyzes inosine 5'-monophosphate (IMP) and other purine nucleotides; 5'-nucleotidases
kmeans	1	Red	281	OBBP2	9606.ENSP00000455510	Sialic acid binding Ig-like lectin 5; Putative adhesion molecule that mediates sialic-acid dependent binding to cells. Binds equally to alpha-2,3-linked and alpha-2,6-linked sialic acid. The sialic acid recognition site may be masked by cis interactions with sialic acids on the same cell surface; CD molecules
kmeans	1	Red	281	P4HB	9606.ENSP00000327801	Protein disulfide-isomerase; This multifunctional protein catalyzes the formation, breakage and rearrangement of disulfide bonds. At the cell surface, seems to act as a reductase that cleaves disulfide bonds of proteins attached to the cell. May therefore cause structural modifications of exofacial proteins. Inside the cell, seems to form/rearrange disulfide bonds of nascent proteins. At high con…
kmeans	1	Red	281	PABPC1	9606.ENSP00000313007	Polyadenylate-binding protein 1; Binds the poly(A) tail of mRNA, including that of its own transcript. May be involved in cytoplasmic regulatory processes of mRNA metabolism such as pre-mRNA splicing. Its function in translational initiation regulation can either be enhanced by PAIP1 or repressed by PAIP2. Can probably bind to cytoplasmic RNA sequences other than poly(A) in vivo. Involved in tran…
kmeans	1	Red	281	PARK7	9606.ENSP00000418770	Protein/nucleic acid deglycase DJ-1; Protein and nucleotide deglycase that catalyzes the deglycation of the Maillard adducts formed between amino groups of proteins or nucleotides and reactive carbonyl groups of glyoxals. Thus, functions as a protein deglycase that repairs methylglyoxal- and glyoxal-glycated proteins, and releases repaired proteins and lactate or glycolate, respectively. Deglycat…
kmeans	1	Red	281	PCBP1	9606.ENSP00000305556	Poly(rC)-binding protein 1; Single-stranded nucleic acid binding protein that binds preferentially to oligo dC. In case of infection by poliovirus, plays a role in initiation of viral RNA replication in concert with the viral protein 3CD
kmeans	1	Red	281	PCMT1	9606.ENSP00000356354	Protein-L-isoaspartate(D-aspartate) O-methyltransferase; Catalyzes the methyl esterification of L-isoaspartyl and D-aspartyl residues in peptides and proteins that result from spontaneous decomposition of normal L-aspartyl and L-asparaginyl residues. It plays a role in the repair and/or degradation of damaged proteins. Acts on EIF4EBP2, microtubule-associated protein 2, calreticulin, clathrin lig…
kmeans	1	Red	281	PDCD6IP	9606.ENSP00000411825	Programmed cell death 6-interacting protein; Multifunctional protein involved in endocytosis, multivesicular body biogenesis, membrane repair, cytokinesis, apoptosis and maintenance of tight junction integrity. Class E VPS protein involved in concentration and sorting of cargo proteins of the multivesicular body (MVB) for incorporation into intralumenal vesicles (ILVs) that are generated by invag…
kmeans	1	Red	281	PDIA3	9606.ENSP00000300289	Protein disulfide-isomerase A3; Protein disulfide isomerase family A member 3; Belongs to the protein disulfide isomerase family
kmeans	1	Red	281	PDIA4	9606.ENSP00000286091	Protein disulfide-isomerase A4; Protein disulfide isomerase family A member 4; Belongs to the protein disulfide isomerase family
kmeans	1	Red	281	PDIA6	9606.ENSP00000385385	Protein disulfide-isomerase A6; May function as a chaperone that inhibits aggregation of misfolded proteins. Negatively regulates the unfolded protein response (UPR) through binding to UPR sensors such as ERN1, which in turn inactivates ERN1 signaling. May also regulate the UPR via the EIF2AK3 UPR sensor. Plays a role in platelet aggregation and activation by agonists such as convulxin, collagen …
kmeans	1	Red	281	PEBP1	9606.ENSP00000261313	Phosphatidylethanolamine-binding protein 1; Binds ATP, opioids and phosphatidylethanolamine. Has lower affinity for phosphatidylinositol and phosphatidylcholine. Serine protease inhibitor which inhibits thrombin, neuropsin and chymotrypsin but not trypsin, tissue type plasminogen activator and elastase (By similarity). Inhibits the kinase activity of RAF1 by inhibiting its activation and by disso…
kmeans	1	Red	281	PEBP4	9606.ENSP00000256404	Phosphatidylethanolamine-binding protein 4; Seems to promote cellular resistance to TNF-induced apoptosis by inhibiting activation of the Raf-1/MEK/ERK pathway, JNK and phosphatidylethanolamine externalization; Belongs to the phosphatidylethanolamine-binding protein family
kmeans	1	Red	281	PEPD	9606.ENSP00000244137	Xaa-Pro dipeptidase; Splits dipeptides with a prolyl or hydroxyprolyl residue in the C-terminal position. Plays an important role in collagen metabolism because the high level of iminoacids in collagen; Belongs to the peptidase M24B family. Eukaryotic-type prolidase subfamily
kmeans	1	Red	281	PGAM1	9606.ENSP00000359991	2,3-bisphosphoglycerate-dependent phosphoglycerate mutase; Phosphoglycerate mutase 1; Interconversion of 3- and 2-phosphoglycerate with 2,3- bisphosphoglycerate as the primer of the reaction. Can also catalyze the reaction of EC 5.4.2.4 (synthase), but with a reduced activity
kmeans	1	Red	281	PGAM2	9606.ENSP00000297283	Phosphoglycerate mutase 2; Interconversion of 3- and 2-phosphoglycerate with 2,3- bisphosphoglycerate as the primer of the reaction. Can also catalyze the reaction of EC 5.4.2.4 (synthase), but with a reduced activity; Belongs to the phosphoglycerate mutase family. BPG- dependent PGAM subfamily
kmeans	1	Red	281	PGD	9606.ENSP00000270776	6-phosphogluconate dehydrogenase, decarboxylating; Catalyzes the oxidative decarboxylation of 6- phosphogluconate to ribulose 5-phosphate and CO(2), with concomitant reduction of NADP to NADPH; Belongs to the 6-phosphogluconate dehydrogenase family
kmeans	1	Red	281	1	9606.ENSP00000362413	Phosphoglycerate kinase 1; In addition to its role as a glycolytic enzyme, it seems that PGK-1 acts as a polymerase alpha cofactor protein (primer recognition protein). May play a role in sperm motility
kmeans	1	Red	281	PGLS	9606.ENSP00000252603	6-phosphogluconolactonase; Hydrolysis of 6-phosphogluconolactone to 6- phosphogluconate
kmeans	1	Red	281	PGM1	9606.ENSP00000360124	Phosphoglucomutase-1; This enzyme participates in both the breakdown and synthesis of glucose; Belongs to the phosphohexose mutase family
kmeans	1	Red	281	PHPT1	9606.ENSP00000247665	14 kDa phosphohistidine phosphatase; Exhibits phosphohistidine phosphatase activity; Protein phosphatases
kmeans	1	Red	281	PKM	9606.ENSP00000320171	Pyruvate kinase m1/2; Pyruvate kinase PKM; Glycolytic enzyme that catalyzes the transfer of a phosphoryl group from phosphoenolpyruvate (PEP) to ADP, generating ATP. Stimulates POU5F1-mediated transcriptional activation. Plays a general role in caspase independent cell death of tumor cells. The ratio between the highly active tetrameric form and nearly inactive dimeric form determines whether glu…
kmeans	1	Red	281	PLBD1	9606.ENSP00000240617	Phospholipase b domain containing 1; Phospholipase B-like 1; In view of the small size of the putative binding pocket, it has been proposed that it may act as an amidase or a peptidase (By similarity). Exhibits a weak phospholipase activity, acting on various phospholipids, including phosphatidylcholine, phosphatidylinositol, phosphatidylethanolamine and lysophospholipids
kmeans	1	Red	281	PLG	9606.ENSP00000308938	Plasminogen; Plasmin dissolves the fibrin of blood clots and acts as a proteolytic factor in a variety of other processes including embryonic development, tissue remodeling, tumor invasion, and inflammation. In ovulation, weakens the walls of the Graafian follicle. It activates the urokinase-type plasminogen activator, collagenases and several complement zymogens, such as C1 and C5. Cleavage of f…
kmeans	1	Red	281	PLIN1	9606.ENSP00000300055	Perilipin-1; Modulator of adipocyte lipid metabolism. Coats lipid storage droplets to protect them from breakdown by hormone- sensitive lipase (HSL). Its absence may result in leanness. Plays a role in unilocular lipid droplet formation by activating CIDEC. Their interaction promotes lipid droplet enlargement and directional net neutral lipid transfer. May modulate lipolysis and triglyceride leve…
kmeans	1	Red	281	PNP	9606.ENSP00000354532	Purine-nucleoside phosphorylase; Purine nucleoside phosphorylase; The purine nucleoside phosphorylases catalyze the phosphorolytic breakdown of the N-glycosidic bond in the beta- (deoxy)ribonucleoside molecules, with the formation of the corresponding free purine bases and pentose-1-phosphate
kmeans	1	Red	281	POSTN	9606.ENSP00000369071	Periostin; Induces cell attachment and spreading and plays a role in cell adhesion. Enhances incorporation of BMP1 in the fibronectin matrix of connective tissues, and subsequent proteolytic activation of lysyl oxidase LOX (By similarity); Gla domain containing
kmeans	1	Red	281	POTEF	9606.ENSP00000350052	POTE ankyrin domain family member F; In the C-terminal section; belongs to the actin family
kmeans	1	Red	281	POTEJ	9606.ENSP00000387176	POTE ankyrin domain family member J; In the N-terminal section; belongs to the POTE family
kmeans	1	Red	281	PPIA	9606.ENSP00000419425	Peptidyl-prolyl cis-trans isomerase A; PPIases accelerate the folding of proteins. It catalyzes the cis-trans isomerization of proline imidic peptide bonds in oligopeptides; Belongs to the cyclophilin-type PPIase family. PPIase A subfamily
kmeans	1	Red	281	PPIB	9606.ENSP00000300026	Peptidyl-prolyl cis-trans isomerase B; PPIases accelerate the folding of proteins. It catalyzes the cis-trans isomerization of proline imidic peptide bonds in oligopeptides; Cyclophilin peptidylprolyl isomerases
kmeans	1	Red	281	PPP5C	9606.ENSP00000012443	Serine/threonine-protein phosphatase 5; Serine/threonine-protein phosphatase that dephosphorylates a myriad of proteins involved in different signaling pathways including the kinases CSNK1E, ASK1/MAP3K5, PRKDC and RAF1, the nuclear receptors NR3C1, PPARG, ESR1 and ESR2, SMAD proteins and TAU/MAPT. Implicated in wide ranging cellular processes, including apoptosis, differentiation, DNA damage resp…
kmeans	1	Red	281	PRDX1	9606.ENSP00000262746	Peroxiredoxin-1; Thiol-specific peroxidase that catalyzes the reduction of hydrogen peroxide and organic hydroperoxides to water and alcohols, respectively. Plays a role in cell protection against oxidative stress by detoxifying peroxides and as sensor of hydrogen peroxide-mediated signaling events. Might participate in the signaling cascades of growth factors and tumor necrosis factor-alpha by r…
kmeans	1	Red	281	PRDX2	9606.ENSP00000301522	Peroxiredoxin-2; Thiol-specific peroxidase that catalyzes the reduction of hydrogen peroxide and organic hydroperoxides to water and alcohols, respectively. Plays a role in cell protection against oxidative stress by detoxifying peroxides and as sensor of hydrogen peroxide-mediated signaling events. Might participate in the signaling cascades of growth factors and tumor necrosis factor-alpha by r…
kmeans	1	Red	281	PRDX3	9606.ENSP00000298510	Thioredoxin-dependent peroxide reductase, mitochondrial; Thiol-specific peroxidase that catalyzes the reduction of hydrogen peroxide and organic hydroperoxides to water and alcohols, respectively. Plays a role in cell protection against oxidative stress by detoxifying peroxides. Acts synergistically with MAP3K13 to regulate the activation of NF-kappa-B in the cytosol; Peroxiredoxins
kmeans	1	Red	281	PRDX5	9606.ENSP00000265462	Peroxiredoxin-5, mitochondrial; Thiol-specific peroxidase that catalyzes the reduction of hydrogen peroxide and organic hydroperoxides to water and alcohols, respectively. Plays a role in cell protection against oxidative stress by detoxifying peroxides and as sensor of hydrogen peroxide-mediated signaling events; Belongs to the peroxiredoxin family. Prx5 subfamily
kmeans	1	Red	281	PRDX6	9606.ENSP00000342026	Peroxiredoxin-6; Thiol-specific peroxidase that catalyzes the reduction of hydrogen peroxide and organic hydroperoxides to water and alcohols, respectively. Can reduce H(2)O(2) and short chain organic, fatty acid, and phospholipid hydroperoxides. Also has phospholipase activity, and can therefore either reduce the oxidized sn-2 fatty acyl grup of phospholipids (peroxidase activity) or hydrolyze t…
kmeans	1	Red	281	PREP	9606.ENSP00000358106	Prolyl endopeptidase; Cleaves peptide bonds on the C-terminal side of prolyl residues within peptides that are up to approximately 30 amino acids long; Belongs to the peptidase S9A family
kmeans	1	Red	281	PRKG1	9606.ENSP00000363092	cGMP-dependent protein kinase 1; Serine/threonine protein kinase that acts as key mediator of the nitric oxide (NO)/cGMP signaling pathway. GMP binding activates PRKG1, which phosphorylates serines and threonines on many cellular proteins. Numerous protein targets for PRKG1 phosphorylation are implicated in modulating cellular calcium, but the contribution of each of these targets may vary substa…
kmeans	1	Red	281	PSMA1	9606.ENSP00000414359	Proteasome subunit alpha type-1; Component of the 20S core proteasome complex involved in the proteolytic degradation of most intracellular proteins. This complex plays numerous essential roles within the cell by associating with different regulatory particles. Associated with two 19S regulatory particles, forms the 26S proteasome and thus participates in the ATP-dependent degradation of ubiquiti…
kmeans	1	Red	281	PSMA2	9606.ENSP00000223321	Proteasome subunit alpha type-2; Component of the 20S core proteasome complex involved in the proteolytic degradation of most intracellular proteins. This complex plays numerous essential roles within the cell by associating with different regulatory particles. Associated with two 19S regulatory particles, forms the 26S proteasome and thus participates in the ATP-dependent degradation of ubiquiti…
kmeans	1	Red	281	PSMA3	9606.ENSP00000216455	Proteasome subunit alpha type-3; Component of the 20S core proteasome complex involved in the proteolytic degradation of most intracellular proteins. This complex plays numerous essential roles within the cell by associating with different regulatory particles. Associated with two 19S regulatory particles, forms the 26S proteasome and thus participates in the ATP-dependent degradation of ubiquiti…
kmeans	1	Red	281	PSMA4	9606.ENSP00000044462	Proteasome subunit alpha type-4; Component of the 20S core proteasome complex involved in the proteolytic degradation of most intracellular proteins. This complex plays numerous essential roles within the cell by associating with different regulatory particles. Associated with two 19S regulatory particles, forms the 26S proteasome and thus participates in the ATP-dependent degradation of ubiquiti…
kmeans	1	Red	281	PSMA5	9606.ENSP00000271308	Proteasome subunit alpha type-5; Component of the 20S core proteasome complex involved in the proteolytic degradation of most intracellular proteins. This complex plays numerous essential roles within the cell by associating with different regulatory particles. Associated with two 19S regulatory particles, forms the 26S proteasome and thus participates in the ATP-dependent degradation of ubiquiti…
kmeans	1	Red	281	PSMA7	9606.ENSP00000359910	Proteasome subunit alpha type-7; Component of the 20S core proteasome complex involved in the proteolytic degradation of most intracellular proteins. This complex plays numerous essential roles within the cell by associating with different regulatory particles. Associated with two 19S regulatory particles, forms the 26S proteasome and thus participates in the ATP-dependent degradation of ubiquiti…
kmeans	1	Red	281	PSMB1	9606.ENSP00000262193	Proteasome subunit beta type-1; Component of the 20S core proteasome complex involved in the proteolytic degradation of most intracellular proteins. This complex plays numerous essential roles within the cell by associating with different regulatory particles. Associated with two 19S regulatory particles, forms the 26S proteasome and thus participates in the ATP-dependent degradation of ubiquitin…
kmeans	1	Red	281	PSMB10	9606.ENSP00000351314	Proteasome subunit beta type-10; The proteasome is a multicatalytic proteinase complex which is characterized by its ability to cleave peptides with Arg, Phe, Tyr, Leu, and Glu adjacent to the leaving group at neutral or slightly basic pH. The proteasome has an ATP-dependent proteolytic activity. This subunit is involved in antigen processing to generate class I binding peptides; Belongs to the p…
kmeans	1	Red	281	PSMB4	9606.ENSP00000290541	Proteasome subunit beta type-4; Component of the 20S core proteasome complex involved in the proteolytic degradation of most intracellular proteins. This complex plays numerous essential roles within the cell by associating with different regulatory particles. Associated with two 19S regulatory particles, forms the 26S proteasome and thus participates in the ATP-dependent degradation of ubiquitin…
kmeans	1	Red	281	PSMB6	9606.ENSP00000270586	Proteasome subunit beta type-6; Component of the 20S core proteasome complex involved in the proteolytic degradation of most intracellular proteins. This complex plays numerous essential roles within the cell by associating with different regulatory particles. Associated with two 19S regulatory particles, forms the 26S proteasome and thus participates in the ATP-dependent degradation of ubiquitin…
kmeans	1	Red	281	PSMB7	9606.ENSP00000259457	Proteasome subunit beta type-7; Component of the 20S core proteasome complex involved in the proteolytic degradation of most intracellular proteins. This complex plays numerous essential roles within the cell by associating with different regulatory particles. Associated with two 19S regulatory particles, forms the 26S proteasome and thus participates in the ATP-dependent degradation of ubiquitin…
kmeans	1	Red	281	PSMB9	9606.ENSP00000363993	Proteasome subunit beta type-9; The proteasome is a multicatalytic proteinase complex which is characterized by its ability to cleave peptides with Arg, Phe, Tyr, Leu, and Glu adjacent to the leaving group at neutral or slightly basic pH. The proteasome has an ATP-dependent proteolytic activity. This subunit is involved in antigen processing to generate class I binding peptides. Replacement of PS…
kmeans	1	Red	281	PSMD3	9606.ENSP00000264639	26S proteasome non-ATPase regulatory subunit 3; Component of the 26S proteasome, a multiprotein complex involved in the ATP-dependent degradation of ubiquitinated proteins. This complex plays a key role in the maintenance of protein homeostasis by removing misfolded or damaged proteins, which could impair cellular functions, and by removing proteins whose functions are no longer required. Therefo…
kmeans	1	Red	281	PSME2	9606.ENSP00000216802	Proteasome activator subunit 2 (pa28 beta); Proteasome activator complex subunit 2; Implicated in immunoproteasome assembly and required for efficient antigen processing. The PA28 activator complex enhances the generation of class I binding peptides by altering the cleavage pattern of the proteasome
kmeans	1	Red	281	PTBP1	9606.ENSP00000349428	Polypyrimidine tract-binding protein 1; Plays a role in pre-mRNA splicing and in the regulation of alternative splicing events. Activates exon skipping of its own pre-mRNA during muscle cell differentiation. Binds to the polypyrimidine tract of introns. May promote RNA looping when bound to two separate polypyrimidine tracts in the same pre-mRNA. May promote the binding of U2 snRNP to pre-mRNA. C…
kmeans	1	Red	281	PYCARD	9606.ENSP00000247470	Apoptosis-associated speck-like protein containing a CARD; Functions as key mediator in apoptosis and inflammation. Promotes caspase-mediated apoptosis involving predominantly caspase-8 and also caspase-9 in a probable cell type-specific manner. Involved in activation of the mitochondrial apoptotic pathway, promotes caspase-8-dependent proteolytic maturation of BID independently of FADD in certai…
kmeans	1	Red	281	PYGL	9606.ENSP00000216392	Glycogen phosphorylase, liver form; Phosphorylase is an important allosteric enzyme in carbohydrate metabolism. Enzymes from different sources differ in their regulatory mechanisms and in their natural substrates. However, all known phosphorylases share catalytic and structural properties
kmeans	1	Red	281	PYGM	9606.ENSP00000164139	Glycogen phosphorylase, muscle associated; Glycogen phosphorylase, muscle form; Phosphorylase is an important allosteric enzyme in carbohydrate metabolism. Enzymes from different sources differ in their regulatory mechanisms and in their natural substrates. However, all known phosphorylases share catalytic and structural properties
kmeans	1	Red	281	RAB7A	9606.ENSP00000265062	Ras-related protein Rab-7a; Key regulator in endo-lysosomal trafficking. Governs early-to-late endosomal maturation, microtubule minus-end as well as plus-end directed endosomal migration and positioning, and endosome-lysosome transport through different protein-protein interaction cascades. Plays a central role, not only in endosomal traffic, but also in many other cellular and physiological eve…
kmeans	1	Red	281	RAC2	9606.ENSP00000249071	Ras-related C3 botulinum toxin substrate 2; Plasma membrane-associated small GTPase which cycles between an active GTP-bound and inactive GDP-bound state. In active state binds to a variety of effector proteins to regulate cellular responses, such as secretory processes, phagocytose of apoptotic cells and epithelial cell polarization. Augments the production of reactive oxygen species (ROS) by NA…
kmeans	1	Red	281	RAD23B	9606.ENSP00000350708	UV excision repair protein RAD23 homolog B; Multiubiquitin chain receptor involved in modulation of proteasomal degradation. Binds to polyubiquitin chains. Proposed to be capable to bind simultaneously to the 26S proteasome and to polyubiquitinated substrates and to deliver ubiquitinated proteins to the proteasome. May play a role in endoplasmic reticulum- associated degradation (ERAD) of misfold…
kmeans	1	Red	281	RALB	9606.ENSP00000272519	Ras-related protein Ral-B; Multifunctional GTPase involved in a variety of cellular processes including gene expression, cell migration, cell proliferation, oncogenic transformation and membrane trafficking. Accomplishes its multiple functions by interacting with distinct downstream effectors. Acts as a GTP sensor for GTP-dependent exocytosis of dense core vesicles (By similarity). Required both …
kmeans	1	Red	281	RALBP1	9606.ENSP00000019317	RalA-binding protein 1; Can activate specifically hydrolysis of GTP bound to RAC1 and CDC42, but not RALA. Mediates ATP-dependent transport of S-(2,4-dinitrophenyl)-glutathione (DNP-SG) and doxorubicin (DOX) and is the major ATP-dependent transporter of glutathione conjugates of electrophiles (GS-E) and DOX in erythrocytes. Can catalyze transport of glutathione conjugates and xenobiotics, and may…
kmeans	1	Red	281	RPIA	9606.ENSP00000283646	Ribose 5-phosphate isomerase A; Belongs to the ribose 5-phosphate isomerase family
kmeans	1	Red	281	RPS16	9606.ENSP00000251453	Small subunit ribosomal protein s16e; Ribosomal protein S16
kmeans	1	Red	281	RPS27A	9606.ENSP00000272317	Ubiquitin-40S ribosomal protein S27a; Ubiquitin: Exists either covalently attached to another protein, or free (unanchored). When covalently bound, it is conjugated to target proteins via an isopeptide bond either as a monomer (monoubiquitin), a polymer linked via different Lys residues of the ubiquitin (polyubiquitin chains) or a linear polymer linked via the initiator Met of the ubiquitin (line…
kmeans	1	Red	281	S100A10	9606.ENSP00000357801	Protein S100-A10; Because S100A10 induces the dimerization of ANXA2/p36, it may function as a regulator of protein phosphorylation in that the ANXA2 monomer is the preferred target (in vitro) of tyrosine- specific kinase; Belongs to the S-100 family
kmeans	1	Red	281	S100A12	9606.ENSP00000357726	Protein S100-A12; S100A12 is a calcium-, zinc- and copper-binding protein which plays a prominent role in the regulation of inflammatory processes and immune response. Its proinflammatory activity involves recruitment of leukocytes, promotion of cytokine and chemokine production, and regulation of leukocyte adhesion and migration. Acts as an alarmin or a danger associated molecular pattern (DAMP)…
kmeans	1	Red	281	S100A4	9606.ENSP00000357705	S100 calcium binding protein A4; EF-hand domain containing
kmeans	1	Red	281	S100A6	9606.ENSP00000357709	Protein S100-A6; May function as calcium sensor and modulator, contributing to cellular calcium signaling. May function by interacting with other proteins, such as TPR-containing proteins, and indirectly play a role in many physiological processes such as the reorganization of the actin cytoskeleton and in cell motility. Binds 2 calcium ions. Calcium binding is cooperative; EF-hand domain contain…
kmeans	1	Red	281	S100A8	9606.ENSP00000357722	Protein S100-A8; S100A8 is a calcium- and zinc-binding protein which plays a prominent role in the regulation of inflammatory processes and immune response. It can induce neutrophil chemotaxis and adhesion. Predominantly found as calprotectin (S100A8/A9) which has a wide plethora of intra- and extracellular functions. The intracellular functions include: facilitating leukocyte arachidonic acid tr…
kmeans	1	Red	281	S100A9	9606.ENSP00000357727	Protein S100-A9; S100A9 is a calcium- and zinc-binding protein which plays a prominent role in the regulation of inflammatory processes and immune response. It can induce neutrophil chemotaxis, adhesion, can increase the bactericidal activity of neutrophils by promoting phagocytosis via activation of SYK, PI3K/AKT, and ERK1/2 and can induce degranulation of neutrophils by a MAPK-dependent mechani…
kmeans	1	Red	281	SEPT2	9606.ENSP00000479861	Septin-2; Filament-forming cytoskeletal GTPase. Forms a filamentous structure with SEPT12, SEPT6, SEPT2 and probably SEPT4 at the sperm annulus which is required for the structural integrity and motility of the sperm tail during postmeiotic differentiation. Required for normal organization of the actin cytoskeleton. Plays a role in the biogenesis of polarized columnar-shaped epithelium by maintai…
kmeans	1	Red	281	SET	9606.ENSP00000361777	Protein SET; Multitasking protein, involved in apoptosis, transcription, nucleosome assembly and histone chaperoning. Isoform 2 anti-apoptotic activity is mediated by inhibition of the GZMA-activated DNase, NME1. In the course of cytotoxic T- lymphocyte (CTL)-induced apoptosis, GZMA cleaves SET, disrupting its binding to NME1 and releasing NME1 inhibition. Isoform 1 and isoform 2 are potent inhib…
kmeans	1	Red	281	SFN	9606.ENSP00000340989	14-3-3 protein sigma; Adapter protein implicated in the regulation of a large spectrum of both general and specialized signaling pathways. Binds to a large number of partners, usually by recognition of a phosphoserine or phosphothreonine motif. Binding generally results in the modulation of the activity of the binding partner. When bound to KRT17, regulates protein synthesis and epithelial cell g…
kmeans	1	Red	281	SIGLEC14	9606.ENSP00000354090	Sialic acid-binding Ig-like lectin 14; Putative adhesion molecule. Sialic acid-binding paired receptor which may activate associated receptors; Belongs to the immunoglobulin superfamily. SIGLEC (sialic acid binding Ig-like lectin) family
kmeans	1	Red	281	SLC2A1	9606.ENSP00000416293	Solute carrier family 2, facilitated glucose transporter member 1; Facilitative glucose transporter. This isoform may be responsible for constitutive or basal glucose uptake. Has a very broad substrate specificity; can transport a wide range of aldoses including both pentoses and hexoses; Belongs to the major facilitator superfamily. Sugar transporter (TC 2.A.1.1) family. Glucose transporter subf…
kmeans	1	Red	281	SLC4A1	9606.ENSP00000262418	Solute carrier family 4 member 1 (diego blood group); Band 3 anion transport protein; Functions both as a transporter that mediates electroneutral anion exchange across the cell membrane and as a structural protein. Major integral membrane glycoprotein of the erythrocyte membrane; required for normal flexibility and stability of the erythrocyte membrane and for normal erythrocyte shape via the in…
kmeans	1	Red	281	SLC9A3R1	9606.ENSP00000262613	Na(+)/H(+) exchange regulatory cofactor NHE-RF1; Scaffold protein that connects plasma membrane proteins with members of the ezrin/moesin/radixin family and thereby helps to link them to the actin cytoskeleton and to regulate their surface expression. Necessary for recycling of internalized ADRB2. Was first known to play a role in the regulation of the activity and subcellular location of SLC9A3.…
kmeans	1	Red	281	SLURP1	9606.ENSP00000246515	Secreted Ly-6/uPAR-related protein 1; Has an antitumor activity. Was found to be a marker of late differentiation of the skin. Implicated in maintaining the physiological and structural integrity of the keratinocyte layers of the skin. In vitro down-regulates keratinocyte proliferation; the function may involve the proposed role as modulator of nicotinic acetylcholine receptors (nAChRs) activity.…
kmeans	1	Red	281	SNCA	9606.ENSP00000338345	Alpha-synuclein; May be involved in the regulation of dopamine release and transport. Induces fibrillization of microtubule-associated protein tau. Reduces neuronal responsiveness to various apoptotic stimuli, leading to a decreased caspase-3 activation; Parkinson disease associated genes
kmeans	1	Red	281	SOD1	9606.ENSP00000270142	Superoxide dismutase, cu-zn family; Superoxide dismutase [Cu-Zn]; Destroys radicals which are normally produced within the cells and which are toxic to biological systems
kmeans	1	Red	281	SOD2	9606.ENSP00000446252	Superoxide dismutase [Mn], mitochondrial; Destroys superoxide anion radicals which are normally produced within the cells and which are toxic to biological systems
kmeans	1	Red	281	SOD3	9606.ENSP00000371554	Extracellular superoxide dismutase [Cu-Zn]; Protect the extracellular space from toxic effect of reactive oxygen intermediates by converting superoxide radicals into hydrogen peroxide and oxygen
kmeans	1	Red	281	SRSF1	9606.ENSP00000258962	Serine/arginine-rich splicing factor 1; Plays a role in preventing exon skipping, ensuring the accuracy of splicing and regulating alternative splicing. Interacts with other spliceosomal components, via the RS domains, to form a bridge between the 5'- and 3'-splice site binding components, U1 snRNP and U2AF. Can stimulate binding of U1 snRNP to a 5'-splice site-containing pre-mRNA. Binds to purin…
kmeans	1	Red	281	ST13	9606.ENSP00000216218	Hsc70-interacting protein; One HIP oligomer binds the ATPase domains of at least two HSC70 molecules dependent on activation of the HSC70 ATPase by HSP40. Stabilizes the ADP state of HSC70 that has a high affinity for substrate protein. Through its own chaperone activity, it may contribute to the interaction of HSC70 with various target proteins (By similarity); Belongs to the FAM10 family
kmeans	1	Red	281	STIP1	9606.ENSP00000351646	Stress-induced-phosphoprotein 1; Acts as a co-chaperone for HSP90AA1. Mediates the association of the molecular chaperones HSPA8/HSC70 and HSP90 (By similarity); Tetratricopeptide repeat domain containing
kmeans	1	Red	281	SUMO3	9606.ENSP00000409666	Small ubiquitin-like modifier 3
kmeans	1	Red	281	TAGLN3	9606.ENSP00000377494	Transgelin-3; Transgelin 3
kmeans	1	Red	281	TALDO1	9606.ENSP00000321259	Transaldolase 1; Transaldolase; Transaldolase is important for the balance of metabolites in the pentose-phosphate pathway
kmeans	1	Red	281	TCEB2	9606.ENSP00000262306	Elongin-B; SIII, also known as elongin, is a general transcription elongation factor that increases the RNA polymerase II transcription elongation past template-encoded arresting sites. Subunit A is transcriptionally active and its transcription activity is strongly enhanced by binding to the dimeric complex of the SIII regulatory subunits B and C (elongin BC complex). In embryonic stem cells, th…
kmeans	1	Red	281	TFEB	9606.ENSP00000351742	Transcription factor EB; Transcription factor that specifically recognizes and binds E-box sequences (5'-CANNTG-3'). Efficient DNA-binding requires dimerization with itself or with another MiT/TFE family member such as TFE3 or MITF. In association with TFE3, activates the expression of CD40L in T-cells, thereby playing a role in T- cell-dependent antibody responses in activated CD4(+) T-cells and…
kmeans	1	Red	281	TGFBI	9606.ENSP00000416330	Transforming growth factor-beta-induced protein ig-h3; Plays a role in cell adhesion. May play a role in cell-collagen interactions (By similarity)
kmeans	1	Red	281	THBS1	9606.ENSP00000260356	Thrombospondin-1; Adhesive glycoprotein that mediates cell-to-cell and cell-to-matrix interactions. Binds heparin. May play a role in dentinogenesis and/or maintenance of dentin and dental pulp (By similarity). Ligand for CD36 mediating antiangiogenic properties. Plays a role in ER stress response, via its interaction with the activating transcription factor 6 alpha (ATF6) which produces adaptive…
kmeans	1	Red	281	TIMP1	9606.ENSP00000218388	Metalloproteinase inhibitor 1; Metalloproteinase inhibitor that functions by forming one to one complexes with target metalloproteinases, such as collagenases, and irreversibly inactivates them by binding to their catalytic zinc cofactor. Acts on MMP1, MMP2, MMP3, MMP7, MMP8, MMP9, MMP10, MMP11, MMP12, MMP13 and MMP16. Does not act on MMP14. Also functions as a growth factor that regulates cell d…
kmeans	1	Red	281	TIMP2	9606.ENSP00000262768	Metalloproteinase inhibitor 2; Complexes with metalloproteinases (such as collagenases) and irreversibly inactivates them by binding to their catalytic zinc cofactor. Known to act on MMP-1, MMP-2, MMP-3, MMP-7, MMP-8, MMP-9, MMP-10, MMP-13, MMP-14, MMP-15, MMP-16 and MMP-19; Belongs to the protease inhibitor I35 (TIMP) family
kmeans	1	Red	281	TKT	9606.ENSP00000391481	Transketolase; Catalyzes the transfer of a two-carbon ketol group from a ketose donor to an aldose acceptor, via a covalent intermediate with the cofactor thiamine pyrophosphate; Belongs to the transketolase family
kmeans	1	Red	281	TNPO1	9606.ENSP00000336712	Transportin-1; Functions in nuclear protein import as nuclear transport receptor. Serves as receptor for nuclear localization signals (NLS) in cargo substrates. Is thought to mediate docking of the importin/substrate complex to the nuclear pore complex (NPC) through binding to nucleoporin and the complex is subsequently translocated through the pore by an energy requiring, Ran-dependent mechanism…
kmeans	1	Red	281	TPI1	9606.ENSP00000229270	Triosephosphate isomerase (tim); Triosephosphate isomerase 1; Belongs to the triosephosphate isomerase family
kmeans	1	Red	281	TPT1	9606.ENSP00000477781	Tumor protein, translationally-controlled 1; Translationally-controlled tumor protein; Involved in calcium binding and microtubule stabilization
kmeans	1	Red	281	TUBA1C	9606.ENSP00000301072	Tubulin alpha-1C chain; Tubulin is the major constituent of microtubules. It binds two moles of GTP, one at an exchangeable site on the beta chain and one at a non-exchangeable site on the alpha chain; Belongs to the tubulin family
kmeans	1	Red	281	TUBA4A	9606.ENSP00000248437	Tubulin alpha-4A chain; Tubulin is the major constituent of microtubules. It binds two moles of GTP, one at an exchangeable site on the beta chain and one at a non-exchangeable site on the alpha chain; Tubulins
kmeans	1	Red	281	TXN	9606.ENSP00000363641	Thioredoxin; Participates in various redox reactions through the reversible oxidation of its active center dithiol to a disulfide and catalyzes dithiol-disulfide exchange reactions. Plays a role in the reversible S-nitrosylation of cysteine residues in target proteins, and thereby contributes to the response to intracellular nitric oxide. Nitrosylates the active site Cys of CASP3 in response to n…
kmeans	1	Red	281	TYMP	9606.ENSP00000379038	Thymidine phosphorylase; May have a role in maintaining the integrity of the blood vessels. Has growth promoting activity on endothelial cells, angiogenic activity in vivo and chemotactic activity on endothelial cells in vitro; Minor histocompatibility antigens
kmeans	1	Red	281	UBA1	9606.ENSP00000338413	Ubiquitin-like modifier-activating enzyme 1; Catalyzes the first step in ubiquitin conjugation to mark cellular proteins for degradation through the ubiquitin- proteasome system. Activates ubiquitin by first adenylating its C-terminal glycine residue with ATP, and thereafter linking this residue to the side chain of a cysteine residue in E1, yielding a ubiquitin-E1 thioester and free AMP. Essenti…
kmeans	1	Red	281	UBE2D3	9606.ENSP00000349722	Ubiquitin conjugating enzyme E2 D3; Belongs to the ubiquitin-conjugating enzyme family
kmeans	1	Red	281	UBE2N	9606.ENSP00000316176	Ubiquitin-conjugating enzyme E2 N; The UBE2V1-UBE2N and UBE2V2-UBE2N heterodimers catalyze the synthesis of non-canonical 'Lys-63'-linked polyubiquitin chains. This type of polyubiquitination does not lead to protein degradation by the proteasome. Mediates transcriptional activation of target genes. Plays a role in the control of progress through the cell cycle and differentiation. Plays a role i…
kmeans	1	Red	281	UBE2V1	9606.ENSP00000340305	Ubiquitin-conjugating enzyme E2 variant 1; Has no ubiquitin ligase activity on its own. The UBE2V1- UBE2N heterodimer catalyzes the synthesis of non-canonical poly- ubiquitin chains that are linked through Lys-63. This type of poly-ubiquitination activates IKK and does not seem to involve protein degradation by the proteasome. Plays a role in the activation of NF-kappa-B mediated by IL1B, TNF, TR…
kmeans	1	Red	281	USP15	9606.ENSP00000280377	Ubiquitin carboxyl-terminal hydrolase 15; Hydrolase that removes conjugated ubiquitin from target proteins and regulates various pathways such as the TGF-beta receptor signaling, NF-kappa-B and RNF41/NRDP1-PRKN pathways. Acts as a key regulator of TGF-beta receptor signaling pathway, but the precise mechanism is still unclear: according to a report, acts by promoting deubiquitination of monoubiqu…
kmeans	1	Red	281	VCAN	9606.ENSP00000265077	Versican core protein; May play a role in intercellular signaling and in connecting cells with the extracellular matrix. May take part in the regulation of cell motility, growth and differentiation. Binds hyaluronic acid; C-type lectin domain containing
kmeans	1	Red	281	VCP	9606.ENSP00000351777	Transitional endoplasmic reticulum ATPase; Necessary for the fragmentation of Golgi stacks during mitosis and for their reassembly after mitosis. Involved in the formation of the transitional endoplasmic reticulum (tER). The transfer of membranes from the endoplasmic reticulum to the Golgi apparatus occurs via 50-70 nm transition vesicles which derive from part-rough, part-smooth transitional ele…
kmeans	1	Red	281	VIM	9606.ENSP00000446007	Vimentin; Vimentins are class-III intermediate filaments found in various non-epithelial cells, especially mesenchymal cells. Vimentin is attached to the nucleus, endoplasmic reticulum, and mitochondria, either laterally or terminally
kmeans	1	Red	281	WARS	9606.ENSP00000347495	Tryptophan--tRNA ligase, cytoplasmic; Isoform 1, isoform 2 and T1-TrpRS have aminoacylation activity while T2-TrpRS lacks it. Isoform 2, T1-TrpRS and T2-TrpRS possess angiostatic activity whereas isoform 1 lacks it. T2-TrpRS inhibits fluid shear stress-activated responses of endothelial cells. Regulates ERK, Akt, and eNOS activation pathways that are associated with angiogenesis, cytoskeletal reo…
kmeans	1	Red	281	XRCC6	9606.ENSP00000352257	X-ray repair cross-complementing protein 6; Single-stranded DNA-dependent ATP-dependent helicase. Has a role in chromosome translocation. The DNA helicase II complex binds preferentially to fork-like ends of double-stranded DNA in a cell cycle-dependent manner. It works in the 3'-5' direction. Binding to DNA may be mediated by XRCC6. Involved in DNA non-homologous end joining (NHEJ) required for …
kmeans	1	Red	281	YWHAB	9606.ENSP00000361930	14-3-3 protein beta/alpha; Adapter protein implicated in the regulation of a large spectrum of both general and specialized signaling pathways. Binds to a large number of partners, usually by recognition of a phosphoserine or phosphothreonine motif. Binding generally results in the modulation of the activity of the binding partner. Negative regulator of osteogenesis. Blocks the nuclear translocat…
kmeans	1	Red	281	YWHAE	9606.ENSP00000264335	14-3-3 protein epsilon; Adapter protein implicated in the regulation of a large spectrum of both general and specialized signaling pathways. Binds to a large number of partners, usually by recognition of a phosphoserine or phosphothreonine motif. Binding generally results in the modulation of the activity of the binding partner (By similarity). Positively regulates phosphorylated protein HSF1 nuc…
kmeans	1	Red	281	YWHAG	9606.ENSP00000306330	14-3-3 protein gamma; Adapter protein implicated in the regulation of a large spectrum of both general and specialized signaling pathways. Binds to a large number of partners, usually by recognition of a phosphoserine or phosphothreonine motif. Binding generally results in the modulation of the activity of the binding partner; Belongs to the 14-3-3 family
kmeans	1	Red	281	YWHAH	9606.ENSP00000248975	14-3-3 protein eta; Adapter protein implicated in the regulation of a large spectrum of both general and specialized signaling pathways. Binds to a large number of partners, usually by recognition of a phosphoserine or phosphothreonine motif. Binding generally results in the modulation of the activity of the binding partner. Negatively regulates the kinase activity of PDPK1; 14-3-3 phospho-serine…
kmeans	1	Red	281	YWHAQ	9606.ENSP00000371267	14-3-3 protein theta; Adapter protein implicated in the regulation of a large spectrum of both general and specialized signaling pathways. Binds to a large number of partners, usually by recognition of a phosphoserine or phosphothreonine motif. Binding generally results in the modulation of the activity of the binding partner. Negatively regulates the kinase activity of PDPK1; Belongs to the 14-3…
kmeans	1	Red	281	YWHAZ	9606.ENSP00000379287	14-3-3 protein zeta/delta; Adapter protein implicated in the regulation of a large spectrum of both general and specialized signaling pathways. Binds to a large number of partners, usually by recognition of a phosphoserine or phosphothreonine motif. Binding generally results in the modulation of the activity of the binding partner; Belongs to the 14-3-3 family
kmeans	1	Red	281	ZBTB18	9606.ENSP00000351539	Zinc finger and BTB domain-containing protein 18; Transcriptional repressor that plays a role in various developmental processes such as myogenesis and brain development. Plays a key role in myogenesis by directly repressing the expression of ID2 and ID3, 2 inhibitors of skeletal myogenesis. Also involved in controlling cell division of progenitor cells and regulating the survival of postmitotic …
kmeans	1	Red	281	ZNF648	9606.ENSP00000344129	Zinc finger protein 648; May be involved in transcriptional regulation; Zinc fingers C2H2-type
kmeans	1	Red	281	ZNF804B	9606.ENSP00000329638	Zinc finger protein 804B
kmeans	2	Yellow	159	ABCB9	9606.ENSP00000440288	ATP-binding cassette sub-family B member 9; ATP-dependent low-affinity peptide transporter which translocates a broad spectrum of peptides from the cytosol to the lysosomal lumen. Displays a broad peptide length specificity from 6-mer up to at least 59-mer peptides with an optimum of 23-mers. Favors positively charged, aromatic or hydrophobic residues in the N- and C-terminal positions whereas ne…
kmeans	2	Yellow	159	ACTA1	9606.ENSP00000355645	Actin, alpha skeletal muscle; Actins are highly conserved proteins that are involved in various types of cell motility and are ubiquitously expressed in all eukaryotic cells
kmeans	2	Yellow	159	ACTBL2	9606.ENSP00000416706	Beta-actin-like protein 2; Actins are highly conserved proteins that are involved in various types of cell motility and are ubiquitously expressed in all eukaryotic cells
kmeans	2	Yellow	159	ACTN1	9606.ENSP00000377941	Alpha-actinin-1; F-actin cross-linking protein which is thought to anchor actin to a variety of intracellular structures. This is a bundling protein; Belongs to the alpha-actinin family
kmeans	2	Yellow	159	ACTN2	9606.ENSP00000443495	Alpha-actinin-2; F-actin cross-linking protein which is thought to anchor actin to a variety of intracellular structures. This is a bundling protein; Actinins
kmeans	2	Yellow	159	ACTN3	9606.ENSP00000422007	Alpha-actinin-3; F-actin cross-linking protein which is thought to anchor actin to a variety of intracellular structures. This is a bundling protein; Actinins
kmeans	2	Yellow	159	ACTN4	9606.ENSP00000252699	Alpha-actinin-4; F-actin cross-linking protein which is thought to anchor actin to a variety of intracellular structures. This is a bundling protein (Probable). Probably involved in vesicular trafficking via its association with the CART complex. The CART complex is necessary for efficient transferrin receptor recycling but not for EGFR degradation. Involved in tight junction assembly in epitheli…
kmeans	2	Yellow	159	ACTR2	9606.ENSP00000367220	Actin-related protein 2; Functions as ATP-binding component of the Arp2/3 complex which is involved in regulation of actin polymerization and together with an activating nucleation-promoting factor (NPF) mediates the formation of branched actin networks. Seems to contact the pointed end of the daughter actin filament
kmeans	2	Yellow	159	ACTR3	9606.ENSP00000263238	Actin-related protein 3; Functions as ATP-binding component of the Arp2/3 complex which is involved in regulation of actin polymerization and together with an activating nucleation-promoting factor (NPF) mediates the formation of branched actin networks. Seems to contact the pointed end of the daughter actin filament. Plays a role in ciliogenesis; Belongs to the actin family. ARP3 subfamily
kmeans	2	Yellow	159	ADH1B	9606.ENSP00000306606	Alcohol dehydrogenase 1b (class i), beta polypeptide; Alcohol dehydrogenase 1B, beta polypeptide; Belongs to the zinc-containing alcohol dehydrogenase family
kmeans	2	Yellow	159	AHNAK	9606.ENSP00000367263	Neuroblast differentiation-associated protein AHNAK; May be required for neuronal cell differentiation; PDZ domain containing
kmeans	2	Yellow	159	ALAD	9606.ENSP00000386284	Delta-aminolevulinic acid dehydratase; Catalyzes an early step in the biosynthesis of tetrapyrroles. Binds two molecules of 5-aminolevulinate per subunit, each at a distinct site, and catalyzes their condensation to form porphobilinogen; Belongs to the ALAD family
kmeans	2	Yellow	159	ALG13	9606.ENSP00000378260	Putative bifunctional UDP-N-acetylglucosamine transferase and deubiquitinase ALG13; Isoform 1: Possible multifunctional enzyme with both glycosyltransferase and deubiquitinase activities; Belongs to the glycosyltransferase 28 family
kmeans	2	Yellow	159	ALMS1	9606.ENSP00000482968	ALMS1, centrosome and basal body associated protein; Alstrom syndrome protein 1; Involved in PCM1-dependent intracellular transport. Required, directly or indirectly, for the localization of NCAPD2 to the proximal ends of centrioles. Required for proper formation and/or maintenance of primary cilia (PC), microtubule-based structures that protrude from the surface of epithelial cells
kmeans	2	Yellow	159	ANXA1	9606.ENSP00000366109	Annexin A1; Plays important roles in the innate immune response as effector of glucocorticoid-mediated responses and regulator of the inflammatory process. Has anti-inflammatory activity. Plays a role in glucocorticoid-mediated down- regulation of the early phase of the inflammatory response (By similarity). Promotes resolution of inflammation and wound healing. Functions at least in part by acti…
kmeans	2	Yellow	159	ANXA4	9606.ENSP00000377833	Annexin A4; Calcium/phospholipid-binding protein which promotes membrane fusion and is involved in exocytosis; Annexins
kmeans	2	Yellow	159	AP1G1	9606.ENSP00000377148	AP-1 complex subunit gamma-1; Subunit of clathrin-associated adaptor protein complex 1 that plays a role in protein sorting in the late-Golgi/trans-Golgi network (TGN) and/or endosomes. The AP complexes mediate both the recruitment of clathrin to membranes and the recognition of sorting signals within the cytosolic tails of transmembrane cargo molecules
kmeans	2	Yellow	159	AP2B1	9606.ENSP00000482835	AP-2 complex subunit beta; Component of the adaptor protein complex 2 (AP-2). Adaptor protein complexes function in protein transport via transport vesicles in different membrane traffic pathways. Adaptor protein complexes are vesicle coat components and appear to be involved in cargo selection and vesicle formation. AP-2 is involved in clathrin-dependent endocytosis in which cargo proteins are i…
kmeans	2	Yellow	159	APBB1IP	9606.ENSP00000365411	Amyloid beta A4 precursor protein-binding family B member 1-interacting protein; Appears to function in the signal transduction from Ras activation to actin cytoskeletal remodeling. Suppresses insulin- induced promoter activities through AP1 and SRE. Mediates Rap1- induced adhesion; Belongs to the MRL family
kmeans	2	Yellow	159	APOBEC2	9606.ENSP00000244669	Apolipoprotein b mrna editing enzyme catalytic subunit 2; C->U-editing enzyme APOBEC-2; Probable C to U editing enzyme whose physiological substrate is not yet known. Does not display detectable apoB mRNA editing. Has a low intrinsic cytidine deaminase activity. May play a role in the epigenetic regulation of gene expression through the process of active DNA demethylation
kmeans	2	Yellow	159	ARPC1B	9606.ENSP00000389631	Actin-related protein 2/3 complex subunit 1B; Functions as component of the Arp2/3 complex which is involved in regulation of actin polymerization and together with an activating nucleation-promoting factor (NPF) mediates the formation of branched actin networks; Belongs to the WD repeat ARPC1 family
kmeans	2	Yellow	159	ARPC2	9606.ENSP00000295685	Actin-related protein 2/3 complex subunit 2; Functions as actin-binding component of the Arp2/3 complex which is involved in regulation of actin polymerization and together with an activating nucleation-promoting factor (NPF) mediates the formation of branched actin networks. Seems to contact the mother actin filament; Belongs to the ARPC2 family
kmeans	2	Yellow	159	ARPC3	9606.ENSP00000228825	Actin-related protein 2/3 complex subunit 3; Functions as component of the Arp2/3 complex which is involved in regulation of actin polymerization and together with an activating nucleation-promoting factor (NPF) mediates the formation of branched actin networks; Belongs to the ARPC3 family
kmeans	2	Yellow	159	ARPC4	9606.ENSP00000388169	Actin-related protein 2/3 complex subunit 4; Functions as actin-binding component of the Arp2/3 complex which is involved in regulation of actin polymerization and together with an activating nucleation-promoting factor (NPF) mediates the formation of branched actin networks. Seems to contact the mother actin filament
kmeans	2	Yellow	159	ARPC5	9606.ENSP00000294742	Actin-related protein 2/3 complex subunit 5; Functions as component of the Arp2/3 complex which is involved in regulation of actin polymerization and together with an activating nucleation-promoting factor (NPF) mediates the formation of branched actin networks
kmeans	2	Yellow	159	ATP6V1E1	9606.ENSP00000253413	V-type proton ATPase subunit E 1; Subunit of the peripheral V1 complex of vacuolar ATPase essential for assembly or catalytic function. V-ATPase is responsible for acidifying a variety of intracellular compartments in eukaryotic cells; V-type ATPases
kmeans	2	Yellow	159	BCAP31	9606.ENSP00000392330	B-cell receptor-associated protein 31; Functions as a chaperone protein. Is one of the most abundant endoplasmic reticulum (ER) proteins. Plays a role in the export of secreted proteins in the ER, the recognition of abnormally folded protein and their targeting to the ER associated-degradation (ERAD). Also serves as a cargo receptor for the export of transmembrane proteins. May be involved in CAS…
kmeans	2	Yellow	159	BIN1	9606.ENSP00000316779	Myc box-dependent-interacting protein 1; May be involved in regulation of synaptic vesicle endocytosis. May act as a tumor suppressor and inhibits malignant cell transformation; N-BAR domain containing
kmeans	2	Yellow	159	BLMH	9606.ENSP00000261714	Bleomycin hydrolase; The normal physiological role of BLM hydrolase is unknown, but it catalyzes the inactivation of the antitumor drug BLM (a glycopeptide) by hydrolyzing the carboxamide bond of its B- aminoalaninamide moiety thus protecting normal and malignant cells from BLM toxicity
kmeans	2	Yellow	159	BLVRB	9606.ENSP00000263368	Flavin reductase (NADPH); Broad specificity oxidoreductase that catalyzes the NADPH-dependent reduction of a variety of flavins, such as riboflavin, FAD or FMN, biliverdins, methemoglobin and PQQ (pyrroloquinoline quinone). Contributes to heme catabolism and metabolizes linear tetrapyrroles. Can also reduce the complexed Fe(3+) iron to Fe(2+) in the presence of FMN and NADPH. In the liver, conver…
kmeans	2	Yellow	159	CACNA2D1	9606.ENSP00000349320	Calcium voltage-gated channel auxiliary subunit alpha2delta 1; Voltage-dependent calcium channel subunit alpha-2/delta-1; The alpha-2/delta subunit of voltage-dependent calcium channels regulates calcium current density and activation/inactivation kinetics of the calcium channel. Plays an important role in excitation-contraction coupling (By similarity)
kmeans	2	Yellow	159	CAP1	9606.ENSP00000361883	Adenylyl cyclase-associated protein 1; Directly regulates filament dynamics and has been implicated in a number of complex developmental and morphological processes, including mRNA localization and the establishment of cell polarity; Belongs to the CAP family
kmeans	2	Yellow	159	CAPN1	9606.ENSP00000431984	Calpain-1 catalytic subunit; Calcium-regulated non-lysosomal thiol-protease which catalyzes limited proteolysis of substrates involved in cytoskeletal remodeling and signal transduction; Belongs to the peptidase C2 family
kmeans	2	Yellow	159	CAPNS1	9606.ENSP00000246533	Calpain small subunit 1; Regulatory subunit of the calcium-regulated non- lysosomal thiol-protease which catalyzes limited proteolysis of substrates involved in cytoskeletal remodeling and signal transduction; EF-hand domain containing
kmeans	2	Yellow	159	CAPZA2	9606.ENSP00000354947	Capping actin protein of muscle z-line alpha subunit 2; F-actin-capping protein subunit alpha-2; F-actin-capping proteins bind in a Ca(2+)-independent manner to the fast growing ends of actin filaments (barbed end) thereby blocking the exchange of subunits at these ends. Unlike other capping proteins (such as gelsolin and severin), these proteins do not sever actin filaments
kmeans	2	Yellow	159	CAPZB	9606.ENSP00000401010	Capping actin protein of muscle z-line beta subunit; F-actin-capping protein subunit beta; F-actin-capping proteins bind in a Ca(2+)-independent manner to the fast growing ends of actin filaments (barbed end) thereby blocking the exchange of subunits at these ends. Unlike other capping proteins (such as gelsolin and severin), these proteins do not sever actin filaments. Plays a role in the regula…
kmeans	2	Yellow	159	CAST	9606.ENSP00000379157	Calpastatin; Specific inhibition of calpain (calcium-dependent cysteine protease). Plays a key role in postmortem tenderization of meat and have been proposed to be involved in muscle protein degradation in living tissue; Belongs to the protease inhibitor I27 (calpastatin) family
kmeans	2	Yellow	159	CCDC88B	9606.ENSP00000349238	Coiled-coil domain-containing protein 88B; Acts as a positive regulator of T-cell maturation and inflammatory function. Required for several functions of T-cells, in both the CD4(+) and the CD8(+) compartments and this includes expression of cell surface markers of activation, proliferation, and cytokine production in response to specific or non-specific stimulation (By similarity). Enhances NK c…
kmeans	2	Yellow	159	CCT2	9606.ENSP00000299300	T-complex protein 1 subunit beta; Molecular chaperone; assists the folding of proteins upon ATP hydrolysis. As part of the BBS/CCT complex may play a role in the assembly of BBSome, a complex involved in ciliogenesis regulating transports vesicles to the cilia. Known to play a role, in vitro, in the folding of actin and tubulin; Chaperonins
kmeans	2	Yellow	159	CDC42	9606.ENSP00000383118	Cell division control protein 42 homolog; Plasma membrane-associated small GTPase which cycles between an active GTP-bound and an inactive GDP-bound state. In active state binds to a variety of effector proteins to regulate cellular responses. Involved in epithelial cell polarization processes. Regulates the bipolar attachment of spindle microtubules to kinetochores before chromosome congression …
kmeans	2	Yellow	159	CDH1	9606.ENSP00000261769	Cadherin-1; Cadherins are calcium-dependent cell adhesion proteins. They preferentially interact with themselves in a homophilic manner in connecting cells; cadherins may thus contribute to the sorting of heterogeneous cell types. CDH1 is involved in mechanisms regulating cell-cell adhesions, mobility and proliferation of epithelial cells. Has a potent invasive suppressor role. It is a ligand for…
kmeans	2	Yellow	159	CEP131	9606.ENSP00000393583	Centrosomal protein of 131 kDa; Component of centriolar satellites contributing to the building of a complex and dynamic network required to regulate cilia/flagellum formation. In proliferating cells, MIB1-mediated ubiquitination induces its sequestration within centriolar satellites, precluding untimely cilia formation initiation. In contrast, during normal and ultraviolet or heat shock cellular…
kmeans	2	Yellow	159	CFAP99	9606.ENSP00000480601	Cilia- and flagella-associated protein 99; Cilia and flagella associated protein 99
kmeans	2	Yellow	159	CFL1	9606.ENSP00000432660	Cofilin-1; Binds to F-actin and exhibits pH-sensitive F-actin depolymerizing activity. Regulates actin cytoskeleton dynamics. Important for normal progress through mitosis and normal cytokinesis. Plays a role in the regulation of cell morphology and cytoskeletal organization. Required for the up-regulation of atypical chemokine receptor ACKR2 from endosomal compartment to cell membrane, increasin…
kmeans	2	Yellow	159	CKM	9606.ENSP00000221476	Creatine kinase, m-type; Creatine kinase M-type; Reversibly catalyzes the transfer of phosphate between ATP and various phosphogens (e.g. creatine phosphate). Creatine kinase isoenzymes play a central role in energy transduction in tissues with large, fluctuating energy demands, such as skeletal muscle, heart, brain and spermatozoa
kmeans	2	Yellow	159	CMBL	9606.ENSP00000296658	Carboxymethylenebutenolidase homolog; Cysteine hydrolase. Can convert the prodrug olmesartan medoxomil into its pharmacologically active metabolite olmerstatan, an angiotensin receptor blocker, in liver and intestine. May also activate beta-lactam antibiotics faropenem medoxomil and lenampicillin
kmeans	2	Yellow	159	CNDP1	9606.ENSP00000351682	Beta-ala-his dipeptidase; Carnosine dipeptidase 1; Belongs to the peptidase M20A family
kmeans	2	Yellow	159	CORO1C	9606.ENSP00000394496	Coronin-1B/1C/6; Coronin-1C; May be involved in cytokinesis, motility, and signal transduction; Belongs to the WD repeat coronin family
kmeans	2	Yellow	159	COTL1	9606.ENSP00000262428	Coactosin like f-actin binding protein 1; Coactosin-like protein; Binds to F-actin in a calcium-independent manner. Has no direct effect on actin depolymerization. Acts as a chaperone for ALOX5 (5LO), influencing both its stability and activity in leukotrienes synthesis
kmeans	2	Yellow	159	DBNL	9606.ENSP00000417653	Drebrin-like protein; Adapter protein that binds F-actin and DNM1, and thereby plays a role in receptor-mediated endocytosis. Plays a role in the reorganization of the actin cytoskeleton, formation of cell projections, such as neurites, in neuron morphogenesis and synapse formation via its interaction with WASL and COBL. Does not bind G- actin and promote actin polymerization by itself. Required …
kmeans	2	Yellow	159	DCTN2	9606.ENSP00000408910	Dynactin subunit 2; Modulates cytoplasmic dynein binding to an organelle, and plays a role in prometaphase chromosome alignment and spindle organization during mitosis. Involved in anchoring microtubules to centrosomes. May play a role in synapse formation during brain development; Dynactin
kmeans	2	Yellow	159	DDX39B	9606.ENSP00000379475	Spliceosome RNA helicase DDX39B; Involved in nuclear export of spliced and unspliced mRNA. Assembling component of the TREX complex which is thought to couple mRNA transcription, processing and nuclear export, and specifically associates with spliced mRNA and not with unspliced pre-mRNA. TREX is recruited to spliced mRNAs by a transcription- independent mechanism, binds to mRNA upstream of the ex…
kmeans	2	Yellow	159	DES	9606.ENSP00000363071	Desmin; Muscle-specific type III intermediate filament essential for proper muscular structure and function. Plays a crucial role in maintaining the structure of sarcomeres, inter-connecting the Z-disks and forming the myofibrils, linking them not only to the sarcolemmal cytoskeleton, but also to the nucleus and mitochondria, thus providing strength for the muscle fiber during activity. In adult …
kmeans	2	Yellow	159	DMKN	9606.ENSP00000342012	Dermokine; May act as a soluble regulator of keratinocyte differentiation
kmeans	2	Yellow	159	DSG2	9606.ENSP00000261590	Desmoglein-2; Component of intercellular desmosome junctions. Involved in the interaction of plaque proteins and intermediate filaments mediating cell-cell adhesion; Desmosomal cadherins
kmeans	2	Yellow	159	EFHD2	9606.ENSP00000365147	EF-hand domain-containing protein D2; May regulate B-cell receptor (BCR)-induced immature and primary B-cell apoptosis. Plays a role as negative regulator of the canonical NF-kappa-B-activating branch. Controls spontaneous apoptosis through the regulation of BCL2L1 abundance; EF-hand domain containing
kmeans	2	Yellow	159	EIF6	9606.ENSP00000363574	Eukaryotic translation initiation factor 6; Binds to the 60S ribosomal subunit and prevents its association with the 40S ribosomal subunit to form the 80S initiation complex in the cytoplasm. Behaves as a stimulatory translation initiation factor downstream insulin/growth factors. Is also involved in ribosome biogenesis. Associates with pre-60S subunits in the nucleus and is involved in its nucle…
[truncated: 530 more rows]

## Sheet: Table S4 _ CL4 enrichment KEGG
enrichment.KEGG
[truncated: 23 more rows]

## Sheet: Table S5_ CL2 enrichment KEGG
enrichment.KEGG-5
[truncated: 25 more rows]

## Sheet: Table S6_CL1 enrichment KEGG
enrichment.KEGG-3
[truncated: 54 more rows]

## Sheet: Table S7_CL3 enrichment KEGG
enrichment.KEGG-4
[truncated: 4 more rows]

## Sheet: Table S8_ plasma derived W InfM
							Ratio (Median all Patients; n=7)
[truncated: 439 more rows]

## Sheet: Table S9_ DEP plasma der WInfM
					Ratio (Median all Patients; n=7)											Abundances (Mean all Patients; n=7)
[truncated: 104 more rows]

[truncated: 10 more sheets: Table S10_CL1 enrichment KEGG, Table S11_CL3 enrichment KEGG, Table S12_CL4 enrichment KEGG, Table S13_Cl2 enrichment KEGG, Table S14 local wound InflM, Table S15 DEP local WInM, Table S16_ common SMI adP, Table S17_ PDWP adhesion on SMI, TableS18_LWP adhesion on SMI, TableS19_SMI_exlusive adhesion]
